# Supplementary material for: Differences in PLA2 Constitution Distinguish the Venom of Two Endemic Brazilian Mountain Lanceheads, Bothrops cotiara and Bothrops fonsecai
Source: MDPI journal article supplement (doi:10.3390/toxins14040237), 2022-03-25
Supplement: s1 [file s1]

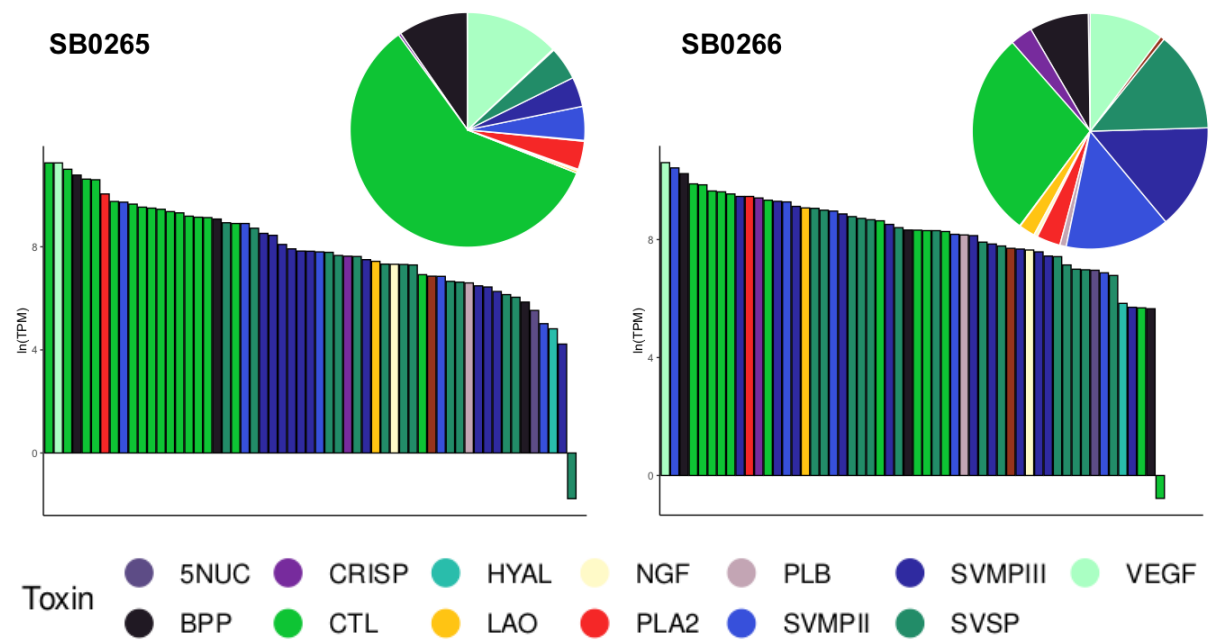

**Figure S1.** Venom gland transcriptome of two individuals of *Bothrops cotiara*.

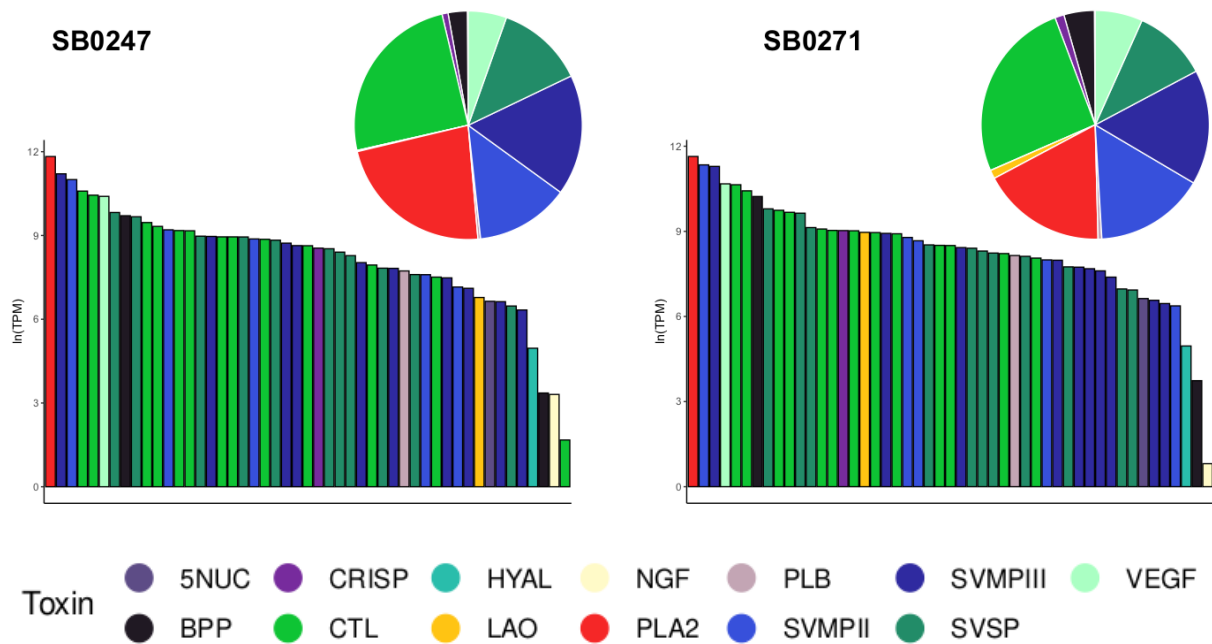

**Figure S2.** Venom gland transcriptome of two individuals of *Bothrops fonsecai*.

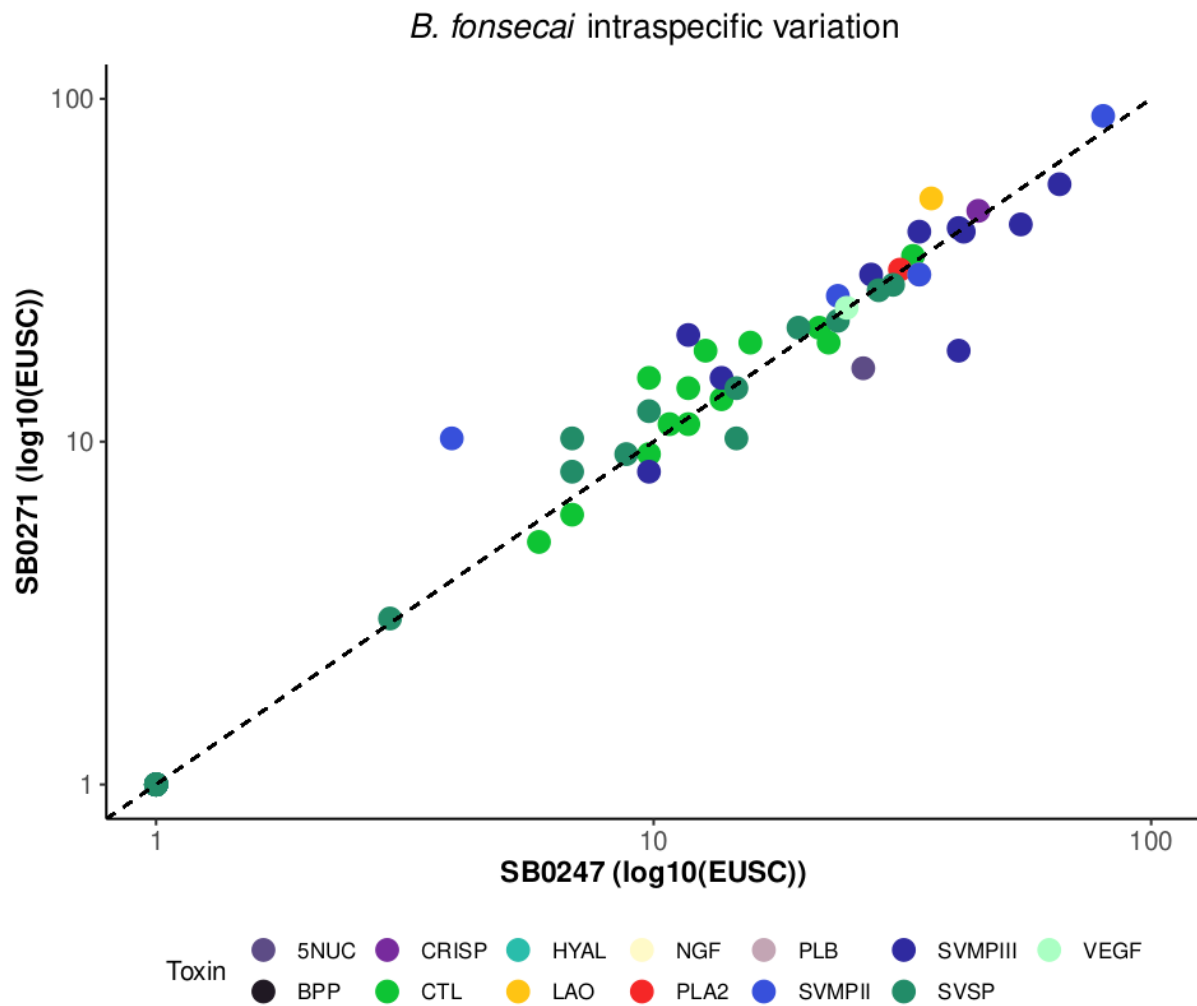

**Figure S3.** Intraspecific variation in the venom proteome of *Bothrops fonsecai*. The dashed line indicates a hypothetical correspondence of protein abundances between individuals.

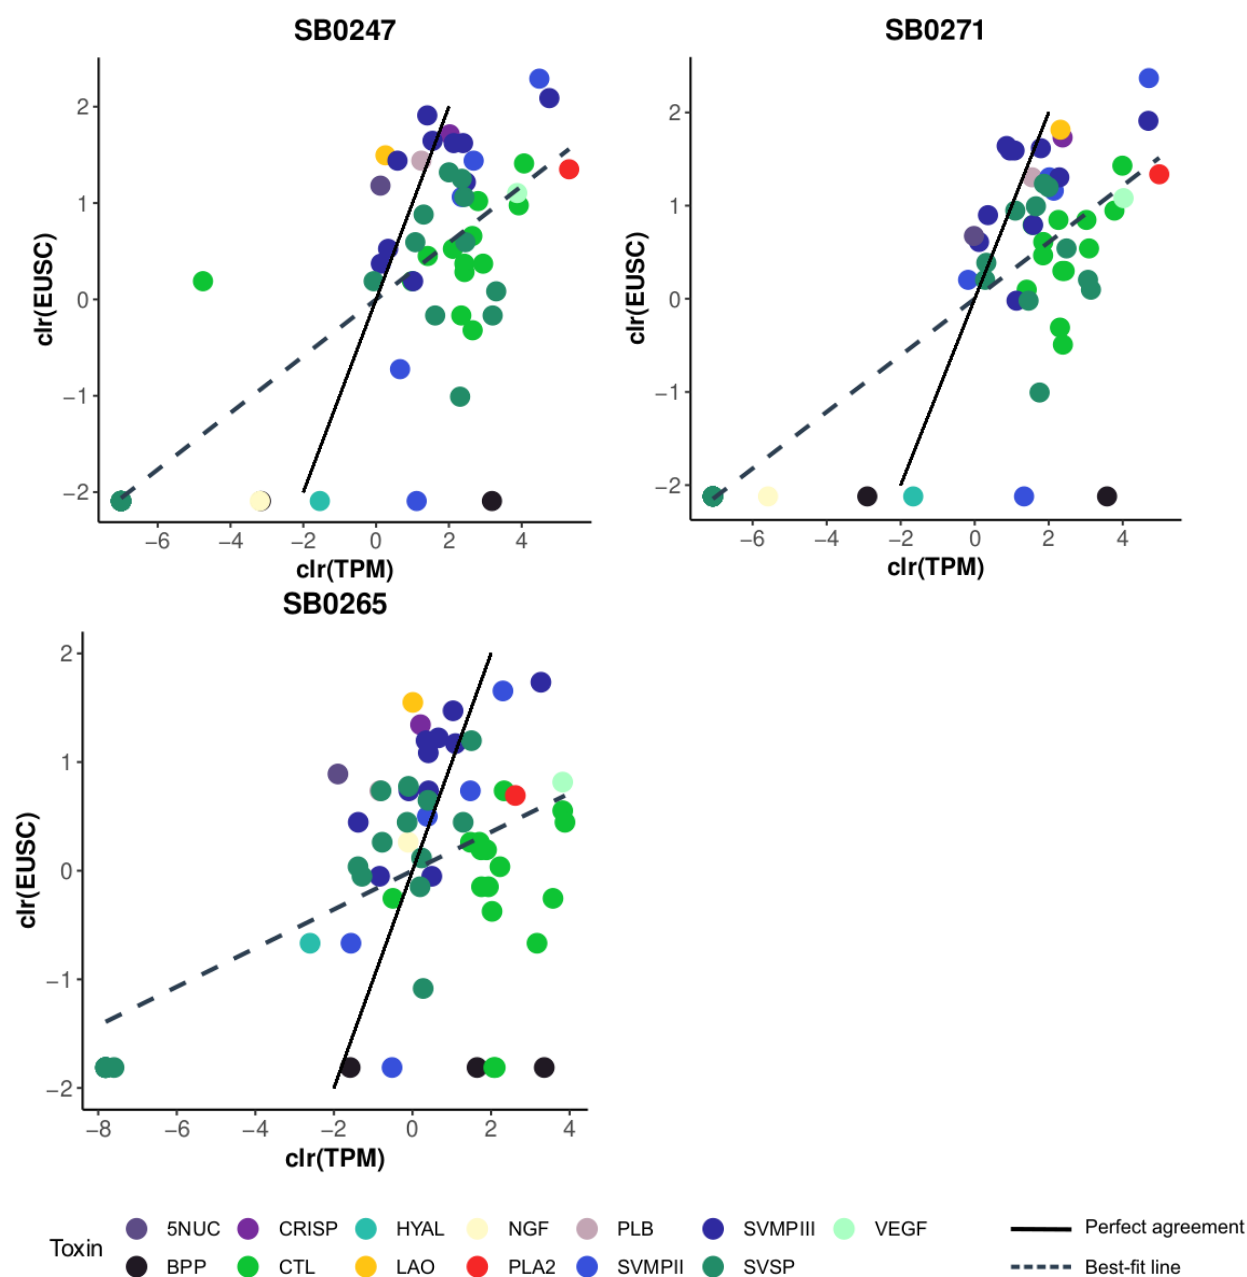

**Figure S4.** Comparison between levels of transcripts (TPM) and protein abundance (normalized EUSC - Exclusive Unique Spectrum Count) in the samples analyzed of *B. cotiara* (SB0265 [ $p = 0.26$ ;  $R = 0.49$ ]) and *B. fonsecai* (SB0247 [ $p = 0.60$ ;  $R = 0.78$ ] and SB0271 [ $p = 0.61$ ;  $R = 0.81$ ]). All data were centered log-ratio transformed ( $\text{clr}$ ). Black lines indicate a perfect agreement between transcript and protein abundances. Dashed lines indicate the best-fit line between transcript and protein abundances.

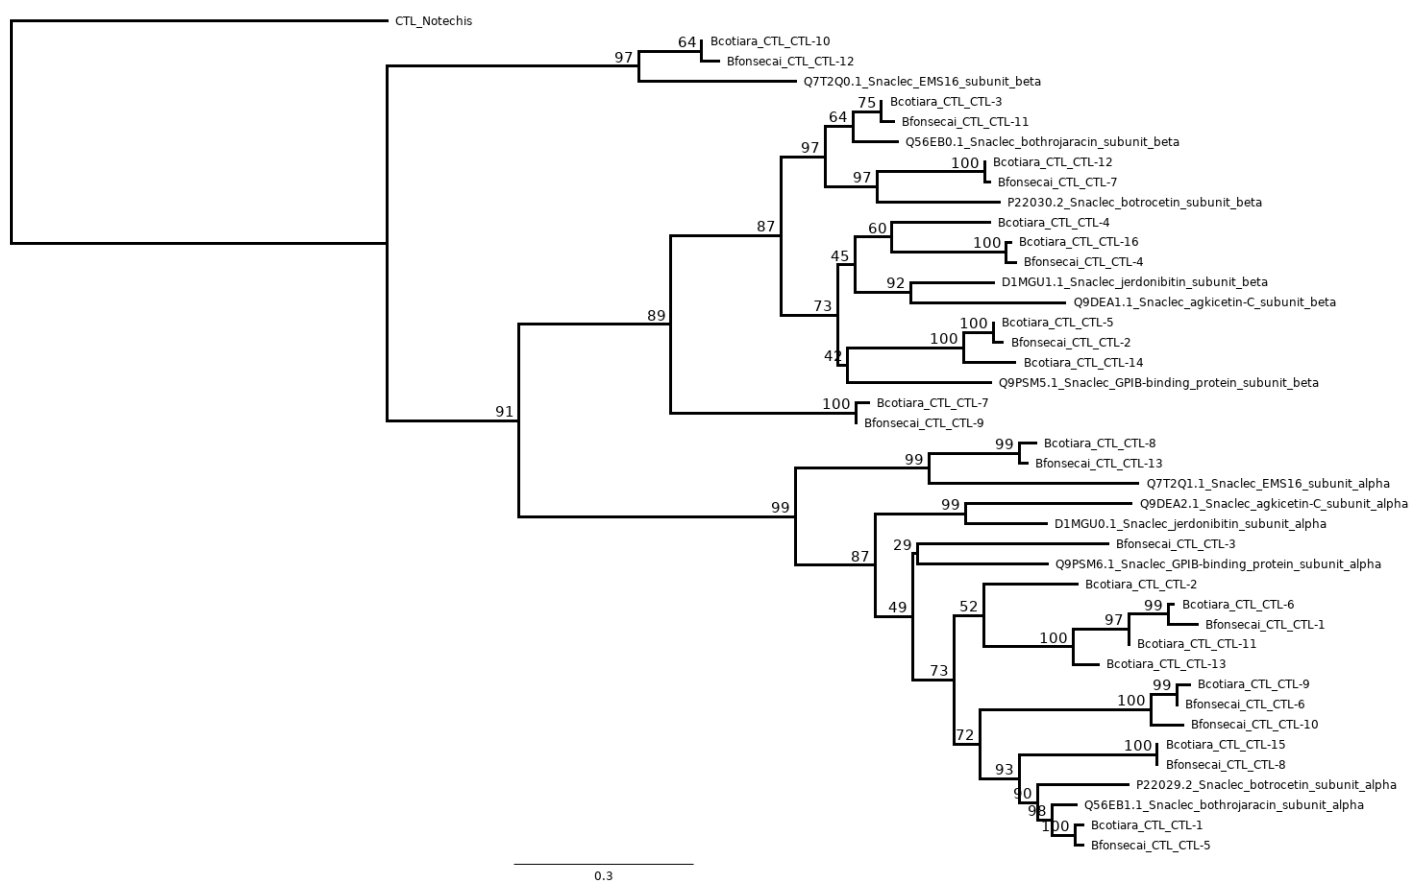

**Figure S5.** CTL phylogeny with known alpha and beta chain CTL homologs of several snake species. The support values of bootstrap are given in tree branches.
