# Supplementary material for: Differences in PLA2 Constitution Distinguish the Venom of Two Endemic Brazilian Mountain Lanceheads, Bothrops cotiara and Bothrops fonsecai
Source: Toxins (Basel). 2022 Mar 25;14(4):237. doi: 10.3390/toxins14040237 (PMC9028134; doi:10.3390/toxins14040237)
Supplement: Supplementary file 1 [file toxins-14-00237-s001.zip › Supplementary_file_1.xlsx]

## Sheet: Table_S1VG_Transcriptome_Bcotia
Table_S1. Venom gland transcriptome of Bothrops cotiara. The expression values represents TPM (transcripts per million reads).
Gene	SB0265VGL	SB0266VGL	Type	Classification	Family
Bcotiara_3FTx_3FTx-1	0.9	0	NonToxin	NonToxin	3FTx
Bcotiara_5NUC_5NUC-1	252.12	1054.25	Toxin	Toxin	5NUC
Bcotiara_ACHE_ACHE-1	4.76	1.58	NonToxin	NonToxin	ACHE
Bcotiara_BPP_BPP-1	48141.6	27902.9	Toxin	Toxin	BPP
Bcotiara_BPP_BPP-2	8750.8	4121.22	Toxin	Toxin	BPP
Bcotiara_BPP_BPP-3	348.68	285.78	Toxin	Toxin	BPP
Bcotiara_CRISP_CRISP-1	2068.56	12227.4	Toxin	Toxin	CRISP
Bcotiara_CTL_CTL-1	15600.2	19711.8	Toxin	Toxin	CTL
Bcotiara_CTL_CTL-2	11114	19083.3	Toxin	Toxin	CTL
Bcotiara_CTL_CTL-4	7363.16	15498	Toxin	Toxin	CTL
Bcotiara_CTL_CTL-3	13882.2	15052.8	Toxin	Toxin	CTL
Bcotiara_CTL_CTL-5	77238.6	13997.6	Toxin	Toxin	CTL
Bcotiara_CTL_CTL-6	40173.2	11348.4	Toxin	Toxin	CTL
Bcotiara_CTL_CTL-7	60342.7	5637.3	Toxin	Toxin	CTL
Bcotiara_CTL_CTL-9	41156.3	4104.15	Toxin	Toxin	CTL
Bcotiara_CTL_CTL-8	9253.72	4042.09	Toxin	Toxin	CTL
Bcotiara_CTL_CTL-10	13364.6	3918.75	Toxin	Toxin	CTL
Bcotiara_CTL_CTL-11	1010.76	294.26	Toxin	Toxin	CTL
Bcotiara_CTL_CTL-12	9780.28	0.46	Toxin	Toxin	CTL
Bcotiara_CTL_CTL-13	17288.7	0	Toxin	Toxin	CTL
Bcotiara_CTL_CTL-14	12793	0	Toxin	Toxin	CTL
Bcotiara_CTL_CTL-15	9395.93	0	Toxin	Toxin	CTL
Bcotiara_CTL_CTL-16	11670.1	0	Toxin	Toxin	CTL
Bcotiara_CYS_CYS-1	31.61	73.69	NonToxin	NonToxin	CYS
Bcotiara_CYS_CYS-2	19.39	52.76	NonToxin	NonToxin	CYS
Bcotiara_DIESTER_DIESTER-1	22.52	573.23	NonToxin	NonToxin	DIESTER
Bcotiara_DIESTER_DIESTER-2	15.74	493.81	NonToxin	NonToxin	DIESTER
Bcotiara_Ficolin_Ficolin-1	1.66	5.52	NonToxin	NonToxin	Ficolin
Bcotiara_HYAL_HYAL-1	123.81	342.6	Toxin	Toxin	HYAL
Bcotiara_KUN_KUN-1	443.19	287.9	NonToxin	NonToxin	KUN
Bcotiara_LAO_LAO-1	1695.47	8720.98	Toxin	Toxin	LAO
Bcotiara_NGF_NGF-1	1512.11	2094.2	Toxin	Toxin	NGF
Bcotiara_PLA2_PLA2-1	23139.7	12879.1	Toxin	Toxin	PLA2
Bcotiara_PLB_PLB-1	733.69	3488.45	Toxin	Toxin	PLB
Bcotiara_SVLIPA_SVLIPA-1	19.23	51.68	NonToxin	NonToxin	SVLIPA
Bcotiara_SVMPII_SVMPII-1	7360.6	33893.2	Toxin	Toxin	SVMPII
Bcotiara_SVMPII_SVMPII-2	16826.9	10696.8	Toxin	Toxin	SVMPII
Bcotiara_SVMPII_SVMPII-3	2446.3	7834.72	Toxin	Toxin	SVMPII
Bcotiara_SVMPII_SVMPII-4	946.56	3566.43	Toxin	Toxin	SVMPII
Bcotiara_SVMPII_SVMPII-5	151.06	965.95	Toxin	Toxin	SVMPII
Bcotiara_SVMPIII_SVMPIII-1	3263.34	12883.1	Toxin	Toxin	SVMPIII
Bcotiara_SVMPIII_SVMPIII-2	2749.51	10911	Toxin	Toxin	SVMPIII
Bcotiara_SVMPIII_SVMPIII-3	5017.79	9197	Toxin	Toxin	SVMPIII
Bcotiara_SVMPIII_SVMPIII-4	2526.28	7111.65	Toxin	Toxin	SVMPIII
Bcotiara_SVMPIII_SVMPIII-5	4654.77	4991.41	Toxin	Toxin	SVMPIII
Bcotiara_SVMPIII_SVMPIII-6	68.43	3410.1	Toxin	Toxin	SVMPIII
Bcotiara_SVMPIII_SVMPIII-7	626.44	2565.88	Toxin	Toxin	SVMPIII
Bcotiara_SVMPIII_SVMPIII-8	1809.16	2161.87	Toxin	Toxin	SVMPIII
Bcotiara_SVMPIII_SVMPIII-9	2508.39	1966.54	Toxin	Toxin	SVMPIII
Bcotiara_SVMPIII_SVMPIII-10	526.29	1706.57	Toxin	Toxin	SVMPIII
Bcotiara_SVMPIII_SVMPIII-11	655.2	300.37	Toxin	Toxin	SVMPIII
Bcotiara_SVSP_SVSP-1	1472.08	8607.59	Toxin	Toxin	SVSP
Bcotiara_SVSP_SVSP-2	7571.89	8082.22	Toxin	Toxin	SVSP
Bcotiara_SVSP_SVSP-3	2126.59	6501.62	Toxin	Toxin	SVSP
Bcotiara_SVSP_SVSP-4	2405.83	6114.16	Toxin	Toxin	SVSP
Bcotiara_SVSP_SVSP-5	2044.17	5848.25	Toxin	Toxin	SVSP
Bcotiara_SVSP_SVSP-6	6126.87	4468.19	Toxin	Toxin	SVSP
Bcotiara_SVSP_SVSP-7	756.98	4039.18	Toxin	Toxin	SVSP
Bcotiara_SVSP_SVSP-8	0.17	2734.75	Toxin	Toxin	SVSP
Bcotiara_SVSP_SVSP-9	1522.56	2398.37	Toxin	Toxin	SVSP
Bcotiara_SVSP_SVSP-10	466.08	1671.94	Toxin	Toxin	SVSP
Bcotiara_SVSP_SVSP-11	779.82	1260.8	Toxin	Toxin	SVSP
Bcotiara_SVSP_SVSP-12	0	1092.3	Toxin	Toxin	SVSP
Bcotiara_SVSP_SVSP-13	1500.16	1071.16	Toxin	Toxin	SVSP
Bcotiara_SVSP_SVSP-14	421	882.12	Toxin	Toxin	SVSP
Bcotiara_TCTP_TCTP-1	952.9	2217.59	Toxin	Toxin	TCTP
Bcotiara_VDP4_VDP4-1	35.42	87.2	NonToxin	NonToxin	VDP4
Bcotiara_VEGF_VEGF-1	77191.5	40561.3	Toxin	Toxin	VEGF
Bcotiara_Vespryn_Vespryn-1	0	61.64	NonToxin	NonToxin	Vespryn
Bcotiara_WAP_WAP-1	12.34	36.27	NonToxin	NonToxin	WAP
Bcotiara_WAP_WAP-2	1.03	5.24	NonToxin	NonToxin	WAP
SB0265VGL_bridger_k30_10006	6.77	19.8	NonToxin	NonToxin	COMM domain containing 8
SB0265VGL_bridger_k30_10022	9.6	5.95	NonToxin	Uncharacterized	Uncharacterized
SB0265VGL_bridger_k30_10056	15.22	63.46	NonToxin	Uncharacterized	Uncharacterized
SB0265VGL_bridger_k30_1007	105.36	38.86	NonToxin	NonToxin	GDAY02000490|Agkistrodon_contortrix_contortrix casein kinase II subunit alpha
SB0265VGL_bridger_k30_10132	6.86	16.6	NonToxin	NonToxin	GDAY02002861|Agkistrodon_contortrix_contortrix UDP-galactose translocator-like protein
SB0265VGL_bridger_k30_10144	12.35	16.37	NonToxin	NonToxin	ENSPVIG00000020666|ENSPVIP00000027833|C20orf27 C20orf27 chromosome unknown C20orf27 homolog [Source:NCBI gene;Acc:110079841]
SB0265VGL_bridger_k30_10147	9.21	12.72	NonToxin	NonToxin	GDAY02002041|Agkistrodon_contortrix_contortrix RING finger protein 103-like protein
SB0265VGL_bridger_k30_10168	8.98	9.35	NonToxin	Uncharacterized	Uncharacterized
SB0265VGL_bridger_k30_1020	682.82	768.3	NonToxin	NonToxin	GAAZ01000077|Crotalus_horridus Adenine phosphoribosyltransferase-like protein
SB0265VGL_bridger_k30_1022	429.33	1179.68	NonToxin	NonToxin	GAAZ01002128|Crotalus_horridus 60S ribosomal protein L10
SB0265VGL_bridger_k30_10222	5.34	3.14	NonToxin	NonToxin	abhydrolase domain containing 11
SB0265VGL_bridger_k30_10247	8.41	30.27	NonToxin	NonToxin	GBSH01002148|Boiga_irregularis pyridoxal-dependent decarboxylase
SB0265VGL_bridger_k30_10250	15.22	39.76	NonToxin	NonToxin	abhydrolase domain containing 13
SB0265VGL_bridger_k30_10267	7.26	35.77	NonToxin	NonToxin	GAAZ01000306|Crotalus_horridus protein BTG1-like protein
SB0265VGL_bridger_k30_10273	14.43	8.57	NonToxin	NonToxin	GBEX01000504|Crotalus_adamanteus UPF0452 protein C7orf41 homolog
SB0265VGL_bridger_k30_10290	14.17	43.56	NonToxin	NonToxin	GDAY02001467|Agkistrodon_contortrix_contortrix 39S ribosomal protein L14, mitochondrial
SB0265VGL_bridger_k30_10296	12.77	24.79	NonToxin	NonToxin	GDAY02001893|Agkistrodon_contortrix_contortrix Proteasome assembly chaperone 1-like protein
SB0265VGL_bridger_k30_1034	444.99	416.24	NonToxin	NonToxin	GAAZ01000124|Crotalus_horridus Fructose-bisphosphate aldolase A-like protein
SB0265VGL_bridger_k30_10378	13.85	55.14	NonToxin	NonToxin	GAAZ01000964|Crotalus_horridus Gamma-interferon-inducible lysosomal thiol
SB0265VGL_bridger_k30_10382	7.09	10.32	NonToxin	NonToxin	GBEX01000961|Crotalus_adamanteus 1,2-dihydroxy-3-keto-5-methylthiopentene
SB0265VGL_bridger_k30_10383	6.57	14.36	NonToxin	NonToxin	GDAY02002343|Agkistrodon_contortrix_contortrix hypothetical protein
SB0265VGL_bridger_k30_10403	9.47	12.51	NonToxin	NonToxin	GDAY02000299|Agkistrodon_contortrix_contortrix putative C11orf46-like protein
SB0265VGL_bridger_k30_10433	13.36	33.84	NonToxin	NonToxin	GAAZ01001303|Crotalus_horridus Putative LOC415385-like protein
SB0265VGL_bridger_k30_10455	13.69	29.42	NonToxin	NonToxin	GDAY02001869|Agkistrodon_contortrix_contortrix Prostaglandin reductase 2-like protein
SB0265VGL_bridger_k30_10462	9.6	11.47	NonToxin	NonToxin	GBSI01000818|Hypsiglena_sp,_JMG-2014 endophilin-A2
SB0265VGL_bridger_k30_10508	13.43	13.17	NonToxin	NonToxin	GBEX01002691|Crotalus_adamanteus pyruvate kinase muscle isozyme
SB0265VGL_bridger_k30_1051	160.13	247.69	NonToxin	NonToxin	solute carrier family 30 (zinc transporter), member 6
SB0265VGL_bridger_k30_10535	9.57	24.76	NonToxin	NonToxin	xylosylprotein beta 1,4-galactosyltransferase, polypeptide 7
SB0265VGL_bridger_k30_10572	12.63	15.63	NonToxin	Uncharacterized	Uncharacterized
SB0265VGL_bridger_k30_10607	8.53	57.87	NonToxin	NonToxin	GBSI01001433|Hypsiglena_sp,_JMG-2014 transcription factor A
SB0265VGL_bridger_k30_10642	8.1	45.74	NonToxin	NonToxin	WW domain binding protein 4
SB0265VGL_bridger_k30_10684	9.86	20.32	NonToxin	NonToxin	GBEX01001944|Crotalus_adamanteus Mediator of RNA polymerase II transcription
SB0265VGL_bridger_k30_10688	9.87	23.93	NonToxin	NonToxin	7-dehydrocholesterol reductase
SB0265VGL_bridger_k30_10695	6.86	39.08	NonToxin	Uncharacterized	Uncharacterized
SB0265VGL_bridger_k30_10712	11.19	38.33	NonToxin	NonToxin	GDAY02001658|Agkistrodon_contortrix_contortrix nudC domain-containing protein 2
SB0265VGL_bridger_k30_10729	5.77	9.51	NonToxin	NonToxin	GBEX01003495|Crotalus_adamanteus thioredoxin-like protein 4B
SB0265VGL_bridger_k30_10745	8.55	17.72	NonToxin	NonToxin	coenzyme Q5, methyltransferase
SB0265VGL_bridger_k30_1075	24.66	16.96	NonToxin	NonToxin	ENSNSUP00000023915,1|WFS1 WFS1 wolframin ER transmembrane glycoprotein [Source:HGNC Symbol;Acc:HGNC:12762]
SB0265VGL_bridger_k30_10797	7.33	6.47	NonToxin	Uncharacterized	Uncharacterized
SB0265VGL_bridger_k30_10804	8.7	26.35	NonToxin	NonToxin	GAAZ01001484|Crotalus_horridus 39S ribosomal protein L19, mitochondrial
SB0265VGL_bridger_k30_10810	7.25	11.43	NonToxin	NonToxin	GDAY02002261|Agkistrodon_contortrix_contortrix Serine/threonine-protein kinase Sgk3-like
SB0265VGL_bridger_k30_10837	30.36	147.25	NonToxin	Uncharacterized	Uncharacterized
SB0265VGL_bridger_k30_10839	7.46	17.29	NonToxin	NonToxin	GBEX01002651|Crotalus_adamanteus proteasome assembly chaperone 2
SB0265VGL_bridger_k30_10841	14.41	22.23	NonToxin	NonToxin	ENSNSUP00000027474,1|TMEM60 TMEM60 transmembrane protein 60 [Source:HGNC Symbol;Acc:HGNC:21754]
SB0265VGL_bridger_k30_10854	13.27	30.08	NonToxin	NonToxin	GBSH01003003|Boiga_irregularis ubiquitin-conjugating enzyme E2 variant 1
SB0265VGL_bridger_k30_1086	183.63	334.75	NonToxin	NonToxin	GAAZ01001129|Crotalus_horridus Hypoxia up-regulated protein 1
SB0265VGL_bridger_k30_10864	13.24	22.22	NonToxin	NonToxin	GBEW01000230|Micrurus_fulvius Charged multivesicular body protein 2a-like
SB0265VGL_bridger_k30_10868	11.66	10.77	NonToxin	Uncharacterized	Uncharacterized
SB0265VGL_bridger_k30_10873	9.43	19.26	NonToxin	NonToxin	mitochondrial ribosomal protein L27
SB0265VGL_bridger_k30_10903	10.23	38.39	NonToxin	NonToxin	GBSH01000642|Boiga_irregularis centrin-2
SB0265VGL_bridger_k30_10904	3.56	16.91	NonToxin	NonToxin	GAAZ01002214|Crotalus_horridus s-adenosylmethionine decarboxylase
SB0265VGL_bridger_k30_10924	9.72	5.41	NonToxin	NonToxin	GBSH01000473|Boiga_irregularis chromosome 1 orf 69
SB0265VGL_bridger_k30_10930	5.9	32.47	NonToxin	NonToxin	GAAZ01000556|Crotalus_horridus COMM domain-containing protein 8-like protein
SB0265VGL_bridger_k30_1099	501.1	1384.56	NonToxin	NonToxin	GAAZ01002140|Crotalus_horridus 60S ribosomal protein L22
SB0265VGL_bridger_k30_11003	1.67	10.89	NonToxin	Uncharacterized	Uncharacterized
SB0265VGL_bridger_k30_11025	7.34	26.27	NonToxin	NonToxin	ENSNSUP00000019230,1|MRPL4 MRPL4 mitochondrial ribosomal protein L4 [Source:HGNC Symbol;Acc:HGNC:14276]
SB0265VGL_bridger_k30_1104	5.31	26.3	NonToxin	Uncharacterized	Uncharacterized
SB0265VGL_bridger_k30_11046	2	12.09	NonToxin	NonToxin	GDAY02001060|Agkistrodon_contortrix_contortrix hypothetical protein
SB0265VGL_bridger_k30_11055	8.83	4.16	NonToxin	NonToxin	ENSNSUP00000015418,1|TIMM22 TIMM22 translocase of inner mitochondrial membrane 22 [Source:HGNC Symbol;Acc:HGNC:17317]
SB0265VGL_bridger_k30_11057	8.11	20.83	NonToxin	NonToxin	GDAY02002762|Agkistrodon_contortrix_contortrix tumor protein p53-inducible nuclear protein
SB0265VGL_bridger_k30_11082	11.8	75.53	NonToxin	NonToxin	|ENSACAG00000006333|ENSACAP00000006195| NOP16 nucleolar protein [Source:NCBI gene;Acc:100554387]
SB0265VGL_bridger_k30_11092	7	11.98	NonToxin	NonToxin	GAAZ01002478|Crotalus_horridus Tafazzin-like protein
SB0265VGL_bridger_k30_1115	153.33	53.46	NonToxin	NonToxin	GBSH01000401|Boiga_irregularis Bax inhibitor 1-like protein
SB0265VGL_bridger_k30_11164	1.37	11.29	NonToxin	Uncharacterized	Uncharacterized
SB0265VGL_bridger_k30_11215	11.65	48.49	NonToxin	NonToxin	GBEX01001197|Crotalus_adamanteus extracellular superoxide dismutase (Cu-Zn)-like
SB0265VGL_bridger_k30_1123	435.77	1140.22	NonToxin	NonToxin	GAAZ01002144|Crotalus_horridus 60S ribosomal protein L24
SB0265VGL_bridger_k30_1126	441.61	318.37	NonToxin	NonToxin	GBEX01001278|Crotalus_adamanteus Ferritin heavy chain A-like protein
SB0265VGL_bridger_k30_1134	53.05	90.15	NonToxin	NonToxin	GBSH01000151|Boiga_irregularis Neutral amino acid transporter B(0)-like
SB0265VGL_bridger_k30_11344	10.21	21.5	NonToxin	NonToxin	GAAZ01000251|Crotalus_horridus Aurora kinase A-interacting protein-like
SB0265VGL_bridger_k30_11345	6.63	10.61	NonToxin	NonToxin	Zinc finger, RING-type
SB0265VGL_bridger_k30_11360	5.75	9.52	NonToxin	NonToxin	GBSI01000638|Hypsiglena_sp,_JMG-2014 protein CYR61
SB0265VGL_bridger_k30_11365	8.29	44.06	NonToxin	NonToxin	GDAY02001649|Agkistrodon_contortrix_contortrix nuclear migration protein nudC
SB0265VGL_bridger_k30_11395	8.67	40.14	NonToxin	NonToxin	GAAZ01002064|Crotalus_horridus u2 small nuclear ribonucleoprotein B''-like
SB0265VGL_bridger_k30_11398	4.41	18.56	NonToxin	NonToxin	GBEX01001777|Crotalus_adamanteus lens epithelium-derived growth factor-like
SB0265VGL_bridger_k30_1153	341.07	1168.46	NonToxin	NonToxin	GBEW01000891|Micrurus_fulvius 40S ribosomal protein S21
SB0265VGL_bridger_k30_11568	18.68	41.62	NonToxin	NonToxin	GBSI01000324|Hypsiglena_sp,_JMG-2014 cDNA sequence BC034664
SB0265VGL_bridger_k30_11585	4.28	1.18	NonToxin	NonToxin	GBEX01001108|Crotalus_adamanteus epithelial membrane protein 3 isoform X1
SB0265VGL_bridger_k30_11595	7.69	33.71	NonToxin	NonToxin	GAAZ01002566|Crotalus_horridus THO complex subunit 7-like protein
SB0265VGL_bridger_k30_11605	3.43	11.14	NonToxin	Uncharacterized	Uncharacterized
SB0265VGL_bridger_k30_11628	8.75	32.07	NonToxin	NonToxin	GBEW01000302|Micrurus_fulvius Diphosphoinositol polyphosphate phosphohydrolase
SB0265VGL_bridger_k30_11646	13.35	14.5	NonToxin	Uncharacterized	Uncharacterized
SB0265VGL_bridger_k30_11656	8.2	31.62	NonToxin	Uncharacterized	Uncharacterized
SB0265VGL_bridger_k30_11665	8.68	18.18	NonToxin	NonToxin	ENSNSUP00000016658,1|UTP23 UTP23 UTP23 small subunit processome component [Source:HGNC Symbol;Acc:HGNC:28224]
SB0265VGL_bridger_k30_11706	8.25	16.64	NonToxin	NonToxin	GBEX01002233|Crotalus_adamanteus Na(+)/H(+) exchange regulatory cofactor NHE-RF1
SB0265VGL_bridger_k30_11746	4.7	6.62	NonToxin	NonToxin	ENSNSUP00000021657,1|SLC10A3 SLC10A3 solute carrier family 10 member 3 [Source:HGNC Symbol;Acc:HGNC:22979]
SB0265VGL_bridger_k30_11755	6.95	28.67	NonToxin	NonToxin	beta-1,3-N-acetylgalactosaminyltransferase 2
SB0265VGL_bridger_k30_1177	35.96	164.35	NonToxin	NonToxin	GAAZ01002917|Crotalus_horridus Vigilin-like protein
SB0265VGL_bridger_k30_11770	8.61	19.94	NonToxin	NonToxin	GBEX01002841|Crotalus_adamanteus RING finger protein 113A-like
SB0265VGL_bridger_k30_11781	6.25	10.68	NonToxin	NonToxin	ENSPVIG00000021991|ENSPVIP00000029860|AUH AUH AU RNA binding methylglutaconyl-CoA hydratase [Source:NCBI gene;Acc:110081112]
SB0265VGL_bridger_k30_11801	3.52	19.88	NonToxin	Uncharacterized	Uncharacterized
SB0265VGL_bridger_k30_11805	8.58	20.43	NonToxin	Uncharacterized	Uncharacterized
SB0265VGL_bridger_k30_11836	7	12.01	NonToxin	NonToxin	GBEW01001199|Micrurus_fulvius Vacuolar-sorting protein SNF8-like protein
SB0265VGL_bridger_k30_1185	353.38	330.03	NonToxin	NonToxin	GBEX01000326|Crotalus_adamanteus ATP synthase lipid-binding protein,
SB0265VGL_bridger_k30_11903	9.04	27.92	NonToxin	NonToxin	GAAZ01000985|Crotalus_horridus glycine N-methyltransferase-like protein
SB0265VGL_bridger_k30_11912	9.24	19.3	NonToxin	NonToxin	GDAY02001479|Agkistrodon_contortrix_contortrix mitochondrial ribosomal protein L50
SB0265VGL_bridger_k30_11947	6.14	7.84	NonToxin	Uncharacterized	Uncharacterized
SB0265VGL_bridger_k30_11963	2.21	8.59	NonToxin	Uncharacterized	Uncharacterized
SB0265VGL_bridger_k30_11975	5.88	19.14	NonToxin	NonToxin	GAAZ01001681|Crotalus_horridus Nuclear distribution protein nudE-like protein
SB0265VGL_bridger_k30_1198	300.33	399.6	NonToxin	NonToxin	GDAY02000780|Agkistrodon_contortrix_contortrix Transmembrane emp24 domain-containing protein 9
SB0265VGL_bridger_k30_11987	3.39	17.19	NonToxin	NonToxin	GAAZ01001542|Crotalus_horridus Soluble calcium-activated nucleotidase 1
SB0265VGL_bridger_k30_1199	468.94	1873.21	NonToxin	NonToxin	GBEW01000886|Micrurus_fulvius 40S ribosomal protein S16
SB0265VGL_bridger_k30_12005	7.82	12.6	NonToxin	NonToxin	GAAZ01002874|Crotalus_horridus UPF0449 protein C19orf25-like protein
SB0265VGL_bridger_k30_12008	10.17	65.66	NonToxin	NonToxin	GDAY02000128|Agkistrodon_contortrix_contortrix Aminoacyl tRNA synthase complex-interacting
SB0265VGL_bridger_k30_12010	6	18.82	NonToxin	NonToxin	GAAZ01002062|Crotalus_horridus H/ACA ribonucleoprotein complex subunit 2-like
SB0265VGL_bridger_k30_1202	51.61	37.15	NonToxin	NonToxin	GBEX01001848|Crotalus_adamanteus uncharacterized protein LOC101938480
SB0265VGL_bridger_k30_12025	8.11	11.23	NonToxin	NonToxin	ENSNSUP00000017605,1|SLC2A8 SLC2A8 solute carrier family 2 member 8 [Source:HGNC Symbol;Acc:HGNC:13812]
SB0265VGL_bridger_k30_1204	379.71	1229.06	NonToxin	NonToxin	GDAY02001589|Agkistrodon_contortrix_contortrix mesencephalic astrocyte-derived neurotrophic
SB0265VGL_bridger_k30_12069	8.65	22.76	NonToxin	NonToxin	GAAZ01001468|Crotalus_horridus M-phase phosphoprotein 6
SB0265VGL_bridger_k30_1208	302.8	568.15	NonToxin	NonToxin	GAAZ01002245|Crotalus_horridus Protein transport protein Sec61 subunit alpha
SB0265VGL_bridger_k30_12089	4.24	11.41	NonToxin	NonToxin	GBEW01001174|Micrurus_fulvius e3 ubiquitin-protein ligase RNF152-like protein
SB0265VGL_bridger_k30_122	72.29	91.92	NonToxin	NonToxin	Fumarylacetoacetase
SB0265VGL_bridger_k30_12216	5.44	19.78	NonToxin	NonToxin	ENSNSUP00000023959,1|MRPS30 MRPS30 mitochondrial ribosomal protein S30 [Source:HGNC Symbol;Acc:HGNC:8769]
SB0265VGL_bridger_k30_12222	3.75	6.06	NonToxin	NonToxin	GAAZ01001983|Crotalus_horridus ras-related protein Rab-5A-like protein
SB0265VGL_bridger_k30_12236	3.33	7.67	NonToxin	Uncharacterized	Uncharacterized
SB0265VGL_bridger_k30_12266	3.19	19.93	NonToxin	Uncharacterized	Uncharacterized
SB0265VGL_bridger_k30_1230	322.57	449.17	NonToxin	NonToxin	GDAY02000817|Agkistrodon_contortrix_contortrix ER lumen protein retaining receptor 2-like
SB0265VGL_bridger_k30_12321	11.49	26.24	NonToxin	Uncharacterized	Uncharacterized
SB0265VGL_bridger_k30_1235	145.85	725.42	NonToxin	NonToxin	GBSH01003153|Boiga_irregularis Xaa-Pro aminopeptidase 2
SB0265VGL_bridger_k30_12350	9.12	6.03	NonToxin	NonToxin	ENSPVIG00000015285|ENSPVIP00000020034|OXNAD1 OXNAD1 oxidoreductase NAD binding domain containing 1 [Source:NCBI gene;Acc:110072105]
SB0265VGL_bridger_k30_12379	7.29	16.94	NonToxin	NonToxin	ENSNSUP00000005107,1
SB0265VGL_bridger_k30_124	44.79	132.97	NonToxin	NonToxin	GAAZ01001890|Crotalus_horridus Proliferation-associated protein 2G4-like
SB0265VGL_bridger_k30_1241	333.85	477.12	NonToxin	NonToxin	GDAY02000359|Agkistrodon_contortrix_contortrix 45 kDa calcium-binding protein
SB0265VGL_bridger_k30_12423	7.93	12.89	NonToxin	NonToxin	GBEX01003995|Crotalus_adamanteus Ribosome biogenesis protein WDR12-like protein
SB0265VGL_bridger_k30_12441	8.56	27.31	NonToxin	NonToxin	ENSNSUP00000026883,1|TIMM9 TIMM9 translocase of inner mitochondrial membrane 9 [Source:HGNC Symbol;Acc:HGNC:11819]
SB0265VGL_bridger_k30_12452	7.88	25.43	NonToxin	NonToxin	GDAY02002991|Agkistrodon_contortrix_contortrix Zinc finger FYVE domain-containing protein
SB0265VGL_bridger_k30_12482	6.84	20.41	NonToxin	Uncharacterized	Uncharacterized
SB0265VGL_bridger_k30_1249	149.78	126.95	NonToxin	NonToxin	GBEW01000050|Micrurus_fulvius ADP-ribosylation factor 3
SB0265VGL_bridger_k30_12518	3.73	5.65	NonToxin	NonToxin	GDAY02002556|Agkistrodon_contortrix_contortrix SAM pointed domain-containing Ets transcription
SB0265VGL_bridger_k30_12521	8.71	18.11	NonToxin	NonToxin	GBEX01000226|Crotalus_adamanteus Annexin A4-like protein
SB0265VGL_bridger_k30_1256	335.33	471.77	NonToxin	NonToxin	GBEX01001502|Crotalus_adamanteus Hemoglobin subunit rho
SB0265VGL_bridger_k30_12587	4.15	19.5	NonToxin	Uncharacterized	Uncharacterized
SB0265VGL_bridger_k30_1260	306.39	1033.29	NonToxin	NonToxin	GAAZ01002169|Crotalus_horridus 60S ribosomal protein L8
SB0265VGL_bridger_k30_12664	8.32	3.23	NonToxin	NonToxin	ENSNSUP00000021308,1|TNFAIP8L1 TNFAIP8L1 TNF alpha induced protein 8 like 1 [Source:HGNC Symbol;Acc:HGNC:28279]
SB0265VGL_bridger_k30_12670	7.68	14.67	NonToxin	Uncharacterized	Uncharacterized
SB0265VGL_bridger_k30_12688	10.05	15.67	NonToxin	NonToxin	GBEX01002423|Crotalus_adamanteus peptidyl-prolyl cis-trans isomerase-like 1-like
SB0265VGL_bridger_k30_1270	365.43	383.33	NonToxin	NonToxin	GAAZ01001331|Crotalus_horridus Macrophage migration inhibitory factor
SB0265VGL_bridger_k30_12727	9.78	19.56	NonToxin	NonToxin	GAAZ01001459|Crotalus_horridus Molybdopterin synthase catalytic subunit
SB0265VGL_bridger_k30_12762	2.62	10.3	NonToxin	NonToxin	coiled-coil domain containing 117
SB0265VGL_bridger_k30_12770	6.64	17.63	NonToxin	NonToxin	ENSNSUP00000002855,1|EIF2B2 EIF2B2 eukaryotic translation initiation factor 2B subunit beta [Source:HGNC Symbol;Acc:HGNC:3258]
SB0265VGL_bridger_k30_12885	4.81	10.53	NonToxin	Uncharacterized	Uncharacterized
SB0265VGL_bridger_k30_1292	236.26	305.44	NonToxin	NonToxin	GBEX01003017|Crotalus_adamanteus protein S100-A6
SB0265VGL_bridger_k30_12926	5.55	9.78	NonToxin	NonToxin	ENSACAG00000015092|ENSACAP00000014831|AP4S1 AP4S1 adaptor related protein complex 4 subunit sigma 1 [Source:NCBI gene;Acc:100554474]
SB0265VGL_bridger_k30_1293	479.08	917.2	NonToxin	NonToxin	GBEX01003303|Crotalus_adamanteus stress-associated endoplasmic reticulum protein
SB0265VGL_bridger_k30_1295	4.77	24.27	NonToxin	Uncharacterized	Uncharacterized
SB0265VGL_bridger_k30_12967	4.47	23.18	NonToxin	NonToxin	Histone deacetylase
SB0265VGL_bridger_k30_12999	9.51	9.71	NonToxin	Uncharacterized	Uncharacterized
SB0265VGL_bridger_k30_13021	8.64	17.9	NonToxin	NonToxin	GBEX01001021|Crotalus_adamanteus DPH3 homolog
SB0265VGL_bridger_k30_1303	378.13	489.84	NonToxin	NonToxin	GAAZ01001786|Crotalus_horridus 14 kDa phosphohistidine phosphatase-like
SB0265VGL_bridger_k30_13081	6.31	30.02	NonToxin	NonToxin	GDAY02001758|Agkistrodon_contortrix_contortrix phosphoacetylglucosamine mutase-like protein
SB0265VGL_bridger_k30_13146	7.39	14.82	NonToxin	Uncharacterized	Uncharacterized
SB0265VGL_bridger_k30_13157	6.21	7.34	NonToxin	NonToxin	GBSH01002622|Boiga_irregularis metalloreductase STEAP3 isoform X6
SB0265VGL_bridger_k30_13169	6.22	27.79	NonToxin	NonToxin	GAAZ01000986|Crotalus_horridus glycogenin-1-like protein
SB0265VGL_bridger_k30_13185	5.17	12.41	NonToxin	Uncharacterized	Uncharacterized
SB0265VGL_bridger_k30_13263	1.7	4.43	NonToxin	Uncharacterized	Uncharacterized
SB0265VGL_bridger_k30_13266	5.26	2.85	NonToxin	NonToxin	ENSPVIG00000006101|ENSPVIP00000007468|CRYAB CRYAB crystallin alpha B [Source:NCBI gene;Acc:110078645]
SB0265VGL_bridger_k30_13350	4.56	1.64	NonToxin	Uncharacterized	Uncharacterized
SB0265VGL_bridger_k30_13361	4.4	8	NonToxin	NonToxin	GBSH01003008|Boiga_irregularis Ubiquitin-conjugating enzyme E2 J2-like
SB0265VGL_bridger_k30_134	41.59	41.67	NonToxin	NonToxin	GBEX01002596|Crotalus_adamanteus prelamin-A/C
SB0265VGL_bridger_k30_13406	5.19	14.41	NonToxin	NonToxin	GAAZ01000415|Crotalus_horridus cAMP-regulated phosphoprotein 19
SB0265VGL_bridger_k30_13413	6.99	19.14	NonToxin	NonToxin	mannosidase, beta A, lysosomal-like
SB0265VGL_bridger_k30_1346	39.48	109.58	NonToxin	NonToxin	GDAY02000876|Agkistrodon_contortrix_contortrix Fructose-1,6-bisphosphatase 1-like protein
SB0265VGL_bridger_k30_13463	9.12	35.18	NonToxin	NonToxin	GBEX01001281|Crotalus_adamanteus CDGSH iron-sulfur domain-containing protein
SB0265VGL_bridger_k30_13499	4.13	14.62	NonToxin	NonToxin	ENSPVIG00000017931|ENSPVIP00000023745|RPL3L RPL3L ribosomal protein L3 like [Source:NCBI gene;Acc:110090441]
SB0265VGL_bridger_k30_13519	6.53	9.31	NonToxin	NonToxin	GAAZ01001974|Crotalus_horridus Ras-related protein Rab-11A
SB0265VGL_bridger_k30_13537	2.32	4.29	NonToxin	Uncharacterized	Uncharacterized
SB0265VGL_bridger_k30_13573	4.13	10.13	NonToxin	NonToxin	GDAY02001138|Agkistrodon_contortrix_contortrix hypothetical protein
SB0265VGL_bridger_k30_13578	5.07	10.77	NonToxin	NonToxin	ADP-ribosylation factor-like 13B
SB0265VGL_bridger_k30_1360	323.33	584.05	NonToxin	NonToxin	GDAY02000160|Agkistrodon_contortrix_contortrix Annexin A2-like protein
SB0265VGL_bridger_k30_13625	4.53	10.9	NonToxin	NonToxin	ENSNSUP00000003547,1|CASP7 CASP7 caspase 7 [Source:HGNC Symbol;Acc:HGNC:1508]
SB0265VGL_bridger_k30_1365	239.77	331.83	NonToxin	NonToxin	GBSH01001710|Boiga_irregularis myosin light polypeptide 6
SB0265VGL_bridger_k30_1368	270.4	567.88	NonToxin	NonToxin	ENSACAG00000012136|ENSACAP00000011917|PTMA PTMA prothymosin alpha [Source:NCBI gene;Acc:100564806]
SB0265VGL_bridger_k30_13684	2.72	2.62	NonToxin	NonToxin	GAAZ01002111|Crotalus_horridus Putative DNA directed RNA polymerase II
SB0265VGL_bridger_k30_13712	6.02	47.28	NonToxin	Uncharacterized	Uncharacterized
SB0265VGL_bridger_k30_13774	4.06	7.52	NonToxin	NonToxin	ENSNSUP00000009306,1|EXOSC5 EXOSC5 exosome component 5 [Source:HGNC Symbol;Acc:HGNC:24662]
SB0265VGL_bridger_k30_13782	6.98	5.52	NonToxin	Uncharacterized	Uncharacterized
SB0265VGL_bridger_k30_13806	3.17	9.12	NonToxin	NonToxin	ENSACAG00000010455|ENSACAP00000010247|SKAP2 SKAP2 src kinase associated phosphoprotein 2 [Source:NCBI gene;Acc:100552146]
SB0265VGL_bridger_k30_13808	3.77	24.68	NonToxin	NonToxin	GAAZ01000080|Crotalus_horridus Adenosylhomocysteinase A-like protein
SB0265VGL_bridger_k30_13951	7.62	15.43	NonToxin	NonToxin	ENSPVIG00000022136|ENSPVIP00000030049|PTPMT1 PTPMT1 protein tyrosine phosphatase mitochondrial 1 [Source:NCBI gene;Acc:110082256]
SB0265VGL_bridger_k30_1398	243.12	326.1	NonToxin	Uncharacterized	Uncharacterized
SB0265VGL_bridger_k30_1399	230.25	69.23	NonToxin	Uncharacterized	Uncharacterized
SB0265VGL_bridger_k30_1404	285.02	261.65	NonToxin	NonToxin	GAAZ01001991|Crotalus_horridus rab GDP dissociation inhibitor beta
SB0265VGL_bridger_k30_14108	3.37	5.48	NonToxin	NonToxin	tyrosine aminotransferase
SB0265VGL_bridger_k30_14112	4.42	7.6	NonToxin	NonToxin	GDAY02000322|Agkistrodon_contortrix_contortrix putative C1orf172-like protein
SB0265VGL_bridger_k30_14172	3.19	14.03	NonToxin	NonToxin	ENSNSUP00000006839,1|SLC17A5 SLC17A5 solute carrier family 17 member 5 [Source:HGNC Symbol;Acc:HGNC:10933]
SB0265VGL_bridger_k30_1418	88.36	294.55	NonToxin	NonToxin	ENSNSUP00000024853,1|ERO1B ERO1B endoplasmic reticulum oxidoreductase 1 beta [Source:HGNC Symbol;Acc:HGNC:14355]
SB0265VGL_bridger_k30_1420	247.19	362.42	NonToxin	NonToxin	GAAZ01000134|Crotalus_horridus Alpha-enolase
SB0265VGL_bridger_k30_14217	5.32	32.06	NonToxin	NonToxin	ENSNSUP00000017844,1
SB0265VGL_bridger_k30_1422	9.27	20.18	NonToxin	Uncharacterized	Uncharacterized
SB0265VGL_bridger_k30_14227	3.04	8.18	NonToxin	Uncharacterized	Uncharacterized
SB0265VGL_bridger_k30_14243	4.51	17.51	NonToxin	NonToxin	GBEX01003542|Crotalus_adamanteus transcription initiation factor IIB
SB0265VGL_bridger_k30_14275	5.52	23.78	NonToxin	NonToxin	GDAY02000427|Agkistrodon_contortrix_contortrix coiled-coil domain containing 75
SB0265VGL_bridger_k30_14295	5.54	5.5	NonToxin	Uncharacterized	Uncharacterized
SB0265VGL_bridger_k30_14342	8.12	28.66	NonToxin	NonToxin	GDAY02001488|Agkistrodon_contortrix_contortrix 28S ribosomal protein S7, mitochondrial
SB0265VGL_bridger_k30_14357	6.3	38.17	NonToxin	NonToxin	GBEX01000487|Crotalus_adamanteus UPF0534 C4orf43-like protein
SB0265VGL_bridger_k30_1437	9.7	50.34	NonToxin	Uncharacterized	Uncharacterized
SB0265VGL_bridger_k30_14372	2.88	13.83	NonToxin	NonToxin	ENSNSUP00000012550,1|RNMT RNMT RNA guanine-7 methyltransferase [Source:HGNC Symbol;Acc:HGNC:10075]
SB0265VGL_bridger_k30_14377	3.6	13.26	NonToxin	NonToxin	|ENSACAG00000013166|ENSACAP00000012937| ISY1 splicing factor homolog [Source:NCBI gene;Acc:100558005]
SB0265VGL_bridger_k30_1449	289.62	741.6	NonToxin	NonToxin	GBEW01000868|Micrurus_fulvius 60S ribosomal protein L40
SB0265VGL_bridger_k30_14535	6.29	9.29	NonToxin	NonToxin	GBEX01002720|Crotalus_adamanteus ras-related protein Rab-40C
SB0265VGL_bridger_k30_14550	2.72	31.63	NonToxin	NonToxin	GBEW01001044|Micrurus_fulvius LIM domain transcription factor LMO4-like
SB0265VGL_bridger_k30_14600	4.94	27.76	NonToxin	Uncharacterized	Uncharacterized
SB0265VGL_bridger_k30_14630	3.14	1.31	NonToxin	Uncharacterized	Uncharacterized
SB0265VGL_bridger_k30_14639	8.1	3.68	NonToxin	Uncharacterized	Uncharacterized
SB0265VGL_bridger_k30_14647	4.79	16.33	NonToxin	NonToxin	GAAZ01002605|Crotalus_horridus TIMELESS-interacting protein
SB0265VGL_bridger_k30_14667	4.31	18.05	NonToxin	Uncharacterized	Uncharacterized
SB0265VGL_bridger_k30_1469	200.69	233.78	NonToxin	Uncharacterized	Uncharacterized
SB0265VGL_bridger_k30_1475	51.61	118.17	NonToxin	NonToxin	GDAY02000049|Agkistrodon_contortrix_contortrix Actin-related protein 2/3 complex subunit 2-like
SB0265VGL_bridger_k30_1478	282.47	821.82	NonToxin	NonToxin	GAAZ01000231|Crotalus_horridus ATPase, H+ transporting, lysosomal 13kDa, V1
SB0265VGL_bridger_k30_14860	6.47	8.38	NonToxin	NonToxin	GBSH01001531|Boiga_irregularis mitotic spindle assembly checkpoint protein
SB0265VGL_bridger_k30_14983	3.88	13.46	NonToxin	Uncharacterized	Uncharacterized
SB0265VGL_bridger_k30_1504	203.33	98.24	NonToxin	NonToxin	GAAZ01002455|Crotalus_horridus Sugar transporter SWEET1-like protein
SB0265VGL_bridger_k30_15065	2.78	8.8	NonToxin	NonToxin	vesicle amine transport 1-like
SB0265VGL_bridger_k30_15116	5.79	23.13	NonToxin	NonToxin	ENSPVIG00000020143|ENSPVIP00000027076|IFT43 IFT43 intraflagellar transport 43 [Source:NCBI gene;Acc:110079122]
SB0265VGL_bridger_k30_1513	96.43	185.19	NonToxin	NonToxin	GBSH01002624|Boiga_irregularis stearoyl-CoA desaturase-1
SB0265VGL_bridger_k30_15137	4.01	18.03	NonToxin	NonToxin	GBSI01001162|Hypsiglena_sp,_JMG-2014 inhibitor of growth protein 3
SB0265VGL_bridger_k30_1515	209.46	182.3	NonToxin	NonToxin	GDAY02001814|Agkistrodon_contortrix_contortrix Polyadenylate-binding protein-interacting
SB0265VGL_bridger_k30_1516	234.17	157.92	NonToxin	NonToxin	ENSNSUP00000029048,1
SB0265VGL_bridger_k30_1517	254.11	116.13	NonToxin	NonToxin	GDAY02002016|Agkistrodon_contortrix_contortrix Ribonuclease kappa
SB0265VGL_bridger_k30_1519	242.89	169.97	NonToxin	NonToxin	GAAZ01001502|Crotalus_horridus 28S ribosomal protein S21, mitochondrial
SB0265VGL_bridger_k30_15218	5.62	10.65	NonToxin	Uncharacterized	Uncharacterized
SB0265VGL_bridger_k30_15261	5.54	14.93	NonToxin	NonToxin	ENSNSUP00000010534,1
SB0265VGL_bridger_k30_15293	5.4	7.6	NonToxin	Uncharacterized	Uncharacterized
SB0265VGL_bridger_k30_15315	3.67	10.54	NonToxin	Uncharacterized	Uncharacterized
SB0265VGL_bridger_k30_1541	162.95	260.71	NonToxin	NonToxin	GBEW01000046|Micrurus_fulvius ADP-ribosylation factor 4-like protein
SB0265VGL_bridger_k30_1542	215.33	372.13	NonToxin	NonToxin	GBEX01000316|Crotalus_adamanteus ATP synthase subunit beta, mitochondrial-like
SB0265VGL_bridger_k30_15463	2.91	24.21	NonToxin	Uncharacterized	Uncharacterized
SB0265VGL_bridger_k30_1548	174.7	427.09	NonToxin	Uncharacterized	Uncharacterized
SB0265VGL_bridger_k30_15525	5.15	20.64	NonToxin	Uncharacterized	Uncharacterized
SB0265VGL_bridger_k30_15579	3.2	14.97	NonToxin	Uncharacterized	Uncharacterized
SB0265VGL_bridger_k30_1565	262.13	274.87	NonToxin	NonToxin	GDAY02001977|Agkistrodon_contortrix_contortrix hypothetical protein
SB0265VGL_bridger_k30_1566	156.18	180.07	NonToxin	NonToxin	GAAZ01000232|Crotalus_horridus ATP-binding cassette sub-family F member 2
SB0265VGL_bridger_k30_15733	3.65	4.5	NonToxin	NonToxin	ENSPVIG00000010739|ENSPVIP00000013885|HVCN1 HVCN1 hydrogen voltage gated channel 1 [Source:NCBI gene;Acc:110083846]
SB0265VGL_bridger_k30_15792	4.57	5.16	NonToxin	Uncharacterized	Uncharacterized
SB0265VGL_bridger_k30_15817	6.07	7.55	NonToxin	Uncharacterized	Uncharacterized
SB0265VGL_bridger_k30_15876	4.54	5.45	NonToxin	Uncharacterized	Uncharacterized
SB0265VGL_bridger_k30_15977	4.69	16.33	NonToxin	NonToxin	GDAY02001201|Agkistrodon_contortrix_contortrix kelch domain-containing protein 2-like protein
SB0265VGL_bridger_k30_15993	4.29	16.71	NonToxin	NonToxin	GBEX01001957|Crotalus_adamanteus methyltransferase-like protein 21A-like
SB0265VGL_bridger_k30_16003	3.76	15.69	NonToxin	NonToxin	protein phosphatase, Mg2+/Mn2+ dependent, 1G
SB0265VGL_bridger_k30_1603	313.13	1491.07	NonToxin	NonToxin	GAAZ01002130|Crotalus_horridus 60S ribosomal protein L11
SB0265VGL_bridger_k30_16050	3.33	6.46	NonToxin	Uncharacterized	Uncharacterized
SB0265VGL_bridger_k30_16230	2.92	14.03	NonToxin	NonToxin	ENSNSUP00000021684,1
SB0265VGL_bridger_k30_1630	183.82	247.29	NonToxin	NonToxin	GBEX01002639|Crotalus_adamanteus proteasome subunit beta type-7
SB0265VGL_bridger_k30_16373	4.05	22.13	NonToxin	Uncharacterized	Uncharacterized
SB0265VGL_bridger_k30_1638	158.09	205.7	NonToxin	NonToxin	GDAY02001241|Agkistrodon_contortrix_contortrix putative mitochondrial ribosomal protein L28
SB0265VGL_bridger_k30_16391	4.24	3.42	NonToxin	Uncharacterized	Uncharacterized
SB0265VGL_bridger_k30_1642	113.32	290.65	NonToxin	NonToxin	GBEX01003620|Crotalus_adamanteus Transmembrane protein 49
SB0265VGL_bridger_k30_16506	4.8	4.12	NonToxin	Uncharacterized	Uncharacterized
SB0265VGL_bridger_k30_16511	4.35	9.04	NonToxin	Uncharacterized	Uncharacterized
SB0265VGL_bridger_k30_16516	2.17	12.24	NonToxin	NonToxin	ENSNSUP00000020229,1|CCN5 CCN5 cellular communication network factor 5 [Source:HGNC Symbol;Acc:HGNC:12770]
SB0265VGL_bridger_k30_16635	2.74	8.66	NonToxin	Uncharacterized	Uncharacterized
SB0265VGL_bridger_k30_16685	1.5	8.95	NonToxin	Uncharacterized	Uncharacterized
SB0265VGL_bridger_k30_16701	4.55	51.41	NonToxin	Uncharacterized	Uncharacterized
SB0265VGL_bridger_k30_16736	3.58	8.55	NonToxin	Uncharacterized	Uncharacterized
SB0265VGL_bridger_k30_1686	21.54	39.68	NonToxin	NonToxin	GDAY02001192|Agkistrodon_contortrix_contortrix Protein jagunal 1-like protein
SB0265VGL_bridger_k30_1689	14.51	10.9	NonToxin	NonToxin	RNA polymerase II associated protein 3
SB0265VGL_bridger_k30_16975	4.93	8.04	NonToxin	Uncharacterized	Uncharacterized
SB0265VGL_bridger_k30_1700	56.8	67.08	NonToxin	NonToxin	GAAZ01000451|Crotalus_horridus Cathepsin D
SB0265VGL_bridger_k30_1709	110.72	184.21	NonToxin	NonToxin	GDAY02000601|Agkistrodon_contortrix_contortrix Cytochrome b-c1 complex subunit 6, mitochondrial
SB0265VGL_bridger_k30_17095	3.16	2.56	NonToxin	Uncharacterized	Uncharacterized
SB0265VGL_bridger_k30_17109	5.86	16.07	NonToxin	Uncharacterized	Uncharacterized
SB0265VGL_bridger_k30_1716	244.59	99.77	NonToxin	NonToxin	GAAZ01001556|Crotalus_horridus NADH dehydrogenase (ubiquinone) 1 beta
SB0265VGL_bridger_k30_1717	211.12	97.05	NonToxin	NonToxin	GAAZ01000954|Crotalus_horridus Guanine nucleotide-binding protein
SB0265VGL_bridger_k30_1719	31.39	83.96	NonToxin	Uncharacterized	Uncharacterized
SB0265VGL_bridger_k30_17219	5.35	1.77	NonToxin	Uncharacterized	Uncharacterized
SB0265VGL_bridger_k30_173	30.12	40.06	NonToxin	NonToxin	GAAZ01000689|Crotalus_horridus NADPH-dependent diflavin oxidoreductase 1
SB0265VGL_bridger_k30_17365	1.39	9.62	NonToxin	Uncharacterized	Uncharacterized
SB0265VGL_bridger_k30_17514	2.04	9.62	NonToxin	NonToxin	suppressor of var1, 3-like 1 (S, cerevisiae)
SB0265VGL_bridger_k30_1752	168.31	55.53	NonToxin	NonToxin	GBEX01001379|Crotalus_adamanteus Glutamate (NMDA) receptor-associated protein
SB0265VGL_bridger_k30_17737	4.32	9.92	NonToxin	Uncharacterized	Uncharacterized
SB0265VGL_bridger_k30_1779	130.64	114.72	NonToxin	NonToxin	GBSH01001732|Boiga_irregularis NADH dehydrogenase 1 subunit c2
SB0265VGL_bridger_k30_17840	3.37	13.88	NonToxin	NonToxin	GBEX01003763|Crotalus_adamanteus D-tyrosyl-tRNA(Tyr) deacylase 2
SB0265VGL_bridger_k30_1790	101.82	320.52	NonToxin	NonToxin	GDAY02000641|Agkistrodon_contortrix_contortrix Dolichyl-diphosphooligosaccharide--protein
SB0265VGL_bridger_k30_1795	164.16	113.5	NonToxin	NonToxin	ENSNSUP00000020250,1|ATP5F1D ATP5F1D ATP synthase F1 subunit delta [Source:HGNC Symbol;Acc:HGNC:837]
SB0265VGL_bridger_k30_1800	100.93	53.99	NonToxin	NonToxin	GBEX01002778|Crotalus_adamanteus Regulation of nuclear pre-mRNA domain-containing
SB0265VGL_bridger_k30_1801	262.81	359.59	NonToxin	NonToxin	GAAZ01000623|Crotalus_horridus Cystatin-B-like protein
SB0265VGL_bridger_k30_1802	125.86	52.62	NonToxin	NonToxin	ring finger protein 182
SB0265VGL_bridger_k30_1806	30.18	17.18	NonToxin	NonToxin	ENSNSUP00000009015,1|ISG20L2 ISG20L2 interferon stimulated exonuclease gene 20 like 2 [Source:HGNC Symbol;Acc:HGNC:25745]
SB0265VGL_bridger_k30_18170	1.79	1.44	NonToxin	NonToxin	GDAY02000913|Agkistrodon_contortrix_contortrix glucose-6-phosphatase catalytic subunit-related
SB0265VGL_bridger_k30_1822	179.98	99.1	NonToxin	NonToxin	ENSPVIG00000011331|ENSPVIP00000016069|ENO3 ENO3 enolase 3 [Source:NCBI gene;Acc:110082386]
SB0265VGL_bridger_k30_18252	3.33	4.4	NonToxin	Uncharacterized	Uncharacterized
SB0265VGL_bridger_k30_1836	161.87	150.12	NonToxin	NonToxin	GAAZ01001755|Crotalus_horridus Peroxiredoxin-5, mitochondrial-like protein
SB0265VGL_bridger_k30_18360	4.67	8.33	NonToxin	NonToxin	GAAZ01000966|Crotalus_horridus glia maturation factor beta
SB0265VGL_bridger_k30_18381	2.47	6.65	NonToxin	NonToxin	GBEX01003957|Crotalus_adamanteus vitamin K epoxide reductase complex subunit
SB0265VGL_bridger_k30_1839	155.5	298.19	NonToxin	NonToxin	GAAZ01000712|Crotalus_horridus DnaJ subfamily B member 11-like protein
SB0265VGL_bridger_k30_1841	120.27	115.59	NonToxin	NonToxin	GAAZ01001584|Crotalus_horridus Protein NDRG2-like protein
SB0265VGL_bridger_k30_1844	182.75	204.68	NonToxin	NonToxin	GBEX01002160|Crotalus_adamanteus NADH dehydrogenase (ubiquinone) 1 beta
SB0265VGL_bridger_k30_18516	1.07	3.38	NonToxin	Uncharacterized	Uncharacterized
SB0265VGL_bridger_k30_18517	5.13	19.85	NonToxin	Uncharacterized	Uncharacterized
SB0265VGL_bridger_k30_18587	3.09	5.66	NonToxin	NonToxin	GAAZ01002123|Crotalus_horridus Rogdi-like protein
SB0265VGL_bridger_k30_1868	119.06	108.21	NonToxin	NonToxin	matrix metallopeptidase 2
SB0265VGL_bridger_k30_18742	2.11	2.08	NonToxin	Uncharacterized	Uncharacterized
SB0265VGL_bridger_k30_18782	1.67	5.8	NonToxin	Uncharacterized	Uncharacterized
SB0265VGL_bridger_k30_1881	40.87	111.77	NonToxin	NonToxin	GAAZ01000788|Crotalus_horridus Transmembrane emp24 domain-containing protein
SB0265VGL_bridger_k30_1890	86.19	161.29	NonToxin	NonToxin	GBEX01002840|Crotalus_adamanteus RING finger protein 10
SB0265VGL_bridger_k30_1899	128.01	110.08	NonToxin	NonToxin	GBSH01001752|Boiga_irregularis NADH dehydrogenase [ubiquinone] flavoprotein
SB0265VGL_bridger_k30_19015	3.29	7.53	NonToxin	Uncharacterized	Uncharacterized
SB0265VGL_bridger_k30_19053	3.34	4.46	NonToxin	Uncharacterized	Uncharacterized
SB0265VGL_bridger_k30_19222	2.33	7.33	NonToxin	Uncharacterized	Uncharacterized
SB0265VGL_bridger_k30_19287	2.98	19.28	NonToxin	Uncharacterized	Uncharacterized
SB0265VGL_bridger_k30_19350	7.13	3.98	NonToxin	NonToxin	ENSPVIG00000009365|ENSPVIP00000011949
SB0265VGL_bridger_k30_1940	65.08	41.43	NonToxin	NonToxin	GDAY02002738|Agkistrodon_contortrix_contortrix TSC-22-like protein
SB0265VGL_bridger_k30_19460	2.12	4.68	NonToxin	NonToxin	protein phosphatase 2, regulatory subunit B'', gamma
SB0265VGL_bridger_k30_19523	1.57	3.11	NonToxin	Uncharacterized	Uncharacterized
SB0265VGL_bridger_k30_19581	2.13	5.27	NonToxin	Uncharacterized	Uncharacterized
SB0265VGL_bridger_k30_1960	51.99	44.67	NonToxin	NonToxin	GDAY02001593|Agkistrodon_contortrix_contortrix NFkB interacting protein 1-like
SB0265VGL_bridger_k30_19654	1.08	5.05	NonToxin	NonToxin	XK, Kell blood group complex subunit-related family, member 9
SB0265VGL_bridger_k30_19703	3.51	7.17	NonToxin	NonToxin	ENSNSUP00000005026,1
SB0265VGL_bridger_k30_19712	4.47	7.26	NonToxin	Uncharacterized	Uncharacterized
SB0265VGL_bridger_k30_19730	3.57	6.32	NonToxin	Uncharacterized	Uncharacterized
SB0265VGL_bridger_k30_19781	1.8	12.17	NonToxin	NonToxin	GBSH01001691|Boiga_irregularis normal mucosa of esophagus-specific1 protein
SB0265VGL_bridger_k30_1982	227.18	322.96	NonToxin	Uncharacterized	Uncharacterized
SB0265VGL_bridger_k30_1989	53.39	3.52	NonToxin	NonToxin	GBSH01001607|Boiga_irregularis MHC class II antigen
SB0265VGL_bridger_k30_19960	7.02	6.82	NonToxin	Uncharacterized	Uncharacterized
SB0265VGL_bridger_k30_20051	1.91	1.97	NonToxin	Uncharacterized	Uncharacterized
SB0265VGL_bridger_k30_2015	157.49	296.3	NonToxin	NonToxin	GAAZ01000242|Crotalus_horridus ATP synthase subunit g, mitochondrial-like
SB0265VGL_bridger_k30_20170	2.38	11.7	NonToxin	Uncharacterized	Uncharacterized
SB0265VGL_bridger_k30_2018	94.76	211.08	NonToxin	NonToxin	GAAZ01002576|Crotalus_horridus Eukaryotic translation initiation factor 3
SB0265VGL_bridger_k30_20292	2.88	4.64	NonToxin	Uncharacterized	Uncharacterized
SB0265VGL_bridger_k30_20393	3.14	1.05	NonToxin	NonToxin	ENSNSUP00000016308,1|DNALI1 DNALI1 dynein axonemal light intermediate chain 1 [Source:HGNC Symbol;Acc:HGNC:14353]
SB0265VGL_bridger_k30_20407	2.63	3.21	NonToxin	Uncharacterized	Uncharacterized
SB0265VGL_bridger_k30_2043	159.11	203.35	NonToxin	NonToxin	GBEX01000325|Crotalus_adamanteus ATP synthase lipid-binding protein,
SB0265VGL_bridger_k30_2050	39.91	41.9	NonToxin	Uncharacterized	Uncharacterized
SB0265VGL_bridger_k30_20522	1.51	9	NonToxin	Uncharacterized	Uncharacterized
SB0265VGL_bridger_k30_20564	1.39	4.81	NonToxin	Uncharacterized	Uncharacterized
SB0265VGL_bridger_k30_20580	3.53	1.49	NonToxin	Uncharacterized	Uncharacterized
SB0265VGL_bridger_k30_2062	101.91	123.65	NonToxin	NonToxin	ENSNSUP00000010164,1
SB0265VGL_bridger_k30_20706	2.25	11.32	NonToxin	Uncharacterized	Uncharacterized
SB0265VGL_bridger_k30_20710	1.91	2.09	NonToxin	Uncharacterized	Uncharacterized
SB0265VGL_bridger_k30_20818	3.23	7.62	NonToxin	NonToxin	mitogen-activated protein kinase kinase kinase 19
SB0265VGL_bridger_k30_20957	2.01	4.05	NonToxin	NonToxin	tetratricopeptide repeat domain 8
SB0265VGL_bridger_k30_2096	154.39	135.44	NonToxin	NonToxin	GAAZ01001924|Crotalus_horridus 26S proteasome non-ATPase regulatory subunit
SB0265VGL_bridger_k30_20973	1.71	2.78	NonToxin	Uncharacterized	Uncharacterized
SB0265VGL_bridger_k30_21050	2.07	7.51	NonToxin	Uncharacterized	Uncharacterized
SB0265VGL_bridger_k30_2112	75.25	65.78	NonToxin	NonToxin	GBEW01000734|Micrurus_fulvius Profilin-2-like protein
SB0265VGL_bridger_k30_2115	107.9	332.79	NonToxin	NonToxin	GAAZ01001756|Crotalus_horridus Peroxiredoxin-6-like protein
SB0265VGL_bridger_k30_2133	53.01	104.04	NonToxin	Uncharacterized	Uncharacterized
SB0265VGL_bridger_k30_21372	4.1	6.77	NonToxin	Uncharacterized	Uncharacterized
SB0265VGL_bridger_k30_2139	72.75	206.29	NonToxin	NonToxin	GBEW01000435|Micrurus_fulvius histone H3,3
SB0265VGL_bridger_k30_2144	31.81	54.87	NonToxin	NonToxin	GBEW01000949|Micrurus_fulvius Serine/threonine-protein phosphatase PP1-beta
SB0265VGL_bridger_k30_21443	1.6	10.72	NonToxin	Uncharacterized	Uncharacterized
SB0265VGL_bridger_k30_2147	66.56	50.67	NonToxin	NonToxin	GAAZ01000488|Crotalus_horridus Cell cycle control protein 50B-like protein
SB0265VGL_bridger_k30_21482	3.01	6.63	NonToxin	Uncharacterized	Uncharacterized
SB0265VGL_bridger_k30_2151	11.15	68.3	NonToxin	NonToxin	ENSNSUP00000007785,1|TMEM123 TMEM123 transmembrane protein 123 [Source:HGNC Symbol;Acc:HGNC:30138]
SB0265VGL_bridger_k30_2158	141.63	128.66	NonToxin	NonToxin	GBEX01000084|Crotalus_adamanteus Acyl-CoA-binding protein-like protein
SB0265VGL_bridger_k30_2159	48.74	331.57	NonToxin	NonToxin	GAAZ01000201|Crotalus_horridus Aquaporin-5-like protein
SB0265VGL_bridger_k30_21636	3.39	8.95	NonToxin	Uncharacterized	Uncharacterized
SB0265VGL_bridger_k30_21687	2.47	2.42	NonToxin	NonToxin	CKLF-like MARVEL transmembrane domain containing 4
SB0265VGL_bridger_k30_2177	49.84	54.4	NonToxin	NonToxin	GBEX01003086|Crotalus_adamanteus Sequestosome-1
SB0265VGL_bridger_k30_21794	2.87	14.21	NonToxin	Uncharacterized	Uncharacterized
SB0265VGL_bridger_k30_2186	31.62	7.69	NonToxin	NonToxin	ENSPVIG00000017126|ENSPVIP00000022697|PIGS PIGS phosphatidylinositol glycan anchor biosynthesis class S [Source:NCBI gene;Acc:110084284]
SB0265VGL_bridger_k30_2190	97.33	106.79	NonToxin	NonToxin	GDAY02000206|Agkistrodon_contortrix_contortrix Aspartate aminotransferase, mitochondrial-like
SB0265VGL_bridger_k30_2191	118.98	81.36	NonToxin	Uncharacterized	Uncharacterized
SB0265VGL_bridger_k30_2196	151.29	100.59	NonToxin	NonToxin	GBEW01001192|Micrurus_fulvius UPF0139 membrane protein C19orf56
SB0265VGL_bridger_k30_2197	95.74	16.37	NonToxin	NonToxin	sushi-repeat containing protein, X-linked
SB0265VGL_bridger_k30_22067	3.46	8.6	NonToxin	Uncharacterized	Uncharacterized
SB0265VGL_bridger_k30_22093	1.52	1.69	NonToxin	Uncharacterized	Uncharacterized
SB0265VGL_bridger_k30_2214	113.4	102.39	NonToxin	NonToxin	GBEX01001496|Crotalus_adamanteus Hematological and neurological expressed 1
SB0265VGL_bridger_k30_222	7103.88	3633.58	NonToxin	NonToxin	GDAY02000552|Agkistrodon_contortrix_contortrix Creatine kinase
SB0265VGL_bridger_k30_2234	107.7	65.86	NonToxin	Uncharacterized	Uncharacterized
SB0265VGL_bridger_k30_2235	106.19	84.8	NonToxin	NonToxin	GBEW01000189|Micrurus_fulvius Capping protein beta subunit
SB0265VGL_bridger_k30_2240	58.9	68.81	NonToxin	NonToxin	GDAY02001180|Agkistrodon_contortrix_contortrix Isopentenyl-diphosphate Delta-isomerase 1-like
SB0265VGL_bridger_k30_22453	1.74	2.19	NonToxin	Uncharacterized	Uncharacterized
SB0265VGL_bridger_k30_22503	1.86	3.06	NonToxin	NonToxin	fat storage-inducing transmembrane protein 2
SB0265VGL_bridger_k30_22564	2.05	8.37	NonToxin	Uncharacterized	Uncharacterized
SB0265VGL_bridger_k30_22584	2.72	9.03	NonToxin	Uncharacterized	Uncharacterized
SB0265VGL_bridger_k30_227	438.85	1810.44	NonToxin	NonToxin	GDAY02002571|Agkistrodon_contortrix_contortrix Thioredoxin
SB0265VGL_bridger_k30_22712	1.95	10.25	NonToxin	Uncharacterized	Uncharacterized
SB0265VGL_bridger_k30_22740	3.44	4.56	NonToxin	Uncharacterized	Uncharacterized
SB0265VGL_bridger_k30_22800	2.34	10.09	NonToxin	Uncharacterized	Uncharacterized
SB0265VGL_bridger_k30_2284	121.87	119.68	NonToxin	NonToxin	GDAY02002505|Agkistrodon_contortrix_contortrix T-complex protein 1 subunit eta
SB0265VGL_bridger_k30_22874	3.37	8.07	NonToxin	Uncharacterized	Uncharacterized
SB0265VGL_bridger_k30_22876	2.52	15.42	NonToxin	Uncharacterized	Uncharacterized
SB0265VGL_bridger_k30_22917	1.28	10.26	NonToxin	Uncharacterized	Uncharacterized
SB0265VGL_bridger_k30_22976	1.72	4.14	NonToxin	Uncharacterized	Uncharacterized
SB0265VGL_bridger_k30_2298	103.73	178.95	NonToxin	NonToxin	GDAY02000987|Agkistrodon_contortrix_contortrix hypothetical protein
SB0265VGL_bridger_k30_2312	76.34	35.41	NonToxin	NonToxin	TAF5 RNA polymerase II, TATA box binding protein (TBP)-associated factor, 100kDa
SB0265VGL_bridger_k30_23167	3.28	3.55	NonToxin	Uncharacterized	Uncharacterized
SB0265VGL_bridger_k30_2318	95.13	97.42	NonToxin	NonToxin	GDAY02001529|Agkistrodon_contortrix_contortrix NADH dehydrogenase (ubiquinone) 1 alpha
SB0265VGL_bridger_k30_23200	2.1	14.39	NonToxin	Uncharacterized	Uncharacterized
SB0265VGL_bridger_k30_23201	2.17	14.25	NonToxin	Uncharacterized	Uncharacterized
SB0265VGL_bridger_k30_2321	85.64	61.49	NonToxin	NonToxin	GBSH01002102|Boiga_irregularis 26S proteasome non-ATPase regulatory subunit
SB0265VGL_bridger_k30_2325	84.34	113.87	NonToxin	NonToxin	GAAZ01002451|Crotalus_horridus Surfeit locus protein 4-like protein
SB0265VGL_bridger_k30_2330	11.03	14.31	NonToxin	NonToxin	ENSACAG00000012101|ENSACAP00000011867|PDE6D PDE6D phosphodiesterase 6D [Source:NCBI gene;Acc:100564605]
SB0265VGL_bridger_k30_23304	2.95	15.58	NonToxin	Uncharacterized	Uncharacterized
SB0265VGL_bridger_k30_23336	2.87	3.84	NonToxin	Uncharacterized	Uncharacterized
SB0265VGL_bridger_k30_23359	1.81	1.46	NonToxin	Uncharacterized	Uncharacterized
SB0265VGL_bridger_k30_23380	2.52	2.86	NonToxin	Uncharacterized	Uncharacterized
SB0265VGL_bridger_k30_23406	2.66	2.42	NonToxin	Uncharacterized	Uncharacterized
SB0265VGL_bridger_k30_23485	3.18	8.35	NonToxin	Uncharacterized	Uncharacterized
SB0265VGL_bridger_k30_23568	3.75	6.03	NonToxin	Uncharacterized	Uncharacterized
SB0265VGL_bridger_k30_23594	5.73	4.95	NonToxin	Uncharacterized	Uncharacterized
SB0265VGL_bridger_k30_23600	12.96	9.1	NonToxin	Uncharacterized	Uncharacterized
SB0265VGL_bridger_k30_23831	1.75	5.59	NonToxin	Uncharacterized	Uncharacterized
SB0265VGL_bridger_k30_23844	3.39	1.35	NonToxin	Uncharacterized	Uncharacterized
SB0265VGL_bridger_k30_2391	89.67	385.64	NonToxin	NonToxin	GAAZ01000122|Crotalus_horridus Aldehyde dehydrogenase 2 family (mitochondrial)
SB0265VGL_bridger_k30_23931	1.33	14.14	NonToxin	Uncharacterized	Uncharacterized
SB0265VGL_bridger_k30_23938	1.86	7.47	NonToxin	Uncharacterized	Uncharacterized
SB0265VGL_bridger_k30_2394	68.67	49.34	NonToxin	NonToxin	GDAY02001956|Agkistrodon_contortrix_contortrix RAC-beta serine/threonine-protein kinase
SB0265VGL_bridger_k30_2408	102	225.45	NonToxin	Uncharacterized	Uncharacterized
SB0265VGL_bridger_k30_24280	8.3	20.33	NonToxin	Uncharacterized	Uncharacterized
SB0265VGL_bridger_k30_2435	111.67	186.09	NonToxin	NonToxin	GDAY02002002|Agkistrodon_contortrix_contortrix rho GDP-dissociation inhibitor 1-like protein
SB0265VGL_bridger_k30_2439	103.6	229.34	NonToxin	Uncharacterized	Uncharacterized
SB0265VGL_bridger_k30_24401	1.46	2.91	NonToxin	NonToxin	regulator of chromosome condensation 1
SB0265VGL_bridger_k30_24482	2.73	9.23	NonToxin	Uncharacterized	Uncharacterized
SB0265VGL_bridger_k30_2452	162.47	185.48	NonToxin	NonToxin	GDAY02001533|Agkistrodon_contortrix_contortrix NADH dehydrogenase (ubiquinone) 1 alpha
SB0265VGL_bridger_k30_2455	60.5	37.21	NonToxin	NonToxin	KIAA2013
SB0265VGL_bridger_k30_24556	1.93	5.52	NonToxin	Uncharacterized	Uncharacterized
SB0265VGL_bridger_k30_24602	3.41	5.65	NonToxin	Uncharacterized	Uncharacterized
SB0265VGL_bridger_k30_2464	81.24	114.17	NonToxin	NonToxin	GAAZ01000764|Crotalus_horridus Transcription elongation factor B polypeptide
SB0265VGL_bridger_k30_24729	1.42	1.52	NonToxin	Uncharacterized	Uncharacterized
SB0265VGL_bridger_k30_24802	3	4.85	NonToxin	Uncharacterized	Uncharacterized
SB0265VGL_bridger_k30_24819	3.13	2.05	NonToxin	Uncharacterized	Uncharacterized
SB0265VGL_bridger_k30_2482	107.39	395.17	NonToxin	NonToxin	GDAY02000628|Agkistrodon_contortrix_contortrix d-3-phosphoglycerate dehydrogenase-like protein
SB0265VGL_bridger_k30_2486	85.48	60.54	NonToxin	NonToxin	GBEX01002257|Crotalus_adamanteus nogo-B receptor-like protein
SB0265VGL_bridger_k30_24863	2.25	9.53	NonToxin	Uncharacterized	Uncharacterized
SB0265VGL_bridger_k30_2497	71	89.42	NonToxin	NonToxin	GBEX01003475|Crotalus_adamanteus TFIIH basal transcription factor complex
SB0265VGL_bridger_k30_24995	2.28	12.06	NonToxin	Uncharacterized	Uncharacterized
SB0265VGL_bridger_k30_2508	82.97	224.6	NonToxin	NonToxin	proteasome (prosome, macropain) subunit, alpha type, 3
SB0265VGL_bridger_k30_2525	70.65	73.25	NonToxin	NonToxin	GAAZ01001923|Crotalus_horridus 26S protease regulatory subunit 7
SB0265VGL_bridger_k30_25259	1.14	5.07	NonToxin	Uncharacterized	Uncharacterized
SB0265VGL_bridger_k30_2531	132.37	138.06	NonToxin	NonToxin	ENSNSUP00000006918,1|PFDN2 PFDN2 prefoldin subunit 2 [Source:HGNC Symbol;Acc:HGNC:8867]
SB0265VGL_bridger_k30_25315	1.89	2.48	NonToxin	Uncharacterized	Uncharacterized
SB0265VGL_bridger_k30_2549	11.04	17.34	NonToxin	NonToxin	GAAZ01001160|Crotalus_horridus Insulin-induced 1 protein-like protein
SB0265VGL_bridger_k30_2555	98.32	76.24	NonToxin	NonToxin	GDAY02002624|Agkistrodon_contortrix_contortrix transmembrane protein 97
SB0265VGL_bridger_k30_2558	119.37	133.82	NonToxin	NonToxin	GBSI01001364|Hypsiglena_sp,_JMG-2014 membrane magnesium transporter 1
SB0265VGL_bridger_k30_25610	2.98	4.13	NonToxin	Uncharacterized	Uncharacterized
SB0265VGL_bridger_k30_2562	92.28	128.66	NonToxin	NonToxin	GDAY02002510|Agkistrodon_contortrix_contortrix T-complex protein 1 subunit gamma-like protein
SB0265VGL_bridger_k30_2563	124.98	235.92	NonToxin	NonToxin	GAAZ01002926|Crotalus_horridus v-type proton ATPase subunit e 1-like protein
SB0265VGL_bridger_k30_25637	1.74	7.21	NonToxin	Uncharacterized	Uncharacterized
SB0265VGL_bridger_k30_2565	11.38	25.27	NonToxin	NonToxin	GDAY02001293|Agkistrodon_contortrix_contortrix hypothetical protein
SB0265VGL_bridger_k30_2566	75.12	45.63	NonToxin	NonToxin	GBEX01000129|Crotalus_adamanteus ADP-dependent glucokinase-like protein
SB0265VGL_bridger_k30_2569	55.74	209.06	NonToxin	NonToxin	GDAY02002352|Agkistrodon_contortrix_contortrix solute carrier family 39 (zinc transporter),
SB0265VGL_bridger_k30_2589	55.28	91.15	NonToxin	Uncharacterized	Uncharacterized
SB0265VGL_bridger_k30_2594	62.59	106.87	NonToxin	NonToxin	GBEW01000637|Micrurus_fulvius NHP2-like protein 1-like protein
SB0265VGL_bridger_k30_2595	108.1	149.28	NonToxin	NonToxin	GBSH01002662|Boiga_irregularis Synaptogyrin 2
SB0265VGL_bridger_k30_2596	45.38	95.05	NonToxin	NonToxin	thioredoxin 2
SB0265VGL_bridger_k30_26026	2.6	9.33	NonToxin	Uncharacterized	Uncharacterized
SB0265VGL_bridger_k30_26063	1.19	3.79	NonToxin	Uncharacterized	Uncharacterized
SB0265VGL_bridger_k30_2617	87.79	155.58	NonToxin	NonToxin	GAAZ01000545|Crotalus_horridus Coatomer subunit epsilon
SB0265VGL_bridger_k30_26178	1.35	4.67	NonToxin	Uncharacterized	Uncharacterized
SB0265VGL_bridger_k30_2621	80.65	99.97	NonToxin	NonToxin	GDAY02000253|Agkistrodon_contortrix_contortrix Basigin
SB0265VGL_bridger_k30_26211	1.97	6.21	NonToxin	Uncharacterized	Uncharacterized
SB0265VGL_bridger_k30_2623	109.32	202.48	NonToxin	NonToxin	GAAZ01002577|Crotalus_horridus Eukaryotic translation initiation factor 3
SB0265VGL_bridger_k30_2624	67.8	230.49	NonToxin	NonToxin	ENSNSUP00000020541,1
SB0265VGL_bridger_k30_26284	2.67	2.3	NonToxin	Uncharacterized	Uncharacterized
SB0265VGL_bridger_k30_2629	56.68	62.45	NonToxin	Uncharacterized	Uncharacterized
SB0265VGL_bridger_k30_263	2005.77	11317.2	NonToxin	Uncharacterized	Uncharacterized
SB0265VGL_bridger_k30_2632	25.9	49.21	NonToxin	NonToxin	GAAZ01002398|Crotalus_horridus SPARC-like protein
SB0265VGL_bridger_k30_2659	95.95	198.66	NonToxin	NonToxin	GBEW01000002|Micrurus_fulvius 14-3-3 protein epsilon
SB0265VGL_bridger_k30_2672	27.01	54.26	NonToxin	NonToxin	GDAY02001806|Agkistrodon_contortrix_contortrix p53 apoptosis effector related to PMP-22-like
SB0265VGL_bridger_k30_26726	2.9	10.88	NonToxin	Uncharacterized	Uncharacterized
SB0265VGL_bridger_k30_2690	108.23	107.23	NonToxin	NonToxin	ENSNSUP00000016485,1|NDUFA2 NDUFA2 NADH:ubiquinone oxidoreductase subunit A2 [Source:HGNC Symbol;Acc:HGNC:7685]
SB0265VGL_bridger_k30_2691	108.56	171.89	NonToxin	NonToxin	ENSNSUP00000012714,1
SB0265VGL_bridger_k30_26942	2.35	5.54	NonToxin	Uncharacterized	Uncharacterized
SB0265VGL_bridger_k30_26949	4.24	2.34	NonToxin	Uncharacterized	Uncharacterized
SB0265VGL_bridger_k30_2700	72.52	150.79	NonToxin	NonToxin	DAZ associated protein 1
SB0265VGL_bridger_k30_2713	82.1	163.59	NonToxin	NonToxin	GDAY02000236|Agkistrodon_contortrix_contortrix ATP synthase-coupling factor 6,
SB0265VGL_bridger_k30_2716	125.54	408.7	NonToxin	NonToxin	GBEX01001926|Crotalus_adamanteus Matrix Gla protein-like protein
SB0265VGL_bridger_k30_2718	45.05	45.19	NonToxin	NonToxin	GAAZ01001596|Crotalus_horridus Neutral alpha-glucosidase AB-like protein
SB0265VGL_bridger_k30_272	216.57	1689.71	NonToxin	Uncharacterized	Uncharacterized
SB0265VGL_bridger_k30_2734	76.46	384.76	NonToxin	NonToxin	GAAZ01001771|Crotalus_horridus Phosphate carrier protein, mitochondrial-like
SB0265VGL_bridger_k30_27371	2.15	7.34	NonToxin	Uncharacterized	Uncharacterized
SB0265VGL_bridger_k30_2738	11.39	14.69	NonToxin	NonToxin	GBEX01003065|Crotalus_adamanteus Secretory carrier-associated membrane protein 3
SB0265VGL_bridger_k30_2746	87.08	203.11	NonToxin	NonToxin	GAAZ01000270|Crotalus_horridus b-cell receptor-associated protein 31-like
SB0265VGL_bridger_k30_27469	1.72	5.32	NonToxin	Uncharacterized	Uncharacterized
SB0265VGL_bridger_k30_2747	42.22	271.82	NonToxin	NonToxin	GBEW01000605|Micrurus_fulvius Cellular nucleic acid binding protein
SB0265VGL_bridger_k30_27570	2.15	3.67	NonToxin	Uncharacterized	Uncharacterized
SB0265VGL_bridger_k30_2759	38.96	56.61	NonToxin	NonToxin	GAAZ01000412|Crotalus_horridus cAMP-dependent protein kinase catalytic subunit
SB0265VGL_bridger_k30_27592	1.68	11	NonToxin	NonToxin	small nuclear ribonucleoprotein 35kDa (U11/U12)
SB0265VGL_bridger_k30_27625	3.2	1.05	NonToxin	Uncharacterized	Uncharacterized
SB0265VGL_bridger_k30_27659	1.6	10.36	NonToxin	Uncharacterized	Uncharacterized
SB0265VGL_bridger_k30_27722	1.75	1.66	NonToxin	NonToxin	RAB20, member RAS oncogene family
SB0265VGL_bridger_k30_27731	3.68	4.67	NonToxin	Uncharacterized	Uncharacterized
SB0265VGL_bridger_k30_27768	1.58	3.52	NonToxin	NonToxin	nicotinamide nucleotide adenylyltransferase 2
SB0265VGL_bridger_k30_2782	91.23	48.65	NonToxin	NonToxin	GBEX01001296|Crotalus_adamanteus Flotillin 2-like protein
SB0265VGL_bridger_k30_27820	1.96	4.36	NonToxin	Uncharacterized	Uncharacterized
SB0265VGL_bridger_k30_2783	6.6	2.15	NonToxin	NonToxin	GBEX01001296|Crotalus_adamanteus Flotillin 2-like protein
SB0265VGL_bridger_k30_279	22.34	15.02	NonToxin	NonToxin	nuclear fragile X mental retardation protein interacting protein 2
SB0265VGL_bridger_k30_27919	1.71	6.47	NonToxin	Uncharacterized	Uncharacterized
SB0265VGL_bridger_k30_27926	2.94	3.33	NonToxin	Uncharacterized	Uncharacterized
SB0265VGL_bridger_k30_28343	1.76	9.9	NonToxin	Uncharacterized	Uncharacterized
SB0265VGL_bridger_k30_28352	2.67	4.4	NonToxin	Uncharacterized	Uncharacterized
SB0265VGL_bridger_k30_2838	92.73	133.44	NonToxin	NonToxin	GBEX01002769|Crotalus_adamanteus receptor expression-enhancing protein 5-like
SB0265VGL_bridger_k30_2841	17.7	22.53	NonToxin	NonToxin	penta-EF-hand domain containing 1
SB0265VGL_bridger_k30_28412	2.76	14.57	NonToxin	Uncharacterized	Uncharacterized
SB0265VGL_bridger_k30_2842	74.99	146.49	NonToxin	NonToxin	penta-EF-hand domain containing 1
SB0265VGL_bridger_k30_2850	8.06	2.37	NonToxin	NonToxin	ENSACAG00000000676|ENSACAP00000000567|PRADC1 PRADC1 protease associated domain containing 1 [Source:NCBI gene;Acc:100562256]
SB0265VGL_bridger_k30_28526	2.73	1.13	NonToxin	Uncharacterized	Uncharacterized
SB0265VGL_bridger_k30_28762	2.5	1.03	NonToxin	Uncharacterized	Uncharacterized
SB0265VGL_bridger_k30_2877	76.72	144.84	NonToxin	NonToxin	GDAY02001004|Agkistrodon_contortrix_contortrix g-rich sequence factor 1
SB0265VGL_bridger_k30_2880	64.07	78.45	NonToxin	NonToxin	GDAY02002538|Agkistrodon_contortrix_contortrix Cyclic AMP-dependent transcription factor ATF-5
SB0265VGL_bridger_k30_28818	2.16	1.45	NonToxin	Uncharacterized	Uncharacterized
SB0265VGL_bridger_k30_28823	1.92	18.54	NonToxin	Uncharacterized	Uncharacterized
SB0265VGL_bridger_k30_28942	1.44	1.14	NonToxin	Uncharacterized	Uncharacterized
SB0265VGL_bridger_k30_28964	1.56	2.48	NonToxin	Uncharacterized	Uncharacterized
SB0265VGL_bridger_k30_2899	105.15	133.04	NonToxin	NonToxin	GAAZ01000633|Crotalus_horridus Cytochrome c
SB0265VGL_bridger_k30_29089	2.12	7.03	NonToxin	Uncharacterized	Uncharacterized
SB0265VGL_bridger_k30_2909	97.81	71.3	NonToxin	NonToxin	GBEX01002158|Crotalus_adamanteus NADH dehydrogenase (ubiquinone) 1 beta
SB0265VGL_bridger_k30_2912	81.4	74.21	NonToxin	NonToxin	GBEX01001490|Crotalus_adamanteus HCLS1-associated protein X-1
SB0265VGL_bridger_k30_2914	72.88	102.88	NonToxin	NonToxin	GBEW01001116|Micrurus_fulvius Transforming protein RhoA
SB0265VGL_bridger_k30_2915	60.84	53.45	NonToxin	NonToxin	GBEX01002790|Crotalus_adamanteus Reticulon-3-like protein
SB0265VGL_bridger_k30_29179	4.87	8.54	NonToxin	Uncharacterized	Uncharacterized
SB0265VGL_bridger_k30_29187	1.57	1.88	NonToxin	Uncharacterized	Uncharacterized
SB0265VGL_bridger_k30_2922	91.13	102.12	NonToxin	Uncharacterized	Uncharacterized
SB0265VGL_bridger_k30_29416	1.86	4.72	NonToxin	Uncharacterized	Uncharacterized
SB0265VGL_bridger_k30_29424	1.27	4.18	NonToxin	NonToxin	ENSNSUP00000007198,1|ACYP2 ACYP2 acylphosphatase 2 [Source:HGNC Symbol;Acc:HGNC:180]
SB0265VGL_bridger_k30_2953	85.88	86.85	NonToxin	NonToxin	GBEX01000392|Crotalus_adamanteus Brain protein 44-like protein
SB0265VGL_bridger_k30_29535	1.44	5.56	NonToxin	Uncharacterized	Uncharacterized
SB0265VGL_bridger_k30_2955	71.47	30.09	NonToxin	NonToxin	GDAY02000605|Agkistrodon_contortrix_contortrix cytochrome b5 type B-like
SB0265VGL_bridger_k30_2958	81.03	25.58	NonToxin	NonToxin	GDAY02001797|Agkistrodon_contortrix_contortrix phospholipase D3-like
SB0265VGL_bridger_k30_29669	1.67	9.98	NonToxin	Uncharacterized	Uncharacterized
SB0265VGL_bridger_k30_2968	68.41	155.62	NonToxin	NonToxin	GAAZ01000237|Crotalus_horridus ATP synthase subunit b, mitochondrial-like
SB0265VGL_bridger_k30_29855	1.21	4.93	NonToxin	NonToxin	syntaxin binding protein 6 (amisyn)
SB0265VGL_bridger_k30_2988	48.25	87.14	NonToxin	NonToxin	GBEW01000310|Micrurus_fulvius Dynein light chain 2, cytoplasmic
SB0265VGL_bridger_k30_29940	1.12	10.89	NonToxin	Uncharacterized	Uncharacterized
SB0265VGL_bridger_k30_30	65.75	58.12	NonToxin	NonToxin	GAAZ01001203|Crotalus_horridus TLD domain-containing protein KIAA1609
SB0265VGL_bridger_k30_3009	105.51	85.31	NonToxin	NonToxin	GBEW01000149|Micrurus_fulvius c-Myc-binding protein-like protein
SB0265VGL_bridger_k30_30117	2.24	1.44	NonToxin	Uncharacterized	Uncharacterized
SB0265VGL_bridger_k30_30167	3.92	11.66	NonToxin	Uncharacterized	Uncharacterized
SB0265VGL_bridger_k30_30283	2.1	3.32	NonToxin	Uncharacterized	Uncharacterized
SB0265VGL_bridger_k30_30422	2.33	1.9	NonToxin	Uncharacterized	Uncharacterized
SB0265VGL_bridger_k30_3045	49.75	43.31	NonToxin	NonToxin	GAAZ01000742|Crotalus_horridus dynactin subunit 5
SB0265VGL_bridger_k30_3047	61.57	87.47	NonToxin	NonToxin	GAAZ01000086|Crotalus_horridus Adenylosuccinate synthetase
SB0265VGL_bridger_k30_30470	2.47	4.15	NonToxin	Uncharacterized	Uncharacterized
SB0265VGL_bridger_k30_30477	5.26	12.2	NonToxin	Uncharacterized	Uncharacterized
SB0265VGL_bridger_k30_30519	2.7	21.29	NonToxin	Uncharacterized	Uncharacterized
SB0265VGL_bridger_k30_3053	77.26	23.05	NonToxin	NonToxin	ENSNSUP00000001236,1|PAFAH1B3 PAFAH1B3 platelet activating factor acetylhydrolase 1b catalytic subunit 3 [Source:HGNC Symbol;Acc:HGNC:8576]
SB0265VGL_bridger_k30_3054	67.63	119.33	NonToxin	NonToxin	GDAY02000818|Agkistrodon_contortrix_contortrix ER lumen protein retaining receptor 3-like
SB0265VGL_bridger_k30_30572	2.34	6.02	NonToxin	Uncharacterized	Uncharacterized
SB0265VGL_bridger_k30_3061	15.01	53.5	NonToxin	NonToxin	GDAY02002669|Agkistrodon_contortrix_contortrix Transmembrane protein 87A
SB0265VGL_bridger_k30_3072	20.66	17.98	NonToxin	NonToxin	SVOP-like
SB0265VGL_bridger_k30_3079	89.5	87.84	NonToxin	Uncharacterized	Uncharacterized
SB0265VGL_bridger_k30_3084	36.64	95.16	NonToxin	NonToxin	GDAY02002553|Agkistrodon_contortrix_contortrix Transcription factor jun-D
SB0265VGL_bridger_k30_3086	67.81	90.51	NonToxin	NonToxin	GAAZ01001432|Crotalus_horridus Mitotic spindle-associated MMXD complex subunit
SB0265VGL_bridger_k30_3090	53.65	49.51	NonToxin	NonToxin	ENSNSUP00000015336,1|SNRPA SNRPA small nuclear ribonucleoprotein polypeptide A [Source:HGNC Symbol;Acc:HGNC:11151]
SB0265VGL_bridger_k30_3096	56.14	49.49	NonToxin	NonToxin	ENSNSUP00000026403,1|RARRES1 RARRES1 retinoic acid receptor responder 1 [Source:HGNC Symbol;Acc:HGNC:9867]
SB0265VGL_bridger_k30_310	17.8	12.83	NonToxin	Uncharacterized	Uncharacterized
SB0265VGL_bridger_k30_3112	66.59	31.22	NonToxin	NonToxin	ENSNSUP00000025754,1|EXOSC4 EXOSC4 exosome component 4 [Source:HGNC Symbol;Acc:HGNC:18189]
SB0265VGL_bridger_k30_31305	1.35	4.19	NonToxin	Uncharacterized	Uncharacterized
SB0265VGL_bridger_k30_3133	75.97	91.94	NonToxin	NonToxin	proteasome (prosome, macropain) 26S subunit, non-ATPase, 7
SB0265VGL_bridger_k30_3142	52.02	58.76	NonToxin	Uncharacterized	Uncharacterized
SB0265VGL_bridger_k30_31431	2.5	3.23	NonToxin	Uncharacterized	Uncharacterized
SB0265VGL_bridger_k30_3147	13.51	94.56	NonToxin	NonToxin	GAAZ01000812|Crotalus_horridus UDP-glucose 4-epimerase-like protein
SB0265VGL_bridger_k30_3162	89.94	207.88	NonToxin	NonToxin	GBSI01000362|Hypsiglena_sp,_JMG-2014 transcription factor BTF3 isoform B
SB0265VGL_bridger_k30_3165	67.06	116.57	NonToxin	NonToxin	GAAZ01000475|Crotalus_horridus CD9 antigen
SB0265VGL_bridger_k30_31767	1.55	11.71	NonToxin	Uncharacterized	Uncharacterized
SB0265VGL_bridger_k30_3177	28.5	111.28	NonToxin	NonToxin	GAAZ01000543|Crotalus_horridus Coatomer subunit beta'-like protein
SB0265VGL_bridger_k30_31810	1.23	1.91	NonToxin	Uncharacterized	Uncharacterized
SB0265VGL_bridger_k30_31812	4.01	2.3	NonToxin	Uncharacterized	Uncharacterized
SB0265VGL_bridger_k30_3182	38.42	17.33	NonToxin	Uncharacterized	Uncharacterized
SB0265VGL_bridger_k30_31849	4.33	7.58	NonToxin	Uncharacterized	Uncharacterized
SB0265VGL_bridger_k30_3195	19.14	52.67	NonToxin	NonToxin	GBEW01000644|Micrurus_fulvius alpha-soluble NSF attachment protein-like
SB0265VGL_bridger_k30_3198	28.31	38.45	NonToxin	NonToxin	ENSNSUP00000007826,1|SLC25A1 SLC25A1 solute carrier family 25 member 1 [Source:HGNC Symbol;Acc:HGNC:10979]
SB0265VGL_bridger_k30_31994	3.23	4.06	NonToxin	Uncharacterized	Uncharacterized
SB0265VGL_bridger_k30_3200	68.15	74.25	NonToxin	NonToxin	GAAZ01002110|Crotalus_horridus DNA-directed RNA polymerase II subunit RPB7-like
SB0265VGL_bridger_k30_3214	98.47	93.64	NonToxin	NonToxin	GBSI01000247|Hypsiglena_sp,_JMG-2014 AP-2 complex subunit sigma
SB0265VGL_bridger_k30_3223	34.52	45.98	NonToxin	NonToxin	GDAY02001009|Agkistrodon_contortrix_contortrix growth hormone inducible transmembrane protein
SB0265VGL_bridger_k30_32264	2.33	11.24	NonToxin	Uncharacterized	Uncharacterized
SB0265VGL_bridger_k30_3227	62.23	41.45	NonToxin	NonToxin	GDAY02001994|Agkistrodon_contortrix_contortrix retinoid X receptor, beta
SB0265VGL_bridger_k30_3229	21.89	10.34	NonToxin	NonToxin	GDAY02001994|Agkistrodon_contortrix_contortrix retinoid X receptor, beta
SB0265VGL_bridger_k30_32335	3.26	9.29	NonToxin	Uncharacterized	Uncharacterized
SB0265VGL_bridger_k30_32470	1.29	2.53	NonToxin	NonToxin	RAB20, member RAS oncogene family
SB0265VGL_bridger_k30_32479	3.17	16.72	NonToxin	Uncharacterized	Uncharacterized
SB0265VGL_bridger_k30_32494	1.65	5.53	NonToxin	Uncharacterized	Uncharacterized
SB0265VGL_bridger_k30_3253	2.49	23.94	NonToxin	Uncharacterized	Uncharacterized
SB0265VGL_bridger_k30_3255	6.47	35.71	NonToxin	NonToxin	prolyl 4-hydroxylase, alpha polypeptide III
SB0265VGL_bridger_k30_32570	2.76	14.57	NonToxin	Uncharacterized	Uncharacterized
SB0265VGL_bridger_k30_32760	1.41	11.71	NonToxin	Uncharacterized	Uncharacterized
SB0265VGL_bridger_k30_32776	2.28	4.12	NonToxin	Uncharacterized	Uncharacterized
SB0265VGL_bridger_k30_32910	2.54	1.43	NonToxin	Uncharacterized	Uncharacterized
SB0265VGL_bridger_k30_32923	2.1	1.16	NonToxin	Uncharacterized	Uncharacterized
SB0265VGL_bridger_k30_33011	1.85	2.96	NonToxin	Uncharacterized	Uncharacterized
SB0265VGL_bridger_k30_3303	85.44	109.99	NonToxin	NonToxin	GBEW01001025|Micrurus_fulvius Transcription elongation factor B polypeptide 1
SB0265VGL_bridger_k30_3309	50.88	78.97	NonToxin	NonToxin	GBEX01000071|Crotalus_adamanteus actin-related protein 2/3 complex subunit 1A
SB0265VGL_bridger_k30_33102	1.09	15.87	NonToxin	Uncharacterized	Uncharacterized
SB0265VGL_bridger_k30_33105	1.42	6.73	NonToxin	Uncharacterized	Uncharacterized
SB0265VGL_bridger_k30_3314	19.92	37.66	NonToxin	NonToxin	GBEW01000174|Micrurus_fulvius Calcium-binding protein 39-like protein
SB0265VGL_bridger_k30_3317	85.26	91.76	NonToxin	NonToxin	GBEX01002155|Crotalus_adamanteus NADH dehydrogenase (ubiquinone) 1 beta
SB0265VGL_bridger_k30_3325	5.07	13.91	NonToxin	Uncharacterized	Uncharacterized
SB0265VGL_bridger_k30_3327	4.46	5.49	NonToxin	NonToxin	GDAY02002414|Agkistrodon_contortrix_contortrix carbohydrate sulfotransferase 14
SB0265VGL_bridger_k30_3331	1.55	14.19	NonToxin	Uncharacterized	Uncharacterized
SB0265VGL_bridger_k30_33316	2.22	3.52	NonToxin	Uncharacterized	Uncharacterized
SB0265VGL_bridger_k30_3352	30.26	147.05	NonToxin	NonToxin	GDAY02001145|Agkistrodon_contortrix_contortrix Immediate early response 2 protein-like protein
SB0265VGL_bridger_k30_3363	55.07	36.68	NonToxin	NonToxin	GDAY02001896|Agkistrodon_contortrix_contortrix Proteasome inhibitor PI31 subunit-like protein
SB0265VGL_bridger_k30_3370	4.15	2.62	NonToxin	NonToxin	carbonic anhydrase VIII
SB0265VGL_bridger_k30_3371	27.56	73.49	NonToxin	NonToxin	ENSNSUP00000012250,1|CA5B CA5B carbonic anhydrase 5B [Source:HGNC Symbol;Acc:HGNC:1378]
SB0265VGL_bridger_k30_33713	1.44	2.98	NonToxin	Uncharacterized	Uncharacterized
SB0265VGL_bridger_k30_33714	2.07	5.01	NonToxin	Uncharacterized	Uncharacterized
SB0265VGL_bridger_k30_33794	1.45	4.82	NonToxin	Uncharacterized	Uncharacterized
SB0265VGL_bridger_k30_3382	33.97	17.59	NonToxin	NonToxin	exonuclease 3'-5' domain containing 2
SB0265VGL_bridger_k30_3383	7.21	1.71	NonToxin	NonToxin	exonuclease 3'-5' domain containing 2
SB0265VGL_bridger_k30_3398	75.08	63.29	NonToxin	Uncharacterized	Uncharacterized
SB0265VGL_bridger_k30_340	254.88	101.65	NonToxin	Uncharacterized	Uncharacterized
SB0265VGL_bridger_k30_3400	2.91	4.4	NonToxin	NonToxin	Tetraspanin
SB0265VGL_bridger_k30_34005	2.4	8.04	NonToxin	NonToxin	Ras association (RalGDS/AF-6) domain family member 3
SB0265VGL_bridger_k30_3401	28.63	32.05	NonToxin	NonToxin	ENSACAG00000001702|ENSACAP00000001671|TPD52L1 TPD52L1 TPD52 like 1 [Source:NCBI gene;Acc:100567305]
SB0265VGL_bridger_k30_3403	29.61	22.2	NonToxin	Uncharacterized	Uncharacterized
SB0265VGL_bridger_k30_34049	1.25	2.05	NonToxin	Uncharacterized	Uncharacterized
SB0265VGL_bridger_k30_34084	3.22	16.51	NonToxin	Uncharacterized	Uncharacterized
SB0265VGL_bridger_k30_3410	4.87	8.54	NonToxin	Uncharacterized	Uncharacterized
SB0265VGL_bridger_k30_34134	1.63	1.94	NonToxin	Uncharacterized	Uncharacterized
SB0265VGL_bridger_k30_34263	1.82	9.56	NonToxin	Uncharacterized	Uncharacterized
SB0265VGL_bridger_k30_3428	57.08	75.93	NonToxin	NonToxin	GDAY02001846|Agkistrodon_contortrix_contortrix Prefoldin subunit 6
SB0265VGL_bridger_k30_3432	47.46	31.84	NonToxin	NonToxin	GAAZ01001010|Crotalus_horridus Golgi phosphoprotein 3-like protein
SB0265VGL_bridger_k30_3436	31.89	27.89	NonToxin	NonToxin	ENSNSUP00000003899,1|FBXW5 FBXW5 F-box and WD repeat domain containing 5 [Source:HGNC Symbol;Acc:HGNC:13613]
SB0265VGL_bridger_k30_34394	1.53	9.43	NonToxin	Uncharacterized	Uncharacterized
SB0265VGL_bridger_k30_3445	62.37	203.68	NonToxin	NonToxin	GAAZ01001966|Crotalus_horridus Ras-related protein Rab-1A
SB0265VGL_bridger_k30_3458	67.15	72.6	NonToxin	NonToxin	ENSNSUP00000004458,1|SMDT1 SMDT1 single-pass membrane protein with aspartate rich tail 1 [Source:HGNC Symbol;Acc:HGNC:25055]
SB0265VGL_bridger_k30_34604	1.51	1.26	NonToxin	Uncharacterized	Uncharacterized
SB0265VGL_bridger_k30_3488	71.81	50.31	NonToxin	NonToxin	GAAZ01001787|Crotalus_horridus Putative phosphohistidine phosphatase 1
SB0265VGL_bridger_k30_34897	2.76	7.78	NonToxin	Uncharacterized	Uncharacterized
SB0265VGL_bridger_k30_3492	59.35	35.11	NonToxin	NonToxin	GAAZ01001743|Crotalus_horridus Gamma-secretase subunit PEN-2-like protein
SB0265VGL_bridger_k30_3493	49.67	142.32	NonToxin	NonToxin	GAAZ01001118|Crotalus_horridus Heat shock cognate 71 kDa protein-like protein
SB0265VGL_bridger_k30_3502	61.48	76.73	NonToxin	NonToxin	GBEW01000309|Micrurus_fulvius Dynein light chain 1, cytoplasmic-like protein
SB0265VGL_bridger_k30_3509	17.91	22.82	NonToxin	NonToxin	ENSNSUP00000013650,1|CCDC12 CCDC12 coiled-coil domain containing 12 [Source:HGNC Symbol;Acc:HGNC:28332]
SB0265VGL_bridger_k30_3512	39.95	29.32	NonToxin	NonToxin	COMM domain containing 8
SB0265VGL_bridger_k30_3513	3.28	26.64	NonToxin	Uncharacterized	Uncharacterized
SB0265VGL_bridger_k30_3514	27.57	30.85	NonToxin	NonToxin	GAAZ01003028|Crotalus_horridus Zinc transporter 7-like protein
SB0265VGL_bridger_k30_3529	30.85	88.23	NonToxin	NonToxin	ENSNSUP00000025856,1|LAMP1 LAMP1 lysosomal associated membrane protein 1 [Source:HGNC Symbol;Acc:HGNC:6499]
SB0265VGL_bridger_k30_3537	125.86	281.73	NonToxin	Uncharacterized	Uncharacterized
SB0265VGL_bridger_k30_3538	73.05	64.18	NonToxin	NonToxin	GBEX01000189|Crotalus_adamanteus 5'-AMP-activated protein kinase beta-1
SB0265VGL_bridger_k30_35393	2.6	6.71	NonToxin	Uncharacterized	Uncharacterized
SB0265VGL_bridger_k30_3544	67.14	79.21	NonToxin	NonToxin	ENSNSUP00000026693,1|NDUFB4 NDUFB4 NADH:ubiquinone oxidoreductase subunit B4 [Source:HGNC Symbol;Acc:HGNC:7699]
SB0265VGL_bridger_k30_35489	3.23	5.61	NonToxin	Uncharacterized	Uncharacterized
SB0265VGL_bridger_k30_356	3181.24	3573.94	NonToxin	Uncharacterized	Uncharacterized
SB0265VGL_bridger_k30_35693	1.7	4.83	NonToxin	Uncharacterized	Uncharacterized
SB0265VGL_bridger_k30_3570	25.47	63.05	NonToxin	NonToxin	GBEX01003674|Crotalus_adamanteus Transferrin receptor protein 1-like protein
SB0265VGL_bridger_k30_3573	31.12	17.31	NonToxin	NonToxin	plasminogen activator, tissue
SB0265VGL_bridger_k30_3574	41.51	8.56	NonToxin	Uncharacterized	Uncharacterized
SB0265VGL_bridger_k30_3575	43	73.82	NonToxin	NonToxin	GAAZ01000142|Crotalus_horridus Aminopeptidase N
SB0265VGL_bridger_k30_3577	61.04	38.66	NonToxin	NonToxin	ENSNSUP00000012296,1|HSPB1 HSPB1 heat shock protein family B (small) member 1 [Source:HGNC Symbol;Acc:HGNC:5246]
SB0265VGL_bridger_k30_358	1554.16	7779.05	NonToxin	Uncharacterized	Uncharacterized
SB0265VGL_bridger_k30_3585	58.25	130.06	NonToxin	Uncharacterized	Uncharacterized
SB0265VGL_bridger_k30_3589	38.63	127.93	NonToxin	NonToxin	GBEX01001552|Crotalus_adamanteus Heterogeneous nuclear ribonucleoproteins C1/C2
SB0265VGL_bridger_k30_35910	2.38	7.77	NonToxin	Uncharacterized	Uncharacterized
SB0265VGL_bridger_k30_3598	47.52	21.29	NonToxin	NonToxin	GDAY02000789|Agkistrodon_contortrix_contortrix Engulfment and cell motility protein 2
SB0265VGL_bridger_k30_3602	65.2	165.23	NonToxin	NonToxin	ENSNSUP00000019191,1|RAN RAN RAN, member RAS oncogene family [Source:HGNC Symbol;Acc:HGNC:9846]
SB0265VGL_bridger_k30_362	771.49	1544.62	NonToxin	NonToxin	GAAZ01002203|Crotalus_horridus 40S ribosomal protein S7
SB0265VGL_bridger_k30_3626	64.63	206.11	NonToxin	NonToxin	GBEX01002201|Crotalus_adamanteus Nucleotide exchange factor SIL1-like protein
SB0265VGL_bridger_k30_363	19.31	30	NonToxin	NonToxin	GBEX01000577|Crotalus_adamanteus Secretory carrier membrane protein 2
SB0265VGL_bridger_k30_36309	1.16	7.92	NonToxin	Uncharacterized	Uncharacterized
SB0265VGL_bridger_k30_3642	52.18	70.25	NonToxin	NonToxin	polymerase (DNA directed), gamma 2, accessory subunit
SB0265VGL_bridger_k30_3644	20.27	17.7	NonToxin	NonToxin	GDAY02001057|Agkistrodon_contortrix_contortrix Hexosaminidase D-like protein
SB0265VGL_bridger_k30_3663	55.21	108.44	NonToxin	NonToxin	GBEW01000385|Micrurus_fulvius Gamma-aminobutyric acid receptor-associated
SB0265VGL_bridger_k30_3675	54.68	58.07	NonToxin	NonToxin	adaptor-related protein complex 4, sigma 1 subunit
SB0265VGL_bridger_k30_3688	55.59	113.88	NonToxin	NonToxin	GDAY02000950|Agkistrodon_contortrix_contortrix Glucose-6-phosphate isomerase-like protein
SB0265VGL_bridger_k30_3689	20.69	6.07	NonToxin	NonToxin	GAAZ01002647|Crotalus_horridus Transmembrane protein 203
SB0265VGL_bridger_k30_36953	1.67	5.8	NonToxin	Uncharacterized	Uncharacterized
SB0265VGL_bridger_k30_3699	36.21	55.53	NonToxin	NonToxin	GBSI01000466|Hypsiglena_sp,_JMG-2014 Casein kinase II subunit alpha'-like protein
SB0265VGL_bridger_k30_37067	1.26	6.53	NonToxin	Uncharacterized	Uncharacterized
SB0265VGL_bridger_k30_3715	54.37	13.2	NonToxin	NonToxin	GBEX01001196|Crotalus_adamanteus receptor expression-enhancing protein 6
SB0265VGL_bridger_k30_3716	59.19	100.65	NonToxin	NonToxin	GAAZ01002954|Crotalus_horridus WD repeat domain 5
SB0265VGL_bridger_k30_3742	30.48	80.51	NonToxin	NonToxin	GDAY02001747|Agkistrodon_contortrix_contortrix Phosphoglycerate mutase 1-like protein
SB0265VGL_bridger_k30_3746	35.05	85.15	NonToxin	Uncharacterized	Uncharacterized
SB0265VGL_bridger_k30_37489	1.67	2.9	NonToxin	Uncharacterized	Uncharacterized
SB0265VGL_bridger_k30_3751	59.13	12.94	NonToxin	NonToxin	GBEX01002793|Crotalus_adamanteus cellular retinoic acid binding protein 2
SB0265VGL_bridger_k30_37633	1.36	1.46	NonToxin	Uncharacterized	Uncharacterized
SB0265VGL_bridger_k30_377	54.44	70.26	NonToxin	NonToxin	ENSNSUP00000017695,1|SLC3A2 SLC3A2 solute carrier family 3 member 2 [Source:HGNC Symbol;Acc:HGNC:11026]
SB0265VGL_bridger_k30_3802	47.22	55.36	NonToxin	NonToxin	mitochondrial ribosomal protein S26
SB0265VGL_bridger_k30_3803	9.22	8.7	NonToxin	NonToxin	mitochondrial ribosomal protein S26
SB0265VGL_bridger_k30_38046	1.71	2.88	NonToxin	Uncharacterized	Uncharacterized
SB0265VGL_bridger_k30_3806	33.32	69.93	NonToxin	Uncharacterized	Uncharacterized
SB0265VGL_bridger_k30_3807	50.95	76.5	NonToxin	NonToxin	GDAY02001421|Agkistrodon_contortrix_contortrix Microtubule-associated protein RP/EB family
SB0265VGL_bridger_k30_382	6.52	31.98	NonToxin	NonToxin	GBEW01001152|Micrurus_fulvius Ubiquitin-like protein 3
SB0265VGL_bridger_k30_3830	36.27	1129.13	NonToxin	NonToxin	GBEX01002337|Crotalus_adamanteus proto-oncogene c-Fos
SB0265VGL_bridger_k30_3838	46.61	106.86	NonToxin	NonToxin	GDAY02002593|Agkistrodon_contortrix_contortrix Eukaryotic translation initiation factor
SB0265VGL_bridger_k30_3840	37.31	91.78	NonToxin	NonToxin	GAAZ01001909|Crotalus_horridus Proteasome subunit alpha type-4 protein
SB0265VGL_bridger_k30_38469	1.25	10.73	NonToxin	Uncharacterized	Uncharacterized
SB0265VGL_bridger_k30_38472	1.76	8.93	NonToxin	Uncharacterized	Uncharacterized
SB0265VGL_bridger_k30_38493	3.5	3.05	NonToxin	Uncharacterized	Uncharacterized
SB0265VGL_bridger_k30_38494	1.43	2.48	NonToxin	Uncharacterized	Uncharacterized
SB0265VGL_bridger_k30_3850	49.57	131.1	NonToxin	NonToxin	GBSI01000424|Hypsiglena_sp,_JMG-2014 Calcyclin-binding protein-like
SB0265VGL_bridger_k30_38517	1.73	2.91	NonToxin	Uncharacterized	Uncharacterized
SB0265VGL_bridger_k30_3860	51.9	116.84	NonToxin	NonToxin	GAAZ01000480|Crotalus_horridus Cell division control protein 42
SB0265VGL_bridger_k30_38761	1.39	2.4	NonToxin	Uncharacterized	Uncharacterized
SB0265VGL_bridger_k30_3883	40.01	30.15	NonToxin	NonToxin	GDAY02001780|Agkistrodon_contortrix_contortrix Phosphatidylinositol transfer protein alpha
SB0265VGL_bridger_k30_3887	48.11	59.28	NonToxin	Uncharacterized	Uncharacterized
SB0265VGL_bridger_k30_38879	1.56	5.57	NonToxin	NonToxin	GTP-binding protein 8 (putative)
SB0265VGL_bridger_k30_3907	67.76	65.78	NonToxin	Uncharacterized	Uncharacterized
SB0265VGL_bridger_k30_3908	33.4	29.08	NonToxin	NonToxin	GBEX01004010|Crotalus_adamanteus WW domain-binding protein 2-like protein
SB0265VGL_bridger_k30_3911	66.12	61.31	NonToxin	NonToxin	GAAZ01002410|Crotalus_horridus splicing factor 3B subunit 5
SB0265VGL_bridger_k30_3916	51.3	82.08	NonToxin	NonToxin	GAAZ01001107|Crotalus_horridus Heat shock factor-binding protein 1-like
SB0265VGL_bridger_k30_39199	3.5	9.15	NonToxin	Uncharacterized	Uncharacterized
SB0265VGL_bridger_k30_39206	1.67	2.9	NonToxin	Uncharacterized	Uncharacterized
SB0265VGL_bridger_k30_3936	57.88	208.44	NonToxin	NonToxin	GBEX01003538|Crotalus_adamanteus Eukaryotic translation initiation factor 3
SB0265VGL_bridger_k30_3937	59.18	28.64	NonToxin	NonToxin	GDAY02000123|Agkistrodon_contortrix_contortrix Alpha-crystallin B chain-like protein
SB0265VGL_bridger_k30_39414	5.28	18.69	NonToxin	Uncharacterized	Uncharacterized
SB0265VGL_bridger_k30_395	1943.63	3079.69	NonToxin	NonToxin	GDAY02002125|Agkistrodon_contortrix_contortrix 60S acidic ribosomal protein P2
SB0265VGL_bridger_k30_3954	43.21	42.23	NonToxin	NonToxin	GDAY02002764|Agkistrodon_contortrix_contortrix Tum-P91A antigen
SB0265VGL_bridger_k30_39641	2.05	6.77	NonToxin	Uncharacterized	Uncharacterized
SB0265VGL_bridger_k30_397	24.19	32.48	NonToxin	NonToxin	GDAY02001253|Agkistrodon_contortrix_contortrix lanosterol 14-alpha demethylase-like protein
SB0265VGL_bridger_k30_3970	76.12	75.85	NonToxin	NonToxin	GBEX01002149|Crotalus_adamanteus NADH dehydrogenase (ubiquinone) 1 alpha
SB0265VGL_bridger_k30_39756	2.87	5.96	NonToxin	Uncharacterized	Uncharacterized
SB0265VGL_bridger_k30_3979	33.17	59.31	NonToxin	Uncharacterized	Uncharacterized
SB0265VGL_bridger_k30_39869	1.15	3.05	NonToxin	Uncharacterized	Uncharacterized
SB0265VGL_bridger_k30_40047	1.26	4.35	NonToxin	Uncharacterized	Uncharacterized
SB0265VGL_bridger_k30_40233	2.31	1.98	NonToxin	Uncharacterized	Uncharacterized
SB0265VGL_bridger_k30_4024	49.81	84.31	NonToxin	NonToxin	GAAZ01001925|Crotalus_horridus Proteasome activator complex subunit 1
SB0265VGL_bridger_k30_40242	1.34	4.6	NonToxin	Uncharacterized	Uncharacterized
SB0265VGL_bridger_k30_40322	1.16	1.88	NonToxin	Uncharacterized	Uncharacterized
SB0265VGL_bridger_k30_40565	1.14	10.27	NonToxin	Uncharacterized	Uncharacterized
SB0265VGL_bridger_k30_4083	19.49	42.71	NonToxin	Uncharacterized	Uncharacterized
SB0265VGL_bridger_k30_4084	12.54	19.59	NonToxin	NonToxin	GAAZ01002250|Crotalus_horridus Secretory carrier-associated membrane protein 4
SB0265VGL_bridger_k30_40851	1.65	3.95	NonToxin	Uncharacterized	Uncharacterized
SB0265VGL_bridger_k30_4095	42.72	34.02	NonToxin	NonToxin	GAAZ01001785|Crotalus_horridus phosphoglycerate mutase 2-like protein
SB0265VGL_bridger_k30_4099	45.95	215.34	NonToxin	NonToxin	GAAZ01001117|Crotalus_horridus Heat shock 70 kDa protein-like protein
SB0265VGL_bridger_k30_410	25.44	39.29	NonToxin	NonToxin	GAAZ01001346|Crotalus_horridus maleylacetoacetate isomerase-like protein
SB0265VGL_bridger_k30_41029	1.53	2.47	NonToxin	Uncharacterized	Uncharacterized
SB0265VGL_bridger_k30_41079	2.5	4.29	NonToxin	Uncharacterized	Uncharacterized
SB0265VGL_bridger_k30_4117	15.68	33.35	NonToxin	NonToxin	ENSNSUP00000019138,1|MCL1 MCL1 MCL1 apoptosis regulator, BCL2 family member [Source:HGNC Symbol;Acc:HGNC:6943]
SB0265VGL_bridger_k30_4121	25.74	33.7	NonToxin	NonToxin	GDAY02000781|Agkistrodon_contortrix_contortrix Epithelial membrane protein 2-like protein
SB0265VGL_bridger_k30_4135	56.18	21.48	NonToxin	NonToxin	GBEW01000626|Micrurus_fulvius NEDD8-conjugating enzyme Ubc12-like protein
SB0265VGL_bridger_k30_4141	11.68	40.89	NonToxin	NonToxin	GDAY02000072|Agkistrodon_contortrix_contortrix putative adenosylhomocysteinase 2-like protein
SB0265VGL_bridger_k30_4148	10.7	20.4	NonToxin	NonToxin	ENSNSUP00000001394,1|ARAF ARAF A-Raf proto-oncogene, serine/threonine kinase [Source:HGNC Symbol;Acc:HGNC:646]
SB0265VGL_bridger_k30_4149	44.76	25.5	NonToxin	NonToxin	GBEX01000847|Crotalus_adamanteus cyclin-dependent kinase 5
SB0265VGL_bridger_k30_4154	57.75	48.58	NonToxin	NonToxin	ENSNSUP00000014738,1|PXMP2 PXMP2 peroxisomal membrane protein 2 [Source:HGNC Symbol;Acc:HGNC:9716]
SB0265VGL_bridger_k30_4159	43.36	51.71	NonToxin	NonToxin	GBEX01000732|Crotalus_adamanteus cleft lip and palate transmembrane protein 1
SB0265VGL_bridger_k30_417	75.16	88.98	NonToxin	NonToxin	penta-EF-hand domain containing 1
SB0265VGL_bridger_k30_41701	1.3	2.24	NonToxin	Uncharacterized	Uncharacterized
SB0265VGL_bridger_k30_41923	2.6	6.71	NonToxin	Uncharacterized	Uncharacterized
SB0265VGL_bridger_k30_4193	5.47	4.47	NonToxin	NonToxin	ENSACAG00000007020|ENSACAP00000006871|RELL1 RELL1 RELT like 1 [Source:NCBI gene;Acc:100556924]
SB0265VGL_bridger_k30_4196	16.6	21.93	NonToxin	NonToxin	GBEX01002521|Crotalus_adamanteus plasmalemma vesicle-associated protein
SB0265VGL_bridger_k30_4202	33.44	157.44	NonToxin	NonToxin	GBEX01003391|Crotalus_adamanteus T-complex protein 1 subunit alpha
SB0265VGL_bridger_k30_421	16.83	20.82	NonToxin	Uncharacterized	Uncharacterized
SB0265VGL_bridger_k30_4228	42.72	128.9	NonToxin	NonToxin	GBEW01001153|Micrurus_fulvius Ubiquitin-like protein 5-like protein
SB0265VGL_bridger_k30_42311	1.14	3.91	NonToxin	Uncharacterized	Uncharacterized
SB0265VGL_bridger_k30_4249	37.65	45.65	NonToxin	NonToxin	GBEX01004016|Crotalus_adamanteus selenide, water dikinase 2-like isoform X1
SB0265VGL_bridger_k30_4264	24.02	82.34	NonToxin	NonToxin	GDAY02000412|Agkistrodon_contortrix_contortrix Cathepsin B-like protein
SB0265VGL_bridger_k30_4265	29.32	50.8	NonToxin	NonToxin	GAAZ01002631|Crotalus_horridus Transmembrane protein 147
SB0265VGL_bridger_k30_42790	1.65	1.38	NonToxin	Uncharacterized	Uncharacterized
SB0265VGL_bridger_k30_4293	43.28	175.94	NonToxin	NonToxin	GBEW01000778|Micrurus_fulvius Ras-related protein Rab-2A
SB0265VGL_bridger_k30_4313	42.97	82.97	NonToxin	NonToxin	GAAZ01002669|Crotalus_horridus Transmembrane protein 9B
SB0265VGL_bridger_k30_4320	3.57	15.93	NonToxin	Uncharacterized	Uncharacterized
SB0265VGL_bridger_k30_4326	13.69	12.48	NonToxin	NonToxin	GDAY02000654|Agkistrodon_contortrix_contortrix Decorin-like protein
SB0265VGL_bridger_k30_4346	34.07	65.22	NonToxin	NonToxin	GBEX01002422|Crotalus_adamanteus phosphoenolpyruvate carboxykinase (GTP),
SB0265VGL_bridger_k30_4362	47.4	70.11	NonToxin	NonToxin	GAAZ01001471|Crotalus_horridus Mitochondrial-processing peptidase subunit
SB0265VGL_bridger_k30_4388	22.86	26.17	NonToxin	NonToxin	GDAY02000676|Agkistrodon_contortrix_contortrix N(G),N(G)-dimethylarginine
SB0265VGL_bridger_k30_4411	43.23	49.05	NonToxin	NonToxin	GDAY02002163|Agkistrodon_contortrix_contortrix tRNA methyltransferase 112
SB0265VGL_bridger_k30_4434	23.64	73.77	NonToxin	NonToxin	heterogeneous nuclear ribonucleoprotein U (scaffold attachment factor A)
SB0265VGL_bridger_k30_44382	2.29	8.04	NonToxin	Uncharacterized	Uncharacterized
SB0265VGL_bridger_k30_4448	8.72	17.6	NonToxin	Uncharacterized	Uncharacterized
SB0265VGL_bridger_k30_44519	1.32	2.27	NonToxin	Uncharacterized	Uncharacterized
SB0265VGL_bridger_k30_4459	47.44	60.53	NonToxin	NonToxin	GDAY02000337|Agkistrodon_contortrix_contortrix Glycerol-3-phosphate acyltransferase 4-like
SB0265VGL_bridger_k30_4462	38.59	18.18	NonToxin	NonToxin	GDAY02000892|Agkistrodon_contortrix_contortrix Fhl3 protein
SB0265VGL_bridger_k30_4464	52.66	52.95	NonToxin	NonToxin	GBEW01001051|Micrurus_fulvius Thioredoxin-like protein 4A-like protein
SB0265VGL_bridger_k30_4474	52.84	84.24	NonToxin	NonToxin	GAAZ01001485|Crotalus_horridus 39S ribosomal protein L20, mitochondrial
SB0265VGL_bridger_k30_4480	26.26	23.53	NonToxin	NonToxin	GBEX01000094|Crotalus_adamanteus Acyl-CoA thioesterase 7
SB0265VGL_bridger_k30_4553	9.64	18.87	NonToxin	NonToxin	GBEX01001497|Crotalus_adamanteus hematological and neurological expressed 1-like
SB0265VGL_bridger_k30_4559	27.75	75.12	NonToxin	NonToxin	GDAY02002683|Agkistrodon_contortrix_contortrix Mitochondrial import receptor subunit TOM22-like
SB0265VGL_bridger_k30_4560	19.9	109.96	NonToxin	NonToxin	GAAZ01000141|Crotalus_horridus Aminopeptidase A
SB0265VGL_bridger_k30_4562	40.28	107.29	NonToxin	Uncharacterized	Uncharacterized
SB0265VGL_bridger_k30_4563	28.15	98.78	NonToxin	NonToxin	GBEX01000415|Crotalus_adamanteus B-cell translocation gene 1 protein
SB0265VGL_bridger_k30_45640	2.89	5.08	NonToxin	Uncharacterized	Uncharacterized
SB0265VGL_bridger_k30_4571	16.64	33.15	NonToxin	NonToxin	GDAY02000476|Agkistrodon_contortrix_contortrix Charged multivesicular body protein 5-like
SB0265VGL_bridger_k30_4590	3.04	3.38	NonToxin	NonToxin	GAAZ01002931|Crotalus_horridus v-type proton ATPase subunit C 2-like protein
SB0265VGL_bridger_k30_4595	49.42	153.2	NonToxin	NonToxin	GDAY02002615|Agkistrodon_contortrix_contortrix Triosephosphate isomerase
SB0265VGL_bridger_k30_4598	49.11	125.89	NonToxin	NonToxin	GAAZ01001051|Crotalus_horridus 3-hydroxyacyl-CoA dehydrogenase type-2-like
SB0265VGL_bridger_k30_4612	31.58	147.36	NonToxin	NonToxin	GDAY02001764|Agkistrodon_contortrix_contortrix Phosphoglycerate kinase 1
SB0265VGL_bridger_k30_46614	1.84	6.42	NonToxin	Uncharacterized	Uncharacterized
SB0265VGL_bridger_k30_4666	5.98	14.25	NonToxin	NonToxin	GDAY02000877|Agkistrodon_contortrix_contortrix F-box and WD repeat domain containing 2
SB0265VGL_bridger_k30_4672	47.72	33.39	NonToxin	NonToxin	GAAZ01000277|Crotalus_horridus Beta-centractin-like protein
SB0265VGL_bridger_k30_4681	42.47	79.61	NonToxin	NonToxin	GBEW01000089|Micrurus_fulvius AP-3 complex subunit sigma-1-like protein
SB0265VGL_bridger_k30_4684	2.54	11.05	NonToxin	Uncharacterized	Uncharacterized
SB0265VGL_bridger_k30_4696	38.08	26.03	NonToxin	NonToxin	ENSPVIG00000016910|ENSPVIP00000022422|RPA1 RPA1 replication protein A1 [Source:NCBI gene;Acc:110084309]
SB0265VGL_bridger_k30_4698	41.66	42.55	NonToxin	NonToxin	GAAZ01000214|Crotalus_horridus arrestin, beta 2-like protein
SB0265VGL_bridger_k30_4710	39.57	56.39	NonToxin	NonToxin	GBEX01001603|Crotalus_adamanteus Integral membrane protein 2B
SB0265VGL_bridger_k30_4715	41.6	130.28	NonToxin	NonToxin	ENSNSUP00000002447,1|TMED10 TMED10 transmembrane p24 trafficking protein 10 [Source:HGNC Symbol;Acc:HGNC:16998]
SB0265VGL_bridger_k30_4722	34.49	65.83	NonToxin	NonToxin	GAAZ01000283|Crotalus_horridus Biglycan-like protein
SB0265VGL_bridger_k30_4750	41.74	83.94	NonToxin	NonToxin	GBSH01002760|Boiga_irregularis Thioredoxin domain-containing protein 15-like
SB0265VGL_bridger_k30_4756	34.64	70.43	NonToxin	NonToxin	eukaryotic translation elongation factor 1 epsilon 1
SB0265VGL_bridger_k30_4758	13.85	44.53	NonToxin	NonToxin	GAAZ01000593|Crotalus_horridus C-terminal-binding protein 1
SB0265VGL_bridger_k30_4762	21.13	18.88	NonToxin	NonToxin	GBEX01003629|Crotalus_adamanteus transmembrane 9 superfamily member 4
SB0265VGL_bridger_k30_4766	25.22	59.32	NonToxin	Uncharacterized	Uncharacterized
SB0265VGL_bridger_k30_4777	45.31	30.55	NonToxin	NonToxin	GAAZ01001166|Crotalus_horridus Integrin-linked protein kinase
SB0265VGL_bridger_k30_4795	32.04	46.33	NonToxin	NonToxin	GBSI01001391|Hypsiglena_sp,_JMG-2014 mitotic-spindle organizing protein 1
SB0265VGL_bridger_k30_4824	32.53	7.51	NonToxin	Uncharacterized	Uncharacterized
SB0265VGL_bridger_k30_4832	42.54	30.93	NonToxin	NonToxin	GBEX01003931|Crotalus_adamanteus Vacuolar protein sorting 45-like protein
SB0265VGL_bridger_k30_4834	36.88	119.75	NonToxin	NonToxin	GDAY02002403|Agkistrodon_contortrix_contortrix Stress-induced-phosphoprotein 1-like protein
SB0265VGL_bridger_k30_4840	12.57	27.94	NonToxin	NonToxin	ENSNSUP00000005528,1|SERINC1 SERINC1 serine incorporator 1 [Source:HGNC Symbol;Acc:HGNC:13464]
SB0265VGL_bridger_k30_4854	32.07	40.54	NonToxin	NonToxin	GBEX01000783|Crotalus_adamanteus COP9 signalosome complex subunit 8-like protein
SB0265VGL_bridger_k30_4885	11.68	30.33	NonToxin	NonToxin	GBSH01001183|Boiga_irregularis glycoprotein-N-acetylgalactosamine
SB0265VGL_bridger_k30_4906	18.9	51.18	NonToxin	NonToxin	ENSPVIG00000012809|ENSPVIP00000016560|HNRNPM HNRNPM heterogeneous nuclear ribonucleoprotein M [Source:NCBI gene;Acc:110072452]
SB0265VGL_bridger_k30_4924	22.62	23.82	NonToxin	NonToxin	glutaredoxin 2
SB0265VGL_bridger_k30_4949	34.8	93.12	NonToxin	Uncharacterized	Uncharacterized
SB0265VGL_bridger_k30_4966	16.86	22.4	NonToxin	NonToxin	GDAY02000769|Agkistrodon_contortrix_contortrix putative RNA-binding protein EIF1AD-like
SB0265VGL_bridger_k30_4976	35.46	114.02	NonToxin	NonToxin	GAAZ01000625|Crotalus_horridus Cytochrome b-c1 complex subunit 2,
SB0265VGL_bridger_k30_4977	18.74	13.57	NonToxin	NonToxin	Zinc finger, RING-type
SB0265VGL_bridger_k30_5002	39.42	41.13	NonToxin	NonToxin	ENSNSUP00000022239,1
SB0265VGL_bridger_k30_5007	11.66	9.67	NonToxin	NonToxin	GAAZ01001428|Crotalus_horridus Mimecan
SB0265VGL_bridger_k30_5022	18.24	48.89	NonToxin	Uncharacterized	Uncharacterized
SB0265VGL_bridger_k30_5025	15.4	25.96	NonToxin	NonToxin	ENSACAG00000011896|ENSACAP00000011973|CHUK CHUK component of inhibitor of nuclear factor kappa B kinase complex [Source:NCBI gene;Acc:100565922]
SB0265VGL_bridger_k30_5033	38.13	56.56	NonToxin	NonToxin	GDAY02000117|Agkistrodon_contortrix_contortrix Aldehyde dehydrogenase 3 A2
SB0265VGL_bridger_k30_5051	30.63	19.05	NonToxin	NonToxin	GBEX01001413|Crotalus_adamanteus Golgi integral membrane protein 4
SB0265VGL_bridger_k30_5058	37.17	90.09	NonToxin	NonToxin	GDAY02000609|Agkistrodon_contortrix_contortrix Cytochrome b-c1 complex subunit 1, mitochondrial
SB0265VGL_bridger_k30_5065	24.25	74.15	NonToxin	NonToxin	GAAZ01002314|Crotalus_horridus Serine/threonine-protein phosphatase 2A
SB0265VGL_bridger_k30_5070	28.46	33.72	NonToxin	NonToxin	ENSPVIG00000010729|ENSPVIP00000013873|MYL2 MYL2 myosin light chain 2 [Source:NCBI gene;Acc:110083871]
SB0265VGL_bridger_k30_5076	19.91	52.56	NonToxin	NonToxin	GBEX01001563|Crotalus_adamanteus Heparan sulfate glucosamine 3-O-sulfotransferase
SB0265VGL_bridger_k30_5081	27.18	140.41	NonToxin	NonToxin	GDAY02001990|Agkistrodon_contortrix_contortrix reticulocalbin 1, EF-hand calcium binding
SB0265VGL_bridger_k30_5088	34.33	25.65	NonToxin	NonToxin	GAAZ01001411|Crotalus_horridus Alpha-1,6-mannosyl-glycoprotein
SB0265VGL_bridger_k30_5094	48.93	7.19	NonToxin	Uncharacterized	Uncharacterized
SB0265VGL_bridger_k30_5099	46.85	62.13	NonToxin	Uncharacterized	Uncharacterized
SB0265VGL_bridger_k30_5104	41.85	120.96	NonToxin	Uncharacterized	Uncharacterized
SB0265VGL_bridger_k30_5105	19.76	53.89	NonToxin	NonToxin	GBSH01001495|Boiga_irregularis putative protein LOC100563422
SB0265VGL_bridger_k30_5117	29.32	88.79	NonToxin	NonToxin	GDAY02002013|Agkistrodon_contortrix_contortrix Riboflavin kinase-like protein
SB0265VGL_bridger_k30_5124	40.99	68.55	NonToxin	NonToxin	GBSI01000824|Hypsiglena_sp,_JMG-2014 enhancer of yellow 2 transcription factor -like
SB0265VGL_bridger_k30_5134	32.77	57.82	NonToxin	NonToxin	GDAY02000507|Agkistrodon_contortrix_contortrix Clusterin
SB0265VGL_bridger_k30_5152	23.56	59.87	NonToxin	NonToxin	GDAY02000776|Agkistrodon_contortrix_contortrix emerin-like protein
SB0265VGL_bridger_k30_5155	41.61	55.07	NonToxin	NonToxin	biogenesis of lysosomal organelles complex-1, subunit 2
SB0265VGL_bridger_k30_5177	28.92	57.26	NonToxin	NonToxin	GDAY02001974|Agkistrodon_contortrix_contortrix Neutral and basic amino acid transport protein
SB0265VGL_bridger_k30_5207	31.78	17.15	NonToxin	NonToxin	GAAZ01000505|Crotalus_horridus chitinase-3-like protein 1-like protein
SB0265VGL_bridger_k30_5209	29.87	14.81	NonToxin	NonToxin	GBEX01003636|Crotalus_adamanteus TNF receptor-associated factor 4
SB0265VGL_bridger_k30_5229	26.92	41.79	NonToxin	NonToxin	GAAZ01000993|Crotalus_horridus glyoxalase domain-containing protein 4-like
SB0265VGL_bridger_k30_5230	35.33	142.72	NonToxin	NonToxin	GAAZ01002237|Crotalus_horridus SEC13-like protein
SB0265VGL_bridger_k30_5257	8.26	8.05	NonToxin	NonToxin	GAAZ01002419|Crotalus_horridus stAR-related lipid transfer protein 4-like
SB0265VGL_bridger_k30_528	1762.5	3709.95	NonToxin	NonToxin	GAAZ01001034|Crotalus_horridus 78 kDa glucose-regulated protein
SB0265VGL_bridger_k30_5304	47.98	87.81	NonToxin	NonToxin	GBEX01002580|Crotalus_adamanteus Peptidyl-prolyl cis-trans isomerase H
SB0265VGL_bridger_k30_5305	12.25	53.27	NonToxin	NonToxin	GAAZ01000616|Crotalus_horridus Cysteine and glycine-rich protein 1-like
SB0265VGL_bridger_k30_5310	34.95	67.55	NonToxin	NonToxin	ENSNSUP00000011317,1|YIPF3 YIPF3 Yip1 domain family member 3 [Source:HGNC Symbol;Acc:HGNC:21023]
SB0265VGL_bridger_k30_5331	13.73	52.12	NonToxin	NonToxin	GAAZ01000095|Crotalus_horridus ADP-ribosylation factor-like protein 4A-like
SB0265VGL_bridger_k30_5352	18.1	71.25	NonToxin	Uncharacterized	Uncharacterized
SB0265VGL_bridger_k30_5365	36.95	93.13	NonToxin	NonToxin	GBEW01000144|Micrurus_fulvius putative protein BRICK1-like protein
SB0265VGL_bridger_k30_537	1412.21	1779.2	NonToxin	NonToxin	GAAZ01001720|Crotalus_horridus Parvalbumin
SB0265VGL_bridger_k30_5373	20.11	17.37	NonToxin	NonToxin	GBEX01002812|Crotalus_adamanteus rho-related GTP-binding protein RhoB precursor
SB0265VGL_bridger_k30_5404	22.76	20.82	NonToxin	Uncharacterized	Uncharacterized
SB0265VGL_bridger_k30_5406	13.86	20.42	NonToxin	NonToxin	ENSNSUP00000027534,1|PXN PXN paxillin [Source:HGNC Symbol;Acc:HGNC:9718]
SB0265VGL_bridger_k30_5416	35.86	126.32	NonToxin	NonToxin	GDAY02000045|Agkistrodon_contortrix_contortrix Actin-related protein 2/3 complex subunit 3-like
SB0265VGL_bridger_k30_5418	13.74	64.95	NonToxin	NonToxin	GBEX01000589|Crotalus_adamanteus Caspase-6-like protein
SB0265VGL_bridger_k30_5420	23.52	73.99	NonToxin	NonToxin	GDAY02002908|Agkistrodon_contortrix_contortrix Voltage-dependent anion-selective channel
SB0265VGL_bridger_k30_5438	22.88	17.23	NonToxin	NonToxin	GBEX01002327|Crotalus_adamanteus forkhead box O4
SB0265VGL_bridger_k30_5439	32.48	57.44	NonToxin	NonToxin	GAAZ01000781|Crotalus_horridus Electron transfer flavoprotein subunit beta-like
SB0265VGL_bridger_k30_5440	15.18	36.99	NonToxin	NonToxin	GBSI01001338|Hypsiglena_sp,_JMG-2014 mediator of RNA polymerase II transcription
SB0265VGL_bridger_k30_5450	44.53	81.57	NonToxin	Uncharacterized	Uncharacterized
SB0265VGL_bridger_k30_546	1804.73	1583.45	NonToxin	NonToxin	GAAZ01002175|Crotalus_horridus 40S ribosomal protein S11
SB0265VGL_bridger_k30_5462	42.19	78.5	NonToxin	NonToxin	GAAZ01002231|Crotalus_horridus Ribosome maturation protein SBDS
SB0265VGL_bridger_k30_5484	29.77	12.54	NonToxin	NonToxin	ENSACAG00000014472|ENSACAP00000014199|LAMTOR1 LAMTOR1 late endosomal/lysosomal adaptor, MAPK and MTOR activator 1 [Source:NCBI gene;Acc:100566454]
SB0265VGL_bridger_k30_5496	16.17	32.52	NonToxin	NonToxin	GDAY02002347|Agkistrodon_contortrix_contortrix hypothetical protein
SB0265VGL_bridger_k30_5564	16	34.94	NonToxin	NonToxin	GBEX01002662|Crotalus_adamanteus Proteolipid protein 2-like protein
SB0265VGL_bridger_k30_560	1474.25	1506.11	NonToxin	NonToxin	GAAZ01002137|Crotalus_horridus 60S ribosomal protein L18
SB0265VGL_bridger_k30_5603	36.91	22.67	NonToxin	NonToxin	GAAZ01002083|Crotalus_horridus RING finger protein 121
SB0265VGL_bridger_k30_5633	14.14	52.62	NonToxin	NonToxin	GAAZ01001221|Crotalus_horridus GTPase KRas-like protein
SB0265VGL_bridger_k30_5638	30.84	101.84	NonToxin	NonToxin	GAAZ01000561|Crotalus_horridus Complement component 1 Q subcomponent-binding
SB0265VGL_bridger_k30_5639	9.12	18.36	NonToxin	Uncharacterized	Uncharacterized
SB0265VGL_bridger_k30_5663	6.68	136.11	NonToxin	NonToxin	GDAY02000295|Agkistrodon_contortrix_contortrix protein BTG2-like protein
SB0265VGL_bridger_k30_5667	20.68	30.81	NonToxin	NonToxin	GAAZ01000968|Crotalus_horridus Glutamine synthetase-like protein
SB0265VGL_bridger_k30_5674	17.46	26.15	NonToxin	NonToxin	ENSNSUP00000019040,1|WDTC1 WDTC1 WD and tetratricopeptide repeats 1 [Source:HGNC Symbol;Acc:HGNC:29175]
SB0265VGL_bridger_k30_571	1.17	10.07	NonToxin	Uncharacterized	Uncharacterized
SB0265VGL_bridger_k30_5713	18.91	73.01	NonToxin	Uncharacterized	Uncharacterized
SB0265VGL_bridger_k30_5714	30.17	57.22	NonToxin	NonToxin	GDAY02002570|Agkistrodon_contortrix_contortrix thioredoxin-like protein 1-like
SB0265VGL_bridger_k30_572	1406.65	2358.7	NonToxin	NonToxin	GAAZ01002198|Crotalus_horridus 40S ribosomal protein S4
SB0265VGL_bridger_k30_5726	6.59	50.23	NonToxin	NonToxin	isthmin 1, angiogenesis inhibitor
SB0265VGL_bridger_k30_573	1266.95	914.29	NonToxin	NonToxin	GBEW01000846|Micrurus_fulvius 60S ribosomal protein L15
SB0265VGL_bridger_k30_5737	3.69	51.38	NonToxin	Uncharacterized	Uncharacterized
SB0265VGL_bridger_k30_5750	18.61	31.86	NonToxin	NonToxin	exoribonuclease 1
SB0265VGL_bridger_k30_5758	34.71	15.01	NonToxin	NonToxin	ENSPVIG00000020845|ENSPVIP00000028076|CLPB CLPB ClpB homolog, mitochondrial AAA ATPase chaperonin [Source:NCBI gene;Acc:110078092]
SB0265VGL_bridger_k30_5778	23.56	25.04	NonToxin	Uncharacterized	Uncharacterized
SB0265VGL_bridger_k30_5786	35.93	76.85	NonToxin	NonToxin	GBEX01003496|Crotalus_adamanteus Thioredoxin domain-containing protein 9
SB0265VGL_bridger_k30_5791	28.77	35.01	NonToxin	NonToxin	ENSNSUP00000023469,1|MIEN1 MIEN1 migration and invasion enhancer 1 [Source:HGNC Symbol;Acc:HGNC:28230]
SB0265VGL_bridger_k30_5809	6.97	31.58	NonToxin	Uncharacterized	Uncharacterized
SB0265VGL_bridger_k30_582	1425.71	2135.89	NonToxin	NonToxin	GAAZ01002171|Crotalus_horridus 60S acidic ribosomal protein P0
SB0265VGL_bridger_k30_583	929.52	1636.26	NonToxin	NonToxin	ribonuclease P/MRP 38kDa subunit
SB0265VGL_bridger_k30_584	1393.8	1947.14	NonToxin	NonToxin	GAAZ01002153|Crotalus_horridus 60S ribosomal protein L35
SB0265VGL_bridger_k30_5840	30.74	54.37	NonToxin	NonToxin	GAAZ01002678|Crotalus_horridus Mitochondrial import receptor subunit tom5-like
SB0265VGL_bridger_k30_5841	20.42	41.36	NonToxin	NonToxin	GDAY02002390|Agkistrodon_contortrix_contortrix stAR-related lipid transfer protein 5-like
SB0265VGL_bridger_k30_5844	29.37	51.94	NonToxin	Uncharacterized	Uncharacterized
SB0265VGL_bridger_k30_5852	35.3	33.26	NonToxin	NonToxin	GAAZ01000699|Crotalus_horridus diphosphomevalonate decarboxylase-like protein
SB0265VGL_bridger_k30_5856	20.73	22.16	NonToxin	NonToxin	mitochondrial ribosomal protein S10
SB0265VGL_bridger_k30_5861	16	46.06	NonToxin	NonToxin	GBSI01000792|Hypsiglena_sp,_JMG-2014 Enoyl-CoA hydratase
SB0265VGL_bridger_k30_5875	31.36	39.41	NonToxin	NonToxin	GDAY02002599|Agkistrodon_contortrix_contortrix translation initiation factor eIF-2B subunit
SB0265VGL_bridger_k30_5876	22.34	19.66	NonToxin	NonToxin	GBEX01001982|Crotalus_adamanteus MGC84775 protein
SB0265VGL_bridger_k30_5882	25.86	24.33	NonToxin	NonToxin	mitochondrial ribosome recycling factor
SB0265VGL_bridger_k30_5883	11.87	8.24	NonToxin	NonToxin	mitochondrial ribosome recycling factor
SB0265VGL_bridger_k30_5891	38.31	86.7	NonToxin	NonToxin	GBSH01001633|Boiga_irregularis Mitotic-spindle organizing protein 2A-like
SB0265VGL_bridger_k30_5893	13.32	41.02	NonToxin	NonToxin	GAAZ01000407|Crotalus_horridus Calpain-2 catalytic subunit-like protein
SB0265VGL_bridger_k30_5926	12.52	21.7	NonToxin	NonToxin	GAAZ01000611|Crotalus_horridus Cyclin-Y-like protein 1-B-like protein
SB0265VGL_bridger_k30_5932	10.15	48.47	NonToxin	NonToxin	GDAY02000148|Agkistrodon_contortrix_contortrix Progressive ankylosis protein-like protein
SB0265VGL_bridger_k30_5940	18.59	50.17	NonToxin	NonToxin	GBEX01000263|Crotalus_adamanteus Protein archease
SB0265VGL_bridger_k30_5941	4.31	11.93	NonToxin	Uncharacterized	Uncharacterized
SB0265VGL_bridger_k30_596	1034.46	1485.88	NonToxin	NonToxin	ENSNSUP00000021162,1
SB0265VGL_bridger_k30_5966	21.86	108.59	NonToxin	NonToxin	GAAZ01001295|Crotalus_horridus Hypothetical protein LOC100561402
SB0265VGL_bridger_k30_5979	22.72	17.91	NonToxin	NonToxin	|ENSPVIG00000018392|ENSPVIP00000024442| ankyrin repeat domain 23 [Source:NCBI gene;Acc:110072135]
SB0265VGL_bridger_k30_599	958.07	3746.85	NonToxin	NonToxin	GAAZ01000757|Crotalus_horridus Elongation factor 1-alpha 1
SB0265VGL_bridger_k30_6001	36.71	60.89	NonToxin	NonToxin	GAAZ01000225|Crotalus_horridus Copper transport protein ATOX1-like protein
SB0265VGL_bridger_k30_6009	9.37	24.85	NonToxin	Uncharacterized	Uncharacterized
SB0265VGL_bridger_k30_6022	28.37	20.25	NonToxin	Uncharacterized	Uncharacterized
SB0265VGL_bridger_k30_6033	33.24	20.57	NonToxin	Uncharacterized	Uncharacterized
SB0265VGL_bridger_k30_6035	29.24	69.96	NonToxin	Uncharacterized	Uncharacterized
SB0265VGL_bridger_k30_6054	26.93	37.93	NonToxin	NonToxin	GAAZ01002962|Crotalus_horridus Wnt-4 protein
SB0265VGL_bridger_k30_6060	16.31	38.95	NonToxin	NonToxin	ENSNSUP00000005862,1|GNS GNS glucosamine (N-acetyl)-6-sulfatase [Source:HGNC Symbol;Acc:HGNC:4422]
SB0265VGL_bridger_k30_6069	46.26	85.53	NonToxin	NonToxin	GAAZ01001870|Crotalus_horridus Prefoldin subunit 4-like protein
SB0265VGL_bridger_k30_6079	26.73	34.52	NonToxin	NonToxin	ENSNSUP00000013551,1|LSM7 LSM7 LSM7 homolog, U6 small nuclear RNA and mRNA degradation associated [Source:HGNC Symbol;Acc:HGNC:20470]
SB0265VGL_bridger_k30_6099	11.87	15.55	NonToxin	NonToxin	GBEX01003042|Crotalus_adamanteus sodium-dependent multivitamin transporter
SB0265VGL_bridger_k30_6103	21.86	67.53	NonToxin	NonToxin	GDAY02002900|Agkistrodon_contortrix_contortrix Vesicle-associated membrane protein-associated
SB0265VGL_bridger_k30_6109	20.73	61.4	NonToxin	NonToxin	GAAZ01002679|Crotalus_horridus Torsin-1A-like protein
SB0265VGL_bridger_k30_6116	15.21	16.08	NonToxin	NonToxin	GDAY02000376|Agkistrodon_contortrix_contortrix Calpain-1 catalytic subunit-like protein
SB0265VGL_bridger_k30_6128	16.84	61.95	NonToxin	NonToxin	GDAY02000535|Agkistrodon_contortrix_contortrix COP9 signalosome complex subunit 3
SB0265VGL_bridger_k30_6136	29.28	46.14	NonToxin	NonToxin	GAAZ01001933|Crotalus_horridus 26S proteasome non-ATPase regulatory subunit
SB0265VGL_bridger_k30_6179	16.8	69.93	NonToxin	NonToxin	GBEX01000285|Crotalus_adamanteus Aspartate aminotransferase, cytoplasmic-like
SB0265VGL_bridger_k30_619	21.5	69.73	NonToxin	NonToxin	LUC7-like 3 pre-mRNA splicing factor
SB0265VGL_bridger_k30_6227	15.21	51.44	NonToxin	Uncharacterized	Uncharacterized
SB0265VGL_bridger_k30_6235	18.65	40.57	NonToxin	NonToxin	GAAZ01002512|Crotalus_horridus Tetraspanin-31-like protein
SB0265VGL_bridger_k30_6244	26.97	49.7	NonToxin	NonToxin	GBSH01002824|Boiga_irregularis transmembrane protein 54
SB0265VGL_bridger_k30_6248	25.34	63.51	NonToxin	NonToxin	ENSNSUP00000022511,1|HTATSF1 HTATSF1 HIV-1 Tat specific factor 1 [Source:HGNC Symbol;Acc:HGNC:5276]
SB0265VGL_bridger_k30_6260	11.58	17.05	NonToxin	NonToxin	ENSPVIG00000007845|ENSPVIP00000009868|ACP1 ACP1 acid phosphatase 1 [Source:NCBI gene;Acc:110073427]
SB0265VGL_bridger_k30_6270	30.34	33.91	NonToxin	NonToxin	GBEW01000645|Micrurus_fulvius Amino-terminal enhancer of split-like protein
SB0265VGL_bridger_k30_6280	36.58	27.18	NonToxin	NonToxin	GBSH01002313|Boiga_irregularis Repressor of RNA polymerase III transcription
SB0265VGL_bridger_k30_6285	27.45	77.77	NonToxin	NonToxin	GBSH01002066|Boiga_irregularis Prenylated Rab acceptor protein 1
SB0265VGL_bridger_k30_6299	10.18	41.37	NonToxin	NonToxin	ENSNSUP00000022892,1|CRACR2B CRACR2B calcium release activated channel regulator 2B [Source:HGNC Symbol;Acc:HGNC:28703]
SB0265VGL_bridger_k30_6322	32.28	72.36	NonToxin	NonToxin	GAAZ01002405|Crotalus_horridus pre-mRNA-splicing factor SPF27-like protein
SB0265VGL_bridger_k30_633	821.08	1859.22	NonToxin	NonToxin	GBEW01000887|Micrurus_fulvius 40S ribosomal protein S17
SB0265VGL_bridger_k30_6330	6.75	25.06	NonToxin	NonToxin	GBEX01001955|Crotalus_adamanteus guanosine-3',5'-bis(diphosphate)
SB0265VGL_bridger_k30_635	710.02	1066.31	NonToxin	Uncharacterized	Uncharacterized
SB0265VGL_bridger_k30_6366	30.13	80.48	NonToxin	NonToxin	ENSPVIG00000009262|ENSPVIP00000011829|MAPK3 MAPK3 mitogen-activated protein kinase 3 [Source:NCBI gene;Acc:110081803]
SB0265VGL_bridger_k30_6385	18.63	23.51	NonToxin	NonToxin	GBSH01001730|Boiga_irregularis NAD-dependent deacetylase sirtuin-6-like
SB0265VGL_bridger_k30_640	1457.79	944.38	NonToxin	Uncharacterized	Uncharacterized
SB0265VGL_bridger_k30_6401	9.51	54.6	NonToxin	NonToxin	ENSNSUP00000015102,1
SB0265VGL_bridger_k30_6403	31.79	62.53	NonToxin	NonToxin	GBSI01000907|Hypsiglena_sp,_JMG-2014 Iron-sulfur cluster assembly 1, protein
SB0265VGL_bridger_k30_6415	23.8	73.09	NonToxin	NonToxin	ENSNSUP00000002550,1|PIN4 PIN4 peptidylprolyl cis/trans isomerase, NIMA-interacting 4 [Source:HGNC Symbol;Acc:HGNC:8992]
SB0265VGL_bridger_k30_645	773.02	1932.25	NonToxin	NonToxin	GBEX01002921|Crotalus_adamanteus 60S ribosomal protein L18a
SB0265VGL_bridger_k30_6502	32.61	74.72	NonToxin	NonToxin	ENSNSUP00000003291,1|BUD31 BUD31 BUD31 homolog [Source:HGNC Symbol;Acc:HGNC:29629]
SB0265VGL_bridger_k30_6519	11.16	3.51	NonToxin	NonToxin	GBEX01001858|Crotalus_adamanteus LSM10, U7 small nuclear RNA associated
SB0265VGL_bridger_k30_6548	18.69	43.34	NonToxin	NonToxin	GAAZ01002652|Crotalus_horridus Transmembrane protein 33
SB0265VGL_bridger_k30_6558	20.66	26.29	NonToxin	NonToxin	GAAZ01001041|Crotalus_horridus developmentally-regulated GTP-binding protein 2
SB0265VGL_bridger_k30_6564	7.43	71.65	NonToxin	Uncharacterized	Uncharacterized
SB0265VGL_bridger_k30_6580	16.45	38.99	NonToxin	NonToxin	GDAY02000113|Agkistrodon_contortrix_contortrix alanyl-tRNA synthetase
SB0265VGL_bridger_k30_66	22.16	27.7	NonToxin	NonToxin	GBEX01003653|Crotalus_adamanteus traB domain-containing protein-like protein
SB0265VGL_bridger_k30_6607	14.49	30.43	NonToxin	NonToxin	GBEW01000755|Micrurus_fulvius 26S proteasome non-ATPase regulatory subunit 14
SB0265VGL_bridger_k30_6610||GAAZ01001026|Crotalus_horridus_Grainyhead-like_protein_1	10.31	27.39	NonToxin	NonToxin	GAAZ01001026|Crotalus_horridus_Grainyhead-like_protein_1
SB0265VGL_bridger_k30_6619	29.15	20.3	NonToxin	NonToxin	DiGeorge syndrome critical region gene 2
SB0265VGL_bridger_k30_6630	16.13	28.42	NonToxin	NonToxin	GDAY02002058|Agkistrodon_contortrix_contortrix ATP-dependent RNA helicase DDX19B
SB0265VGL_bridger_k30_664	924.6	1459.53	NonToxin	NonToxin	GAAZ01000762|Crotalus_horridus Elongation factor 2
SB0265VGL_bridger_k30_6640	7.88	22.04	NonToxin	NonToxin	GAAZ01000826|Crotalus_horridus Putative ergosterol biosynthetic protein 28-like
SB0265VGL_bridger_k30_6648	14.97	20.66	NonToxin	NonToxin	GAAZ01000167|Crotalus_horridus Ankyrin repeat domain-containing protein 39-like
SB0265VGL_bridger_k30_6651	23.62	34.7	NonToxin	NonToxin	GBEW01001100|Micrurus_fulvius Transmembrane protein 85
SB0265VGL_bridger_k30_6660	8.26	25.93	NonToxin	Uncharacterized	Uncharacterized
SB0265VGL_bridger_k30_6675	23.85	11.96	NonToxin	Uncharacterized	Uncharacterized
SB0265VGL_bridger_k30_6689	25.27	42.15	NonToxin	NonToxin	GAAZ01002780|Crotalus_horridus Ubiquitin-binding protein
SB0265VGL_bridger_k30_6707	21.91	23.27	NonToxin	NonToxin	GDAY02000193|Agkistrodon_contortrix_contortrix arf-GAP with coiled-coil, ANK repeat and PH
SB0265VGL_bridger_k30_6717	19.31	101.31	NonToxin	NonToxin	GDAY02002931|Agkistrodon_contortrix_contortrix V-type proton ATPase subunit D
SB0265VGL_bridger_k30_6724	22.52	64.25	NonToxin	NonToxin	GAAZ01002718|Crotalus_horridus 4-trimethylaminobutyraldehyde dehydrogenase-like
SB0265VGL_bridger_k30_673	792.09	938.39	NonToxin	NonToxin	GBEW01000906|Micrurus_fulvius 40S ribosomal protein S9
SB0265VGL_bridger_k30_6730	24.67	11.21	NonToxin	Uncharacterized	Uncharacterized
SB0265VGL_bridger_k30_6740	25.21	4.07	NonToxin	NonToxin	GAAZ01001952|Crotalus_horridus pyrroline-5-carboxylate reductase 3-like
SB0265VGL_bridger_k30_678	89.22	126.18	NonToxin	NonToxin	sodium channel, voltage gated, type II beta subunit
SB0265VGL_bridger_k30_6813	19.48	30.98	NonToxin	NonToxin	GAAZ01000387|Crotalus_horridus CAAX prenyl protease 1-like protein
SB0265VGL_bridger_k30_683	1197.92	1885.53	NonToxin	NonToxin	GBEW01000882|Micrurus_fulvius 40S ribosomal protein S13
SB0265VGL_bridger_k30_6835	18.86	22.99	NonToxin	NonToxin	ENSPVIG00000014824|ENSPVIP00000019426|FXR1 FXR1 FMR1 autosomal homolog 1 [Source:NCBI gene;Acc:110087621]
SB0265VGL_bridger_k30_6839	4.45	4.18	NonToxin	Uncharacterized	Uncharacterized
SB0265VGL_bridger_k30_6840	24.36	51.31	NonToxin	NonToxin	GBEX01001591|Crotalus_adamanteus Isocitrate dehydrogenase (NAD) subunit gamma 1,
SB0265VGL_bridger_k30_6865	9.72	23.94	NonToxin	NonToxin	ENSNSUP00000028170,1
SB0265VGL_bridger_k30_6871	15.86	23.33	NonToxin	NonToxin	GDAY02000185|Agkistrodon_contortrix_contortrix apoptosis regulator
SB0265VGL_bridger_k30_6877	28.67	80.68	NonToxin	NonToxin	GBEW01000988|Micrurus_fulvius Small nuclear ribonucleoprotein Sm D2
SB0265VGL_bridger_k30_6879	26.18	17.4	NonToxin	NonToxin	GDAY02002843|Agkistrodon_contortrix_contortrix E3 ubiquitin-protein ligase MARCH2
SB0265VGL_bridger_k30_6885	21.29	34.65	NonToxin	NonToxin	hypoxia inducible factor 1, alpha subunit inhibitor
SB0265VGL_bridger_k30_6888	1.49	5.79	NonToxin	Uncharacterized	Uncharacterized
SB0265VGL_bridger_k30_69	212.97	141.39	NonToxin	NonToxin	GAAZ01002893|Crotalus_horridus Vacuolar protein sorting-associated protein 28
SB0265VGL_bridger_k30_690	937.55	2398.75	NonToxin	NonToxin	ENSNSUP00000008065,1
SB0265VGL_bridger_k30_6900	12.02	42.51	NonToxin	NonToxin	GBEX01001348|Crotalus_adamanteus GDP-fucose transporter 1-like protein
SB0265VGL_bridger_k30_691	868.04	1471.31	NonToxin	Uncharacterized	Uncharacterized
SB0265VGL_bridger_k30_6930	9.78	22.46	NonToxin	Uncharacterized	Uncharacterized
SB0265VGL_bridger_k30_6957	18.35	65.6	NonToxin	NonToxin	GAAZ01000931|Crotalus_horridus Fructose-bisphosphate aldolase B-like protein
SB0265VGL_bridger_k30_6980	14.38	38.3	NonToxin	NonToxin	GDAY02002610|Agkistrodon_contortrix_contortrix Eukaryotic translation initiation factor 6-like
SB0265VGL_bridger_k30_6988	19.7	53.69	NonToxin	NonToxin	GAAZ01002791|Crotalus_horridus Ubiquitin-conjugating enzyme E2 J1-like protein
SB0265VGL_bridger_k30_6989	23.9	32.45	NonToxin	NonToxin	transmembrane protein 11
SB0265VGL_bridger_k30_6999	41.93	41.22	NonToxin	NonToxin	GAAZ01001152|Crotalus_horridus mitochondrial import inner membrane translocase
SB0265VGL_bridger_k30_700	866.4	1140.32	NonToxin	NonToxin	ENSACAG00000010291|ENSACAP00000010092|RPL37 RPL37 ribosomal protein L37 [Source:NCBI gene;Acc:100560565]
SB0265VGL_bridger_k30_7001	17.46	23.72	NonToxin	NonToxin	GAAZ01002924|Crotalus_horridus Vacuolar ATPase assembly integral membrane
SB0265VGL_bridger_k30_701	884.06	2439.87	NonToxin	NonToxin	GAAZ01001532|Crotalus_horridus Myosin light chain
SB0265VGL_bridger_k30_7016	17.94	33.51	NonToxin	NonToxin	GDAY02001403|Agkistrodon_contortrix_contortrix putative mitochondrial carrier protein MGC4399
SB0265VGL_bridger_k30_7028	15.97	53.98	NonToxin	Uncharacterized	Uncharacterized
SB0265VGL_bridger_k30_704	823.25	1157.4	NonToxin	Uncharacterized	Uncharacterized
SB0265VGL_bridger_k30_7060	17.82	35.44	NonToxin	NonToxin	GBEX01000321|Crotalus_adamanteus ATP synthase mitochondrial F1 complex assembly
SB0265VGL_bridger_k30_7067	11.14	20.44	NonToxin	NonToxin	GBEX01000370|Crotalus_adamanteus beta-galactosidase-like
SB0265VGL_bridger_k30_7075	3.69	1.61	NonToxin	Uncharacterized	Uncharacterized
SB0265VGL_bridger_k30_7076	19.12	13.02	NonToxin	NonToxin	GBEX01003546|Crotalus_adamanteus mitochondrial import inner membrane translocase
SB0265VGL_bridger_k30_7086	25.22	65.53	NonToxin	NonToxin	GBEW01000912|Micrurus_fulvius Histone deacetylase complex subunit SAP18-like
SB0265VGL_bridger_k30_709	719.4	1577.29	NonToxin	NonToxin	GAAZ01002184|Crotalus_horridus 40S ribosomal protein S19
SB0265VGL_bridger_k30_7106	26.47	74.16	NonToxin	NonToxin	GDAY02000011|Agkistrodon_contortrix_contortrix 39S ribosomal protein L21, mitochondrial-like
SB0265VGL_bridger_k30_7112	20.65	32.11	NonToxin	Uncharacterized	Uncharacterized
SB0265VGL_bridger_k30_7120	25.92	39.3	NonToxin	NonToxin	ENSNSUP00000027128,1
SB0265VGL_bridger_k30_7131	26.35	45.91	NonToxin	NonToxin	Zinc finger, RING-type
SB0265VGL_bridger_k30_7136	18.41	51.08	NonToxin	NonToxin	GDAY02001751|Agkistrodon_contortrix_contortrix phosducin-like protein 3-like protein
SB0265VGL_bridger_k30_7194	14.57	17.92	NonToxin	NonToxin	GBSH01002087|Boiga_irregularis Protein max-like
SB0265VGL_bridger_k30_7294	18.69	17.8	NonToxin	Uncharacterized	Uncharacterized
SB0265VGL_bridger_k30_7307	13.55	46.53	NonToxin	NonToxin	GBEX01000874|Crotalus_adamanteus Cytochrome b reductase 1
SB0265VGL_bridger_k30_7309	12.32	101.6	NonToxin	Uncharacterized	Uncharacterized
SB0265VGL_bridger_k30_7337	17.86	61.66	NonToxin	NonToxin	GAAZ01002431|Crotalus_horridus Succinate-CoA ligase, GDP-forming, alpha
SB0265VGL_bridger_k30_7341	22.45	28.05	NonToxin	NonToxin	ENSPVIG00000005020|ENSPVIP00000006040|C14orf119 C14orf119 chromosome unknown C14orf119 homolog [Source:NCBI gene;Acc:110071716]
SB0265VGL_bridger_k30_7343	22.61	19.65	NonToxin	NonToxin	transcription factor 25 (basic helix-loop-helix)
SB0265VGL_bridger_k30_7349	4.96	5.49	NonToxin	Uncharacterized	Uncharacterized
SB0265VGL_bridger_k30_7359	24.17	16.75	NonToxin	NonToxin	GAAZ01000030|Crotalus_horridus Putative N-acetyltransferase camello-like
SB0265VGL_bridger_k30_737	12.6	107.96	NonToxin	NonToxin	GDAY02000589|Agkistrodon_contortrix_contortrix aminoimidazole-4-carboxamide ribonucleotide
SB0265VGL_bridger_k30_7389	18.35	13.03	NonToxin	NonToxin	GAAZ01001847|Crotalus_horridus protein phosphatase 2A, regulatory subunit B
SB0265VGL_bridger_k30_7390	9.05	29.85	NonToxin	NonToxin	GDAY02000928|Agkistrodon_contortrix_contortrix Gap junction protein, gamma 1, 45kDa
SB0265VGL_bridger_k30_7394	9.19	23.73	NonToxin	NonToxin	GBEX01001906|Crotalus_adamanteus E3 ubiquitin-protein ligase makorin-1-like
SB0265VGL_bridger_k30_7397	18.99	35.33	NonToxin	NonToxin	3'(2'), 5'-bisphosphate nucleotidase 1
SB0265VGL_bridger_k30_7400	22.1	109.4	NonToxin	NonToxin	GAAZ01002930|Crotalus_horridus v-type proton ATPase subunit B, brain
SB0265VGL_bridger_k30_7422	16.88	27.67	NonToxin	NonToxin	GBSH01003119|Boiga_irregularis V-type proton ATPase subunit S1
SB0265VGL_bridger_k30_7423	12.86	32.89	NonToxin	NonToxin	GAAZ01001867|Crotalus_horridus pre-mRNA-splicing regulator WTAP
SB0265VGL_bridger_k30_746	753.23	553.39	NonToxin	NonToxin	GDAY02002717|Agkistrodon_contortrix_contortrix Translocon-associated protein subunit beta
SB0265VGL_bridger_k30_7472	17.07	26.62	NonToxin	NonToxin	GAAZ01000192|Crotalus_horridus AP-3 complex subunit mu-1
SB0265VGL_bridger_k30_7485	15.87	30.2	NonToxin	NonToxin	GAAZ01001946|Crotalus_horridus Pterin-4-alpha-carbinolamine dehydratase
SB0265VGL_bridger_k30_7496	19.11	50.06	NonToxin	NonToxin	C-type lectin domain family 3, member A
SB0265VGL_bridger_k30_7498	18.7	31.46	NonToxin	NonToxin	GAAZ01000601|Crotalus_horridus High affinity copper uptake protein 1-like
SB0265VGL_bridger_k30_7510	19.13	19.42	NonToxin	NonToxin	GAAZ01002835|Crotalus_horridus Mitochondrial ubiquitin ligase activator of NFKB
SB0265VGL_bridger_k30_7518	7.15	14.92	NonToxin	NonToxin	ENSPVIG00000000618|ENSPVIP00000000660|SYT8 SYT8 synaptotagmin 8 [Source:NCBI gene;Acc:110076549]
SB0265VGL_bridger_k30_752	1.63	2.37	NonToxin	Uncharacterized	Uncharacterized
SB0265VGL_bridger_k30_7540	23.54	64.24	NonToxin	NonToxin	GDAY02001810|Agkistrodon_contortrix_contortrix Protein N-terminal glutamine amidohydrolase
SB0265VGL_bridger_k30_7542	15.67	16.46	NonToxin	NonToxin	GBEX01000465|Crotalus_adamanteus uncharacterized protein C20orf24 homolog
SB0265VGL_bridger_k30_7546	22.1	31.73	NonToxin	NonToxin	ENSNSUP00000019128,1|CTSK CTSK cathepsin K [Source:HGNC Symbol;Acc:HGNC:2536]
SB0265VGL_bridger_k30_7566	13.96	35.8	NonToxin	NonToxin	GBEX01002015|Crotalus_adamanteus mitogen-activated protein kinase 13-like
SB0265VGL_bridger_k30_7588	19.91	56.2	NonToxin	NonToxin	GBEW01000444|Micrurus_fulvius Heterogeneous nuclear ribonucleoprotein L-like
SB0265VGL_bridger_k30_7612	15.96	36.84	NonToxin	NonToxin	GBEW01001163|Micrurus_fulvius Ubiquitin-conjugating enzyme E2 N
SB0265VGL_bridger_k30_7662	21.53	65.97	NonToxin	Uncharacterized	Uncharacterized
SB0265VGL_bridger_k30_7664	15.2	22.55	NonToxin	NonToxin	GBEX01002495|Crotalus_adamanteus phytanoyl-CoA dioxygenase, peroxisomal
SB0265VGL_bridger_k30_767	3.35	4.87	NonToxin	NonToxin	transmembrane protein 181
SB0265VGL_bridger_k30_7678	21.65	41.73	NonToxin	NonToxin	GAAZ01001856|Crotalus_horridus peptidyl-prolyl cis-trans isomerase FKBP8
SB0265VGL_bridger_k30_7679	15.86	67.87	NonToxin	NonToxin	GAAZ01000707|Crotalus_horridus DNA damage-inducible transcript 4 protein-like
SB0265VGL_bridger_k30_768	22.89	89.41	NonToxin	NonToxin	WD and tetratricopeptide repeats 1
SB0265VGL_bridger_k30_7695	16.75	49.84	NonToxin	NonToxin	GBEX01001795|Crotalus_adamanteus Leucine-rich repeat-containing protein 59-like
SB0265VGL_bridger_k30_770	18.57	56.21	NonToxin	NonToxin	GAAZ01001830|Crotalus_horridus Pyridine nucleotide-disulfide oxidoreductase
SB0265VGL_bridger_k30_7703	16.99	17.87	NonToxin	NonToxin	GAAZ01001761|Crotalus_horridus Peroxisomal membrane protein 11B-like protein
SB0265VGL_bridger_k30_7712	10.63	7.47	NonToxin	NonToxin	GDAY02000699|Agkistrodon_contortrix_contortrix DnaJ subfamily C member 16-like protein
SB0265VGL_bridger_k30_7726	13.44	48.95	NonToxin	NonToxin	GBEX01000662|Crotalus_adamanteus CDKN2AIP N-terminal-like protein
SB0265VGL_bridger_k30_7736	6.8	11.4	NonToxin	Uncharacterized	Uncharacterized
SB0265VGL_bridger_k30_7748	16.43	59.02	NonToxin	NonToxin	GBEX01002436|Crotalus_adamanteus Thioredoxin-dependent peroxide reductase,
SB0265VGL_bridger_k30_776	955.23	1753.6	NonToxin	NonToxin	GBEW01000858|Micrurus_fulvius 60S ribosomal protein L31
SB0265VGL_bridger_k30_777	751.32	1498.15	NonToxin	NonToxin	GBEW01000861|Micrurus_fulvius 60S ribosomal protein L35a
SB0265VGL_bridger_k30_7792	5.54	35.26	NonToxin	NonToxin	SRY (sex determining region Y)-box 2
SB0265VGL_bridger_k30_783	834.86	1405.94	NonToxin	NonToxin	GBEX01001076|Crotalus_adamanteus Elongation factor 1-gamma
SB0265VGL_bridger_k30_7846	20.66	76.59	NonToxin	NonToxin	GDAY02001665|Agkistrodon_contortrix_contortrix obg-like ATPase 1-like protein
SB0265VGL_bridger_k30_7906	13.36	37.35	NonToxin	NonToxin	GAAZ01001378|Crotalus_horridus Mediator of RNA polymerase II transcription
SB0265VGL_bridger_k30_7948	16.87	19.93	NonToxin	NonToxin	GDAY02002620|Agkistrodon_contortrix_contortrix hypothetical protein
SB0265VGL_bridger_k30_7950	14.68	45.03	NonToxin	NonToxin	GBEX01000903|Crotalus_adamanteus DAZ-associated protein 2-like protein
SB0265VGL_bridger_k30_7971	15.41	48.07	NonToxin	NonToxin	GAAZ01002049|Crotalus_horridus rho-related GTP-binding protein RhoC-like
SB0265VGL_bridger_k30_7987	19.66	14.38	NonToxin	Uncharacterized	Uncharacterized
SB0265VGL_bridger_k30_8018	14.46	15.86	NonToxin	Uncharacterized	Uncharacterized
SB0265VGL_bridger_k30_8019	22.7	42.52	NonToxin	NonToxin	GBEX01003736|Crotalus_adamanteus Tubulin-folding cofactor B
SB0265VGL_bridger_k30_802	655.77	1184.41	NonToxin	NonToxin	GBSI01001042|Hypsiglena_sp,_JMG-2014 guanine nucleotide binding protein (G protein),
SB0265VGL_bridger_k30_8020	2.8	14.47	NonToxin	Uncharacterized	Uncharacterized
SB0265VGL_bridger_k30_8026	17.92	44.43	NonToxin	NonToxin	GBEX01000902|Crotalus_adamanteus dapper homolog 2
SB0265VGL_bridger_k30_8049	12.75	34.71	NonToxin	NonToxin	DEAD (Asp-Glu-Ala-Asp) box helicase 1
SB0265VGL_bridger_k30_8064	21.96	59.62	NonToxin	NonToxin	GAAZ01001499|Crotalus_horridus 28S ribosomal protein S11, mitochondrial
SB0265VGL_bridger_k30_8065	17.04	44.06	NonToxin	Uncharacterized	Uncharacterized
SB0265VGL_bridger_k30_8066	6.56	26.76	NonToxin	NonToxin	ENSPVIG00000016490|ENSPVIP00000021752|BTBD10 BTBD10 BTB domain containing 10 [Source:NCBI gene;Acc:110080919]
SB0265VGL_bridger_k30_81	412.77	1422.21	NonToxin	NonToxin	GDAY02001721|Agkistrodon_contortrix_contortrix Protein disulfide-isomerase A6-like protein
SB0265VGL_bridger_k30_8112	17.55	60.67	NonToxin	NonToxin	ENSNSUP00000026742,1|PNO1 PNO1 partner of NOB1 homolog [Source:HGNC Symbol;Acc:HGNC:32790]
SB0265VGL_bridger_k30_8115	8.62	14.82	NonToxin	Uncharacterized	Uncharacterized
SB0265VGL_bridger_k30_8190	10.83	45.46	NonToxin	NonToxin	vesicle-associated membrane protein 7
SB0265VGL_bridger_k30_8199	5.82	9	NonToxin	NonToxin	chromosome 12 open reading frame 49
SB0265VGL_bridger_k30_8214	15.57	19.85	NonToxin	NonToxin	GDAY02002032|Agkistrodon_contortrix_contortrix ring finger protein 126
SB0265VGL_bridger_k30_8245	11.71	17.14	NonToxin	Uncharacterized	Uncharacterized
SB0265VGL_bridger_k30_8249	9.37	51.29	NonToxin	NonToxin	GAAZ01002572|Crotalus_horridus eukaryotic translation initiation factor 2
SB0265VGL_bridger_k30_8254	13.33	35.23	NonToxin	Uncharacterized	Uncharacterized
SB0265VGL_bridger_k30_8256	21.96	36.62	NonToxin	NonToxin	GBEW01001071|Micrurus_fulvius Mitochondrial import inner membrane translocase
SB0265VGL_bridger_k30_8257	14.3	20.33	NonToxin	NonToxin	GBEX01000813|Crotalus_adamanteus tyrosine-protein kinase CSK
SB0265VGL_bridger_k30_8259	16.82	42.8	NonToxin	NonToxin	GAAZ01000526|Crotalus_horridus Cleavage and polyadenylation specificity factor
SB0265VGL_bridger_k30_8286	9.13	26.55	NonToxin	NonToxin	GDAY02001268|Agkistrodon_contortrix_contortrix Leucine-rich repeat-containing protein 1-like
SB0265VGL_bridger_k30_8297	8.93	26.52	NonToxin	NonToxin	GBEW01000969|Micrurus_fulvius SH3P2-like protein
SB0265VGL_bridger_k30_8317	10.29	40.74	NonToxin	NonToxin	GAAZ01001087|Crotalus_horridus Core histone macro-H2A,2-like protein
SB0265VGL_bridger_k30_8321	4.63	3.11	NonToxin	NonToxin	GBEX01003140|Crotalus_adamanteus serine/threonine-protein phosphatase 2B
SB0265VGL_bridger_k30_8332	11.23	23.07	NonToxin	NonToxin	GAAZ01001126|Crotalus_horridus 3-hydroxyacyl-CoA dehydratase 3-like protein
SB0265VGL_bridger_k30_8343	19.83	45.6	NonToxin	NonToxin	GDAY02000885|Agkistrodon_contortrix_contortrix Ferredoxin 1
SB0265VGL_bridger_k30_8373	14.05	19.48	NonToxin	NonToxin	ENSACAG00000010309|ENSACAP00000010105|SPON2 SPON2 spondin 2 [Source:NCBI gene;Acc:100556664]
SB0265VGL_bridger_k30_8382	20.12	19.64	NonToxin	NonToxin	GDAY02002848|Agkistrodon_contortrix_contortrix e3 ubiquitin-protein ligase TRAF7-like protein
SB0265VGL_bridger_k30_8411	3.7	12.7	NonToxin	Uncharacterized	Uncharacterized
SB0265VGL_bridger_k30_843	585.15	995.75	NonToxin	NonToxin	GBEW01000893|Micrurus_fulvius 40S ribosomal protein S23
SB0265VGL_bridger_k30_8441	5.92	18.63	NonToxin	Uncharacterized	Uncharacterized
SB0265VGL_bridger_k30_8450	14.14	15.17	NonToxin	NonToxin	GBSH01000232|Boiga_irregularis ADP-ribosylation factor-like protein 6
SB0265VGL_bridger_k30_8465	13.14	29.26	NonToxin	NonToxin	ENSNSUP00000028402,1|TUBGCP4 TUBGCP4 tubulin gamma complex associated protein 4 [Source:HGNC Symbol;Acc:HGNC:16691]
SB0265VGL_bridger_k30_8467	10.9	10.56	NonToxin	NonToxin	ENSPVIG00000002496|ENSPVIP00000002955|AK1 AK1 adenylate kinase 1 [Source:NCBI gene;Acc:110078858]
SB0265VGL_bridger_k30_8468	19.61	27.35	NonToxin	NonToxin	ENSNSUP00000003695,1|RBM18 RBM18 RNA binding motif protein 18 [Source:HGNC Symbol;Acc:HGNC:28413]
SB0265VGL_bridger_k30_852	582.71	541.05	NonToxin	Uncharacterized	Uncharacterized
SB0265VGL_bridger_k30_854	682.9	977.9	NonToxin	NonToxin	GAAZ01002805|Crotalus_horridus Ubiquitin-like protein FUBI-like protein
SB0265VGL_bridger_k30_8544	12.11	21.58	NonToxin	NonToxin	ENSNSUP00000027726,1|FUCA1 FUCA1 alpha-L-fucosidase 1 [Source:HGNC Symbol;Acc:HGNC:4006]
SB0265VGL_bridger_k30_8546	6.67	2.9	NonToxin	Uncharacterized	Uncharacterized
SB0265VGL_bridger_k30_8566	18.55	38.48	NonToxin	NonToxin	GAAZ01001609|Crotalus_horridus Sorting nexin-3
SB0265VGL_bridger_k30_8580	12.45	16.99	NonToxin	Uncharacterized	Uncharacterized
SB0265VGL_bridger_k30_8590	16.37	11.48	NonToxin	Uncharacterized	Uncharacterized
SB0265VGL_bridger_k30_8615	7.72	5.97	NonToxin	NonToxin	GDAY02001182|Agkistrodon_contortrix_contortrix interferon regulatory factor 5
SB0265VGL_bridger_k30_8616	10.57	44.6	NonToxin	NonToxin	GAAZ01002415|Crotalus_horridus Squalene synthase-like protein
SB0265VGL_bridger_k30_8639	16.51	26.18	NonToxin	NonToxin	GAAZ01002518|Crotalus_horridus Tetratricopeptide repeat protein 35-like
SB0265VGL_bridger_k30_8679	19.01	29.42	NonToxin	NonToxin	pleiotrophin
SB0265VGL_bridger_k30_8700	14.92	28.74	NonToxin	NonToxin	ENSPVIG00000021713|ENSPVIP00000029961|MTMR1 MTMR1 myotubularin related protein 1 [Source:NCBI gene;Acc:110082978]
SB0265VGL_bridger_k30_8722	12.97	14.6	NonToxin	NonToxin	GBSH01002034|Boiga_irregularis Phosphatidate phosphatase PPAPDC1B
SB0265VGL_bridger_k30_8723	9.35	13.05	NonToxin	NonToxin	GDAY02001199|Agkistrodon_contortrix_contortrix BTB/POZ domain-containing protein KCTD14
SB0265VGL_bridger_k30_8730	9.27	41.11	NonToxin	NonToxin	ENSNSUP00000022388,1|SDR16C5 SDR16C5 short chain dehydrogenase/reductase family 16C member 5 [Source:HGNC Symbol;Acc:HGNC:30311]
SB0265VGL_bridger_k30_8744	4.07	4.74	NonToxin	Uncharacterized	Uncharacterized
SB0265VGL_bridger_k30_8746	10.6	17.79	NonToxin	NonToxin	ENSNSUP00000013774,1
SB0265VGL_bridger_k30_8748	3.95	2.22	NonToxin	NonToxin	GBEX01000810|Crotalus_adamanteus cysteine-rich protein 2
SB0265VGL_bridger_k30_877	126.96	121.1	NonToxin	NonToxin	GBSI01000418|Hypsiglena_sp,_JMG-2014 Calcium/calmodulin-dependent protein kinase type
SB0265VGL_bridger_k30_8780	15.7	15.92	NonToxin	NonToxin	ENSNSUP00000009707,1|FLAD1 FLAD1 flavin adenine dinucleotide synthetase 1 [Source:HGNC Symbol;Acc:HGNC:24671]
SB0265VGL_bridger_k30_8782	11.36	72.82	NonToxin	NonToxin	GAAZ01002691|Crotalus_horridus Transaldolase-like protein
SB0265VGL_bridger_k30_8787	12.06	27.96	NonToxin	NonToxin	GBEX01000779|Crotalus_adamanteus COP9 signalosome complex subunit 1
SB0265VGL_bridger_k30_8791	14.5	13.97	NonToxin	NonToxin	ENSNSUP00000011006,1|CIART CIART circadian associated repressor of transcription [Source:HGNC Symbol;Acc:HGNC:25200]
SB0265VGL_bridger_k30_8803	15.11	51.69	NonToxin	NonToxin	GBSI01001145|Hypsiglena_sp,_JMG-2014 intraflagellar transport protein 20 -like
SB0265VGL_bridger_k30_8810	11.55	19.77	NonToxin	NonToxin	GDAY02001905|Agkistrodon_contortrix_contortrix u4/U6 small nuclear ribonucleoprotein Prp31-like
SB0265VGL_bridger_k30_8832	13.64	26.51	NonToxin	NonToxin	ST3 beta-galactoside alpha-2,3-sialyltransferase 5
SB0265VGL_bridger_k30_8839	6.31	56.22	NonToxin	Uncharacterized	Uncharacterized
SB0265VGL_bridger_k30_8854	14.77	14.77	NonToxin	NonToxin	GAAZ01000829|Crotalus_horridus ER lumen protein retaining receptor 1
SB0265VGL_bridger_k30_8860	8.84	32.6	NonToxin	NonToxin	GAAZ01001518|Crotalus_horridus mitochondrial import inner membrane translocase
SB0265VGL_bridger_k30_8881	16.57	25.96	NonToxin	NonToxin	GBEX01000284|Crotalus_adamanteus aspartyl aminopeptidase
SB0265VGL_bridger_k30_8904	14.62	33.65	NonToxin	NonToxin	GBSH01002043|Boiga_irregularis peptidyl-prolyl cis-trans isomerase-like 3
SB0265VGL_bridger_k30_8909	9.21	26.11	NonToxin	NonToxin	GDAY02002227|Agkistrodon_contortrix_contortrix serine incorporator 3-like protein
SB0265VGL_bridger_k30_8922	18.84	91.11	NonToxin	NonToxin	GAAZ01000874|Crotalus_horridus Protein FAM18B1-like protein
SB0265VGL_bridger_k30_8934	14.23	38.35	NonToxin	NonToxin	ENSPVIG00000008382|ENSPVIP00000010587|GPALPP1 GPALPP1 GPALPP motifs containing 1 [Source:NCBI gene;Acc:110080822]
SB0265VGL_bridger_k30_8940	13.66	95.36	NonToxin	NonToxin	GDAY02001114|Agkistrodon_contortrix_contortrix Intracellular hyaluronan-binding protein 4-like
SB0265VGL_bridger_k30_8943	11.81	41.32	NonToxin	NonToxin	GDAY02000411|Agkistrodon_contortrix_contortrix cathepsin L1-like protein
SB0265VGL_bridger_k30_8948	12.99	20.65	NonToxin	NonToxin	nucleoredoxin
SB0265VGL_bridger_k30_8963	13	31.89	NonToxin	NonToxin	GAAZ01001744|Crotalus_horridus Peptidase D
SB0265VGL_bridger_k30_897	64.11	265.02	NonToxin	NonToxin	GDAY02001079|Agkistrodon_contortrix_contortrix Class A basic helix-loop-helix protein 15-like
SB0265VGL_bridger_k30_8981	7.46	10.48	NonToxin	NonToxin	BRCA1 associated protein
SB0265VGL_bridger_k30_90	14.04	18.68	NonToxin	NonToxin	GDAY02000324|Agkistrodon_contortrix_contortrix UPF0414 transmembrane C20orf30-like protein
SB0265VGL_bridger_k30_9051	18.67	46.55	NonToxin	NonToxin	GBSH01001314|Boiga_irregularis HRAS-like suppressor 3
SB0265VGL_bridger_k30_9076	12.25	9.12	NonToxin	NonToxin	elongator acetyltransferase complex subunit 6
SB0265VGL_bridger_k30_9094	2.13	2.69	NonToxin	NonToxin	ENSNSUP00000006940,1
SB0265VGL_bridger_k30_9097	6.63	10.73	NonToxin	NonToxin	ENSNSUP00000006940,1
SB0265VGL_bridger_k30_9106	13.66	44.99	NonToxin	Uncharacterized	Uncharacterized
SB0265VGL_bridger_k30_9110	2.1	9.28	NonToxin	Uncharacterized	Uncharacterized
SB0265VGL_bridger_k30_9121	14.5	8.07	NonToxin	NonToxin	ENSACAG00000008008|ENSACAP00000007878|SFXN5 SFXN5 sideroflexin 5 [Source:NCBI gene;Acc:100562055]
SB0265VGL_bridger_k30_9129	5.27	26.12	NonToxin	Uncharacterized	Uncharacterized
SB0265VGL_bridger_k30_9156	11.66	43.97	NonToxin	NonToxin	GAAZ01001304|Crotalus_horridus Putative LOC417941-like protein
SB0265VGL_bridger_k30_918	340.16	2192.82	NonToxin	NonToxin	GBEX01001115|Crotalus_adamanteus endoplasmin
SB0265VGL_bridger_k30_9180	12.17	63.58	NonToxin	NonToxin	GDAY02001106|Agkistrodon_contortrix_contortrix hsp90 co-chaperone Cdc37-like protein
SB0265VGL_bridger_k30_9188	10.26	25.23	NonToxin	NonToxin	GBSH01002215|Boiga_irregularis ribosomal protein S10 isoform 1
SB0265VGL_bridger_k30_9189	13.83	24.78	NonToxin	NonToxin	GAAZ01001920|Crotalus_horridus 26S proteasome non-ATPase regulatory subunit
SB0265VGL_bridger_k30_9193	18.75	14.47	NonToxin	Uncharacterized	Uncharacterized
SB0265VGL_bridger_k30_9201	15.35	46.9	NonToxin	NonToxin	GBEX01001834|Crotalus_adamanteus hypothetical protein LOC100553792
SB0265VGL_bridger_k30_921	597.82	449.1	NonToxin	NonToxin	GDAY02000888|Agkistrodon_contortrix_contortrix Ferritin light chain, oocyte isoform
SB0265VGL_bridger_k30_9219	15.58	35.65	NonToxin	NonToxin	GBEW01000816|Micrurus_fulvius u2 small nuclear ribonucleoprotein A'-like
SB0265VGL_bridger_k30_9232	11.94	57.59	NonToxin	NonToxin	ENSNSUP00000007583,1|TBL2 TBL2 transducin beta like 2 [Source:HGNC Symbol;Acc:HGNC:11586]
SB0265VGL_bridger_k30_9252	11.13	23.44	NonToxin	NonToxin	GDAY02001373|Agkistrodon_contortrix_contortrix mitochondrial dicarboxylate carrier-like
SB0265VGL_bridger_k30_9261	13.73	11.36	NonToxin	NonToxin	ENSPVIG00000003776|ENSPVIP00000004640|HTRA2 HTRA2 HtrA serine peptidase 2 [Source:NCBI gene;Acc:110079828]
SB0265VGL_bridger_k30_931	55.46	41.51	NonToxin	Uncharacterized	Uncharacterized
SB0265VGL_bridger_k30_9341	11.79	28.91	NonToxin	Uncharacterized	Uncharacterized
SB0265VGL_bridger_k30_9417	6.02	21.72	NonToxin	NonToxin	GDAY02000440|Agkistrodon_contortrix_contortrix CD82 antigen-like protein
SB0265VGL_bridger_k30_9449	8.39	5.5	NonToxin	NonToxin	methylcrotonoyl-CoA carboxylase 1 (alpha)
SB0265VGL_bridger_k30_9450	4.55	23.72	NonToxin	NonToxin	GDAY02002708|Agkistrodon_contortrix_contortrix translin
SB0265VGL_bridger_k30_9455	14.56	13.39	NonToxin	NonToxin	ENSNSUP00000024742,1|NDUFAF4 NDUFAF4 NADH:ubiquinone oxidoreductase complex assembly factor 4 [Source:HGNC Symbol;Acc:HGNC:21034]
SB0265VGL_bridger_k30_9497	6.41	19.85	NonToxin	NonToxin	GAAZ01000153|Crotalus_horridus Anaphase-promoting complex subunit 13
SB0265VGL_bridger_k30_9549	14.26	33.38	NonToxin	NonToxin	GDAY02002184|Agkistrodon_contortrix_contortrix Sterol-4-alpha-carboxylate 3-dehydrogenase,
SB0265VGL_bridger_k30_9574	10.8	8.03	NonToxin	Uncharacterized	Uncharacterized
SB0265VGL_bridger_k30_9622	5.65	14.77	NonToxin	NonToxin	GBSH01000138|Boiga_irregularis 3-ketodihydrosphingosine reductase-like
SB0265VGL_bridger_k30_9654	10.14	48.96	NonToxin	NonToxin	GDAY02000114|Agkistrodon_contortrix_contortrix putative alcohol dehydrogenase 5 (class III)
SB0265VGL_bridger_k30_966	53.86	94.2	NonToxin	NonToxin	ALX homeobox 1
SB0265VGL_bridger_k30_9684	9.11	26.48	NonToxin	NonToxin	GAAZ01000983|Crotalus_horridus Glutamate-rich WD repeat-containing protein
SB0265VGL_bridger_k30_9715	8.35	28.61	NonToxin	NonToxin	GDAY02000555|Agkistrodon_contortrix_contortrix Cryptochrome-1-like protein
SB0265VGL_bridger_k30_9716	7.91	23.2	NonToxin	NonToxin	GDAY02002641|Agkistrodon_contortrix_contortrix Transmembrane protein 115
SB0265VGL_bridger_k30_9759	16.4	29.94	NonToxin	NonToxin	GBEX01002714|Crotalus_adamanteus Ras-related protein Rab-24-like protein
SB0265VGL_bridger_k30_9761	7.52	23.79	NonToxin	NonToxin	GBEW01000201|Micrurus_fulvius Coiled-coil domain-containing protein 134
SB0265VGL_bridger_k30_9772	13.43	31.72	NonToxin	NonToxin	GDAY02002646|Agkistrodon_contortrix_contortrix Transmembrane protein 14C
SB0265VGL_bridger_k30_979	24.64	16.53	NonToxin	NonToxin	prolylcarboxypeptidase (angiotensinase C)
SB0265VGL_bridger_k30_9820	8.03	7.39	NonToxin	NonToxin	GDAY02000255|Agkistrodon_contortrix_contortrix Battenin-like protein
SB0265VGL_bridger_k30_9822	1.92	13.02	NonToxin	NonToxin	ENSACAG00000002288|ENSACAP00000002170|SCOC SCOC short coiled-coil protein [Source:NCBI gene;Acc:100555802]
SB0265VGL_bridger_k30_9824	10.43	10.42	NonToxin	NonToxin	GBSI01000740|Hypsiglena_sp,_JMG-2014 dnaJ -like protein subfamily C member 11
SB0265VGL_bridger_k30_9827	7.34	21.62	NonToxin	NonToxin	GAAZ01002475|Crotalus_horridus Syntaxin-binding protein 2
SB0265VGL_bridger_k30_9841	9.27	40.73	NonToxin	NonToxin	GAAZ01002989|Crotalus_horridus zinc finger protein 622-like protein
SB0265VGL_bridger_k30_986	413.18	522.23	NonToxin	NonToxin	GDAY02001152|Agkistrodon_contortrix_contortrix Integral membrane protein 2A-like protein
SB0265VGL_bridger_k30_9897	8.1	3.03	NonToxin	NonToxin	ENSNSUP00000008660,1|SERPINE1 SERPINE1 serpin family E member 1 [Source:HGNC Symbol;Acc:HGNC:8583]
SB0265VGL_bridger_k30_9898	12.83	19.33	NonToxin	NonToxin	GAAZ01000848|Crotalus_horridus Exosome complex component RRP4-like protein
SB0265VGL_bridger_k30_9901	12.48	17.29	NonToxin	NonToxin	GAAZ01002892|Crotalus_horridus Vacuolar protein-sorting-associated protein
SB0265VGL_bridger_k30_9934	8.7	22.92	NonToxin	NonToxin	ENSNSUP00000016133,1|APOO APOO apolipoprotein O [Source:HGNC Symbol;Acc:HGNC:28727]
SB0265VGL_bridger_k30_9989	12.74	24.98	NonToxin	NonToxin	GBEX01000921|Crotalus_adamanteus d-tyrosyl-tRNA(Tyr) deacylase 1-like protein
SB0265VGL_bridger_k30_999	518.42	835.57	NonToxin	NonToxin	GDAY02000927|Agkistrodon_contortrix_contortrix Glyceraldehyde-3-phosphate dehydrogenase
SB0265VGL_extender_default_17	42135.1	12448.4	NonToxin	NonToxin	O93523|VM3BP_BOTJA Zinc metalloproteinase-disintegrin-like bothropasin OS=Bothrops jararaca OX=8724 PE=1 SV=2
SB0265VGL_extender_default_298	1625.76	1374.01	NonToxin	Uncharacterized	Uncharacterized
SB0265VGL_extender_default_333	225.81	240.91	NonToxin	Uncharacterized	Uncharacterized
SB0265VGL_extender_default_337	2845.11	3563.77	NonToxin	NonToxin	GAAZ01001730|Crotalus_horridus Protein disulfide-isomerase A3
SB0265VGL_extender_default_338	350.5	316.02	NonToxin	NonToxin	GAAZ01001932|Crotalus_horridus Proteasome maturation protein
SB0265VGL_extender_default_34	5590.42	1634.38	NonToxin	NonToxin	GAAZ01002206|Crotalus_horridus 40S ribosomal protein SA
SB0265VGL_extender_default_576	1767.82	1899.29	NonToxin	Uncharacterized	Uncharacterized
SB0265VGL_extender_default_577	54.51	366.87	NonToxin	NonToxin	GAAZ01000404|Crotalus_horridus Calnexin-like protein
SB0265VGL_extender_seed2000_158	990.36	5803.16	NonToxin	Uncharacterized	Uncharacterized
SB0265VGL_extender_seed2000_185	40655.8	5110.96	NonToxin	NonToxin	Q71RR4|SLA_TRIST Snaclec coagulation factor IX/factor X-binding protein subunit A OS=Trimeresurus stejnegeri OX=39682 PE=2 SV=1
SB0265VGL_extender_seed2000_223	850.2	1458.62	NonToxin	NonToxin	GAAZ01002191|Crotalus_horridus 40S ribosomal protein S27
SB0265VGL_extender_seed2000_247	3070.02	2258.41	NonToxin	NonToxin	GAAZ01001859|Crotalus_horridus Peptidyl-prolyl cis-trans isomerase B-like
SB0265VGL_extender_seed2000_291	1851.26	2679.62	NonToxin	NonToxin	GBEW01000863|Micrurus_fulvius 60S ribosomal protein L36a
SB0265VGL_extender_seed2000_308	731.13	1262.25	NonToxin	NonToxin	GDAY02002084|Agkistrodon_contortrix_contortrix 60S ribosomal protein L13
SB0265VGL_extender_seed2000_523	531	1696.87	NonToxin	NonToxin	GBEW01000022|Micrurus_fulvius Actin, alpha skeletal muscle
SB0265VGL_extender_seed2000_58	597.96	3719.25	NonToxin	NonToxin	GAAZ01002189|Crotalus_horridus 40S ribosomal protein S24
SB0265VGL_extender_seed2000_606	804.31	1694.56	NonToxin	NonToxin	GAAZ01002160|Crotalus_horridus 60S ribosomal protein L39
SB0265VGL_extender_seed2000_757	721.33	697.79	NonToxin	NonToxin	GDAY02002183|Agkistrodon_contortrix_contortrix protein S100-A10
SB0265VGL_ngen_k21_1021	30.07	47.76	NonToxin	NonToxin	ENSPVIG00000015437|ENSPVIP00000020229|NUCB1 NUCB1 nucleobindin 1 [Source:NCBI gene;Acc:110078513]
SB0265VGL_ngen_k21_1040	4.87	2.18	NonToxin	Uncharacterized	Uncharacterized
SB0265VGL_ngen_k21_1047	33.31	74.44	NonToxin	NonToxin	GDAY02000488|Agkistrodon_contortrix_contortrix Citrate synthase, mitochondrial
SB0265VGL_ngen_k21_1058	47.37	91.4	NonToxin	NonToxin	ENSNSUP00000021411,1|ISG15 ISG15 ISG15 ubiquitin like modifier [Source:HGNC Symbol;Acc:HGNC:4053]
SB0265VGL_ngen_k21_1073	58.14	47.33	NonToxin	NonToxin	GBSH01002592|Boiga_irregularis sperm-associated antigen 7-like
SB0265VGL_ngen_k21_1079	29.19	79.91	NonToxin	NonToxin	GAAZ01002750|Crotalus_horridus Tuftelin 1
SB0265VGL_ngen_k21_1098	53.07	27.98	NonToxin	NonToxin	GBSH01000836|Boiga_irregularis Death-associated protein kinase 2
SB0265VGL_ngen_k21_1147	43.45	62.46	NonToxin	NonToxin	GBEW01000156|Micrurus_fulvius UPF0468 C16orf80-like protein
SB0265VGL_ngen_k21_1149	44.55	51.48	NonToxin	NonToxin	GDAY02001818|Agkistrodon_contortrix_contortrix polyglutamine-binding protein 1-like protein
SB0265VGL_ngen_k21_1153	17.24	23.16	NonToxin	NonToxin	ENSNSUP00000000164,1|CLEC16A CLEC16A C-type lectin domain containing 16A [Source:HGNC Symbol;Acc:HGNC:29013]
SB0265VGL_ngen_k21_1155	45.83	108.73	NonToxin	NonToxin	GBEW01001054|Micrurus_fulvius THO complex subunit 4
SB0265VGL_ngen_k21_1197	11.09	93.13	NonToxin	Uncharacterized	Uncharacterized
SB0265VGL_ngen_k21_1258	12.88	29.57	NonToxin	Uncharacterized	Uncharacterized
SB0265VGL_ngen_k21_1297	36.3	23.25	NonToxin	NonToxin	GAAZ01000442|Crotalus_horridus Caspase 9, apoptosis-related cysteine peptidase
SB0265VGL_ngen_k21_1346	32.3	28.14	NonToxin	NonToxin	GAAZ01002895|Crotalus_horridus Vacuolar protein sorting-associated protein
SB0265VGL_ngen_k21_1366	26.09	46.51	NonToxin	Uncharacterized	Uncharacterized
SB0265VGL_ngen_k21_1485	48.05	36.61	NonToxin	NonToxin	xyloside xylosyltransferase 1
SB0265VGL_ngen_k21_1505	5.83	15.46	NonToxin	NonToxin	GDAY02000645|Agkistrodon_contortrix_contortrix putative ATP-dependent RNA helicase DDX56
SB0265VGL_ngen_k21_1529	36.82	53.79	NonToxin	NonToxin	GAAZ01002030|Crotalus_horridus Reticulocalbin-2
SB0265VGL_ngen_k21_1564	36.62	20.47	NonToxin	NonToxin	heterochromatin protein 1, binding protein 3
SB0265VGL_ngen_k21_1602	61.14	39.56	NonToxin	NonToxin	GBEX01002069|Crotalus_adamanteus 39S ribosomal protein L32, mitochondrial
SB0265VGL_ngen_k21_1606	27.44	26.23	NonToxin	Uncharacterized	Uncharacterized
SB0265VGL_ngen_k21_1647	27.26	33.23	NonToxin	NonToxin	GDAY02002247|Agkistrodon_contortrix_contortrix Serine/threonine-protein kinase 16-like protein
SB0265VGL_ngen_k21_1762	17.5	36.82	NonToxin	NonToxin	GDAY02000933|Agkistrodon_contortrix_contortrix hypothetical protein
SB0265VGL_ngen_k21_2	6.5	72.26	NonToxin	Uncharacterized	Uncharacterized
SB0265VGL_ngen_k21_2008	17.94	15.87	NonToxin	Uncharacterized	Uncharacterized
SB0265VGL_ngen_k21_2032	13.27	41.02	NonToxin	NonToxin	GBEX01003969|Crotalus_adamanteus v-type proton ATPase subunit G 1-like protein
SB0265VGL_ngen_k21_2109	16.28	44.56	NonToxin	NonToxin	GAAZ01002509|Crotalus_horridus Tetraspanin-15-like protein
SB0265VGL_ngen_k21_2116	13.73	46.27	NonToxin	NonToxin	GBEW01000060|Micrurus_fulvius Akirin-2-like protein
SB0265VGL_ngen_k21_2130	23.58	63.3	NonToxin	Uncharacterized	Uncharacterized
SB0265VGL_ngen_k21_2149	62.13	202.13	NonToxin	NonToxin	beaded filament structural protein 1, filensin
SB0265VGL_ngen_k21_2153	412.95	1076.7	NonToxin	NonToxin	|ENSPVIG00000013239|ENSPVIP00000017173| dipeptidase 2-like [Source:NCBI gene;Acc:110085484]
SB0265VGL_ngen_k21_2191	61.45	266.07	NonToxin	Uncharacterized	Uncharacterized
SB0265VGL_ngen_k21_2207	51.41	21.52	NonToxin	NonToxin	GDAY02002926|Agkistrodon_contortrix_contortrix v-type proton ATPase subunit F-like protein
SB0265VGL_ngen_k21_2256	101.28	51.07	NonToxin	NonToxin	Tetratricopeptide repeat
SB0265VGL_ngen_k21_2258	96.54	166.89	NonToxin	Uncharacterized	Uncharacterized
SB0265VGL_ngen_k21_2275	207.38	209.14	NonToxin	NonToxin	GBEX01003966|Crotalus_adamanteus v-type proton ATPase 16 kDa proteolipid subunit
SB0265VGL_ngen_k21_2289	80.5	127.3	NonToxin	NonToxin	GBSH01003107|Boiga_irregularis Vimentin
SB0265VGL_ngen_k21_2290	123.6	100.88	NonToxin	NonToxin	GDAY02002779|Agkistrodon_contortrix_contortrix tyrosyl-tRNA synthetase, cytoplasmic
SB0265VGL_ngen_k21_2303	41.63	19.17	NonToxin	NonToxin	methyltransferase like 25
SB0265VGL_ngen_k21_2308	28.17	107.81	NonToxin	NonToxin	GAAZ01000950|Crotalus_horridus Ganglioside GM2 activator
SB0265VGL_ngen_k21_2326	14.9	28.66	NonToxin	Uncharacterized	Uncharacterized
SB0265VGL_ngen_k21_2344	51.25	46.44	NonToxin	Uncharacterized	Uncharacterized
SB0265VGL_ngen_k21_2346	20.36	41.35	NonToxin	NonToxin	MANSC domain containing 1
SB0265VGL_ngen_k21_2354	48.81	337.55	NonToxin	NonToxin	beaded filament structural protein 1, filensin
SB0265VGL_ngen_k21_2366	605.31	1144.35	NonToxin	NonToxin	ubiquitin-like 7
SB0265VGL_ngen_k21_2369	51.57	155.5	NonToxin	NonToxin	GDAY02003011|Agkistrodon_contortrix_contortrix Zinc transporter ZIP11
SB0265VGL_ngen_k21_2375	48.03	278.43	NonToxin	Uncharacterized	Uncharacterized
SB0265VGL_ngen_k21_2407	52.64	74.17	NonToxin	NonToxin	GAAZ01002668|Crotalus_horridus Transmembrane 9 superfamily member 2
SB0265VGL_ngen_k21_2423	603.15	618.16	NonToxin	NonToxin	GBSH01002538|Boiga_irregularis signal peptidase complex subunit 2
SB0265VGL_ngen_k21_2427	90.58	143.52	NonToxin	NonToxin	GBEW01001138|Micrurus_fulvius Tubulin beta-5 chain
SB0265VGL_ngen_k21_2429	63.76	67.76	NonToxin	NonToxin	ENSNSUP00000000834,1
SB0265VGL_ngen_k21_2431	22.74	26.46	NonToxin	Uncharacterized	Uncharacterized
SB0265VGL_ngen_k21_2476	663.48	1.99	NonToxin	Uncharacterized	Uncharacterized
SB0265VGL_ngen_k21_2492	107.24	79.35	NonToxin	NonToxin	GAAZ01001640|Crotalus_horridus NSFL1 cofactor p47-like protein
SB0265VGL_ngen_k21_2500	104.91	141.56	NonToxin	Uncharacterized	Uncharacterized
SB0265VGL_ngen_k21_2514	24.66	33.19	NonToxin	NonToxin	GBEX01003836|Crotalus_adamanteus e3 ubiquitin-protein ligase RNF130-like protein
SB0265VGL_ngen_k21_2541	162.43	348.11	NonToxin	NonToxin	GBEW01001065|Micrurus_fulvius Eukaryotic translation initiation factor 1
SB0265VGL_ngen_k21_2552	333.61	345.62	NonToxin	NonToxin	GBSH01001507|Boiga_irregularis LR8
SB0265VGL_ngen_k21_2555	46.44	37.14	NonToxin	NonToxin	GBSH01001507|Boiga_irregularis LR8
SB0265VGL_ngen_k21_2574	175.49	162.51	NonToxin	NonToxin	proteasome (prosome, macropain) subunit, beta type, 2
SB0265VGL_ngen_k21_2605	22.72	49.79	NonToxin	NonToxin	GBEW01000716|Micrurus_fulvius Poly(rC)-binding protein 2-like protein
SB0265VGL_ngen_k21_2716	217.22	765.17	NonToxin	NonToxin	GBEX01002946|Crotalus_adamanteus 60S ribosomal protein L3
SB0265VGL_ngen_k21_2720	712.79	459.7	NonToxin	NonToxin	GDAY02001412|Agkistrodon_contortrix_contortrix Minor histocompatibility antigen H13
SB0265VGL_ngen_k21_2756	156.07	168.98	NonToxin	NonToxin	GAAZ01000758|Crotalus_horridus Elongation factor 1-alpha 2
SB0265VGL_ngen_k21_2757	91.51	59.09	NonToxin	NonToxin	GAAZ01001076|Crotalus_horridus Hexosaminidase D-like protein
SB0265VGL_ngen_k21_2821	162.86	155.89	NonToxin	Uncharacterized	Uncharacterized
SB0265VGL_ngen_k21_2847	276.62	150.55	NonToxin	Uncharacterized	Uncharacterized
SB0265VGL_ngen_k21_2860	303.75	308.87	NonToxin	NonToxin	GDAY02000371|Agkistrodon_contortrix_contortrix Calmodulin
SB0265VGL_ngen_k21_2863	82.62	206.96	NonToxin	Uncharacterized	Uncharacterized
SB0265VGL_ngen_k21_2886	29.27	24.05	NonToxin	NonToxin	GBSH01002831|Boiga_irregularis Transmembrane BAX inhibitor motif-containing
SB0265VGL_ngen_k21_2926	242.76	322.25	NonToxin	NonToxin	GAAZ01002702|Crotalus_horridus Transgelin-2
SB0265VGL_ngen_k21_2948	1029.89	1080.02	NonToxin	NonToxin	GAAZ01002134|Crotalus_horridus 60S ribosomal protein L14
SB0265VGL_ngen_k21_2951	54.49	75.28	NonToxin	Uncharacterized	Uncharacterized
SB0265VGL_ngen_k21_2974	935.13	589.86	NonToxin	NonToxin	GAAZ01001849|Crotalus_horridus Pancreatic progenitor cell differentiation and
SB0265VGL_ngen_k21_2976	166.02	731.96	NonToxin	NonToxin	GDAY02002540|Agkistrodon_contortrix_contortrix Cyclic AMP-dependent transcription factor ATF-4
SB0265VGL_ngen_k21_2977	111.81	66.55	NonToxin	NonToxin	GBEX01003819|Crotalus_adamanteus ubiquitin-associated domain-containing protein
SB0265VGL_ngen_k21_2993	19.19	70.45	NonToxin	Uncharacterized	Uncharacterized
SB0265VGL_ngen_k21_2997	87.28	143.26	NonToxin	NonToxin	GDAY02000235|Agkistrodon_contortrix_contortrix ATP synthase subunit alpha, mitochondrial
SB0265VGL_ngen_k21_3002	279.17	593.09	NonToxin	NonToxin	GBEW01000893|Micrurus_fulvius 40S ribosomal protein S23
SB0265VGL_ngen_k21_3006	128.71	108.55	NonToxin	NonToxin	ankyrin repeat and FYVE domain containing 1
SB0265VGL_ngen_k21_3032	164.54	289.04	NonToxin	NonToxin	GBSH01002790|Boiga_irregularis eukaryotic initiation factor 4A-I
SB0265VGL_ngen_k21_3037	23.67	34.17	NonToxin	NonToxin	GAAZ01002754|Crotalus_horridus Tumor protein D54-like protein
SB0265VGL_ngen_k21_3057	322.55	150.71	NonToxin	NonToxin	ENSPVIG00000018278|ENSPVIP00000024403|QPCTL QPCTL glutaminyl-peptide cyclotransferase like [Source:NCBI gene;Acc:110075786]
SB0265VGL_ngen_k21_3091	65.52	21	NonToxin	NonToxin	GAAZ01002108|Crotalus_horridus DNA-directed RNA polymerase II subunit RPB3-like
SB0265VGL_ngen_k21_3122	44.74	14.68	NonToxin	Uncharacterized	Uncharacterized
SB0265VGL_ngen_k21_3142	84.99	66.44	NonToxin	Uncharacterized	Uncharacterized
SB0265VGL_ngen_k21_3161	267.62	488.14	NonToxin	NonToxin	GBEX01001461|Crotalus_adamanteus Glutathione S-transferase theta-1
SB0265VGL_ngen_k21_3164	12.24	15.25	NonToxin	NonToxin	Nedd4 family interacting protein 2
SB0265VGL_ngen_k21_3167	62.13	39.9	NonToxin	NonToxin	GDAY02000195|Agkistrodon_contortrix_contortrix Arfaptin-2-like protein
SB0265VGL_ngen_k21_3206	10.25	9.06	NonToxin	Uncharacterized	Uncharacterized
SB0265VGL_ngen_k21_3211	123.76	99.18	NonToxin	NonToxin	ubiquitin-conjugating enzyme E2, J2
SB0265VGL_ngen_k21_3225	81.79	55.47	NonToxin	NonToxin	GBEX01003484|Crotalus_adamanteus thimet oligopeptidase
SB0265VGL_ngen_k21_3227	125.24	123.82	NonToxin	NonToxin	GBEX01000748|Crotalus_adamanteus coatomer subunit alpha
SB0265VGL_ngen_k21_3251	551.18	1204.99	NonToxin	NonToxin	ADAM metallopeptidase with thrombospondin type 1 motif, 5
SB0265VGL_ngen_k21_3257	428.11	462.95	NonToxin	NonToxin	ADAM metallopeptidase domain 22
SB0265VGL_ngen_k21_3266	29.23	38.44	NonToxin	Uncharacterized	Uncharacterized
SB0265VGL_ngen_k21_3302	745.53	123.74	NonToxin	NonToxin	GAAZ01000666|Crotalus_horridus Dolichyl-diphosphooligosaccharide--protein
SB0265VGL_ngen_k21_3305	350.84	361.04	NonToxin	NonToxin	GBEX01001027|Crotalus_adamanteus dr1-associated corepressor
SB0265VGL_ngen_k21_3323	109.16	322.3	NonToxin	NonToxin	GAAZ01001572|Crotalus_horridus Sodium/potassium-transporting ATPase subunit
SB0265VGL_ngen_k21_3334	175.37	198.26	NonToxin	Uncharacterized	Uncharacterized
SB0265VGL_ngen_k21_3336	210.66	267.82	NonToxin	NonToxin	GBEX01002243|Crotalus_adamanteus 60S ribosome subunit biogenesis protein NIP7
SB0265VGL_ngen_k21_3347	21.78	43.71	NonToxin	NonToxin	GAAZ01002448|Crotalus_horridus Copper chaperone for superoxide dismutase-like
SB0265VGL_ngen_k21_3358	631.33	1060.44	NonToxin	NonToxin	GDAY02002735|Agkistrodon_contortrix_contortrix Troponin C, skeletal muscle
SB0265VGL_ngen_k21_3362	127.12	218.89	NonToxin	NonToxin	GDAY02000517|Agkistrodon_contortrix_contortrix Coatomer subunit delta
SB0265VGL_ngen_k21_3397	245	499.8	NonToxin	NonToxin	ENSPVIG00000017653|ENSPVIP00000023370|TPM1 TPM1 tropomyosin 1 [Source:NCBI gene;Acc:110074513]
SB0265VGL_ngen_k21_3409	53.44	52.07	NonToxin	NonToxin	GBSH01001985|Boiga_irregularis pituitary homeobox 2-like isoform 2
SB0265VGL_ngen_k21_3441	545.93	579.4	NonToxin	NonToxin	GBEW01001061|Micrurus_fulvius Eukaryotic translation initiation factor 5A-1
SB0265VGL_ngen_k21_3494	39.99	135.35	NonToxin	NonToxin	ENSNSUP00000023012,1
SB0265VGL_ngen_k21_3503	33.35	76.39	NonToxin	NonToxin	GDAY02002226|Agkistrodon_contortrix_contortrix sarcoplasmic/endoplasmic reticulum calcium
SB0265VGL_ngen_k21_3540	76.76	43.66	NonToxin	NonToxin	ENSPVIG00000021387|ENSPVIP00000028935|SMPD1 SMPD1 sphingomyelin phosphodiesterase 1 [Source:NCBI gene;Acc:110078105]
SB0265VGL_ngen_k21_3549	67.08	54.41	NonToxin	NonToxin	GBEX01001148|Crotalus_adamanteus DNA excision repair protein ERCC-1-like protein
SB0265VGL_ngen_k21_3551	157.43	157.38	NonToxin	Uncharacterized	Uncharacterized
SB0265VGL_ngen_k21_3568	299.77	324.78	NonToxin	NonToxin	GDAY02000503|Agkistrodon_contortrix_contortrix Chloride intracellular channel protein 1-like
SB0265VGL_ngen_k21_3569	218.5	178.77	NonToxin	NonToxin	GDAY02001898|Agkistrodon_contortrix_contortrix 26S proteasome non-ATPase regulatory subunit 4
SB0265VGL_ngen_k21_3577	481.1	1392.25	NonToxin	NonToxin	GBEX01002952|Crotalus_adamanteus 60S ribosomal protein L6
SB0265VGL_ngen_k21_3586	31.04	38.92	NonToxin	NonToxin	ENSNSUP00000015581,1|BLVRB BLVRB biliverdin reductase B [Source:HGNC Symbol;Acc:HGNC:1063]
SB0265VGL_ngen_k21_3608	411.77	214.26	NonToxin	NonToxin	GDAY02002618|Agkistrodon_contortrix_contortrix hypothetical protein
SB0265VGL_ngen_k21_3612	316.79	636.41	NonToxin	NonToxin	GBSI01000816|Hypsiglena_sp,_JMG-2014 Transmembrane emp24 domain-containing protein 2
SB0265VGL_ngen_k21_3627	79.94	336.41	NonToxin	NonToxin	DAZ associated protein 1
SB0265VGL_ngen_k21_3652	39.09	49.27	NonToxin	NonToxin	ENSNSUP00000001013,1
SB0265VGL_ngen_k21_3711	635.21	307.95	NonToxin	NonToxin	GDAY02001900|Agkistrodon_contortrix_contortrix Proteasome subunit Y
SB0265VGL_ngen_k21_3803	411.19	383.34	NonToxin	NonToxin	GBEX01000971|Crotalus_adamanteus protein DJ-1-like
SB0265VGL_ngen_k21_3811	15.3	24.87	NonToxin	NonToxin	GBEX01000007|Crotalus_adamanteus 17-beta-hydroxysteroid dehydrogenase type 6
SB0265VGL_ngen_k21_3816	261.07	967.48	NonToxin	NonToxin	GBEW01000024|Micrurus_fulvius Actin, cytoplasmic 2
SB0265VGL_ngen_k21_3818	265.15	534.5	NonToxin	NonToxin	GBEW01000023|Micrurus_fulvius Actin, cytoplasmic 1
SB0265VGL_ngen_k21_3834	87.76	121.95	NonToxin	NonToxin	GAAZ01002743|Crotalus_horridus Tubulin alpha-1C chain-like protein
SB0265VGL_ngen_k21_385	13.23	36.9	NonToxin	Uncharacterized	Uncharacterized
SB0265VGL_ngen_k21_3901	79.43	116.95	NonToxin	NonToxin	proline-rich coiled-coil 1
SB0265VGL_ngen_k21_3905	36.09	46.53	NonToxin	NonToxin	ENSPVIG00000005996|ENSPVIP00000007324|ATL3 ATL3 atlastin GTPase 3 [Source:NCBI gene;Acc:110084981]
SB0265VGL_ngen_k21_4047	13.12	12.26	NonToxin	NonToxin	GDAY02000347|Agkistrodon_contortrix_contortrix chromosome 6 ORF 125
SB0265VGL_ngen_k21_4063	14.29	30.86	NonToxin	NonToxin	GBEX01000324|Crotalus_adamanteus ATP synthase subunit s, mitochondrial-like
SB0265VGL_ngen_k21_4067	256.05	477.68	NonToxin	Uncharacterized	Uncharacterized
SB0265VGL_ngen_k21_4093	15.26	28.96	NonToxin	Uncharacterized	Uncharacterized
SB0265VGL_ngen_k21_4186	16.28	14.17	NonToxin	NonToxin	GAAZ01000326|Crotalus_horridus UPF0472 C16orf72-like protein
SB0265VGL_ngen_k21_4248	18.23	21.34	NonToxin	Uncharacterized	Uncharacterized
SB0265VGL_ngen_k21_4358	21.63	14.53	NonToxin	NonToxin	GBSI01000090|Hypsiglena_sp,_JMG-2014 Mitochondrial 2-oxoglutarate/malate carrier
SB0265VGL_ngen_k21_4404	29.38	32.76	NonToxin	NonToxin	GAAZ01000392|Crotalus_horridus Calcium release-activated calcium channel
SB0265VGL_ngen_k21_4420	13.74	19.27	NonToxin	NonToxin	GAAZ01002126|Crotalus_horridus Ribosome production factor 1-like protein
SB0265VGL_ngen_k21_4424	15.63	49.1	NonToxin	NonToxin	GBSH01001338|Boiga_irregularis hypothetical proten
SB0265VGL_ngen_k21_4477	21.28	58.07	NonToxin	NonToxin	GDAY02002652|Agkistrodon_contortrix_contortrix Transmembrane protein 183
SB0265VGL_ngen_k21_4600	33.74	43.91	NonToxin	Uncharacterized	Uncharacterized
SB0265VGL_ngen_k21_463	59.46	48.88	NonToxin	NonToxin	ENSNSUP00000026253,1|NECAP2 NECAP2 NECAP endocytosis associated 2 [Source:HGNC Symbol;Acc:HGNC:25528]
SB0265VGL_ngen_k21_4635	16.83	30.4	NonToxin	NonToxin	GBEX01003196|Crotalus_adamanteus Active regulator of SIRT1-like protein
SB0265VGL_ngen_k21_4639	18.95	21.28	NonToxin	Uncharacterized	Uncharacterized
SB0265VGL_ngen_k21_467	36.45	33.78	NonToxin	NonToxin	TAF5 RNA polymerase II, TATA box binding protein (TBP)-associated factor, 100kDa
SB0265VGL_ngen_k21_4723	16.23	31.3	NonToxin	NonToxin	TSR1, 20S rRNA accumulation, homolog (S, cerevisiae)
SB0265VGL_ngen_k21_4791	20.56	70.28	NonToxin	NonToxin	GDAY02000466|Agkistrodon_contortrix_contortrix Cell division cycle protein 123
SB0265VGL_ngen_k21_480	41.1	230.18	NonToxin	NonToxin	GDAY02002506|Agkistrodon_contortrix_contortrix T-complex protein 1 subunit delta
SB0265VGL_ngen_k21_4809	17.33	20.43	NonToxin	NonToxin	ENSNSUP00000023850,1|ACTR6 ACTR6 actin related protein 6 [Source:HGNC Symbol;Acc:HGNC:24025]
SB0265VGL_ngen_k21_4824	17.77	8	NonToxin	NonToxin	forty-two-three domain containing 1
SB0265VGL_ngen_k21_4887	15.53	46.86	NonToxin	Uncharacterized	Uncharacterized
SB0265VGL_ngen_k21_4896	19.33	50.97	NonToxin	Uncharacterized	Uncharacterized
SB0265VGL_ngen_k21_501	106.3	110.58	NonToxin	NonToxin	GBEX01003724|Crotalus_adamanteus TSC22 domain family protein 3
SB0265VGL_ngen_k21_5031	22.07	23.21	NonToxin	NonToxin	GAAZ01001090|Crotalus_horridus Histone H3,2
SB0265VGL_ngen_k21_504	27.42	1.6	NonToxin	Uncharacterized	Uncharacterized
SB0265VGL_ngen_k21_506	103.77	217.74	NonToxin	NonToxin	GDAY02001535|Agkistrodon_contortrix_contortrix NADH dehydrogenase (ubiquinone) 1 beta
SB0265VGL_ngen_k21_515	38.48	22.63	NonToxin	NonToxin	immunoglobulin superfamily, member 11
SB0265VGL_ngen_k21_5150	19.26	17.18	NonToxin	NonToxin	GDAY02000642|Agkistrodon_contortrix_contortrix DNA directed RNA polymerase III polypeptide K
SB0265VGL_ngen_k21_517	56.07	211.39	NonToxin	NonToxin	ATP synthase, H+ transporting, mitochondrial Fo complex, subunit s (factor B)
SB0265VGL_ngen_k21_5283	17.92	33.7	NonToxin	NonToxin	GBEX01000389|Crotalus_adamanteus bolA-like protein 3 isoform 1
SB0265VGL_ngen_k21_5284	4.12	2.76	NonToxin	NonToxin	ENSNSUP00000016525,1
SB0265VGL_ngen_k21_5383	22.84	40.4	NonToxin	NonToxin	GAAZ01000267|Crotalus_horridus Transmembrane BAX inhibitor motif-containing
SB0265VGL_ngen_k21_5403	23.82	34.11	NonToxin	NonToxin	GAAZ01001179|Crotalus_horridus Isocitrate dehydrogenase (NADP),
SB0265VGL_ngen_k21_546	17.47	21.31	NonToxin	NonToxin	GBEW01000055|Micrurus_fulvius ADP-ribosylation factor-like protein 8B-like
SB0265VGL_ngen_k21_5491	71.79	33.72	NonToxin	Uncharacterized	Uncharacterized
SB0265VGL_ngen_k21_554	73.11	86.14	NonToxin	NonToxin	GBEX01002246|Crotalus_adamanteus NipSnap 1-like protein
SB0265VGL_ngen_k21_5546	41.99	71.85	NonToxin	NonToxin	GBSH01002312|Boiga_irregularis Activated RNA polymerase II transcriptional
SB0265VGL_ngen_k21_555	62.47	50	NonToxin	NonToxin	GAAZ01002925|Crotalus_horridus V-type proton ATPase subunit d 1
SB0265VGL_ngen_k21_556	31.71	91.39	NonToxin	NonToxin	GDAY02000119|Agkistrodon_contortrix_contortrix Allograft inflammatory factor 1-like protein
SB0265VGL_ngen_k21_5595	11.42	58.74	NonToxin	NonToxin	GBEX01003338|Crotalus_adamanteus Synaptobrevin-like 1
SB0265VGL_ngen_k21_560	41.38	30.8	NonToxin	NonToxin	GBEX01001978|Crotalus_adamanteus Mevalonate kinase
SB0265VGL_ngen_k21_5636	28.34	21.59	NonToxin	NonToxin	collagen triple helix repeat containing 1
SB0265VGL_ngen_k21_564	42.94	128.58	NonToxin	NonToxin	GBEX01003514|Crotalus_adamanteus eukaryotic translation initiation factor 3
SB0265VGL_ngen_k21_5643	45.57	133.85	NonToxin	NonToxin	GAAZ01002086|Crotalus_horridus Putative ribosome biogenesis protein RLP24-like
SB0265VGL_ngen_k21_5662	34.58	28.24	NonToxin	Uncharacterized	Uncharacterized
SB0265VGL_ngen_k21_5671	20	70.08	NonToxin	NonToxin	GBEW01000128|Micrurus_fulvius Spliceosome RNA helicase BAT1-like protein
SB0265VGL_ngen_k21_5674	29.28	72.79	NonToxin	Uncharacterized	Uncharacterized
SB0265VGL_ngen_k21_5682	21.37	33.77	NonToxin	NonToxin	RAB30, member RAS oncogene family
SB0265VGL_ngen_k21_5726	26.07	69.81	NonToxin	NonToxin	ENSNSUP00000024756,1
SB0265VGL_ngen_k21_5758	26.12	73.15	NonToxin	NonToxin	GBEX01000043|Crotalus_adamanteus acetyl-CoA acetyltransferase, cytosolic
SB0265VGL_ngen_k21_5771	18.87	56.09	NonToxin	NonToxin	GDAY02002281|Agkistrodon_contortrix_contortrix Seryl-tRNA synthetase, cytoplasmic-like protein
SB0265VGL_ngen_k21_5818	15.91	7.47	NonToxin	NonToxin	GDAY02000489|Agkistrodon_contortrix_contortrix casein kinase 2 beta polypeptide
SB0265VGL_ngen_k21_5848	65.58	96.67	NonToxin	NonToxin	GBEX01000500|Crotalus_adamanteus putative C6orf57-like protein
SB0265VGL_ngen_k21_585	85.62	225.81	NonToxin	NonToxin	COP9 signalosome subunit 5
SB0265VGL_ngen_k21_5895	16.83	67.5	NonToxin	NonToxin	GDAY02001156|Agkistrodon_contortrix_contortrix Inosine monophosphate dehydrogenase 2
SB0265VGL_ngen_k21_5901	13.34	14.26	NonToxin	Uncharacterized	Uncharacterized
SB0265VGL_ngen_k21_618	33.81	38.52	NonToxin	NonToxin	TAF5 RNA polymerase II, TATA box binding protein (TBP)-associated factor, 100kDa
SB0265VGL_ngen_k21_642	131.87	106.51	NonToxin	NonToxin	GAAZ01000051|Crotalus_horridus Actin-related protein 2/3 complex subunit 5-like
SB0265VGL_ngen_k21_664	103.73	86.76	NonToxin	NonToxin	GDAY02002693|Agkistrodon_contortrix_contortrix Trafficking protein particle complex 4
SB0265VGL_ngen_k21_686	41.27	43.27	NonToxin	NonToxin	GAAZ01002881|Crotalus_horridus Upstream stimulatory factor 1
SB0265VGL_ngen_k21_689	40.62	90.56	NonToxin	NonToxin	|ENSACAG00000006553|ENSACAP00000006578| hexosaminidase subunit alpha [Source:NCBI gene;Acc:100568210]
SB0265VGL_ngen_k21_711	31.88	127.5	NonToxin	NonToxin	GBEX01001457|Crotalus_adamanteus glutathione S-transferase kappa 1
SB0265VGL_ngen_k21_712	27.18	189.44	NonToxin	NonToxin	GAAZ01001180|Crotalus_horridus Isocitrate dehydrogenase (NADP) cytoplasmic-like
SB0265VGL_ngen_k21_763	84.41	243.8	NonToxin	NonToxin	GAAZ01001364|Crotalus_horridus Multiple coagulation factor deficiency protein
SB0265VGL_ngen_k21_781	29.12	16.73	NonToxin	Uncharacterized	Uncharacterized
SB0265VGL_ngen_k21_792	166.72	280.43	NonToxin	NonToxin	GBEX01000174|Crotalus_adamanteus Alpha globin
SB0265VGL_ngen_k21_821	99.57	95.32	NonToxin	NonToxin	GDAY02001736|Agkistrodon_contortrix_contortrix peptidyl-prolyl cis-trans isomerase FKBP14-like
SB0265VGL_ngen_k21_834	53.88	65.34	NonToxin	NonToxin	GDAY02002486|Agkistrodon_contortrix_contortrix syntaxin-5
SB0265VGL_ngen_k21_848	52.06	70.1	NonToxin	NonToxin	GDAY02001232|Agkistrodon_contortrix_contortrix Kynurenine--oxoglutarate transaminase 1-like
SB0265VGL_ngen_k21_849	42.77	86.87	NonToxin	NonToxin	GBEW01000962|Micrurus_fulvius Splicing factor U2AF 65 kDa subunit
SB0265VGL_ngen_k21_874	26.03	97.11	NonToxin	NonToxin	GDAY02001575|Agkistrodon_contortrix_contortrix Neuroplastin
SB0265VGL_ngen_k21_893	104.19	104.29	NonToxin	NonToxin	GBSH01001732|Boiga_irregularis NADH dehydrogenase 1 subunit c2
SB0265VGL_ngen_k21_917	58	277.3	NonToxin	NonToxin	GAAZ01002575|Crotalus_horridus Eukaryotic translation initiation factor 3
SB0265VGL_ngen_k21_932	46.17	207.57	NonToxin	Uncharacterized	Uncharacterized
SB0265VGL_ngen_k21_950	44.29	53.26	NonToxin	NonToxin	ENSNSUP00000020351,1
SB0265VGL_ngen_k21_973	127.26	150.37	NonToxin	NonToxin	GDAY02002029|Agkistrodon_contortrix_contortrix Cytochrome b-c1 complex subunit Rieske,
SB0265VGL_ngen_k21_974	54.34	31.26	NonToxin	NonToxin	GBEX01003264|Crotalus_adamanteus spermidine synthase
SB0265VGL_ngen_k21_979	28.64	16.97	NonToxin	NonToxin	GDAY02001608|Agkistrodon_contortrix_contortrix non-POU domain-containing octamer-binding
SB0265VGL_ngen_k21_990	41.01	64.82	NonToxin	NonToxin	GBEX01002220|Crotalus_adamanteus sorting nexin-17
SB0265VGL_spades_k127_10007	7.13	19.42	NonToxin	Uncharacterized	Uncharacterized
SB0265VGL_spades_k127_10093	1.67	11.6	NonToxin	Uncharacterized	Uncharacterized
SB0265VGL_spades_k127_10137	4.09	9.16	NonToxin	Uncharacterized	Uncharacterized
SB0265VGL_spades_k127_1016	29.16	99.64	NonToxin	Uncharacterized	Uncharacterized
SB0265VGL_spades_k127_1024	14.3	76.62	NonToxin	NonToxin	GBEX01001414|Crotalus_adamanteus Golgin-45-like protein
SB0265VGL_spades_k127_10273	6.23	1.3	NonToxin	Uncharacterized	Uncharacterized
SB0265VGL_spades_k127_10300	17.57	72.84	NonToxin	NonToxin	GBEW01000621|Micrurus_fulvius N-alpha-acetyltransferase 38, NatC auxiliary
SB0265VGL_spades_k127_1040	25.11	126.59	NonToxin	NonToxin	GAAZ01001901|Crotalus_horridus Prostaglandin E synthase 3
SB0265VGL_spades_k127_10437	51.41	56.5	NonToxin	Uncharacterized	Uncharacterized
SB0265VGL_spades_k127_1048	13.84	53.18	NonToxin	NonToxin	GAAZ01002797|Crotalus_horridus Ubiquitin carboxyl-terminal hydrolase 14-like
SB0265VGL_spades_k127_10481	2.67	13.82	NonToxin	Uncharacterized	Uncharacterized
SB0265VGL_spades_k127_1058	7.42	38.6	NonToxin	NonToxin	ENSPVIG00000013601|ENSPVIP00000017718|HSD17B12 HSD17B12 hydroxysteroid 17-beta dehydrogenase 12 [Source:NCBI gene;Acc:110081502]
SB0265VGL_spades_k127_1062	39.69	47.59	NonToxin	NonToxin	GAAZ01001181|Crotalus_horridus IST1
SB0265VGL_spades_k127_10638	4.58	15.34	NonToxin	Uncharacterized	Uncharacterized
SB0265VGL_spades_k127_1067	16	96.49	NonToxin	NonToxin	SRY (sex determining region Y)-box 2
SB0265VGL_spades_k127_10764	179.8	192.05	NonToxin	NonToxin	ENSNSUP00000003129,1
SB0265VGL_spades_k127_10765	40.95	25.11	NonToxin	NonToxin	GDAY02000240|Agkistrodon_contortrix_contortrix ATP synthase lipid-binding protein,
SB0265VGL_spades_k127_1077	22.16	42.04	NonToxin	NonToxin	GDAY02000064|Agkistrodon_contortrix_contortrix Alpha- and gamma-adaptin-binding protein
SB0265VGL_spades_k127_10806	9.57	11.75	NonToxin	NonToxin	GAAZ01000859|Crotalus_horridus Protein FADD
SB0265VGL_spades_k127_1081	18.23	104.51	NonToxin	NonToxin	GAAZ01001350|Crotalus_horridus Mannose-1-phosphate guanyltransferase beta-like
SB0265VGL_spades_k127_11029	42.87	197.62	NonToxin	NonToxin	GBEX01001542|Crotalus_adamanteus Non-histone chromosomal protein HMG-14-like
SB0265VGL_spades_k127_1106	20.77	113.98	NonToxin	NonToxin	GDAY02001610|Agkistrodon_contortrix_contortrix Protein NOXP20-like protein
SB0265VGL_spades_k127_111	149.31	504.37	NonToxin	NonToxin	GBEX01000994|Crotalus_adamanteus DnaJ subfamily C member 3-like protein
SB0265VGL_spades_k127_1114	18.39	6.98	NonToxin	NonToxin	GAAZ01002820|Crotalus_horridus e3 ubiquitin-protein ligase RNF115-like protein
SB0265VGL_spades_k127_1135	16.26	42.56	NonToxin	NonToxin	GDAY02001783|Agkistrodon_contortrix_contortrix PKHD domain-containing transmembrane protein
SB0265VGL_spades_k127_114	16.04	23.73	NonToxin	NonToxin	GAAZ01000181|Crotalus_horridus AP-1 complex-associated regulatory protein-like
SB0265VGL_spades_k127_1145	18.26	71.28	NonToxin	NonToxin	GAAZ01002747|Crotalus_horridus Tubulin beta-4 chain-like protein
SB0265VGL_spades_k127_11520	42.24	203.26	NonToxin	Uncharacterized	Uncharacterized
SB0265VGL_spades_k127_11521	34.82	82.32	NonToxin	NonToxin	GAAZ01001050|Crotalus_horridus H/ACA ribonucleoprotein complex subunit 3-like
SB0265VGL_spades_k127_11537	7	10.44	NonToxin	Uncharacterized	Uncharacterized
SB0265VGL_spades_k127_11552	56.24	44.13	NonToxin	NonToxin	ENSNSUP00000029004,1
SB0265VGL_spades_k127_11557	16.97	9.78	NonToxin	Uncharacterized	Uncharacterized
SB0265VGL_spades_k127_11628	6.31	36.63	NonToxin	Uncharacterized	Uncharacterized
SB0265VGL_spades_k127_1163	22.21	25.88	NonToxin	NonToxin	GAAZ01000034|Crotalus_horridus n-acetyltransferase 15-like protein
SB0265VGL_spades_k127_11693	2.19	9.79	NonToxin	Uncharacterized	Uncharacterized
SB0265VGL_spades_k127_11698	9.92	20.22	NonToxin	Uncharacterized	Uncharacterized
SB0265VGL_spades_k127_117	26.26	48.94	NonToxin	Uncharacterized	Uncharacterized
SB0265VGL_spades_k127_11747	917.86	2488.07	NonToxin	NonToxin	GBEW01000885|Micrurus_fulvius 40S ribosomal protein S15a
SB0265VGL_spades_k127_11748	272.44	619.19	NonToxin	Uncharacterized	Uncharacterized
SB0265VGL_spades_k127_11775	36.2	48.09	NonToxin	NonToxin	ENSNSUP00000022935,1|TOMM6 TOMM6 translocase of outer mitochondrial membrane 6 [Source:HGNC Symbol;Acc:HGNC:34528]
SB0265VGL_spades_k127_11842	19.33	19.47	NonToxin	Uncharacterized	Uncharacterized
SB0265VGL_spades_k127_12058	5.6	9.5	NonToxin	NonToxin	integrin beta 1 binding protein 1
SB0265VGL_spades_k127_1208	27.62	56.51	NonToxin	NonToxin	ENSNSUP00000014765,1|LAP3 LAP3 leucine aminopeptidase 3 [Source:HGNC Symbol;Acc:HGNC:18449]
SB0265VGL_spades_k127_12116	2.17	8.34	NonToxin	Uncharacterized	Uncharacterized
SB0265VGL_spades_k127_12161	5.24	27.13	NonToxin	NonToxin	UTP3, small subunit (SSU) processome component, homolog (S, cerevisiae)
SB0265VGL_spades_k127_12165	8.58	13.02	NonToxin	Uncharacterized	Uncharacterized
SB0265VGL_spades_k127_12166	5.16	9.15	NonToxin	Uncharacterized	Uncharacterized
SB0265VGL_spades_k127_12235	23.99	32.51	NonToxin	NonToxin	GBSH01002311|Boiga_irregularis DNA-directed RNA polymerase II subunit RPB9
SB0265VGL_spades_k127_12239	16.19	10.98	NonToxin	Uncharacterized	Uncharacterized
SB0265VGL_spades_k127_12278	43.23	36.5	NonToxin	Uncharacterized	Uncharacterized
SB0265VGL_spades_k127_12343	23.51	53.5	NonToxin	NonToxin	GDAY02001471|Agkistrodon_contortrix_contortrix 39S ribosomal protein L23, mitochondrial
SB0265VGL_spades_k127_1238	18.04	35.36	NonToxin	NonToxin	GBEW01000583|Micrurus_fulvius mps one binder kinase activator-like 3-like
SB0265VGL_spades_k127_12397	6.55	7.38	NonToxin	Uncharacterized	Uncharacterized
SB0265VGL_spades_k127_1241	24.75	78.1	NonToxin	NonToxin	GBSI01000166|Hypsiglena_sp,_JMG-2014 adenosine kinase isoform 2
SB0265VGL_spades_k127_12498	1416.97	3036.22	NonToxin	NonToxin	GBEW01000851|Micrurus_fulvius 60S ribosomal protein L23
SB0265VGL_spades_k127_12499	75.62	209.23	NonToxin	NonToxin	GDAY02001832|Agkistrodon_contortrix_contortrix Peptidyl-prolyl cis-trans isomerase FKBP2-like
SB0265VGL_spades_k127_12503	7.51	5.65	NonToxin	NonToxin	GBEX01003015|Crotalus_adamanteus Protein S100-A1-like protein
SB0265VGL_spades_k127_1254	21.71	92.82	NonToxin	Uncharacterized	Uncharacterized
SB0265VGL_spades_k127_12574	1153.54	2682.74	NonToxin	NonToxin	ENSACAG00000000197|ENSACAP00000000190|RPLP1 RPLP1 ribosomal protein lateral stalk subunit P1 [Source:NCBI gene;Acc:100555464]
SB0265VGL_spades_k127_12576	181.78	183.94	NonToxin	NonToxin	GAAZ01001423|Crotalus_horridus Microtubule-associated proteins 1A/1B light
SB0265VGL_spades_k127_1259	11.97	17.58	NonToxin	NonToxin	GAAZ01001516|Crotalus_horridus Mitochondrial import receptor subunit TOM40-like
SB0265VGL_spades_k127_12646	39.98	40.38	NonToxin	Uncharacterized	Uncharacterized
SB0265VGL_spades_k127_1267	18.24	41.12	NonToxin	NonToxin	GAAZ01000576|Crotalus_horridus Coronin-1B-like protein
SB0265VGL_spades_k127_12715	4.42	3.68	NonToxin	Uncharacterized	Uncharacterized
SB0265VGL_spades_k127_129	52.74	86.81	NonToxin	NonToxin	GBEX01001150|Crotalus_adamanteus Rndoplasmic reticulum-Golgi intermediate
SB0265VGL_spades_k127_12904	71.79	71.74	NonToxin	NonToxin	ENSNSUP00000004776,1|PAM16 PAM16 presequence translocase associated motor 16 [Source:HGNC Symbol;Acc:HGNC:29679]
SB0265VGL_spades_k127_12931	19.19	30.86	NonToxin	Uncharacterized	Uncharacterized
SB0265VGL_spades_k127_12949	72.68	112.98	NonToxin	NonToxin	GBEW01001177|Micrurus_fulvius E3 ubiquitin-protein ligase RBX1
SB0265VGL_spades_k127_12988	2.71	12.12	NonToxin	Uncharacterized	Uncharacterized
SB0265VGL_spades_k127_13032	13.97	12.7	NonToxin	Uncharacterized	Uncharacterized
SB0265VGL_spades_k127_1319	18.3	42.24	NonToxin	NonToxin	GBEX01001901|Crotalus_adamanteus major facilitator superfamily domain-containing
SB0265VGL_spades_k127_1324	28.36	58.81	NonToxin	NonToxin	GBSH01000334|Boiga_irregularis protein arginine N-methyltransferase 1
SB0265VGL_spades_k127_1326	56.71	40.61	NonToxin	NonToxin	GDAY02002710|Agkistrodon_contortrix_contortrix Translocase of outer mitochondrial membrane
SB0265VGL_spades_k127_1327	179.16	373.42	NonToxin	Uncharacterized	Uncharacterized
SB0265VGL_spades_k127_13302	5.65	22.25	NonToxin	Uncharacterized	Uncharacterized
SB0265VGL_spades_k127_1332	7.93	7.93	NonToxin	NonToxin	ENSPVIG00000019180|ENSPVIP00000025645|CAPZB CAPZB capping actin protein of muscle Z-line subunit beta [Source:NCBI gene;Acc:110073206]
SB0265VGL_spades_k127_13364	149.47	138.77	NonToxin	NonToxin	GAAZ01001429|Crotalus_horridus Mitochondrial inner membrane organizing system
SB0265VGL_spades_k127_1341	22.21	61.67	NonToxin	NonToxin	GBEX01002581|Crotalus_adamanteus peptidyl-prolyl cis-trans isomerase
SB0265VGL_spades_k127_1345	170.65	139.82	NonToxin	NonToxin	GAAZ01001407|Crotalus_horridus Methyltransferase-like protein 9-like protein
SB0265VGL_spades_k127_1346	36.67	129.08	NonToxin	NonToxin	GBEW01000005|Micrurus_fulvius 14-3-3 protein zeta-like protein
SB0265VGL_spades_k127_1352	12.98	64.37	NonToxin	NonToxin	GAAZ01001079|Crotalus_horridus Histidyl-tRNA synthetase, cytoplasmic-like
SB0265VGL_spades_k127_1362	58.12	41.99	NonToxin	NonToxin	GBSI01000261|Hypsiglena_sp,_JMG-2014 arfaptin-2
SB0265VGL_spades_k127_13770	5.83	12.45	NonToxin	NonToxin	|ENSPVIG00000004162|ENSPVIP00000005147| galectin-1-like [Source:NCBI gene;Acc:110070256]
SB0265VGL_spades_k127_138	73.7	34.41	NonToxin	NonToxin	GAAZ01001011|Crotalus_horridus Golgi reassembly-stacking protein 1-like
SB0265VGL_spades_k127_1386	32.22	93.73	NonToxin	NonToxin	ENSNSUP00000028631,1|KARS KARS lysyl-tRNA synthetase [Source:HGNC Symbol;Acc:HGNC:6215]
SB0265VGL_spades_k127_1392	70.58	21.93	NonToxin	NonToxin	guanine nucleotide binding protein-like 3 (nucleolar)
SB0265VGL_spades_k127_1398	17.96	73.05	NonToxin	NonToxin	GAAZ01000408|Crotalus_horridus Calponin-3-like protein
SB0265VGL_spades_k127_13989	5.33	25.29	NonToxin	Uncharacterized	Uncharacterized
SB0265VGL_spades_k127_140	32.22	54.95	NonToxin	NonToxin	thioredoxin 2
SB0265VGL_spades_k127_141	10.43	24.21	NonToxin	NonToxin	GBSI01000242|Hypsiglena_sp,_JMG-2014 AP-1 complex subunit mu-1
SB0265VGL_spades_k127_14137	7.96	2.76	NonToxin	Uncharacterized	Uncharacterized
SB0265VGL_spades_k127_14166	1.16	3.07	NonToxin	Uncharacterized	Uncharacterized
SB0265VGL_spades_k127_14271	29.66	44.64	NonToxin	NonToxin	GBEX01002894|Crotalus_adamanteus DNA-directed RNA polymerases I and III subunit
SB0265VGL_spades_k127_1430	22.68	39.21	NonToxin	NonToxin	GDAY02000645|Agkistrodon_contortrix_contortrix putative ATP-dependent RNA helicase DDX56
SB0265VGL_spades_k127_1436	29.18	35.05	NonToxin	Uncharacterized	Uncharacterized
SB0265VGL_spades_k127_1448	7.82	17.62	NonToxin	NonToxin	GBEX01000381|Crotalus_adamanteus biliverdin reductase A-like
SB0265VGL_spades_k127_1452	16.62	14.25	NonToxin	NonToxin	ENSNSUP00000023829,1|GPC4 GPC4 glypican 4 [Source:HGNC Symbol;Acc:HGNC:4452]
SB0265VGL_spades_k127_1456	16.03	38.65	NonToxin	NonToxin	GAAZ01002915|Crotalus_horridus vesicle-trafficking protein SEC22b-like protein
SB0265VGL_spades_k127_1466	43.22	40.33	NonToxin	Uncharacterized	Uncharacterized
SB0265VGL_spades_k127_14691	13.53	17.23	NonToxin	Uncharacterized	Uncharacterized
SB0265VGL_spades_k127_14736	173.58	217.38	NonToxin	NonToxin	GAAZ01000628|Crotalus_horridus Cytochrome b-c1 complex subunit 8-like protein
SB0265VGL_spades_k127_1483	8.96	43.86	NonToxin	Uncharacterized	Uncharacterized
SB0265VGL_spades_k127_1486	29.23	115.12	NonToxin	NonToxin	GBEW01001115|Micrurus_fulvius Transforming protein RhoA
SB0265VGL_spades_k127_14956	6.86	26.06	NonToxin	Uncharacterized	Uncharacterized
SB0265VGL_spades_k127_15011	43.23	155.14	NonToxin	NonToxin	GAAZ01001319|Crotalus_horridus LYR motif-containing protein 5-like protein
SB0265VGL_spades_k127_15110	3.7	4.23	NonToxin	NonToxin	cyclin Pas1/PHO80 domain containing 1
SB0265VGL_spades_k127_15153	4.4	3.94	NonToxin	Uncharacterized	Uncharacterized
SB0265VGL_spades_k127_1516	99.14	239.76	NonToxin	NonToxin	ADP-ribosylation factor-like 13B
SB0265VGL_spades_k127_152	13.34	20.33	NonToxin	NonToxin	GDAY02002033|Agkistrodon_contortrix_contortrix hypothetical protein
SB0265VGL_spades_k127_1521	27.87	68.16	NonToxin	NonToxin	ENSNSUP00000028801,1|MAGT1 MAGT1 magnesium transporter 1 [Source:HGNC Symbol;Acc:HGNC:28880]
SB0265VGL_spades_k127_1526	13.62	9.68	NonToxin	NonToxin	GDAY02001442|Agkistrodon_contortrix_contortrix Matrix metalloproteinase-23
SB0265VGL_spades_k127_1529	6.79	8.5	NonToxin	NonToxin	ring finger and CHY zinc finger domain containing 1, E3 ubiquitin protein ligase
SB0265VGL_spades_k127_1535	6.04	1.48	NonToxin	NonToxin	motile sperm domain containing 2
SB0265VGL_spades_k127_15364	9.6	17.32	NonToxin	NonToxin	MORN repeat containing 5
SB0265VGL_spades_k127_15390	3.75	37.27	NonToxin	Uncharacterized	Uncharacterized
SB0265VGL_spades_k127_1560	129.24	115.63	NonToxin	NonToxin	GDAY02000247|Agkistrodon_contortrix_contortrix axin interactor, dorsalization-associated
SB0265VGL_spades_k127_1562	21.81	58.09	NonToxin	NonToxin	GBEX01000660|Crotalus_adamanteus CDK5 regulatory subunit-associated protein
SB0265VGL_spades_k127_1563	28.77	171.32	NonToxin	NonToxin	GAAZ01001699|Crotalus_horridus Ornithine aminotransferase, mitochondrial
SB0265VGL_spades_k127_15668	2.42	10.91	NonToxin	Uncharacterized	Uncharacterized
SB0265VGL_spades_k127_15744	8.35	9.62	NonToxin	Uncharacterized	Uncharacterized
SB0265VGL_spades_k127_1577	26.21	41.85	NonToxin	NonToxin	GBEX01003489|Crotalus_adamanteus 3-ketoacyl-CoA thiolase, mitochondrial-like
SB0265VGL_spades_k127_15831	6.42	4.47	NonToxin	Uncharacterized	Uncharacterized
SB0265VGL_spades_k127_1595	8.83	14.59	NonToxin	NonToxin	ENSNSUP00000026246,1|UBIAD1 UBIAD1 UbiA prenyltransferase domain containing 1 [Source:HGNC Symbol;Acc:HGNC:30791]
SB0265VGL_spades_k127_1600	8.43	39.29	NonToxin	Uncharacterized	Uncharacterized
SB0265VGL_spades_k127_1601	27.36	29.27	NonToxin	NonToxin	ENSNSUP00000022165,1|RBM42 RBM42 RNA binding motif protein 42 [Source:HGNC Symbol;Acc:HGNC:28117]
SB0265VGL_spades_k127_16073	25.91	37.43	NonToxin	Uncharacterized	Uncharacterized
SB0265VGL_spades_k127_1617	10.75	8.04	NonToxin	NonToxin	ENSPVIG00000018425|ENSPVIP00000024481|CORO6 CORO6 coronin 6 [Source:NCBI gene;Acc:110084308]
SB0265VGL_spades_k127_1620	14.38	21.2	NonToxin	NonToxin	ENSPVIG00000014611|ENSPVIP00000019122|PUF60 PUF60 poly(U) binding splicing factor 60 [Source:NCBI gene;Acc:110084825]
SB0265VGL_spades_k127_1623	157.28	762.36	NonToxin	NonToxin	eukaryotic translation initiation factor 4H
SB0265VGL_spades_k127_1626	8.63	60.73	NonToxin	NonToxin	GDAY02002231|Agkistrodon_contortrix_contortrix Serpin B6
SB0265VGL_spades_k127_1630	17.27	32.44	NonToxin	NonToxin	ubiquitin-conjugating enzyme E2, J2
SB0265VGL_spades_k127_1635	47.93	81.33	NonToxin	NonToxin	ENSPVIG00000017653|ENSPVIP00000023366|TPM1 TPM1 tropomyosin 1 [Source:NCBI gene;Acc:110074513]
SB0265VGL_spades_k127_1638	19.61	42.66	NonToxin	NonToxin	GBEX01000560|Crotalus_adamanteus Protein canopy 2-like protein
SB0265VGL_spades_k127_16426	4.24	17.31	NonToxin	Uncharacterized	Uncharacterized
SB0265VGL_spades_k127_1643	11.64	43.76	NonToxin	NonToxin	GBEW01000946|Micrurus_fulvius Serine/threonine-protein phosphatase 2A
SB0265VGL_spades_k127_1650	26.03	191.08	NonToxin	Uncharacterized	Uncharacterized
SB0265VGL_spades_k127_16566	42.33	104.76	NonToxin	Uncharacterized	Uncharacterized
SB0265VGL_spades_k127_16605	3.03	8.84	NonToxin	Uncharacterized	Uncharacterized
SB0265VGL_spades_k127_16675	7.31	34.74	NonToxin	Uncharacterized	Uncharacterized
SB0265VGL_spades_k127_1671	25.12	24.51	NonToxin	NonToxin	Leucine-rich repeat
SB0265VGL_spades_k127_1674	92.16	103.79	NonToxin	NonToxin	GDAY02002648|Agkistrodon_contortrix_contortrix Transmembrane protein 165
SB0265VGL_spades_k127_16824	11.54	19.59	NonToxin	Uncharacterized	Uncharacterized
SB0265VGL_spades_k127_1685	14.26	65.06	NonToxin	NonToxin	GAAZ01000076|Crotalus_horridus Multifunctional protein ADE2-like protein
SB0265VGL_spades_k127_169	12.53	11.53	NonToxin	NonToxin	GAAZ01003005|Crotalus_horridus Zinc finger protein GLIS2-like protein
SB0265VGL_spades_k127_1693	150.47	143.82	NonToxin	NonToxin	GAAZ01002742|Crotalus_horridus Tubulin alpha-1B chain
SB0265VGL_spades_k127_1696	20.17	54.8	NonToxin	NonToxin	GAAZ01000084|Crotalus_horridus Adenylate kinase isoenzyme 6-like protein
SB0265VGL_spades_k127_17112	8.02	19.72	NonToxin	NonToxin	GAAZ01001273|Crotalus_horridus Protein lin-52
SB0265VGL_spades_k127_1713	16	16.46	NonToxin	NonToxin	GDAY02000308|Agkistrodon_contortrix_contortrix UPF0420 protein C16orf58-like protein
SB0265VGL_spades_k127_1729	16.86	50.75	NonToxin	NonToxin	GBSH01000168|Boiga_irregularis N-acetyltransferase 13
SB0265VGL_spades_k127_17415	6.53	17.99	NonToxin	Uncharacterized	Uncharacterized
SB0265VGL_spades_k127_17454	7.37	22.09	NonToxin	Uncharacterized	Uncharacterized
SB0265VGL_spades_k127_1749	141.51	75.55	NonToxin	Uncharacterized	Uncharacterized
SB0265VGL_spades_k127_1760	21.87	27.7	NonToxin	NonToxin	GDAY02000710|Agkistrodon_contortrix_contortrix DNA polymerase delta subunit 2-like protein
SB0265VGL_spades_k127_1768	11.36	9.6	NonToxin	Uncharacterized	Uncharacterized
SB0265VGL_spades_k127_1777	9.87	16.74	NonToxin	NonToxin	GDAY02000984|Agkistrodon_contortrix_contortrix Golgin subfamily A member 7-like protein
SB0265VGL_spades_k127_1784	48.98	49.32	NonToxin	NonToxin	GDAY02001281|Agkistrodon_contortrix_contortrix Lipid phosphate phosphohydrolase 2-like protein
SB0265VGL_spades_k127_1785	20.15	15.07	NonToxin	NonToxin	ENSNSUP00000025932,1
SB0265VGL_spades_k127_1809	506.29	187.71	NonToxin	NonToxin	prolylcarboxypeptidase (angiotensinase C)
SB0265VGL_spades_k127_1813	19.19	29.81	NonToxin	NonToxin	ariadne RBR E3 ubiquitin protein ligase 2
SB0265VGL_spades_k127_1814	187.19	369.74	NonToxin	NonToxin	ENSNSUP00000025251,1|TXNDC12 TXNDC12 thioredoxin domain containing 12 [Source:HGNC Symbol;Acc:HGNC:24626]
SB0265VGL_spades_k127_182	38.97	55.19	NonToxin	NonToxin	GDAY02000061|Agkistrodon_contortrix_contortrix hypothetical protein
SB0265VGL_spades_k127_1830	19.21	71.63	NonToxin	NonToxin	GDAY02001257|Agkistrodon_contortrix_contortrix Lathosterol oxidase-like protein
SB0265VGL_spades_k127_1834	33.32	76.96	NonToxin	NonToxin	GAAZ01001266|Crotalus_horridus Leydig cell tumor 10 kDa protein
SB0265VGL_spades_k127_184	11.36	49.04	NonToxin	NonToxin	GAAZ01002587|Crotalus_horridus Eukaryotic translation initiation factor
SB0265VGL_spades_k127_1843	84.3	323.59	NonToxin	NonToxin	DnaJ (Hsp40) homolog, subfamily C, member 12
SB0265VGL_spades_k127_1846	14.19	9.64	NonToxin	NonToxin	ENSPVIG00000013882|ENSPVIP00000018138|PEX7 PEX7 peroxisomal biogenesis factor 7 [Source:NCBI gene;Acc:110071704]
SB0265VGL_spades_k127_1854	11.17	34.14	NonToxin	NonToxin	GAAZ01001792|Crotalus_horridus Phosphoserine aminotransferase
SB0265VGL_spades_k127_1863	37.9	85.75	NonToxin	NonToxin	GAAZ01001566|Crotalus_horridus NADH dehydrogenase (ubiquinone) flavoprotein 1,
SB0265VGL_spades_k127_1864	9.5	20.35	NonToxin	NonToxin	ENSNSUP00000018002,1|NIF3L1 NIF3L1 NGG1 interacting factor 3 like 1 [Source:HGNC Symbol;Acc:HGNC:13390]
SB0265VGL_spades_k127_1865	62.57	34.51	NonToxin	Uncharacterized	Uncharacterized
SB0265VGL_spades_k127_1878	40.49	169.74	NonToxin	NonToxin	GAAZ01001344|Crotalus_horridus Malate dehydrogenase, cytoplasmic-like protein
SB0265VGL_spades_k127_188	64.18	29.74	NonToxin	NonToxin	GBEX01001312|Crotalus_adamanteus Furin
SB0265VGL_spades_k127_19	144.86	329.98	NonToxin	NonToxin	GDAY02001635|Agkistrodon_contortrix_contortrix Nucleobindin-2-like protein
SB0265VGL_spades_k127_1909	15.11	52.14	NonToxin	NonToxin	GAAZ01001938|Crotalus_horridus 26S proteasome non-ATPase regulatory subunit
SB0265VGL_spades_k127_1910	10.63	18.74	NonToxin	NonToxin	GAAZ01001361|Crotalus_horridus Max-like protein X-like protein
SB0265VGL_spades_k127_1915	120.64	84.99	NonToxin	Uncharacterized	Uncharacterized
SB0265VGL_spades_k127_1938	17.51	74.34	NonToxin	NonToxin	GBEX01000517|Crotalus_adamanteus carbonic anhydrase 2-like
SB0265VGL_spades_k127_1942	23.88	60.51	NonToxin	NonToxin	GBSH01002941|Boiga_irregularis Tryptophanyl-tRNA synthetase, cytoplasmic-like
SB0265VGL_spades_k127_1951	14.94	49.05	NonToxin	NonToxin	GAAZ01002056|Crotalus_horridus Ribonuclease H1-like protein
SB0265VGL_spades_k127_1955	56.9	31.72	NonToxin	NonToxin	ADP-ribosylation factor GTPase activating protein 2
SB0265VGL_spades_k127_197	77.4	252.9	NonToxin	Uncharacterized	Uncharacterized
SB0265VGL_spades_k127_1977	19.89	46.04	NonToxin	NonToxin	GDAY02002246|Agkistrodon_contortrix_contortrix serine/threonine-protein kinase VRK1-like
SB0265VGL_spades_k127_1983	5.19	17.13	NonToxin	Uncharacterized	Uncharacterized
SB0265VGL_spades_k127_1990	60.81	162.72	NonToxin	NonToxin	GBEW01000716|Micrurus_fulvius Poly(rC)-binding protein 2-like protein
SB0265VGL_spades_k127_20	26.03	22.99	NonToxin	NonToxin	GBSH01002030|Boiga_irregularis protein phosphatase 1 regulatory subunit 1B
SB0265VGL_spades_k127_2004	10.29	33.81	NonToxin	NonToxin	ENSPVIG00000005290|ENSPVIP00000006386|DTNBP1 DTNBP1 dystrobrevin binding protein 1 [Source:NCBI gene;Acc:110081682]
SB0265VGL_spades_k127_2017	12.18	30.39	NonToxin	NonToxin	GDAY02002630|Agkistrodon_contortrix_contortrix transmembrane protein 144
SB0265VGL_spades_k127_2032	101.46	67.07	NonToxin	NonToxin	GDAY02000288|Agkistrodon_contortrix_contortrix BRISC and BRCA1-A complex member 1-like protein
SB0265VGL_spades_k127_2034	26.06	27.39	NonToxin	NonToxin	ENSPVIG00000020291|ENSPVIP00000027293|NDUFS2 NDUFS2 NADH:ubiquinone oxidoreductase core subunit S2 [Source:NCBI gene;Acc:110081004]
SB0265VGL_spades_k127_2045	37.67	89.4	NonToxin	NonToxin	GDAY02001401|Agkistrodon_contortrix_contortrix fumarate hydratase, mitochondrial-like protein
SB0265VGL_spades_k127_2056	9.13	13.82	NonToxin	Uncharacterized	Uncharacterized
SB0265VGL_spades_k127_206	11.86	26.06	NonToxin	NonToxin	|ENSPVIG00000024475|ENSPVIP00000033490| staufen double-stranded RNA binding protein 1 [Source:NCBI gene;Acc:110071791]
SB0265VGL_spades_k127_2062	10.15	16.61	NonToxin	Uncharacterized	Uncharacterized
SB0265VGL_spades_k127_2093	29.04	71.51	NonToxin	NonToxin	GDAY02001558|Agkistrodon_contortrix_contortrix neutral cholesterol ester hydrolase 1
SB0265VGL_spades_k127_2106	50.9	97.67	NonToxin	NonToxin	ENSACAG00000000783|ENSACAP00000000782|PCBP2 PCBP2 poly(rC) binding protein 2 [Source:NCBI gene;Acc:100558788]
SB0265VGL_spades_k127_2120	27.01	33.7	NonToxin	NonToxin	GAAZ01000658|Crotalus_horridus DCN1-like protein 5-like protein
SB0265VGL_spades_k127_2121	48.73	27.81	NonToxin	NonToxin	GAAZ01001353|Crotalus_horridus dol-P-Man:Man(5)GlcNAc(2)-PP-Dol
SB0265VGL_spades_k127_2128	55.91	147.76	NonToxin	NonToxin	GAAZ01001804|Crotalus_horridus PITH domain-containing protein 1-like protein
SB0265VGL_spades_k127_2131	14.06	35.85	NonToxin	Uncharacterized	Uncharacterized
SB0265VGL_spades_k127_2138	7.8	31.1	NonToxin	NonToxin	GrpE nucleotide exchange factor
SB0265VGL_spades_k127_2154	20.22	30.16	NonToxin	NonToxin	APOBEC1 complementation factor
SB0265VGL_spades_k127_2159	21.36	106.69	NonToxin	NonToxin	ENSPVIG00000022132|ENSPVIP00000030046|PSMC3 PSMC3 proteasome 26S subunit, ATPase 3 [Source:NCBI gene;Acc:110082179]
SB0265VGL_spades_k127_217	31.45	140.17	NonToxin	NonToxin	GBEX01001151|Crotalus_adamanteus Protein ERGIC-53
SB0265VGL_spades_k127_2188	7	10.16	NonToxin	NonToxin	ENSNSUP00000005162,1|CCDC127 CCDC127 coiled-coil domain containing 127 [Source:HGNC Symbol;Acc:HGNC:30520]
SB0265VGL_spades_k127_2205	18.64	47.68	NonToxin	NonToxin	GDAY02001306|Agkistrodon_contortrix_contortrix putative LOC427100-like protein
SB0265VGL_spades_k127_2206	18.24	14.99	NonToxin	NonToxin	pleckstrin homology domain containing, family M (with RUN domain) member 2
SB0265VGL_spades_k127_2208	134.43	105.03	NonToxin	NonToxin	GAAZ01002682|Crotalus_horridus Tumor protein p63-regulated 1-like protein
SB0265VGL_spades_k127_2216	20.27	54.43	NonToxin	NonToxin	GBEW01000795|Micrurus_fulvius Ras-related protein Rap-1A
SB0265VGL_spades_k127_2219	90	81.01	NonToxin	Uncharacterized	Uncharacterized
SB0265VGL_spades_k127_2227	15.62	65.78	NonToxin	NonToxin	GAAZ01000630|Crotalus_horridus cytochrome b5-like protein
SB0265VGL_spades_k127_2241	54.72	22.94	NonToxin	NonToxin	GDAY02000866|Agkistrodon_contortrix_contortrix protein FAM84A-like
SB0265VGL_spades_k127_2246	290.37	430.46	NonToxin	NonToxin	alpha-kinase 2
SB0265VGL_spades_k127_2265	9.66	42.65	NonToxin	NonToxin	GAAZ01000602|Crotalus_horridus Putative low affinity copper uptake protein 2
SB0265VGL_spades_k127_2267	28.22	25.55	NonToxin	NonToxin	GAAZ01001025|Crotalus_horridus G protein pathway suppressor 2
SB0265VGL_spades_k127_2286	153.82	280.28	NonToxin	NonToxin	GBEW01000073|Micrurus_fulvius Voltage-dependent anion-selective channel
SB0265VGL_spades_k127_231	38.57	59.13	NonToxin	NonToxin	GDAY02000008|Agkistrodon_contortrix_contortrix 26S proteasome non-ATPase regulatory subunit 1
SB0265VGL_spades_k127_2311	30.49	47.12	NonToxin	NonToxin	GDAY02000431|Agkistrodon_contortrix_contortrix coiled-coil-helix-coiled-coil-helix domain
SB0265VGL_spades_k127_2316	190.29	191.91	NonToxin	NonToxin	GBEW01000745|Micrurus_fulvius Proteasome subunit alpha type-2
SB0265VGL_spades_k127_2347	7.31	29.73	NonToxin	NonToxin	GBEX01003623|Crotalus_adamanteus Transmembrane protein 66
SB0265VGL_spades_k127_2364	33.87	76.75	NonToxin	Uncharacterized	Uncharacterized
SB0265VGL_spades_k127_2370	26.04	15.49	NonToxin	Uncharacterized	Uncharacterized
SB0265VGL_spades_k127_2402	36.75	43	NonToxin	NonToxin	ENSPVIG00000016124|ENSPVIP00000021204|ALG2 ALG2 ALG2 alpha-1,3/1,6-mannosyltransferase [Source:NCBI gene;Acc:110086078]
SB0265VGL_spades_k127_2405	19.24	64.81	NonToxin	NonToxin	GBEX01002041|Crotalus_adamanteus mortality factor 4 like 1
SB0265VGL_spades_k127_241	49.56	38.33	NonToxin	NonToxin	GBEX01000910|Crotalus_adamanteus DDB1- and CUL4-associated factor 11-like
SB0265VGL_spades_k127_2426	53.19	134.6	NonToxin	NonToxin	beaded filament structural protein 1, filensin
SB0265VGL_spades_k127_2451	33.39	31.96	NonToxin	NonToxin	zinc finger, CCCH-type with G patch domain
SB0265VGL_spades_k127_2458	17.04	65.48	NonToxin	NonToxin	ENSNSUP00000001127,1|TTC4 TTC4 tetratricopeptide repeat domain 4 [Source:HGNC Symbol;Acc:HGNC:12394]
SB0265VGL_spades_k127_2474	46.25	50.26	NonToxin	NonToxin	ENSNSUP00000025587,1|MRPL37 MRPL37 mitochondrial ribosomal protein L37 [Source:HGNC Symbol;Acc:HGNC:14034]
SB0265VGL_spades_k127_2492	18.98	37.95	NonToxin	NonToxin	GBEW01000143|Micrurus_fulvius Lys-63-specific deubiquitinase BRCC36-like
SB0265VGL_spades_k127_2506	25.65	94.25	NonToxin	NonToxin	ENSACAG00000009922|ENSACAP00000009727|MYOZ1 MYOZ1 myozenin 1 [Source:NCBI gene;Acc:100562292]
SB0265VGL_spades_k127_2513	30.22	34.46	NonToxin	Uncharacterized	Uncharacterized
SB0265VGL_spades_k127_2541	7.09	33	NonToxin	NonToxin	GBEX01001853|Crotalus_adamanteus long-chain specific acyl-CoA dehydrogenase,
SB0265VGL_spades_k127_2545	8.67	34.15	NonToxin	NonToxin	GAAZ01002922|Crotalus_horridus Vitamin K epoxide reductase complex, subunit 1
SB0265VGL_spades_k127_2549	63.52	60.61	NonToxin	NonToxin	immunoglobulin superfamily, member 11
SB0265VGL_spades_k127_2587	63.84	95.85	NonToxin	NonToxin	GBSH01000729|Boiga_irregularis CREG1-like protein
SB0265VGL_spades_k127_2589	14.41	12.17	NonToxin	NonToxin	GBEX01001014|Crotalus_adamanteus dolichol phosphate-mannose biosynthesis
SB0265VGL_spades_k127_2593	11.97	10.94	NonToxin	NonToxin	GAAZ01000739|Crotalus_horridus Dual specificity mitogen-activated protein
SB0265VGL_spades_k127_2636	6.09	13.9	NonToxin	Uncharacterized	Uncharacterized
SB0265VGL_spades_k127_2637	32.8	34.11	NonToxin	NonToxin	GAAZ01002753|Crotalus_horridus Tumor protein D54-like protein
SB0265VGL_spades_k127_2644	40.39	94.88	NonToxin	NonToxin	GDAY02002202|Agkistrodon_contortrix_contortrix Vesicle-trafficking protein SEC22b-B
SB0265VGL_spades_k127_2659	21.27	23.46	NonToxin	NonToxin	GAAZ01001895|Crotalus_horridus Porphobilinogen deaminase-like protein
SB0265VGL_spades_k127_2661	8.33	15.08	NonToxin	NonToxin	ENSNSUP00000006437,1|GSTO1 GSTO1 glutathione S-transferase omega 1 [Source:HGNC Symbol;Acc:HGNC:13312]
SB0265VGL_spades_k127_2663	5.71	5.86	NonToxin	Uncharacterized	Uncharacterized
SB0265VGL_spades_k127_2671	28.27	32.48	NonToxin	NonToxin	GBSH01001606|Boiga_irregularis MHC class II antigen
SB0265VGL_spades_k127_2675	20.06	20.74	NonToxin	NonToxin	GDAY02001110|Agkistrodon_contortrix_contortrix peroxisomal membrane anchor protein HsPex14p
SB0265VGL_spades_k127_2678	68.68	60.47	NonToxin	NonToxin	GAAZ01001704|Crotalus_horridus Putative oxidoreductase C663,06c-like protein
SB0265VGL_spades_k127_2693	134.65	287.34	NonToxin	NonToxin	|ENSACAG00000020943|ENSACAP00000017866| high mobility group nucleosomal binding domain 2 [Source:NCBI gene;Acc:100553014]
SB0265VGL_spades_k127_2704	10.4	45.49	NonToxin	NonToxin	ENSNSUP00000023613,1
SB0265VGL_spades_k127_2708	22.04	75.79	NonToxin	NonToxin	GAAZ01002869|Crotalus_horridus UMP-CMP kinase-like protein
SB0265VGL_spades_k127_2716	20.71	24.12	NonToxin	NonToxin	GBEW01001156|Micrurus_fulvius Ubiquitin-conjugating enzyme E2 A
SB0265VGL_spades_k127_2720	9.16	24.97	NonToxin	NonToxin	GDAY02002525|Agkistrodon_contortrix_contortrix Tetraspanin-6
SB0265VGL_spades_k127_2733	70.49	194.52	NonToxin	NonToxin	GBEW01000995|Micrurus_fulvius S-phase kinase-associated protein 1-like
SB0265VGL_spades_k127_2737	30.58	100.87	NonToxin	NonToxin	GAAZ01001096|Crotalus_horridus Non-histone chromosomal protein HMG-14A-like
SB0265VGL_spades_k127_2744	45.21	71.17	NonToxin	NonToxin	GAAZ01001904|Crotalus_horridus 26S protease regulatory subunit 8-like protein
SB0265VGL_spades_k127_2745	10.78	31.06	NonToxin	NonToxin	GAAZ01000571|Crotalus_horridus COP9 signalosome complex subunit 5
SB0265VGL_spades_k127_2753	11.23	7.79	NonToxin	NonToxin	ENSPVIG00000016908|ENSPVIP00000022420|SERPINF1 SERPINF1 serpin family F member 1 [Source:NCBI gene;Acc:110084306]
SB0265VGL_spades_k127_2773	542.03	631.97	NonToxin	NonToxin	GAAZ01002246|Crotalus_horridus Protein transport protein Sec61 subunit
SB0265VGL_spades_k127_279	266.11	222.36	NonToxin	NonToxin	ENSNSUP00000015874,1|SND1 SND1 staphylococcal nuclease and tudor domain containing 1 [Source:HGNC Symbol;Acc:HGNC:30646]
SB0265VGL_spades_k127_2792	10.55	18.59	NonToxin	NonToxin	GAAZ01000040|Crotalus_horridus actin, alpha 2, smooth muscle
SB0265VGL_spades_k127_282	13.17	13.47	NonToxin	NonToxin	GDAY02001795|Agkistrodon_contortrix_contortrix Platelet-activating factor acetylhydrolase
SB0265VGL_spades_k127_2838	109.14	311.78	NonToxin	NonToxin	GDAY02001641|Agkistrodon_contortrix_contortrix nucleophosmin
SB0265VGL_spades_k127_2839	56.18	102.83	NonToxin	NonToxin	GDAY02000495|Agkistrodon_contortrix_contortrix Claudin-4-like protein
SB0265VGL_spades_k127_2844	6.37	22.26	NonToxin	NonToxin	GBEX01001236|Crotalus_adamanteus Protein FAM54B-like protein
SB0265VGL_spades_k127_2849	49.71	46.67	NonToxin	NonToxin	GBEX01002078|Crotalus_adamanteus 39S ribosomal protein L51, mitochondrial
SB0265VGL_spades_k127_2858	2.31	3.91	NonToxin	Uncharacterized	Uncharacterized
SB0265VGL_spades_k127_2861	51.79	106.28	NonToxin	NonToxin	GBEW01000984|Micrurus_fulvius Small ubiquitin-related modifier 1
SB0265VGL_spades_k127_2871	8.26	24.43	NonToxin	NonToxin	GDAY02000248|Agkistrodon_contortrix_contortrix b9 domain-containing protein 1
SB0265VGL_spades_k127_2872	116.59	123.65	NonToxin	NonToxin	GBEX01002775|Crotalus_adamanteus NADH-cytochrome b5 reductase 3-like protein
SB0265VGL_spades_k127_2873	56.4	17.66	NonToxin	NonToxin	ENSPVIG00000020603|ENSPVIP00000027744|LYSMD1 LYSMD1 LysM domain containing 1 [Source:NCBI gene;Acc:110081552]
SB0265VGL_spades_k127_2880	12.11	18.93	NonToxin	NonToxin	GBEX01001056|Crotalus_adamanteus e2F-associated phosphoprotein
SB0265VGL_spades_k127_2916	88.1	248.1	NonToxin	Uncharacterized	Uncharacterized
SB0265VGL_spades_k127_292	93.62	45.57	NonToxin	NonToxin	GAAZ01000059|Crotalus_horridus putative acyl-Coenzyme A binding domain
SB0265VGL_spades_k127_2932	22.41	25.15	NonToxin	NonToxin	GBEX01000155|Crotalus_adamanteus putative alpha-ketoglutarate-dependent
SB0265VGL_spades_k127_2941	18.02	47.86	NonToxin	NonToxin	GAAZ01002310|Crotalus_horridus Serine/threonine-protein phosphatase PP1-alpha
SB0265VGL_spades_k127_2959	37.3	23.42	NonToxin	NonToxin	C-type lectin domain family 3, member A
SB0265VGL_spades_k127_298	4.64	10.52	NonToxin	NonToxin	ENSPVIG00000006112|ENSPVIP00000007486|NDRG2 NDRG2 NDRG family member 2 [Source:NCBI gene;Acc:110086443]
SB0265VGL_spades_k127_3012	13.3	23.2	NonToxin	NonToxin	GAAZ01001294|Crotalus_horridus Hypothetical protein LOC100559892
SB0265VGL_spades_k127_3041	9.36	21.35	NonToxin	NonToxin	GBSH01001620|Boiga_irregularis intermembrane space import and assembly protein
SB0265VGL_spades_k127_3045	46.9	287.69	NonToxin	NonToxin	GBSH01002785|Boiga_irregularis eukaryotic translation initiation factor 3
SB0265VGL_spades_k127_3056	10.3	22.54	NonToxin	NonToxin	GBEX01000124|Crotalus_adamanteus ADP-ribosylation factor-related protein 1-like
SB0265VGL_spades_k127_3058	52.93	143.35	NonToxin	NonToxin	GDAY02001443|Agkistrodon_contortrix_contortrix Malate dehydrogenase, mitochondrial-like
SB0265VGL_spades_k127_3068	15.04	18.06	NonToxin	NonToxin	GAAZ01001894|Crotalus_horridus promethin-like protein
SB0265VGL_spades_k127_3076	28.32	96.9	NonToxin	NonToxin	ENSPVIG00000025133|ENSPVIP00000034398|FAM50B FAM50B family with sequence similarity 50 member A [Source:NCBI gene;Acc:110078600]
SB0265VGL_spades_k127_308	50.99	77.79	NonToxin	NonToxin	ENSPVIG00000005257|ENSPVIP00000012191|PYGB PYGB glycogen phosphorylase B [Source:NCBI gene;Acc:110079549]
SB0265VGL_spades_k127_3098	444.6	2496.43	NonToxin	NonToxin	GDAY02002116|Agkistrodon_contortrix_contortrix 60S ribosomal protein L4
SB0265VGL_spades_k127_3125	64.56	55.06	NonToxin	NonToxin	GBEX01003950|Crotalus_adamanteus Vesicle-associated membrane protein 8
SB0265VGL_spades_k127_3136	510.71	887.59	NonToxin	NonToxin	GAAZ01002703|Crotalus_horridus ADP/ATP translocase 2-like protein
SB0265VGL_spades_k127_3149	31.86	35.86	NonToxin	Uncharacterized	Uncharacterized
SB0265VGL_spades_k127_3184	21.83	41.31	NonToxin	NonToxin	GDAY02000823|Agkistrodon_contortrix_contortrix Etoposide-induced protein 2,4
SB0265VGL_spades_k127_3201	65.1	75.84	NonToxin	NonToxin	GAAZ01000760|Crotalus_horridus Elongation factor 1-delta-like protein
SB0265VGL_spades_k127_3217	41.54	30.6	NonToxin	NonToxin	GAAZ01000643|Crotalus_horridus Choline-phosphate cytidylyltransferase A-like
SB0265VGL_spades_k127_3242	14.18	31.33	NonToxin	NonToxin	GBEW01000219|Micrurus_fulvius Chromobox protein 3-like protein
SB0265VGL_spades_k127_3250	24.01	52.11	NonToxin	NonToxin	GAAZ01001552|Crotalus_horridus NADH dehydrogenase (ubiquinone) 1 alpha
SB0265VGL_spades_k127_3261	40.74	86.27	NonToxin	NonToxin	GBSH01001717|Boiga_irregularis N-acetylglucosamine-1-phosphotransferase subunit
SB0265VGL_spades_k127_327	27.35	44.06	NonToxin	NonToxin	GAAZ01001988|Crotalus_horridus rab GDP dissociation inhibitor alpha-like
SB0265VGL_spades_k127_3277	86.83	258.74	NonToxin	NonToxin	GAAZ01002342|Crotalus_horridus SH3 domain-binding glutamic acid-rich-like
SB0265VGL_spades_k127_3312	22.7	78.24	NonToxin	NonToxin	GAAZ01002806|Crotalus_horridus Ubiquitin fusion degradation protein 1
SB0265VGL_spades_k127_3321	94.44	66.46	NonToxin	NonToxin	GDAY02002421|Agkistrodon_contortrix_contortrix SUMO-activating enzyme subunit 1
SB0265VGL_spades_k127_3328	23.03	14.51	NonToxin	NonToxin	GDAY02002249|Agkistrodon_contortrix_contortrix Serine/threonine-protein kinase 19-like protein
SB0265VGL_spades_k127_3335	10.27	36.06	NonToxin	NonToxin	GBEX01001019|Crotalus_adamanteus Dolichyl-phosphate beta-glucosyltransferase-like
SB0265VGL_spades_k127_3338	13563.5	6.95	NonToxin	Uncharacterized	Uncharacterized
SB0265VGL_spades_k127_3349	17.15	45.45	NonToxin	NonToxin	GDAY02000981|Agkistrodon_contortrix_contortrix Golgi to ER traffic protein 4
SB0265VGL_spades_k127_3366	179.22	124.87	NonToxin	NonToxin	PWWP domain containing 2A
SB0265VGL_spades_k127_3368	28.25	81.81	NonToxin	NonToxin	GAAZ01000603|Crotalus_horridus Protein CWC15
SB0265VGL_spades_k127_3397	123.57	98.02	NonToxin	Uncharacterized	Uncharacterized
SB0265VGL_spades_k127_3405	20.25	55.04	NonToxin	NonToxin	GAAZ01002955|Crotalus_horridus WD repeat-containing protein 61-like protein
SB0265VGL_spades_k127_3413	48.77	39.32	NonToxin	Uncharacterized	Uncharacterized
SB0265VGL_spades_k127_3449	30.46	37.31	NonToxin	Uncharacterized	Uncharacterized
SB0265VGL_spades_k127_345	184.55	138.29	NonToxin	Uncharacterized	Uncharacterized
SB0265VGL_spades_k127_3473	62.92	93.25	NonToxin	NonToxin	GBEW01000331|Micrurus_fulvius Enhancer of rudimentary
SB0265VGL_spades_k127_3474	22.99	49.01	NonToxin	NonToxin	GBEX01003169|Crotalus_adamanteus Vesicle transport protein SFT2A-like protein
SB0265VGL_spades_k127_3487	63.36	202.82	NonToxin	NonToxin	GBEX01001665|Crotalus_adamanteus p variant 2
SB0265VGL_spades_k127_3489	7.8	8.79	NonToxin	NonToxin	GDAY02000381|Agkistrodon_contortrix_contortrix Calumenin-like protein
SB0265VGL_spades_k127_3497	323.77	307.4	NonToxin	NonToxin	GAAZ01000760|Crotalus_horridus Elongation factor 1-delta-like protein
SB0265VGL_spades_k127_35	81.75	131.56	NonToxin	Uncharacterized	Uncharacterized
SB0265VGL_spades_k127_3526	149.36	232.65	NonToxin	NonToxin	ENSNSUP00000026437,1|ATP5F1C ATP5F1C ATP synthase F1 subunit gamma [Source:HGNC Symbol;Acc:HGNC:833]
SB0265VGL_spades_k127_3591	97.17	52.14	NonToxin	NonToxin	GDAY02000924|Agkistrodon_contortrix_contortrix Gamma-secretase subunit APH-1A
SB0265VGL_spades_k127_3618	28	73.92	NonToxin	NonToxin	GAAZ01000801|Crotalus_horridus CCAAT/enhancer-binding protein gamma-like
SB0265VGL_spades_k127_3662	10.39	17.6	NonToxin	NonToxin	GAAZ01001019|Crotalus_horridus GPN-loop GTPase 3-like protein
SB0265VGL_spades_k127_3694	10.88	15.13	NonToxin	NonToxin	ENSNSUP00000002537,1
SB0265VGL_spades_k127_3714	17.41	57.74	NonToxin	NonToxin	GBEW01001005|Micrurus_fulvius SUMO-conjugating enzyme UBC9-B
SB0265VGL_spades_k127_3724	3.08	22.7	NonToxin	Uncharacterized	Uncharacterized
SB0265VGL_spades_k127_3739	20.28	28.22	NonToxin	NonToxin	ENSPVIG00000020753|ENSPVIP00000027942|MTX1 MTX1 metaxin 1 [Source:NCBI gene;Acc:110081068]
SB0265VGL_spades_k127_3749	48.83	110.92	NonToxin	NonToxin	GBEX01000179|Crotalus_adamanteus aminoacyl tRNA synthase complex-interacting
SB0265VGL_spades_k127_3770	55.1	35.57	NonToxin	NonToxin	GBEX01003679|Crotalus_adamanteus transgelin
SB0265VGL_spades_k127_3796	120.11	112.71	NonToxin	NonToxin	GDAY02000365|Agkistrodon_contortrix_contortrix Calcium and integrin-binding protein 1
SB0265VGL_spades_k127_3799	26.48	18.6	NonToxin	NonToxin	GDAY02000007|Agkistrodon_contortrix_contortrix 17-beta-hydroxysteroid dehydrogenase 14-like
SB0265VGL_spades_k127_3810	360.43	395.61	NonToxin	NonToxin	GAAZ01002255|Crotalus_horridus Selenoprotein S-like protein
SB0265VGL_spades_k127_382	34.02	276.45	NonToxin	NonToxin	heat shock protein 90kDa beta (Grp94), member 1
SB0265VGL_spades_k127_3826	12.93	11.15	NonToxin	NonToxin	Ribosome biogenesis protein
SB0265VGL_spades_k127_3828	19.16	35.54	NonToxin	NonToxin	GDAY02001291|Agkistrodon_contortrix_contortrix hypothetical protein
SB0265VGL_spades_k127_3839	25.77	64.72	NonToxin	NonToxin	GAAZ01000294|Crotalus_horridus BRCA2 and CDKN1A-interacting protein-like
SB0265VGL_spades_k127_3856	21.93	79.77	NonToxin	NonToxin	GAAZ01002338|Crotalus_horridus s-formylglutathione hydrolase-like protein
SB0265VGL_spades_k127_3873	38.92	30.1	NonToxin	Uncharacterized	Uncharacterized
SB0265VGL_spades_k127_3896	9.63	26.18	NonToxin	NonToxin	GDAY02002293|Agkistrodon_contortrix_contortrix SH3 domain-binding glutamic acid-rich-like
SB0265VGL_spades_k127_3899	10.63	21	NonToxin	NonToxin	GBEX01000640|Crotalus_adamanteus CD3 gamma/delta
SB0265VGL_spades_k127_3913	49.67	49.32	NonToxin	Uncharacterized	Uncharacterized
SB0265VGL_spades_k127_3914	25.22	83.85	NonToxin	NonToxin	GDAY02002905|Agkistrodon_contortrix_contortrix arginine vasopressin-induced protein 1-like
SB0265VGL_spades_k127_3974	16.57	50.35	NonToxin	NonToxin	GAAZ01001373|Crotalus_horridus 2,4-dienoyl-CoA reductase, mitochondrial-like
SB0265VGL_spades_k127_3975	29.76	204.7	NonToxin	NonToxin	GBEW01000435|Micrurus_fulvius histone H3,3
SB0265VGL_spades_k127_3992	8.86	18.65	NonToxin	NonToxin	GAAZ01000274|Crotalus_horridus BET1-like protein-like protein
SB0265VGL_spades_k127_403	31.27	110.74	NonToxin	NonToxin	GDAY02000825|Agkistrodon_contortrix_contortrix ETS factor-like protein
SB0265VGL_spades_k127_4040	13.99	29.84	NonToxin	NonToxin	GDAY02001020|Agkistrodon_contortrix_contortrix GTP-binding protein
SB0265VGL_spades_k127_4047	27.84	43.88	NonToxin	Uncharacterized	Uncharacterized
SB0265VGL_spades_k127_405	10.33	16.69	NonToxin	Uncharacterized	Uncharacterized
SB0265VGL_spades_k127_4060	192.35	185.6	NonToxin	NonToxin	GAAZ01000333|Crotalus_horridus UPF0556 C19orf10-like protein
SB0265VGL_spades_k127_4069	86.11	212.11	NonToxin	NonToxin	GAAZ01001908|Crotalus_horridus Proteasome subunit alpha type-3-like protein
SB0265VGL_spades_k127_407	38.09	62.11	NonToxin	NonToxin	GDAY02000078|Agkistrodon_contortrix_contortrix Adenylyl cyclase-associated protein 1-like
SB0265VGL_spades_k127_4071	37.2	49.58	NonToxin	NonToxin	GBSH01000327|Boiga_irregularis Apoptosis-related protein 3-like
SB0265VGL_spades_k127_4083	883.42	2142.46	NonToxin	Uncharacterized	Uncharacterized
SB0265VGL_spades_k127_4086	57.12	74.25	NonToxin	NonToxin	GBSH01001507|Boiga_irregularis LR8
SB0265VGL_spades_k127_409	65.03	117.73	NonToxin	NonToxin	GBEX01000119|Crotalus_adamanteus Adipocyte plasma membrane-associated protein
SB0265VGL_spades_k127_4092	156.73	369.06	NonToxin	NonToxin	GBEW01001123|Micrurus_fulvius Translocon-associated protein subunit gamma
SB0265VGL_spades_k127_4093	87.28	137.6	NonToxin	NonToxin	GDAY02000339|Agkistrodon_contortrix_contortrix putative C4orf34-like protein
SB0265VGL_spades_k127_4097	15.86	19.87	NonToxin	NonToxin	transmembrane protein 248
SB0265VGL_spades_k127_4103	23.1	30.75	NonToxin	NonToxin	GBSH01001507|Boiga_irregularis LR8
SB0265VGL_spades_k127_4111	20.63	25.38	NonToxin	Uncharacterized	Uncharacterized
SB0265VGL_spades_k127_412	24.24	27.14	NonToxin	NonToxin	GAAZ01000866|Crotalus_horridus Protein FAM122B-like protein
SB0265VGL_spades_k127_4125	15.35	55.84	NonToxin	NonToxin	GBEX01003825|Crotalus_adamanteus ubiquitin carboxyl-terminal hydrolase isozyme
SB0265VGL_spades_k127_4134	176.54	171.08	NonToxin	NonToxin	GAAZ01001913|Crotalus_horridus Proteasome subunit beta type-1-like protein
SB0265VGL_spades_k127_4141	24.96	22.54	NonToxin	NonToxin	GAAZ01002593|Crotalus_horridus Transcription initiation factor TFIID subunit
SB0265VGL_spades_k127_4153	58.61	123.75	NonToxin	NonToxin	GBEW01000748|Micrurus_fulvius Proteasome subunit alpha type-5 protein
SB0265VGL_spades_k127_4183	81.58	85.47	NonToxin	NonToxin	GBEW01000435|Micrurus_fulvius histone H3,3
SB0265VGL_spades_k127_4185	27.47	108.5	NonToxin	NonToxin	GBEX01003009|Crotalus_adamanteus RWD domain-containing protein 1
SB0265VGL_spades_k127_4199	28.78	51.29	NonToxin	NonToxin	GBSH01001028|Boiga_irregularis F11 receptor
SB0265VGL_spades_k127_4215	32.72	75.1	NonToxin	NonToxin	GAAZ01001345|Crotalus_horridus Male-enhanced antigen 1-like protein
SB0265VGL_spades_k127_4216	18.85	34.01	NonToxin	NonToxin	GAAZ01002648|Crotalus_horridus Transmembrane protein 205
SB0265VGL_spades_k127_4233	371.25	158.54	NonToxin	NonToxin	GAAZ01000185|Crotalus_horridus AP-1 complex subunit sigma-1A
SB0265VGL_spades_k127_4265	25.01	19.39	NonToxin	NonToxin	RAB20, member RAS oncogene family
SB0265VGL_spades_k127_4284	186.67	382.72	NonToxin	NonToxin	Peptidyl-prolyl cis-trans isomerase, FKBP-type
SB0265VGL_spades_k127_4286	21.65	35.42	NonToxin	NonToxin	GDAY02000713|Agkistrodon_contortrix_contortrix Dolichyldiphosphatase 1
SB0265VGL_spades_k127_4295	5.92	11.78	NonToxin	NonToxin	GBEX01003812|Crotalus_adamanteus ubiquitin-like 4A
SB0265VGL_spades_k127_4303	29.99	22.33	NonToxin	NonToxin	GDAY02000528|Agkistrodon_contortrix_contortrix COMM domain-containing protein 3-like protein
SB0265VGL_spades_k127_4319	12.32	25.18	NonToxin	NonToxin	GAAZ01001404|Crotalus_horridus methyltransferase-like protein 5-like protein
SB0265VGL_spades_k127_4336	8.19	36.55	NonToxin	NonToxin	GAAZ01002540|Crotalus_horridus General transcription factor IIF subunit 2-like
SB0265VGL_spades_k127_4342	19.88	65.04	NonToxin	NonToxin	GAAZ01000639|Crotalus_horridus Cytochrome c oxidase subunit 7A-related protein,
SB0265VGL_spades_k127_4350	15.21	95.99	NonToxin	NonToxin	GDAY02001891|Agkistrodon_contortrix_contortrix Proteasome activator complex subunit 2-like
SB0265VGL_spades_k127_438	29.21	44.76	NonToxin	NonToxin	GDAY02002374|Agkistrodon_contortrix_contortrix splicing factor 3b, subunit 2, 145kDa
SB0265VGL_spades_k127_4380	66.88	118.7	NonToxin	NonToxin	NADH dehydrogenase (ubiquinone) 1 alpha subcomplex, 6, 14kDa
SB0265VGL_spades_k127_4406	34.12	16.92	NonToxin	NonToxin	ENSPVIG00000012452|ENSPVIP00000016101|C1QA C1QA complement C1q A chain [Source:NCBI gene;Acc:110089367]
SB0265VGL_spades_k127_4426	250.5	607.19	NonToxin	NonToxin	GAAZ01001754|Crotalus_horridus Peroxiredoxin 4
SB0265VGL_spades_k127_4429	15.7	27.55	NonToxin	NonToxin	GAAZ01000444|Crotalus_horridus Catechol O-methyltransferase domain-containing
SB0265VGL_spades_k127_449	54.35	54.66	NonToxin	NonToxin	GAAZ01003016|Crotalus_horridus Zinc finger protein-like 1
SB0265VGL_spades_k127_4492	395.83	1686.02	NonToxin	NonToxin	GDAY02002119|Agkistrodon_contortrix_contortrix 60S ribosomal protein L7
SB0265VGL_spades_k127_4508	6.85	22.74	NonToxin	Uncharacterized	Uncharacterized
SB0265VGL_spades_k127_452	112.04	322.84	NonToxin	NonToxin	GDAY02003012|Agkistrodon_contortrix_contortrix Zinc transporter ZIP13-like protein
SB0265VGL_spades_k127_453	55.14	213.66	NonToxin	NonToxin	GBEW01001038|Micrurus_fulvius Transcription factor BTF3 4-like protein
SB0265VGL_spades_k127_4551	30.09	27.08	NonToxin	NonToxin	GBEX01002710|Crotalus_adamanteus Ras-related protein Rab-13-like protein
SB0265VGL_spades_k127_4561	118.62	136.64	NonToxin	NonToxin	GDAY02001013|Agkistrodon_contortrix_contortrix Glutathione S-transferase Mu 1-like protein
SB0265VGL_spades_k127_459	108.34	177.58	NonToxin	NonToxin	ENSNSUP00000027182,1|PKM PKM pyruvate kinase M1/2 [Source:HGNC Symbol;Acc:HGNC:9021]
SB0265VGL_spades_k127_4593	18.08	27.9	NonToxin	Uncharacterized	Uncharacterized
SB0265VGL_spades_k127_461	12.47	28.3	NonToxin	NonToxin	ENSPVIG00000001644|ENSPVIP00000001886|ATF6B ATF6B activating transcription factor 6 beta [Source:NCBI gene;Acc:110070069]
SB0265VGL_spades_k127_464	14.16	25.61	NonToxin	NonToxin	ENSNSUP00000016468,1|CYP27A1 CYP27A1 cytochrome P450 family 27 subfamily A member 1 [Source:HGNC Symbol;Acc:HGNC:2605]
SB0265VGL_spades_k127_4642	40.69	17.42	NonToxin	NonToxin	GBSH01001654|Boiga_irregularis mannose-P-dolichol utilization defect 1 protein
SB0265VGL_spades_k127_4648	23.88	54.62	NonToxin	Uncharacterized	Uncharacterized
SB0265VGL_spades_k127_4651	11.69	20.11	NonToxin	NonToxin	GAAZ01000336|Crotalus_horridus Putative C19orf52-like protein
SB0265VGL_spades_k127_4658	19.83	21.85	NonToxin	NonToxin	GBEX01001478|Crotalus_adamanteus guanylate kinase
SB0265VGL_spades_k127_466	30.53	60.87	NonToxin	NonToxin	GAAZ01001977|Crotalus_horridus Ras-related protein Rab-14-like protein
SB0265VGL_spades_k127_4662	2.73	7.84	NonToxin	NonToxin	GDAY02001771|Agkistrodon_contortrix_contortrix phosphatidylinositol transfer protein beta
SB0265VGL_spades_k127_4734	10.2	6.85	NonToxin	NonToxin	GBEX01001386|Crotalus_adamanteus glutathione S-transferase A1-like
SB0265VGL_spades_k127_474	83.55	62.56	NonToxin	NonToxin	eukaryotic translation initiation factor 4H
SB0265VGL_spades_k127_4749	19.51	18.17	NonToxin	NonToxin	GBEX01001705|Crotalus_adamanteus putative KIAA1143-like protein
SB0265VGL_spades_k127_476	71.22	322.88	NonToxin	NonToxin	GDAY02000638|Agkistrodon_contortrix_contortrix Dolichyl-diphosphooligosaccharide--protein
SB0265VGL_spades_k127_4766	8.35	2.4	NonToxin	Uncharacterized	Uncharacterized
SB0265VGL_spades_k127_4767	164.05	175.64	NonToxin	NonToxin	ENSNSUP00000025486,1
SB0265VGL_spades_k127_4775	28.59	37.53	NonToxin	NonToxin	GAAZ01001753|Crotalus_horridus peroxiredoxin-1-like protein
SB0265VGL_spades_k127_4777	28.27	54.99	NonToxin	NonToxin	ENSNSUP00000014268,1|MRPL12 MRPL12 mitochondrial ribosomal protein L12 [Source:HGNC Symbol;Acc:HGNC:10378]
SB0265VGL_spades_k127_4806	25.14	38.43	NonToxin	NonToxin	GBEX01002076|Crotalus_adamanteus 39S ribosomal protein L46, mitochondrial
SB0265VGL_spades_k127_484	77.71	113.8	NonToxin	NonToxin	GBEX01001963|Crotalus_adamanteus Meteorin-like protein-like protein
SB0265VGL_spades_k127_486	58.7	85.67	NonToxin	NonToxin	ENSNSUP00000020296,1|KIAA1191 KIAA1191 KIAA1191 [Source:HGNC Symbol;Acc:HGNC:29209]
SB0265VGL_spades_k127_4862	21.76	115.47	NonToxin	NonToxin	GDAY02001283|Agkistrodon_contortrix_contortrix Protein LLP
SB0265VGL_spades_k127_4881	183.18	236.96	NonToxin	NonToxin	ENSNSUP00000005231,1|REXO2 REXO2 RNA exonuclease 2 [Source:HGNC Symbol;Acc:HGNC:17851]
SB0265VGL_spades_k127_4882	72.15	122.41	NonToxin	NonToxin	GAAZ01001558|Crotalus_horridus NADH dehydrogenase (ubiquinone) 1 beta
SB0265VGL_spades_k127_4896	13.74	53.33	NonToxin	NonToxin	GAAZ01000369|Crotalus_horridus UPF0600 protein C5orf51-like protein
SB0265VGL_spades_k127_4921	53.46	41.83	NonToxin	NonToxin	GDAY02002809|Agkistrodon_contortrix_contortrix NADH dehydrogenase (ubiquinone) iron-sulfur
SB0265VGL_spades_k127_4932	29.14	24.05	NonToxin	NonToxin	GBSH01001233|Boiga_irregularis GTP-binding protein YPT3
SB0265VGL_spades_k127_4934	9.55	6.79	NonToxin	NonToxin	ENSNSUP00000002960,1|RTN2 RTN2 reticulon 2 [Source:HGNC Symbol;Acc:HGNC:10468]
SB0265VGL_spades_k127_4935	7.48	13.72	NonToxin	Uncharacterized	Uncharacterized
SB0265VGL_spades_k127_4951	14.11	24.28	NonToxin	NonToxin	ALG2, alpha-1,3/1,6-mannosyltransferase
SB0265VGL_spades_k127_4972	30.3	95.81	NonToxin	NonToxin	GAAZ01002988|Crotalus_horridus Zinc finger protein 593-like protein
SB0265VGL_spades_k127_4973	12.04	52.4	NonToxin	NonToxin	GBEW01000991|Micrurus_fulvius SOSS complex subunit C-like protein
SB0265VGL_spades_k127_498	11.94	14.4	NonToxin	NonToxin	GAAZ01002346|Crotalus_horridus SHC-transforming protein 1 protein
SB0265VGL_spades_k127_4989	13.2	32.28	NonToxin	NonToxin	GBEX01002455|Crotalus_adamanteus PHD finger-like domain-containing protein
SB0265VGL_spades_k127_499	12.66	15.88	NonToxin	NonToxin	GBEX01000217|Crotalus_adamanteus Ankyrin repeat domain-containing protein
SB0265VGL_spades_k127_4995	11.83	23.65	NonToxin	NonToxin	GDAY02000941|Agkistrodon_contortrix_contortrix GINS complex subunit 3
SB0265VGL_spades_k127_5046	14.88	42.89	NonToxin	NonToxin	GDAY02001833|Agkistrodon_contortrix_contortrix peptidyl-prolyl cis-trans isomerase FKBP3
SB0265VGL_spades_k127_5050	126.56	130.79	NonToxin	Uncharacterized	Uncharacterized
SB0265VGL_spades_k127_507	5.02	8.1	NonToxin	NonToxin	GAAZ01002371|Crotalus_horridus Solute carrier family 25 member 39-like protein
SB0265VGL_spades_k127_509	64.09	43.55	NonToxin	NonToxin	ENSACAG00000013084|ENSACAP00000012853|LMF2 LMF2 lipase maturation factor 2 [Source:NCBI gene;Acc:100560162]
SB0265VGL_spades_k127_5091	71.23	59.21	NonToxin	NonToxin	GBEX01002353|Crotalus_adamanteus ubiquitin thioesterase OTUB1
SB0265VGL_spades_k127_5092	48.36	42.63	NonToxin	NonToxin	GAAZ01000102|Crotalus_horridus ADP-ribosylation factor-like protein 2
SB0265VGL_spades_k127_5142	36.9	242.63	NonToxin	Uncharacterized	Uncharacterized
SB0265VGL_spades_k127_515	32.44	57.89	NonToxin	NonToxin	ENSACAG00000008758|ENSACAP00000008641|IFRD2 IFRD2 interferon related developmental regulator 2 [Source:NCBI gene;Acc:100563204]
SB0265VGL_spades_k127_5163	775.88	1484.89	NonToxin	NonToxin	GBEW01000855|Micrurus_fulvius 60S ribosomal protein L27a
SB0265VGL_spades_k127_5189	6.46	11.42	NonToxin	NonToxin	ENSNSUP00000010418,1|PUDP PUDP pseudouridine 5'-phosphatase [Source:HGNC Symbol;Acc:HGNC:16818]
SB0265VGL_spades_k127_5197	13.15	27.45	NonToxin	NonToxin	surfeit 2
SB0265VGL_spades_k127_5199	8.34	24.64	NonToxin	Uncharacterized	Uncharacterized
SB0265VGL_spades_k127_5203	1719.36	1571.61	NonToxin	NonToxin	GBSH01002387|Boiga_irregularis 40S ribosomal protein S3
SB0265VGL_spades_k127_5225	28.79	53.14	NonToxin	NonToxin	ENSNSUP00000004298,1
SB0265VGL_spades_k127_5226	16.97	54.91	NonToxin	NonToxin	GAAZ01000220|Crotalus_horridus Alpha-aspartyl dipeptidase-like protein
SB0265VGL_spades_k127_5235	21.9	51.82	NonToxin	NonToxin	GAAZ01002627|Crotalus_horridus Transmembrane protein 111
SB0265VGL_spades_k127_525	13.2	28.6	NonToxin	NonToxin	3-ketodihydrosphingosine reductase
SB0265VGL_spades_k127_5254	185.39	140.31	NonToxin	NonToxin	GBSH01001670|Boiga_irregularis 39S ribosomal protein L24
SB0265VGL_spades_k127_5260	6.67	20.55	NonToxin	Uncharacterized	Uncharacterized
SB0265VGL_spades_k127_5309	45.46	70.07	NonToxin	NonToxin	anaphase promoting complex subunit 16
SB0265VGL_spades_k127_5322	96.92	184.7	NonToxin	NonToxin	GDAY02001627|Agkistrodon_contortrix_contortrix Nuclear cap-binding protein subunit 2
SB0265VGL_spades_k127_5337	32.93	84.39	NonToxin	NonToxin	GAAZ01001577|Crotalus_horridus n-alpha-acetyltransferase 10, NatA catalytic
SB0265VGL_spades_k127_5358	164.8	115.88	NonToxin	NonToxin	GAAZ01001234|Crotalus_horridus Ragulator complex protein LAMTOR2
SB0265VGL_spades_k127_5360	18.57	58.24	NonToxin	NonToxin	GBEX01001328|Crotalus_adamanteus Glucosamine 6-phosphate N-acetyltransferase
SB0265VGL_spades_k127_5361	10.61	30.34	NonToxin	NonToxin	GDAY02000346|Agkistrodon_contortrix_contortrix putative C6orf120-like protein
SB0265VGL_spades_k127_5367	16.8	32.89	NonToxin	NonToxin	GBEW01001157|Micrurus_fulvius Ubiquitin-conjugating enzyme E2 B-like protein
SB0265VGL_spades_k127_5382	256.78	567.73	NonToxin	NonToxin	GAAZ01001064|Crotalus_horridus Hemoglobin subunit alpha
SB0265VGL_spades_k127_541	31.61	76.24	NonToxin	NonToxin	GDAY02001300|Agkistrodon_contortrix_contortrix hypothetical protein
SB0265VGL_spades_k127_5422	23.37	69.62	NonToxin	NonToxin	GAAZ01002109|Crotalus_horridus DNA-directed RNA polymerase II subunit RPB4-like
SB0265VGL_spades_k127_544	196.33	105.47	NonToxin	NonToxin	BRCA1 associated protein
SB0265VGL_spades_k127_5452	42.89	32.33	NonToxin	NonToxin	ENSNSUP00000000004,1|UTP11 UTP11 UTP11 small subunit processome component [Source:HGNC Symbol;Acc:HGNC:24329]
SB0265VGL_spades_k127_5478	120.58	29.23	NonToxin	NonToxin	GDAY02002514|Agkistrodon_contortrix_contortrix tescalcin-like protein
SB0265VGL_spades_k127_5496	9.6	34.64	NonToxin	Uncharacterized	Uncharacterized
SB0265VGL_spades_k127_5522	446.34	1072.85	NonToxin	NonToxin	GBEW01000901|Micrurus_fulvius 40S ribosomal protein S5
SB0265VGL_spades_k127_554	10.48	15.17	NonToxin	NonToxin	GAAZ01002658|Crotalus_horridus Transmembrane protein 55B
SB0265VGL_spades_k127_5544	151.29	121.74	NonToxin	NonToxin	ENSNSUP00000018721,1|NDUFB2 NDUFB2 NADH:ubiquinone oxidoreductase subunit B2 [Source:HGNC Symbol;Acc:HGNC:7697]
SB0265VGL_spades_k127_5556	71.38	122.4	NonToxin	NonToxin	NADH dehydrogenase
SB0265VGL_spades_k127_5558	15.99	36.15	NonToxin	NonToxin	GAAZ01002828|Crotalus_horridus Ubiquinone biosynthesis COQ7-like protein
SB0265VGL_spades_k127_5579	17.56	105.23	NonToxin	NonToxin	GBEW01001162|Micrurus_fulvius Ubiquitin-conjugating enzyme E2 L3
SB0265VGL_spades_k127_5590	68.91	117.87	NonToxin	NonToxin	GAAZ01001565|Crotalus_horridus NADH dehydrogenase (ubiquinone) iron-sulfur
SB0265VGL_spades_k127_5602	8.64	28.96	NonToxin	Uncharacterized	Uncharacterized
SB0265VGL_spades_k127_562	28.22	19.5	NonToxin	NonToxin	GDAY02000316|Agkistrodon_contortrix_contortrix putative C19orf47-like protein
SB0265VGL_spades_k127_5633	3.69	12.84	NonToxin	Uncharacterized	Uncharacterized
SB0265VGL_spades_k127_5662	15.26	23.73	NonToxin	NonToxin	GBSH01002812|Boiga_irregularis import inner membrane translocase subunit
SB0265VGL_spades_k127_5701	93.25	315.1	NonToxin	NonToxin	LSM domain
SB0265VGL_spades_k127_5715	11.65	50.7	NonToxin	NonToxin	GDAY02001541|Agkistrodon_contortrix_contortrix NADH dehydrogenase (ubiquinone) flavoprotein 2,
SB0265VGL_spades_k127_5761	24.55	28.62	NonToxin	NonToxin	GBEX01003661|Crotalus_adamanteus trafficking protein particle complex subunit
SB0265VGL_spades_k127_5762	17.54	33.64	NonToxin	NonToxin	GDAY02001093|Agkistrodon_contortrix_contortrix Heat-responsive protein 12
SB0265VGL_spades_k127_5779	12	17.59	NonToxin	NonToxin	GBEX01002515|Crotalus_adamanteus placenta-specific protein 9
SB0265VGL_spades_k127_578	106.78	370.54	NonToxin	Uncharacterized	Uncharacterized
SB0265VGL_spades_k127_5793	623.51	1742.68	NonToxin	NonToxin	GAAZ01002197|Crotalus_horridus 40S ribosomal protein S3a
SB0265VGL_spades_k127_58	16.23	45.33	NonToxin	NonToxin	GAAZ01002665|Crotalus_horridus Transmembrane 9 superfamily member 3
SB0265VGL_spades_k127_5814	5.48	10.24	NonToxin	Uncharacterized	Uncharacterized
SB0265VGL_spades_k127_5923	48.27	107.53	NonToxin	NonToxin	ENSPVIG00000015637|ENSPVIP00000020493|GTF2A2 GTF2A2 general transcription factor IIA subunit 2 [Source:NCBI gene;Acc:110074507]
SB0265VGL_spades_k127_5944	553.54	1321.79	NonToxin	NonToxin	Q8AY75|CALGL_BOTIN Calglandulin OS=Bothrops insularis OX=8723 PE=2 SV=1
SB0265VGL_spades_k127_6005	8.58	26.87	NonToxin	NonToxin	ENSNSUP00000014085,1
SB0265VGL_spades_k127_6010	1083.84	2291.54	NonToxin	Uncharacterized	Uncharacterized
SB0265VGL_spades_k127_602	20.68	14.51	NonToxin	NonToxin	ENSPVIG00000020206|ENSPVIP00000027174|RHOBTB2 RHOBTB2 Rho related BTB domain containing 2 [Source:NCBI gene;Acc:110072185]
SB0265VGL_spades_k127_6056	19.54	6.42	NonToxin	NonToxin	MAX dimerization protein 4
SB0265VGL_spades_k127_6067	103.45	129.79	NonToxin	Uncharacterized	Uncharacterized
SB0265VGL_spades_k127_6068	48.51	81.86	NonToxin	NonToxin	GAAZ01001183|Crotalus_horridus Inosine triphosphate pyrophosphatase-like
SB0265VGL_spades_k127_6094	33.81	132.55	NonToxin	NonToxin	GDAY02002307|Agkistrodon_contortrix_contortrix Signal recognition particle 19 kDa protein-like
SB0265VGL_spades_k127_6096	2.78	7.21	NonToxin	Uncharacterized	Uncharacterized
SB0265VGL_spades_k127_6099	9.03	25.04	NonToxin	NonToxin	GAAZ01002793|Crotalus_horridus Ubiquitin-conjugating enzyme E2 K
SB0265VGL_spades_k127_6123	110.23	177.33	NonToxin	NonToxin	GBEW01000048|Micrurus_fulvius ADP-ribosylation factor 1
SB0265VGL_spades_k127_6151	8.18	34.15	NonToxin	NonToxin	GDAY02002143|Agkistrodon_contortrix_contortrix 28S ribosomal protein S25, mitochondrial
SB0265VGL_spades_k127_6171	15.86	17.02	NonToxin	Uncharacterized	Uncharacterized
SB0265VGL_spades_k127_6188	288.18	112.95	NonToxin	NonToxin	ENSNSUP00000005731,1|EMC10 EMC10 ER membrane protein complex subunit 10 [Source:HGNC Symbol;Acc:HGNC:27609]
SB0265VGL_spades_k127_6196	5.44	14.66	NonToxin	NonToxin	GDAY02001856|Agkistrodon_contortrix_contortrix processing of precursor 5, ribonuclease P/MRP
SB0265VGL_spades_k127_6201	42.09	125.53	NonToxin	NonToxin	GDAY02001476|Agkistrodon_contortrix_contortrix 39S ribosomal protein L42, mitochondrial
SB0265VGL_spades_k127_6217	23.3	40.74	NonToxin	NonToxin	GAAZ01000385|Crotalus_horridus Transmembrane protein C9orf46-like protein
SB0265VGL_spades_k127_6248	127.62	114.45	NonToxin	NonToxin	GAAZ01000262|Crotalus_horridus Barrier-to-autointegration factor-like protein
SB0265VGL_spades_k127_629	21.03	76.24	NonToxin	Uncharacterized	Uncharacterized
SB0265VGL_spades_k127_6378	39.31	62.13	NonToxin	NonToxin	GBEX01002061|Crotalus_adamanteus 39S ribosomal protein L13, mitochondrial
SB0265VGL_spades_k127_6380	44.77	70.51	NonToxin	NonToxin	GBEW01000139|Micrurus_fulvius Biogenesis of lysosome-related organelles
SB0265VGL_spades_k127_6435	13.21	15.05	NonToxin	Uncharacterized	Uncharacterized
SB0265VGL_spades_k127_6450	873.41	1349.9	NonToxin	NonToxin	GAAZ01001850|Crotalus_horridus Peptidyl-prolyl cis-trans isomerase A-like
SB0265VGL_spades_k127_6451	21.02	83.67	NonToxin	NonToxin	GDAY02002596|Agkistrodon_contortrix_contortrix Eukaryotic translation initiation factor 4H-like
SB0265VGL_spades_k127_6470	9.61	17.67	NonToxin	NonToxin	GBSI01000503|Hypsiglena_sp,_JMG-2014 CDC26 subunit of anaphase promoting complex
SB0265VGL_spades_k127_6477	14.81	14.88	NonToxin	NonToxin	GBEX01000203|Crotalus_adamanteus angiogenin-2-like
SB0265VGL_spades_k127_649	26.18	40.93	NonToxin	NonToxin	ENSNSUP00000009681,1|SLC35B1 SLC35B1 solute carrier family 35 member B1 [Source:HGNC Symbol;Acc:HGNC:20798]
SB0265VGL_spades_k127_6504	34.71	36.21	NonToxin	NonToxin	GAAZ01002666|Crotalus_horridus Transmembrane protein 93
SB0265VGL_spades_k127_6505	82.35	103.66	NonToxin	NonToxin	GAAZ01000365|Crotalus_horridus Putative C4orf52-like protein
SB0265VGL_spades_k127_657	2351.16	18851.8	NonToxin	NonToxin	GBEX01002409|Crotalus_adamanteus PDI
SB0265VGL_spades_k127_6571	180.62	809.92	NonToxin	NonToxin	GAAZ01000759|Crotalus_horridus Elongation factor 1-beta-like protein
SB0265VGL_spades_k127_658	176.89	96.4	NonToxin	NonToxin	GAAZ01001054|Crotalus_horridus 3-hydroxybutyrate dehydrogenase
SB0265VGL_spades_k127_659	13.73	23.3	NonToxin	NonToxin	GBSH01002823|Boiga_irregularis TM2 domain-containing protein 2-like
SB0265VGL_spades_k127_6603	14.34	27.35	NonToxin	Uncharacterized	Uncharacterized
SB0265VGL_spades_k127_6606	17.39	64.65	NonToxin	NonToxin	GBEW01000321|Micrurus_fulvius Transcription elongation factor SPT4
SB0265VGL_spades_k127_661	87.28	38.84	NonToxin	NonToxin	CD276 molecule
SB0265VGL_spades_k127_6668	27.89	67.93	NonToxin	NonToxin	GBEX01003046|Crotalus_adamanteus signal peptidase complex catalytic subunit
SB0265VGL_spades_k127_668	122.26	106.21	NonToxin	NonToxin	GDAY02000388|Agkistrodon_contortrix_contortrix cAMP-responsive element-binding protein-like
SB0265VGL_spades_k127_669	13.67	71.86	NonToxin	NonToxin	GBSI01000953|Hypsiglena_sp,_JMG-2014 Glutaryl-CoA dehydrogenase
SB0265VGL_spades_k127_670	32.66	24.5	NonToxin	NonToxin	GAAZ01001182|Crotalus_horridus Protein ITFG3
SB0265VGL_spades_k127_6705	5.11	14.21	NonToxin	NonToxin	tRNA-yW synthesizing protein 3 homolog (S, cerevisiae)
SB0265VGL_spades_k127_671	89.46	295.1	NonToxin	NonToxin	GBEW01000279|Micrurus_fulvius Dolichyl-diphosphooligosaccharide--protein
SB0265VGL_spades_k127_6720	13.05	27.91	NonToxin	NonToxin	mitochondrial ribosomal protein L40
SB0265VGL_spades_k127_6723	10.49	45.96	NonToxin	NonToxin	GDAY02001995|Agkistrodon_contortrix_contortrix retinol-binding protein 5-like protein
SB0265VGL_spades_k127_6747	21.19	12.75	NonToxin	NonToxin	GBSH01002426|Boiga_irregularis SAYSvFN domain-containing protein 1
SB0265VGL_spades_k127_6774	41.99	49.75	NonToxin	Uncharacterized	Uncharacterized
SB0265VGL_spades_k127_679	32.66	40.94	NonToxin	NonToxin	GBSH01001579|Boiga_irregularis metastasis-associated protein MTA2-like
SB0265VGL_spades_k127_681	35.59	69.39	NonToxin	NonToxin	GDAY02002851|Agkistrodon_contortrix_contortrix Ubiquitin-like modifier-activating enzyme 5-like
SB0265VGL_spades_k127_6810	94.95	315.73	NonToxin	NonToxin	GAAZ01002578|Crotalus_horridus Eukaryotic translation initiation factor 3
SB0265VGL_spades_k127_6832	54.66	49.59	NonToxin	Uncharacterized	Uncharacterized
SB0265VGL_spades_k127_6863	430.89	1174.36	NonToxin	NonToxin	GDAY02001560|Agkistrodon_contortrix_contortrix Nucleoside diphosphate kinase
SB0265VGL_spades_k127_6884	394.51	1481.48	NonToxin	NonToxin	GAAZ01002170|Crotalus_horridus 60S ribosomal protein L9
SB0265VGL_spades_k127_698	8.88	7.15	NonToxin	NonToxin	ENSNSUP00000013528,1|CREB3 CREB3 cAMP responsive element binding protein 3 [Source:HGNC Symbol;Acc:HGNC:2347]
SB0265VGL_spades_k127_706	33.67	127.46	NonToxin	NonToxin	GBEW01001148|Micrurus_fulvius Protein tyrosine phosphatase type IVA 1-like
SB0265VGL_spades_k127_7095	27.45	17.4	NonToxin	NonToxin	GBEX01000466|Crotalus_adamanteus Protein C20orf29
SB0265VGL_spades_k127_7097	30.57	4.78	NonToxin	Uncharacterized	Uncharacterized
SB0265VGL_spades_k127_711	57.16	47.52	NonToxin	NonToxin	ENSNSUP00000020287,1|SH3BP5L SH3BP5L SH3 binding domain protein 5 like [Source:HGNC Symbol;Acc:HGNC:29360]
[truncated: 3,470 more rows]

## Sheet: Table_S2VG_Transcriptome_Bfonse
Table_S2. Venom gland transcriptome of Bothrops fonsecai. The expression values represents TPM (transcripts per million reads).
Gene	SB0247CVR	SB0271CVR	Type	Classification	Family
Bfonsecai_3FTx_3FTx-1	53.05	0.82	NonToxin	NonToxin	3FTx
Bfonsecai_5NUC_5NUC-1	766.62	758.34	Toxin	Toxin	5NUC
Bfonsecai_ACHE_ACHE-1	3.99	3.82	NonToxin	NonToxin	ACHE
Bfonsecai_BPP_BPP-1	16419.8	27671.2	Toxin	Toxin	BPP
Bfonsecai_BPP_BPP-2	28.72	41.95	Toxin	Toxin	BPP
Bfonsecai_CRISP_CRISP-1	5149.39	8321.39	Toxin	Toxin	CRISP
Bfonsecai_CTL_CTL-1	39666.7	41865.4	Toxin	Toxin	CTL
Bfonsecai_CTL_CTL-2	34279.7	33770.1	Toxin	Toxin	CTL
Bfonsecai_CTL_CTL-3	7704.82	17006	Toxin	Toxin	CTL
Bfonsecai_CTL_CTL-4	9580.62	15841.3	Toxin	Toxin	CTL
Bfonsecai_CTL_CTL-7	12872.6	8794.57	Toxin	Toxin	CTL
Bfonsecai_CTL_CTL-6	9658.69	8377.8	Toxin	Toxin	CTL
Bfonsecai_CTL_CTL-5	7709.3	8264.84	Toxin	Toxin	CTL
Bfonsecai_CTL_CTL-9	7068.45	7753.87	Toxin	Toxin	CTL
Bfonsecai_CTL_CTL-8	11209.1	7436.18	Toxin	Toxin	CTL
Bfonsecai_CTL_CTL-10	5.34	4946.41	Toxin	Toxin	CTL
Bfonsecai_CTL_CTL-11	5611.61	4914.58	Toxin	Toxin	CTL
Bfonsecai_CTL_CTL-12	2810.09	3700.27	Toxin	Toxin	CTL
Bfonsecai_CTL_CTL-13	1824.08	3155.85	Toxin	Toxin	CTL
Bfonsecai_CVF_CVF-1	0.27	9.43	NonToxin	NonToxin	CVF
Bfonsecai_CYS_CYS-1	28.84	44.1	NonToxin	NonToxin	CYS
Bfonsecai_CYS_CYS-2	19.96	22.92	NonToxin	NonToxin	CYS
Bfonsecai_DIESTER_DIESTER-1	229.08	271.69	NonToxin	NonToxin	DIESTER
Bfonsecai_DIESTER_DIESTER-2	324.88	41.5	NonToxin	NonToxin	DIESTER
Bfonsecai_DIPEP_DIPEP-1	82.42	105.81	NonToxin	NonToxin	DIPEP
Bfonsecai_FAXV_FAXV-1	4.22	2.88	NonToxin	NonToxin	FAXV
Bfonsecai_HYAL_HYAL-1	142.71	142.47	Toxin	Toxin	HYAL
Bfonsecai_IPLA2_IPLA2-1	15.33	44.72	NonToxin	NonToxin	IPLA2
Bfonsecai_KUN_KUN-1	115.75	113.79	NonToxin	NonToxin	KUN
Bfonsecai_LAO_LAO-1	878.75	7813.81	Toxin	Toxin	LAO
Bfonsecai_NGF_NGF-1	27.28	2.25	Toxin	Toxin	NGF
Bfonsecai_PLA2_PLA2-1	136808	113399	Toxin	Toxin	PLA2
Bfonsecai_PLB_PLB-1	2273.98	3450.28	Toxin	Toxin	PLB
Bfonsecai_SVLIPA_SVLIPA-1	43	49	NonToxin	NonToxin	SVLIPA
Bfonsecai_SVMPII_SVMPII-1	59885.6	84332.6	Toxin	Toxin	SVMPII
Bfonsecai_SVMPII_SVMPII-2	7153.27	6532.52	Toxin	Toxin	SVMPII
Bfonsecai_SVMPII_SVMPII-3	9921.96	5812.42	Toxin	Toxin	SVMPII
Bfonsecai_SVMPII_SVMPII-4	1988.46	2961.41	Toxin	Toxin	SVMPII
Bfonsecai_SVMPII_SVMPII-5	1278.46	586.01	Toxin	Toxin	SVMPII
Bfonsecai_SVMPIII_SVMPIII-1	73620.2	79884.3	Toxin	Toxin	SVMPIII
Bfonsecai_SVMPIII_SVMPIII-2	7830.26	7539.65	Toxin	Toxin	SVMPIII
Bfonsecai_SVMPIII_SVMPIII-3	5634.9	4571.62	Toxin	Toxin	SVMPIII
Bfonsecai_SVMPIII_SVMPIII-4	6155.85	2927.75	Toxin	Toxin	SVMPIII
Bfonsecai_SVMPIII_SVMPIII-5	1774.46	2292.37	Toxin	Toxin	SVMPIII
Bfonsecai_SVMPIII_SVMPIII-6	3062.39	2171.65	Toxin	Toxin	SVMPIII
Bfonsecai_SVMPIII_SVMPIII-7	1221.35	2012.05	Toxin	Toxin	SVMPIII
Bfonsecai_SVMPIII_SVMPIII-8	2496.82	1613.88	Toxin	Toxin	SVMPIII
Bfonsecai_SVMPIII_SVMPIII-9	561.84	713.04	Toxin	Toxin	SVMPIII
Bfonsecai_SVMPIII_SVMPIII-10	756.47	635.65	Toxin	Toxin	SVMPIII
Bfonsecai_SVSP_SVSP-1	18437.4	17898.2	Toxin	Toxin	SVSP
Bfonsecai_SVSP_SVSP-2	15830.3	15371.3	Toxin	Toxin	SVSP
Bfonsecai_SVSP_SVSP-3	7899.76	9252.95	Toxin	Toxin	SVSP
Bfonsecai_SVSP_SVSP-4	5035.04	5025.56	Toxin	Toxin	SVSP
Bfonsecai_SVSP_SVSP-5	6843.59	4469.68	Toxin	Toxin	SVSP
Bfonsecai_SVSP_SVSP-6	7678.66	4047.35	Toxin	Toxin	SVSP
Bfonsecai_SVSP_SVSP-7	3934.45	3769.33	Toxin	Toxin	SVSP
Bfonsecai_SVSP_SVSP-8	4459.68	3357.54	Toxin	Toxin	SVSP
Bfonsecai_SVSP_SVSP-9	2510.71	2316.3	Toxin	Toxin	SVSP
Bfonsecai_SVSP_SVSP-10	647.53	1063.37	Toxin	Toxin	SVSP
Bfonsecai_SVSP_SVSP-11	1998.46	1025.41	Toxin	Toxin	SVSP
Bfonsecai_VEGF_VEGF-1	32849.6	43215.6	Toxin	Toxin	VEGF
Bfonsecai_WAP_WAP-1	4.06	12.72	NonToxin	NonToxin	WAP
SB0247CVR_bridger_k30_10018	13.72	14.32	NonToxin	NonToxin	GBEX01001756|Crotalus_adamanteus lanC-like protein 1-like protein
SB0247CVR_bridger_k30_10019	20.47	17.84	NonToxin	NonToxin	GAAZ01002500|Crotalus_horridus Transitional endoplasmic reticulum ATPase-like
SB0247CVR_bridger_k30_10021	16.62	30.91	NonToxin	NonToxin	GAAZ01001203|Crotalus_horridus TLD domain-containing protein KIAA1609
SB0247CVR_bridger_k30_10059	20	16.74	NonToxin	NonToxin	prolyl 3-hydroxylase 2
SB0247CVR_bridger_k30_10103	20.07	17.73	NonToxin	NonToxin	GBSH01002824|Boiga_irregularis transmembrane protein 54
SB0247CVR_bridger_k30_10110	4.3	5.01	NonToxin	Uncharacterized	Uncharacterized
SB0247CVR_bridger_k30_10111	1.21	4.11	NonToxin	Uncharacterized	Uncharacterized
SB0247CVR_bridger_k30_10153	15.92	18.07	NonToxin	NonToxin	GAAZ01000555|Crotalus_horridus 72 kDa type IV collagenase-like protein
SB0247CVR_bridger_k30_10156	8.1	10.1	NonToxin	NonToxin	|ENSACAG00000017439|ENSACAP00000017162| microfibril associated protein 5 [Source:NCBI gene;Acc:100563976]
SB0247CVR_bridger_k30_10161	22.98	22.65	NonToxin	Uncharacterized	Uncharacterized
SB0247CVR_bridger_k30_10171	9.43	19.61	NonToxin	NonToxin	ENSPVIG00000022872|ENSPVIP00000031112|MXRA8 MXRA8 matrix remodeling associated 8 [Source:NCBI gene;Acc:110073292]
SB0247CVR_bridger_k30_10180	22.57	33.61	NonToxin	NonToxin	HEPACAM family member 2
SB0247CVR_bridger_k30_10183	20.33	19.67	NonToxin	NonToxin	GDAY02000941|Agkistrodon_contortrix_contortrix GINS complex subunit 3
SB0247CVR_bridger_k30_10192	8.18	9.46	NonToxin	Uncharacterized	Uncharacterized
SB0247CVR_bridger_k30_10228	8.9	12.41	NonToxin	NonToxin	ENSPVIG00000013234|ENSPVIP00000017161|CMIP CMIP c-Maf inducing protein [Source:NCBI gene;Acc:110085497]
SB0247CVR_bridger_k30_10239	5.58	11.42	NonToxin	NonToxin	zinc finger and BTB domain containing 7C
SB0247CVR_bridger_k30_10245	19.81	11.98	NonToxin	NonToxin	GDAY02001625|Agkistrodon_contortrix_contortrix 5'-nucleotidase domain-containing protein 2-like
SB0247CVR_bridger_k30_10260	12.39	14.26	NonToxin	NonToxin	GBEX01002055|Crotalus_adamanteus mitochondrial import receptor subunit TOM70
SB0247CVR_bridger_k30_10267	15.51	19.19	NonToxin	NonToxin	GAAZ01001185|Crotalus_horridus junction plakoglobin
SB0247CVR_bridger_k30_10300	20.25	18.24	NonToxin	NonToxin	ENSNSUP00000015823,1|COMMD5 COMMD5 COMM domain containing 5 [Source:HGNC Symbol;Acc:HGNC:17902]
SB0247CVR_bridger_k30_10301	20.67	13.73	NonToxin	NonToxin	GBEX01003969|Crotalus_adamanteus v-type proton ATPase subunit G 1-like protein
SB0247CVR_bridger_k30_10314	10.11	7.34	NonToxin	Uncharacterized	Uncharacterized
SB0247CVR_bridger_k30_10328	18.5	19.87	NonToxin	Uncharacterized	Uncharacterized
SB0247CVR_bridger_k30_10332	6.25	10.85	NonToxin	NonToxin	GBSH01001238|Boiga_irregularis guanine nucleotide-binding protein subunit
SB0247CVR_bridger_k30_10354	3.41	6.27	NonToxin	Uncharacterized	Uncharacterized
SB0247CVR_bridger_k30_10364	16.04	12.67	NonToxin	NonToxin	GAAZ01000997|Crotalus_horridus Guanine nucleotide-binding protein G(i) subunit
SB0247CVR_bridger_k30_10367	20.15	20.14	NonToxin	NonToxin	GDAY02001262|Agkistrodon_contortrix_contortrix legumain
SB0247CVR_bridger_k30_10370	4.66	6.05	NonToxin	NonToxin	GDAY02000875|Agkistrodon_contortrix_contortrix Fatty acyl-CoA reductase 1-like protein
SB0247CVR_bridger_k30_10375	7.36	4.83	NonToxin	NonToxin	GBEX01001630|Crotalus_adamanteus Inhibitor of growth protein 5-like protein
SB0247CVR_bridger_k30_10391	18.53	19.69	NonToxin	NonToxin	GBEX01000847|Crotalus_adamanteus cyclin-dependent kinase 5
SB0247CVR_bridger_k30_10432	17.12	12.16	NonToxin	NonToxin	GDAY02000381|Agkistrodon_contortrix_contortrix Calumenin-like protein
SB0247CVR_bridger_k30_10438	3.09	4.97	NonToxin	Uncharacterized	Uncharacterized
SB0247CVR_bridger_k30_10453	17.54	22.9	NonToxin	NonToxin	GBEX01000902|Crotalus_adamanteus dapper homolog 2
SB0247CVR_bridger_k30_10457	10.24	14.88	NonToxin	NonToxin	GBEX01000541|Crotalus_adamanteus calpain-1 catalytic subunit-like protein
SB0247CVR_bridger_k30_1047	40.58	35.77	NonToxin	NonToxin	GAAZ01002448|Crotalus_horridus Copper chaperone for superoxide dismutase-like
SB0247CVR_bridger_k30_10472	21.02	12.39	NonToxin	NonToxin	GAAZ01000931|Crotalus_horridus Fructose-bisphosphate aldolase B-like protein
SB0247CVR_bridger_k30_10494	5.9	6.76	NonToxin	Uncharacterized	Uncharacterized
SB0247CVR_bridger_k30_10507	18.89	23.25	NonToxin	NonToxin	GDAY02002291|Agkistrodon_contortrix_contortrix protein SGT1
SB0247CVR_bridger_k30_10516	18.25	22.72	NonToxin	Uncharacterized	Uncharacterized
SB0247CVR_bridger_k30_10519	18.53	23.19	NonToxin	NonToxin	GDAY02002556|Agkistrodon_contortrix_contortrix SAM pointed domain-containing Ets transcription
SB0247CVR_bridger_k30_10523	19.71	21.15	NonToxin	NonToxin	GAAZ01001208|Crotalus_horridus cyclin-dependent kinase 9
SB0247CVR_bridger_k30_10554	16.96	23.08	NonToxin	Uncharacterized	Uncharacterized
SB0247CVR_bridger_k30_10555	17.62	16	NonToxin	NonToxin	GAAZ01002645|Crotalus_horridus thioredoxin-related transmembrane protein 2
SB0247CVR_bridger_k30_1057	38.46	41.06	NonToxin	NonToxin	GAAZ01000602|Crotalus_horridus Putative low affinity copper uptake protein 2
SB0247CVR_bridger_k30_10570	4.35	3.25	NonToxin	NonToxin	methyltransferase like 15
SB0247CVR_bridger_k30_10584	2.71	1.47	NonToxin	Uncharacterized	Uncharacterized
SB0247CVR_bridger_k30_10604	16.89	15.79	NonToxin	NonToxin	GBEX01003044|Crotalus_adamanteus Dehydrogenase/reductase SDR family member
SB0247CVR_bridger_k30_10627	17.3	21.28	NonToxin	NonToxin	GAAZ01002837|Crotalus_horridus Ubiquitin-protein ligase E3A-like protein
SB0247CVR_bridger_k30_10646	19.39	21.44	NonToxin	Uncharacterized	Uncharacterized
SB0247CVR_bridger_k30_10692	17.75	29.07	NonToxin	NonToxin	GBEX01003717|Crotalus_adamanteus tropomodulin-3-like protein
SB0247CVR_bridger_k30_10701	13.51	12.07	NonToxin	NonToxin	GBEX01001991|Crotalus_adamanteus Microspherule protein 1-like protein
SB0247CVR_bridger_k30_10702	1.67	1.52	NonToxin	Uncharacterized	Uncharacterized
SB0247CVR_bridger_k30_10706	19.32	15.19	NonToxin	NonToxin	ENSPVIG00000020291|ENSPVIP00000027293|NDUFS2 NDUFS2 NADH:ubiquinone oxidoreductase core subunit S2 [Source:NCBI gene;Acc:110081004]
SB0247CVR_bridger_k30_1077	616.73	649.22	NonToxin	NonToxin	GAAZ01002703|Crotalus_horridus ADP/ATP translocase 2-like protein
SB0247CVR_bridger_k30_10795	6.67	6.48	NonToxin	NonToxin	Myb/SANT-like DNA-binding domain containing 1
SB0247CVR_bridger_k30_10807	13.16	9.74	NonToxin	Uncharacterized	Uncharacterized
SB0247CVR_bridger_k30_10825	10.76	8.45	NonToxin	NonToxin	GBEX01000419|Crotalus_adamanteus mitotic checkpoint protein BUB3-like
SB0247CVR_bridger_k30_10844	23.57	31.89	NonToxin	NonToxin	GBSH01002979|Boiga_irregularis U6 snRNA-associated Sm-like protein LSm4 isoform
SB0247CVR_bridger_k30_10846	18.51	34.99	NonToxin	NonToxin	vesicle-associated membrane protein 7
SB0247CVR_bridger_k30_10879	15.42	14.1	NonToxin	NonToxin	GDAY02000843|Agkistrodon_contortrix_contortrix FACT complex subunit SPT16
SB0247CVR_bridger_k30_10886	11.3	10.1	NonToxin	NonToxin	GBSH01002034|Boiga_irregularis Phosphatidate phosphatase PPAPDC1B
SB0247CVR_bridger_k30_1096	482.78	542.35	NonToxin	NonToxin	GAAZ01002128|Crotalus_horridus 60S ribosomal protein L10
SB0247CVR_bridger_k30_1097	615.96	659.37	NonToxin	NonToxin	GBEW01000886|Micrurus_fulvius 40S ribosomal protein S16
SB0247CVR_bridger_k30_1098	450.96	498.4	NonToxin	NonToxin	GBEW01000891|Micrurus_fulvius 40S ribosomal protein S21
SB0247CVR_bridger_k30_11010	10.14	8.4	NonToxin	NonToxin	GDAY02000731|Agkistrodon_contortrix_contortrix cytoplasmic dynein 1 light intermediate chain 2
SB0247CVR_bridger_k30_11056	15.57	15.21	NonToxin	NonToxin	GAAZ01002874|Crotalus_horridus UPF0449 protein C19orf25-like protein
SB0247CVR_bridger_k30_11073	8.71	1.11	NonToxin	Uncharacterized	Uncharacterized
SB0247CVR_bridger_k30_11074	18.39	14.78	NonToxin	NonToxin	ENSNSUP00000026055,1
SB0247CVR_bridger_k30_11085	16.6	22.66	NonToxin	NonToxin	GAAZ01002083|Crotalus_horridus RING finger protein 121
SB0247CVR_bridger_k30_11088	14.29	12.05	NonToxin	Uncharacterized	Uncharacterized
SB0247CVR_bridger_k30_11091	16.9	13.08	NonToxin	NonToxin	GAAZ01000573|Crotalus_horridus Copine-3-like protein
SB0247CVR_bridger_k30_11109	14.82	22.58	NonToxin	Uncharacterized	Uncharacterized
SB0247CVR_bridger_k30_11134	12.17	14.54	NonToxin	NonToxin	GBEX01002699|Crotalus_adamanteus ras-related protein Rab-35
SB0247CVR_bridger_k30_11195	13.66	10.68	NonToxin	NonToxin	GBEX01000204|Crotalus_adamanteus Angio-associated migratory cell protein-like
SB0247CVR_bridger_k30_11197	11.02	9.44	NonToxin	NonToxin	GAAZ01002672|Crotalus_horridus Protein Tob2
SB0247CVR_bridger_k30_112	72.04	79.82	NonToxin	NonToxin	penta-EF-hand domain containing 1
SB0247CVR_bridger_k30_1122	351.04	120.24	NonToxin	NonToxin	GBEX01002348|Crotalus_adamanteus Protein OS-9
SB0247CVR_bridger_k30_11228	12.21	21.28	NonToxin	NonToxin	ENSACAG00000004735|ENSACAP00000004705|COL6A1 COL6A1 collagen type VI alpha 1 chain [Source:NCBI gene;Acc:100558915]
SB0247CVR_bridger_k30_1124	2.49	1.09	NonToxin	NonToxin	N-acetylglucosamine-1-phosphate transferase, gamma subunit
SB0247CVR_bridger_k30_11256	17.4	15.31	NonToxin	NonToxin	transcription factor 25 (basic helix-loop-helix)
SB0247CVR_bridger_k30_11262	15.25	15.51	NonToxin	NonToxin	ENSACAG00000002040|ENSACAP00000002032|FAAH FAAH fatty-acid amide hydrolase 1 [Source:NCBI gene;Acc:100555796]
SB0247CVR_bridger_k30_11265	5.42	8.79	NonToxin	Uncharacterized	Uncharacterized
SB0247CVR_bridger_k30_11272	17.55	17.44	NonToxin	NonToxin	GDAY02001028|Agkistrodon_contortrix_contortrix hypothetical protein
SB0247CVR_bridger_k30_11291	16.9	22.6	NonToxin	NonToxin	GDAY02002692|Agkistrodon_contortrix_contortrix Trafficking protein particle complex subunit
SB0247CVR_bridger_k30_11296	18.44	16.08	NonToxin	NonToxin	GBEW01000230|Micrurus_fulvius Charged multivesicular body protein 2a-like
SB0247CVR_bridger_k30_11324	16.39	16.12	NonToxin	NonToxin	GAAZ01001516|Crotalus_horridus Mitochondrial import receptor subunit TOM40-like
SB0247CVR_bridger_k30_11338	12.83	12.65	NonToxin	NonToxin	GAAZ01002407|Crotalus_horridus Sphingosine-1-phosphate lyase 1
SB0247CVR_bridger_k30_1135	17.12	16.61	NonToxin	NonToxin	ENSNSUP00000007174,1|TFAP2A TFAP2A transcription factor AP-2 alpha [Source:HGNC Symbol;Acc:HGNC:11742]
SB0247CVR_bridger_k30_11352	19.01	16.9	NonToxin	NonToxin	GAAZ01000829|Crotalus_horridus ER lumen protein retaining receptor 1
SB0247CVR_bridger_k30_11359	6.57	2.82	NonToxin	NonToxin	GBEX01003944|Crotalus_adamanteus vitamin D3 receptor
SB0247CVR_bridger_k30_11380	6.91	3.19	NonToxin	NonToxin	GBEX01003486|Crotalus_adamanteus acyl-protein thioesterase 1-like
SB0247CVR_bridger_k30_11405	15.31	15.93	NonToxin	NonToxin	GAAZ01002475|Crotalus_horridus Syntaxin-binding protein 2
SB0247CVR_bridger_k30_11419	8.38	3.59	NonToxin	NonToxin	GBEX01000052|Crotalus_adamanteus alpha-1,3-mannosyl-glycoprotein
SB0247CVR_bridger_k30_11475	13.37	14.52	NonToxin	NonToxin	GDAY02000883|Agkistrodon_contortrix_contortrix F-box/LRR-repeat protein 5-like protein
SB0247CVR_bridger_k30_11483	12.03	14.91	NonToxin	NonToxin	GBSH01001409|Boiga_irregularis putative protein KIAA1370-like
SB0247CVR_bridger_k30_11545	10.25	4.54	NonToxin	Uncharacterized	Uncharacterized
SB0247CVR_bridger_k30_11569	19.86	14.41	NonToxin	NonToxin	GAAZ01000251|Crotalus_horridus Aurora kinase A-interacting protein-like
SB0247CVR_bridger_k30_11572	11.91	3.52	NonToxin	NonToxin	GAAZ01001517|Crotalus_horridus mitochondrial import inner membrane translocase
SB0247CVR_bridger_k30_11577	12.73	17.41	NonToxin	NonToxin	GAAZ01001081|Crotalus_horridus histone acetyltransferase type B catalytic
SB0247CVR_bridger_k30_11578	14.42	16.38	NonToxin	NonToxin	GAAZ01001395|Crotalus_horridus methionine aminopeptidase 1-like protein
SB0247CVR_bridger_k30_11607	15.35	20.81	NonToxin	NonToxin	GBEX01000025|Crotalus_adamanteus AAR2-like protein
SB0247CVR_bridger_k30_11658	13.66	19.29	NonToxin	NonToxin	GAAZ01000080|Crotalus_horridus Adenosylhomocysteinase A-like protein
SB0247CVR_bridger_k30_1168	182.1	109.8	NonToxin	NonToxin	GAAZ01002917|Crotalus_horridus Vigilin-like protein
SB0247CVR_bridger_k30_11683	15.3	15.65	NonToxin	NonToxin	GBSH01001505|Boiga_irregularis lipid phosphate phosphohydrolase 3
SB0247CVR_bridger_k30_11692	9.84	11.68	NonToxin	NonToxin	|ENSACAG00000012647|ENSACAP00000012781| complement C4 [Source:NCBI gene;Acc:100554736]
SB0247CVR_bridger_k30_11712	22.39	23.58	NonToxin	Uncharacterized	Uncharacterized
SB0247CVR_bridger_k30_11717	14.01	13.56	NonToxin	NonToxin	ENSPVIG00000011829|ENSPVIP00000015355|PSMD5 PSMD5 proteasome 26S subunit, non-ATPase 5 [Source:HGNC Symbol;Acc:HGNC:9563]
SB0247CVR_bridger_k30_11740	5.81	2.23	NonToxin	NonToxin	GDAY02002384|Agkistrodon_contortrix_contortrix SS18-like protein 2-like isoform 1
SB0247CVR_bridger_k30_11753	10.47	11.52	NonToxin	NonToxin	GAAZ01001280|Crotalus_horridus LITAF-like protein
SB0247CVR_bridger_k30_11774	15.18	15.01	NonToxin	NonToxin	GBSH01002043|Boiga_irregularis peptidyl-prolyl cis-trans isomerase-like 3
SB0247CVR_bridger_k30_11803	8.72	9.31	NonToxin	NonToxin	chromosome 12 open reading frame 49
SB0247CVR_bridger_k30_1183	396.78	381.87	NonToxin	NonToxin	GAAZ01002354|Crotalus_horridus Signal peptidase complex subunit 3-like protein
SB0247CVR_bridger_k30_11875	19.58	26.23	NonToxin	NonToxin	GAAZ01001292|Crotalus_horridus hypothetical protein LOC100557119
SB0247CVR_bridger_k30_11886	15.6	21.28	NonToxin	NonToxin	GDAY02000904|Agkistrodon_contortrix_contortrix Follistatin-related protein 1-like protein
SB0247CVR_bridger_k30_11909	16.34	15.8	NonToxin	NonToxin	ENSPVIG00000005020|ENSPVIP00000006040|C14orf119 C14orf119 chromosome unknown C14orf119 homolog [Source:NCBI gene;Acc:110071716]
SB0247CVR_bridger_k30_11912	8.29	14.27	NonToxin	Uncharacterized	Uncharacterized
SB0247CVR_bridger_k30_11935	16.73	11.61	NonToxin	NonToxin	GBEX01003264|Crotalus_adamanteus spermidine synthase
SB0247CVR_bridger_k30_1195	24.02	16.94	NonToxin	NonToxin	GDAY02002576|Agkistrodon_contortrix_contortrix thioredoxin reductase 3-like protein
SB0247CVR_bridger_k30_11953	10.57	11.95	NonToxin	NonToxin	GBEW01000161|Micrurus_fulvius C20orf11-like protein
SB0247CVR_bridger_k30_11967	16.38	10.89	NonToxin	NonToxin	GDAY02000984|Agkistrodon_contortrix_contortrix Golgin subfamily A member 7-like protein
SB0247CVR_bridger_k30_12005	14.93	25.29	NonToxin	NonToxin	GBEW01000629|Micrurus_fulvius neurocalcin-delta
SB0247CVR_bridger_k30_12026	8.98	7.6	NonToxin	NonToxin	GBEX01003751|Crotalus_adamanteus tumor suppressor candidate 2-like protein
SB0247CVR_bridger_k30_12041	17	14.01	NonToxin	NonToxin	sorbitol dehydrogenase
SB0247CVR_bridger_k30_12052	11.16	13.68	NonToxin	NonToxin	GDAY02000991|Agkistrodon_contortrix_contortrix G patch domain and ankyrin repeats 1
SB0247CVR_bridger_k30_12053	14.9	16.78	NonToxin	NonToxin	ENSPVIG00000021713|ENSPVIP00000029961|MTMR1 MTMR1 myotubularin related protein 1 [Source:NCBI gene;Acc:110082978]
SB0247CVR_bridger_k30_12059	15.12	18.86	NonToxin	NonToxin	ENSACAG00000010072|ENSACAP00000009972|MAP2K5 MAP2K5 mitogen-activated protein kinase kinase 5 [Source:NCBI gene;Acc:100562970]
SB0247CVR_bridger_k30_12079	2.11	4.78	NonToxin	NonToxin	cilia and flagella associated protein 36
SB0247CVR_bridger_k30_12093	17.61	17.98	NonToxin	NonToxin	GBEX01001103|Crotalus_adamanteus Ppithelial membrane protein 1-like protein
SB0247CVR_bridger_k30_12144	13.53	10.6	NonToxin	NonToxin	GAAZ01001542|Crotalus_horridus Soluble calcium-activated nucleotidase 1
SB0247CVR_bridger_k30_12210	13.66	6.3	NonToxin	NonToxin	GAAZ01000072|Crotalus_horridus Adaptor-related protein complex 1, gamma 2
SB0247CVR_bridger_k30_12218	12.15	16.82	NonToxin	NonToxin	GDAY02001579|Agkistrodon_contortrix_contortrix Sorting nexin-11
SB0247CVR_bridger_k30_12243	9.05	8.98	NonToxin	NonToxin	GDAY02002642|Agkistrodon_contortrix_contortrix Transmembrane protein 125
SB0247CVR_bridger_k30_12246	10.91	13.34	NonToxin	NonToxin	GAAZ01002243|Crotalus_horridus Sec23 B-like protein
SB0247CVR_bridger_k30_12256	14.88	16.29	NonToxin	NonToxin	GBEX01004155|Crotalus_adamanteus ectonucleotide pyrophosphatase/phosphodiesterase
SB0247CVR_bridger_k30_12294	2.05	2.95	NonToxin	NonToxin	sclerostin domain containing 1
SB0247CVR_bridger_k30_12304	10.05	13.94	NonToxin	NonToxin	GBEX01003191|Crotalus_adamanteus signal transducing adapter molecule 2-like
SB0247CVR_bridger_k30_12329	13.97	13.65	NonToxin	NonToxin	ENSNSUP00000005225,1|PHF10 PHF10 PHD finger protein 10 [Source:HGNC Symbol;Acc:HGNC:18250]
SB0247CVR_bridger_k30_12336	16.34	15.33	NonToxin	NonToxin	GBSI01000326|Hypsiglena_sp,_JMG-2014 Beta-catenin-like protein 1-like
SB0247CVR_bridger_k30_12345	19.39	13.67	NonToxin	NonToxin	GAAZ01000718|Crotalus_horridus DnaJ subfamily C member 15-like protein
SB0247CVR_bridger_k30_12388	10.38	8.01	NonToxin	NonToxin	GAAZ01000081|Crotalus_horridus BCL2/adenovirus E1B 19 kDa protein-interacting
SB0247CVR_bridger_k30_12389	16.16	12.24	NonToxin	NonToxin	GBEX01000813|Crotalus_adamanteus tyrosine-protein kinase CSK
SB0247CVR_bridger_k30_12416	16.63	13.52	NonToxin	NonToxin	GAAZ01001828|Crotalus_horridus peroxisomal membrane protein 4-like protein
SB0247CVR_bridger_k30_12559	9.02	10.35	NonToxin	Uncharacterized	Uncharacterized
SB0247CVR_bridger_k30_12560	12.46	11.6	NonToxin	NonToxin	GBEX01002039|Crotalus_adamanteus MORC family CW-type zinc finger protein 2
SB0247CVR_bridger_k30_12574	12.57	21.88	NonToxin	NonToxin	GAAZ01001031|Crotalus_horridus growth arrest-specific protein 6-like protein
SB0247CVR_bridger_k30_126	72.29	80.35	NonToxin	NonToxin	GAAZ01000488|Crotalus_horridus Cell cycle control protein 50B-like protein
SB0247CVR_bridger_k30_12603	12.83	15.59	NonToxin	NonToxin	ENSPVIG00000017998|ENSPVIP00000023844|KAZN KAZN kazrin-like [Source:NCBI gene;Acc:110072610]
SB0247CVR_bridger_k30_12622	14.49	13.34	NonToxin	NonToxin	RNA binding motif protein 45
SB0247CVR_bridger_k30_12645	11.43	14.59	NonToxin	NonToxin	GAAZ01000362|Crotalus_horridus Putative C4orf29-like protein
SB0247CVR_bridger_k30_1266	516.91	525.01	NonToxin	NonToxin	GDAY02000359|Agkistrodon_contortrix_contortrix 45 kDa calcium-binding protein
SB0247CVR_bridger_k30_12708	16.35	18.17	NonToxin	NonToxin	ENSPVIG00000011317|ENSPVIP00000014651|PCOLCE PCOLCE procollagen C-endopeptidase enhancer [Source:NCBI gene;Acc:110082389]
SB0247CVR_bridger_k30_12741	12.31	13.94	NonToxin	NonToxin	carboxypeptidase E
SB0247CVR_bridger_k30_12778	21.39	18.48	NonToxin	NonToxin	GBSH01002883|Boiga_irregularis Trafficking protein particle complex subunit
SB0247CVR_bridger_k30_12781	13.16	5.15	NonToxin	NonToxin	GBEX01000270|Crotalus_adamanteus Protein arginine N-methyltransferase 7-like
SB0247CVR_bridger_k30_12790	9.51	14.49	NonToxin	NonToxin	GDAY02001112|Agkistrodon_contortrix_contortrix huntingtin interacting protein 1 related isoform
SB0247CVR_bridger_k30_12820	5.74	3.55	NonToxin	NonToxin	GBEX01001609|Crotalus_adamanteus U3 small nucleolar ribonucleoprotein IMP4-like
SB0247CVR_bridger_k30_12837	11.53	11.83	NonToxin	NonToxin	GDAY02000376|Agkistrodon_contortrix_contortrix Calpain-1 catalytic subunit-like protein
SB0247CVR_bridger_k30_12850	13.4	18.29	NonToxin	Uncharacterized	Uncharacterized
SB0247CVR_bridger_k30_12857	12.77	15.28	NonToxin	NonToxin	ENSNSUP00000001236,1|PAFAH1B3 PAFAH1B3 platelet activating factor acetylhydrolase 1b catalytic subunit 3 [Source:HGNC Symbol;Acc:HGNC:8576]
SB0247CVR_bridger_k30_12864	15.19	19.6	NonToxin	NonToxin	GAAZ01001824|Crotalus_horridus Pleckstrin domain-containing family J member
SB0247CVR_bridger_k30_1287	511.22	52.5	NonToxin	NonToxin	GAAZ01001532|Crotalus_horridus Myosin light chain
SB0247CVR_bridger_k30_12877	11.49	14.51	NonToxin	NonToxin	GDAY02001291|Agkistrodon_contortrix_contortrix hypothetical protein
SB0247CVR_bridger_k30_12940	11.62	9.27	NonToxin	NonToxin	GAAZ01002212|Crotalus_horridus ruvB-like 2-like protein
SB0247CVR_bridger_k30_12988	4.91	5.69	NonToxin	Uncharacterized	Uncharacterized
SB0247CVR_bridger_k30_13003	7.11	9.53	NonToxin	NonToxin	GAAZ01002047|Crotalus_horridus rho GTPase-activating protein 5-like protein
SB0247CVR_bridger_k30_13096	15.06	12.43	NonToxin	NonToxin	GDAY02002843|Agkistrodon_contortrix_contortrix E3 ubiquitin-protein ligase MARCH2
SB0247CVR_bridger_k30_13145	8.49	6.84	NonToxin	NonToxin	GBSI01001219|Hypsiglena_sp,_JMG-2014 kinesin-like protein KIF1C
SB0247CVR_bridger_k30_13164	12.38	10.08	NonToxin	Uncharacterized	Uncharacterized
SB0247CVR_bridger_k30_13194	14.63	13.68	NonToxin	NonToxin	GAAZ01002642|Crotalus_horridus Transmembrane protein 184C
SB0247CVR_bridger_k30_13196	13.75	12.72	NonToxin	NonToxin	ENSPVIG00000005290|ENSPVIP00000006386|DTNBP1 DTNBP1 dystrobrevin binding protein 1 [Source:NCBI gene;Acc:110081682]
SB0247CVR_bridger_k30_13229	14.46	17.35	NonToxin	NonToxin	GAAZ01002211|Crotalus_horridus ruvB-like 1-like protein
SB0247CVR_bridger_k30_1323	184.77	162.51	NonToxin	NonToxin	GBEX01002775|Crotalus_adamanteus NADH-cytochrome b5 reductase 3-like protein
SB0247CVR_bridger_k30_13249	11.61	26.73	NonToxin	NonToxin	GAAZ01000476|Crotalus_horridus CDC28 protein kinase regulatory subunit 1B
SB0247CVR_bridger_k30_1330	507.12	711.42	NonToxin	NonToxin	GAAZ01002184|Crotalus_horridus 40S ribosomal protein S19
SB0247CVR_bridger_k30_13311	15.24	13.65	NonToxin	NonToxin	tenomodulin
SB0247CVR_bridger_k30_13314	2.8	4	NonToxin	Uncharacterized	Uncharacterized
SB0247CVR_bridger_k30_13321	17.86	18.61	NonToxin	NonToxin	ENSNSUP00000006987,1|PSMG4 PSMG4 proteasome assembly chaperone 4 [Source:HGNC Symbol;Acc:HGNC:21108]
SB0247CVR_bridger_k30_1334	30.75	24.22	NonToxin	Uncharacterized	Uncharacterized
SB0247CVR_bridger_k30_13365	13.28	12.63	NonToxin	NonToxin	guanine nucleotide binding protein (G protein), alpha z polypeptide
SB0247CVR_bridger_k30_13370	10.92	9.11	NonToxin	NonToxin	ENSNSUP00000006437,1|GSTO1 GSTO1 glutathione S-transferase omega 1 [Source:HGNC Symbol;Acc:HGNC:13312]
SB0247CVR_bridger_k30_13387	11.51	13.16	NonToxin	NonToxin	GDAY02002536|Agkistrodon_contortrix_contortrix Transcription factor AP-1-like protein
SB0247CVR_bridger_k30_13388	20.55	9.75	NonToxin	Uncharacterized	Uncharacterized
SB0247CVR_bridger_k30_13403	19.97	19.9	NonToxin	NonToxin	GAAZ01000875|Crotalus_horridus Protein FAM195B-like protein
SB0247CVR_bridger_k30_13406	10.32	11.03	NonToxin	NonToxin	GBEW01000724|Micrurus_fulvius Protein phosphatase 1B
SB0247CVR_bridger_k30_13414	9.38	8.21	NonToxin	NonToxin	GDAY02001758|Agkistrodon_contortrix_contortrix phosphoacetylglucosamine mutase-like protein
SB0247CVR_bridger_k30_13428	7.38	6.42	NonToxin	NonToxin	GBEX01002651|Crotalus_adamanteus proteasome assembly chaperone 2
SB0247CVR_bridger_k30_13469	7.78	7.11	NonToxin	NonToxin	ENSNSUP00000009013,1
SB0247CVR_bridger_k30_13487	12.58	7.06	NonToxin	Uncharacterized	Uncharacterized
SB0247CVR_bridger_k30_13492	11.04	12.35	NonToxin	NonToxin	GAAZ01001847|Crotalus_horridus protein phosphatase 2A, regulatory subunit B
SB0247CVR_bridger_k30_1355	3.94	3.74	NonToxin	Uncharacterized	Uncharacterized
SB0247CVR_bridger_k30_13560	12.26	9.09	NonToxin	NonToxin	GBEX01003607|Crotalus_adamanteus transmembrane protein 185A
SB0247CVR_bridger_k30_13566	10.09	13.35	NonToxin	NonToxin	GBSH01003008|Boiga_irregularis Ubiquitin-conjugating enzyme E2 J2-like
SB0247CVR_bridger_k30_13584	9.72	11.12	NonToxin	NonToxin	ATP-binding cassette, sub-family F (GCN20), member 3
SB0247CVR_bridger_k30_1360	3.96	3.37	NonToxin	Uncharacterized	Uncharacterized
SB0247CVR_bridger_k30_13611	12.54	12.15	NonToxin	NonToxin	ENSNSUP00000023959,1|MRPS30 MRPS30 mitochondrial ribosomal protein S30 [Source:HGNC Symbol;Acc:HGNC:8769]
SB0247CVR_bridger_k30_13626	6.03	4.73	NonToxin	Uncharacterized	Uncharacterized
SB0247CVR_bridger_k30_13637	4.37	3.22	NonToxin	NonToxin	ENSNSUP00000003768,1|SP1 SP1 Sp1 transcription factor [Source:HGNC Symbol;Acc:HGNC:11205]
SB0247CVR_bridger_k30_1366	53.44	52.52	NonToxin	NonToxin	GDAY02000876|Agkistrodon_contortrix_contortrix Fructose-1,6-bisphosphatase 1-like protein
SB0247CVR_bridger_k30_13730	11.14	10.63	NonToxin	NonToxin	GDAY02002249|Agkistrodon_contortrix_contortrix Serine/threonine-protein kinase 19-like protein
SB0247CVR_bridger_k30_13731	12.08	20.38	NonToxin	NonToxin	GAAZ01002616|Crotalus_horridus transmembrane protein 51
SB0247CVR_bridger_k30_13741	6.01	6.51	NonToxin	NonToxin	ENSPVIG00000005806|ENSPVIP00000007081|CYTH3 CYTH3 cytohesin 3 [Source:NCBI gene;Acc:110082229]
SB0247CVR_bridger_k30_13769	11.76	15.91	NonToxin	NonToxin	GDAY02001268|Agkistrodon_contortrix_contortrix Leucine-rich repeat-containing protein 1-like
SB0247CVR_bridger_k30_13777	15.56	7.27	NonToxin	NonToxin	ENSNSUP00000003745,1|ISCA2 ISCA2 iron-sulfur cluster assembly 2 [Source:HGNC Symbol;Acc:HGNC:19857]
SB0247CVR_bridger_k30_13833	14.53	15.77	NonToxin	NonToxin	GBEW01000573|Micrurus_fulvius Mitogen-activated protein kinase scaffold
SB0247CVR_bridger_k30_13842	7.34	5.38	NonToxin	NonToxin	ENSPVIG00000024451|ENSPVIP00000033464|BTBD1 BTBD1 BTB domain containing 1 [Source:NCBI gene;Acc:110077248]
SB0247CVR_bridger_k30_13872	9.79	18.94	NonToxin	NonToxin	GAAZ01001687|Crotalus_horridus Protein odd-skipped-related 1-like protein
SB0247CVR_bridger_k30_13882	12.8	12.75	NonToxin	NonToxin	tRNA isopentenyltransferase 1
SB0247CVR_bridger_k30_13907	8.11	7.44	NonToxin	NonToxin	GDAY02002902|Agkistrodon_contortrix_contortrix Vang-like protein 2-A
SB0247CVR_bridger_k30_13912	7.73	7.85	NonToxin	NonToxin	GDAY02002405|Agkistrodon_contortrix_contortrix Strawberry notch 1-like protein
SB0247CVR_bridger_k30_13925	3.14	13.32	NonToxin	Uncharacterized	Uncharacterized
SB0247CVR_bridger_k30_13936	7.44	2.75	NonToxin	NonToxin	ENSNSUP00000014197,1|STC2 STC2 stanniocalcin 2 [Source:HGNC Symbol;Acc:HGNC:11374]
SB0247CVR_bridger_k30_13950	10.41	10.24	NonToxin	NonToxin	GDAY02001157|Agkistrodon_contortrix_contortrix Importin subunit alpha-1-like protein
SB0247CVR_bridger_k30_13951	10.57	11.41	NonToxin	NonToxin	GBEX01002325|Crotalus_adamanteus Nuclear pore complex protein Nup93
SB0247CVR_bridger_k30_13957	8.65	8.37	NonToxin	NonToxin	GAAZ01001332|Crotalus_horridus acyl-coenzyme A thioesterase 2,
SB0247CVR_bridger_k30_14010	2.53	2.67	NonToxin	Uncharacterized	Uncharacterized
SB0247CVR_bridger_k30_1402	42.45	44.51	NonToxin	NonToxin	GBEX01003904|Crotalus_adamanteus UPF0663 transmembrane protein C17orf28
SB0247CVR_bridger_k30_14024	11.37	9.45	NonToxin	NonToxin	ENSACAG00000011587|ENSACAP00000011364|UBXN2A UBXN2A UBX domain protein 2A [Source:NCBI gene;Acc:100558518]
SB0247CVR_bridger_k30_14055	6.94	6.92	NonToxin	Uncharacterized	Uncharacterized
SB0247CVR_bridger_k30_14063	8.77	8.68	NonToxin	NonToxin	GAAZ01001599|Crotalus_horridus Neuroepithelial cell-transforming 1 protein
SB0247CVR_bridger_k30_14091	9.71	11.99	NonToxin	NonToxin	GAAZ01002395|Crotalus_horridus sorting nexin-33-like protein
SB0247CVR_bridger_k30_1411	398.12	539.29	NonToxin	NonToxin	GDAY02001152|Agkistrodon_contortrix_contortrix Integral membrane protein 2A-like protein
SB0247CVR_bridger_k30_14134	10.63	11.53	NonToxin	NonToxin	GBEX01003247|Crotalus_adamanteus SOSS complex subunit B1
SB0247CVR_bridger_k30_14143	7.97	8.32	NonToxin	NonToxin	GBEX01002812|Crotalus_adamanteus rho-related GTP-binding protein RhoB precursor
SB0247CVR_bridger_k30_14160	11.08	11.73	NonToxin	NonToxin	GAAZ01000694|Crotalus_horridus 1,2-dihydroxy-3-keto-5-methylthiopentene
SB0247CVR_bridger_k30_14172	14.86	10.41	NonToxin	NonToxin	GBSI01001400|Hypsiglena_sp,_JMG-2014 MOB kinase activator 1B
SB0247CVR_bridger_k30_14175	9.54	13.65	NonToxin	NonToxin	GBEX01000226|Crotalus_adamanteus Annexin A4-like protein
SB0247CVR_bridger_k30_14197	6.41	4.83	NonToxin	NonToxin	GBEX01000461|Crotalus_adamanteus hcp beta-lactamase-like C1orf163-like protein
SB0247CVR_bridger_k30_14212	13.23	16.64	NonToxin	Uncharacterized	Uncharacterized
SB0247CVR_bridger_k30_14213	7.23	7.95	NonToxin	NonToxin	ariadne RBR E3 ubiquitin protein ligase 2
SB0247CVR_bridger_k30_14217	8.71	7.92	NonToxin	NonToxin	GAAZ01002936|Crotalus_horridus von Willebrand factor A domain-containing
SB0247CVR_bridger_k30_14221	11.14	9.61	NonToxin	NonToxin	GDAY02001442|Agkistrodon_contortrix_contortrix Matrix metalloproteinase-23
SB0247CVR_bridger_k30_14230	9.73	13.25	NonToxin	NonToxin	ENSNSUP00000023915,1|WFS1 WFS1 wolframin ER transmembrane glycoprotein [Source:HGNC Symbol;Acc:HGNC:12762]
SB0247CVR_bridger_k30_1427	8.46	11.67	NonToxin	NonToxin	interleukin 1 receptor accessory protein
SB0247CVR_bridger_k30_1428	419.17	368.33	NonToxin	NonToxin	GAAZ01002170|Crotalus_horridus 60S ribosomal protein L9
SB0247CVR_bridger_k30_14281	10.3	14.59	NonToxin	NonToxin	GDAY02001457|Agkistrodon_contortrix_contortrix Metalloproteinase inhibitor 3-like protein
SB0247CVR_bridger_k30_14301	12.43	17.49	NonToxin	Uncharacterized	Uncharacterized
SB0247CVR_bridger_k30_1432	299.9	274.38	NonToxin	NonToxin	GBSH01000401|Boiga_irregularis Bax inhibitor 1-like protein
SB0247CVR_bridger_k30_14354	12.05	11.87	NonToxin	NonToxin	ENSNSUP00000006839,1|SLC17A5 SLC17A5 solute carrier family 17 member 5 [Source:HGNC Symbol;Acc:HGNC:10933]
SB0247CVR_bridger_k30_14396	1.87	2.79	NonToxin	Uncharacterized	Uncharacterized
SB0247CVR_bridger_k30_1443	352.92	279.95	NonToxin	NonToxin	GDAY02002183|Agkistrodon_contortrix_contortrix protein S100-A10
SB0247CVR_bridger_k30_14475	5.87	6.67	NonToxin	NonToxin	GBEX01003340|Crotalus_adamanteus synaptojanin-2-binding protein
SB0247CVR_bridger_k30_14495	11.14	11.92	NonToxin	NonToxin	GBEX01002691|Crotalus_adamanteus pyruvate kinase muscle isozyme
SB0247CVR_bridger_k30_14506	7.98	7.37	NonToxin	NonToxin	GDAY02000397|Agkistrodon_contortrix_contortrix solute carrier family 25 member 42
SB0247CVR_bridger_k30_14509	7.47	11.07	NonToxin	NonToxin	ENSNSUP00000010970,1|PEX26 PEX26 peroxisomal biogenesis factor 26 [Source:HGNC Symbol;Acc:HGNC:22965]
SB0247CVR_bridger_k30_14517	15.44	22.93	NonToxin	NonToxin	GBSI01001338|Hypsiglena_sp,_JMG-2014 mediator of RNA polymerase II transcription
SB0247CVR_bridger_k30_1454	444.48	499.42	NonToxin	NonToxin	GAAZ01002805|Crotalus_horridus Ubiquitin-like protein FUBI-like protein
SB0247CVR_bridger_k30_14551	13.51	18.06	NonToxin	NonToxin	GDAY02001093|Agkistrodon_contortrix_contortrix Heat-responsive protein 12
SB0247CVR_bridger_k30_14553	11.22	7.47	NonToxin	NonToxin	GBSH01002037|Boiga_irregularis peptidyl-prolyl cis-trans isomerase D-like
SB0247CVR_bridger_k30_14581	12.02	8.65	NonToxin	NonToxin	GBSH01002426|Boiga_irregularis SAYSvFN domain-containing protein 1
SB0247CVR_bridger_k30_14607	12.77	14.49	NonToxin	NonToxin	GBEX01002023|Crotalus_adamanteus Methylmalonic aciduria and homocystinuria type
SB0247CVR_bridger_k30_14609	8.47	7.47	NonToxin	NonToxin	GAAZ01002820|Crotalus_horridus e3 ubiquitin-protein ligase RNF115-like protein
SB0247CVR_bridger_k30_14610	9.93	8.79	NonToxin	NonToxin	GAAZ01001352|Crotalus_horridus dolichol-phosphate mannosyltransferase subunit
SB0247CVR_bridger_k30_14695	10.66	9.01	NonToxin	NonToxin	GDAY02000144|Agkistrodon_contortrix_contortrix Androgen-induced 1 protein-like protein
SB0247CVR_bridger_k30_14697	9.33	9.3	NonToxin	NonToxin	GBEX01001729|Crotalus_adamanteus kinesin light chain 4-like protein
SB0247CVR_bridger_k30_14714	6.71	7.01	NonToxin	NonToxin	GBEX01000850|Crotalus_adamanteus Calcium signal-modulating cyclophilin
SB0247CVR_bridger_k30_1476	326.5	45.12	NonToxin	NonToxin	GBEW01000022|Micrurus_fulvius Actin, alpha skeletal muscle
SB0247CVR_bridger_k30_14776	8.11	7.62	NonToxin	NonToxin	GBSH01002729|Boiga_irregularis Alpha-globin transcription factor CP2-like
SB0247CVR_bridger_k30_14782	9	7.81	NonToxin	NonToxin	solute carrier family 39 (zinc transporter), member 13
SB0247CVR_bridger_k30_14791	9.52	3.98	NonToxin	NonToxin	ENSNSUP00000016812,1|DES DES desmin [Source:HGNC Symbol;Acc:HGNC:2770]
SB0247CVR_bridger_k30_14798	9.29	9.53	NonToxin	Uncharacterized	Uncharacterized
SB0247CVR_bridger_k30_14812	12.69	13.28	NonToxin	NonToxin	GAAZ01002630|Crotalus_horridus Transmembrane protein 127
SB0247CVR_bridger_k30_14813	8.49	4.12	NonToxin	NonToxin	|ENSACAG00000002805|ENSACAP00000002737| egl-9 family hypoxia inducible factor 1 [Source:NCBI gene;Acc:100559436]
SB0247CVR_bridger_k30_14843	11.24	19.58	NonToxin	NonToxin	GAAZ01000699|Crotalus_horridus diphosphomevalonate decarboxylase-like protein
SB0247CVR_bridger_k30_14845	11.72	9.3	NonToxin	NonToxin	ENSNSUP00000004679,1|TTC32 TTC32 tetratricopeptide repeat domain 32 [Source:HGNC Symbol;Acc:HGNC:32954]
SB0247CVR_bridger_k30_14872	8.88	8.61	NonToxin	NonToxin	GBEX01001623|Crotalus_adamanteus interferon regulatory factor 6
SB0247CVR_bridger_k30_14884	7.71	9.38	NonToxin	NonToxin	ENSNSUP00000014404,1|LIX1L LIX1L limb and CNS expressed 1 like [Source:HGNC Symbol;Acc:HGNC:28715]
SB0247CVR_bridger_k30_1490	12.19	11.39	NonToxin	NonToxin	GAAZ01002466|Crotalus_horridus Synaptotagmin-7
SB0247CVR_bridger_k30_14934	4.08	8.16	NonToxin	Uncharacterized	Uncharacterized
SB0247CVR_bridger_k30_15013	7.27	6.8	NonToxin	NonToxin	GBEX01001885|Crotalus_adamanteus Mannose-6-phosphate isomerase
SB0247CVR_bridger_k30_15027	9.57	12.43	NonToxin	NonToxin	ENSNSUP00000014134,1|DPT DPT dermatopontin [Source:HGNC Symbol;Acc:HGNC:3011]
SB0247CVR_bridger_k30_15059	6.24	7.89	NonToxin	Uncharacterized	Uncharacterized
SB0247CVR_bridger_k30_15082	9.83	7.17	NonToxin	NonToxin	GDAY02000248|Agkistrodon_contortrix_contortrix b9 domain-containing protein 1
SB0247CVR_bridger_k30_15098	6.76	6.57	NonToxin	Uncharacterized	Uncharacterized
SB0247CVR_bridger_k30_15119	8.6	6.32	NonToxin	NonToxin	GDAY02002004|Agkistrodon_contortrix_contortrix Rho GTPase-activating protein 1-like protein
SB0247CVR_bridger_k30_15181	11.66	11.08	NonToxin	Uncharacterized	Uncharacterized
SB0247CVR_bridger_k30_15193	7.85	13.63	NonToxin	NonToxin	GDAY02001204|Agkistrodon_contortrix_contortrix KH domain-containing, RNA-binding, signal
SB0247CVR_bridger_k30_15233	10.72	15.51	NonToxin	NonToxin	GAAZ01002397|Crotalus_horridus Serine protease 23-like protein
SB0247CVR_bridger_k30_15319	3.84	4.03	NonToxin	NonToxin	Uncharacterized protein
SB0247CVR_bridger_k30_1535	363.66	277.36	NonToxin	Uncharacterized	Uncharacterized
SB0247CVR_bridger_k30_15354	13.97	12.83	NonToxin	NonToxin	mannosidase, beta A, lysosomal-like
SB0247CVR_bridger_k30_15383	8.24	12.92	NonToxin	NonToxin	GDAY02002638|Agkistrodon_contortrix_contortrix transmembrane emp24 domain-containing protein 5
SB0247CVR_bridger_k30_15398	9.59	9.77	NonToxin	NonToxin	GDAY02001414|Agkistrodon_contortrix_contortrix 3-hydroxyisobutyrate dehydrogenase,
SB0247CVR_bridger_k30_15445	14.49	16.02	NonToxin	Uncharacterized	Uncharacterized
SB0247CVR_bridger_k30_1545	280.98	199.8	NonToxin	NonToxin	GDAY02000641|Agkistrodon_contortrix_contortrix Dolichyl-diphosphooligosaccharide--protein
SB0247CVR_bridger_k30_15455	9.38	9.88	NonToxin	NonToxin	ENSNSUP00000019230,1|MRPL4 MRPL4 mitochondrial ribosomal protein L4 [Source:HGNC Symbol;Acc:HGNC:14276]
SB0247CVR_bridger_k30_15463	10.24	16.68	NonToxin	Uncharacterized	Uncharacterized
SB0247CVR_bridger_k30_15475	9.13	17.13	NonToxin	NonToxin	GBEX01002316|Crotalus_adamanteus nuclear transcription factor Y subunit beta
SB0247CVR_bridger_k30_15509	1.53	4.43	NonToxin	Uncharacterized	Uncharacterized
SB0247CVR_bridger_k30_15526	7.96	5.68	NonToxin	Uncharacterized	Uncharacterized
SB0247CVR_bridger_k30_15569	9.51	13.86	NonToxin	NonToxin	ENSNSUP00000019717,1|SHFL SHFL shiftless antiviral inhibitor of ribosomal frameshifting [Source:HGNC Symbol;Acc:HGNC:25649]
SB0247CVR_bridger_k30_15585	10.13	8.56	NonToxin	Uncharacterized	Uncharacterized
SB0247CVR_bridger_k30_1559	332.36	400.6	NonToxin	NonToxin	ENSNSUP00000012494,1
SB0247CVR_bridger_k30_15593	7.06	13.57	NonToxin	NonToxin	GAAZ01000199|Crotalus_horridus Aquaporin-1-like protein
SB0247CVR_bridger_k30_15610	5.41	5.88	NonToxin	NonToxin	GBEX01001675|Crotalus_adamanteus josephin-2
SB0247CVR_bridger_k30_15666	4.29	3.49	NonToxin	NonToxin	nuclear receptor binding factor 2
SB0247CVR_bridger_k30_15671	15.85	7.47	NonToxin	Uncharacterized	Uncharacterized
SB0247CVR_bridger_k30_15699	10.45	12.74	NonToxin	NonToxin	ENSACAG00000016598|ENSACAP00000016316|GPKOW GPKOW G-patch domain and KOW motifs [Source:NCBI gene;Acc:100551559]
SB0247CVR_bridger_k30_15708	11.81	2.79	NonToxin	NonToxin	|ENSPVIG00000012497|ENSPVIP00000016144| phospholipid scramblase 2-like [Source:NCBI gene;Acc:110073042]
SB0247CVR_bridger_k30_15721	14.05	20.19	NonToxin	NonToxin	ENSPVIG00000014075|ENSPVIP00000018412|HTRA1 HTRA1 HtrA serine peptidase 1 [Source:HGNC Symbol;Acc:HGNC:9476]
SB0247CVR_bridger_k30_1573	121.44	151.68	NonToxin	NonToxin	MANSC domain containing 1
SB0247CVR_bridger_k30_15791	7.82	9.57	NonToxin	NonToxin	C-type lectin domain family 3, member A
SB0247CVR_bridger_k30_1594	5.6	4.18	NonToxin	Uncharacterized	Uncharacterized
SB0247CVR_bridger_k30_1595	2.61	2.64	NonToxin	Uncharacterized	Uncharacterized
SB0247CVR_bridger_k30_15967	3.74	6.97	NonToxin	Uncharacterized	Uncharacterized
SB0247CVR_bridger_k30_15969	7.59	8.86	NonToxin	Uncharacterized	Uncharacterized
SB0247CVR_bridger_k30_16007	11.61	12.91	NonToxin	Uncharacterized	Uncharacterized
SB0247CVR_bridger_k30_16020	8.96	5.32	NonToxin	NonToxin	GBEX01000784|Crotalus_adamanteus COP9 signalosome complex subunit 7b
SB0247CVR_bridger_k30_1608	14.53	69.74	NonToxin	Uncharacterized	Uncharacterized
SB0247CVR_bridger_k30_1615	15.04	10.49	NonToxin	NonToxin	GBEX01002273|Crotalus_adamanteus tRNA (cytosine-5-)-methyltransferase NSUN2-like
SB0247CVR_bridger_k30_16174	8.26	6.15	NonToxin	Uncharacterized	Uncharacterized
SB0247CVR_bridger_k30_1621	43.02	56.95	NonToxin	Uncharacterized	Uncharacterized
SB0247CVR_bridger_k30_16215	8.04	14.64	NonToxin	NonToxin	GAAZ01002736|Crotalus_horridus Protein TSSC4-like protein
SB0247CVR_bridger_k30_1622	286.89	284.21	NonToxin	NonToxin	GBEX01000316|Crotalus_adamanteus ATP synthase subunit beta, mitochondrial-like
SB0247CVR_bridger_k30_16228	13.06	17.84	NonToxin	NonToxin	GBSH01000453|Boiga_irregularis putative protein C12orf45 -like protein
SB0247CVR_bridger_k30_16234	5.86	10.51	NonToxin	NonToxin	GBEX01000690|Crotalus_adamanteus Checkpoint protein
SB0247CVR_bridger_k30_1624	61.49	35.9	NonToxin	NonToxin	ENSNSUP00000006697,1|RCN3 RCN3 reticulocalbin 3 [Source:HGNC Symbol;Acc:HGNC:21145]
SB0247CVR_bridger_k30_16260	7.79	12.93	NonToxin	NonToxin	GBEX01000642|Crotalus_adamanteus CD81 protein
SB0247CVR_bridger_k30_16265	1.95	1.64	NonToxin	Uncharacterized	Uncharacterized
SB0247CVR_bridger_k30_16266	5.96	6.23	NonToxin	NonToxin	GBSH01001596|Boiga_irregularis to MGC84124 protein
SB0247CVR_bridger_k30_16276	10.44	12.84	NonToxin	NonToxin	GAAZ01001459|Crotalus_horridus Molybdopterin synthase catalytic subunit
SB0247CVR_bridger_k30_16277	7.34	10.33	NonToxin	NonToxin	ENSNSUP00000009882,1|SNX30 SNX30 sorting nexin family member 30 [Source:HGNC Symbol;Acc:HGNC:23685]
SB0247CVR_bridger_k30_16307	9.8	10.06	NonToxin	NonToxin	GAAZ01002605|Crotalus_horridus TIMELESS-interacting protein
SB0247CVR_bridger_k30_16317	11.57	8.93	NonToxin	NonToxin	GBEX01000504|Crotalus_adamanteus UPF0452 protein C7orf41 homolog
SB0247CVR_bridger_k30_16332	6.85	10.69	NonToxin	Uncharacterized	Uncharacterized
SB0247CVR_bridger_k30_16341	11.19	9.97	NonToxin	NonToxin	ENSNSUP00000023325,1|MRPL49 MRPL49 mitochondrial ribosomal protein L49 [Source:HGNC Symbol;Acc:HGNC:1176]
SB0247CVR_bridger_k30_16358	7.78	9.79	NonToxin	NonToxin	ENSPVIG00000002527|ENSPVIP00000002985|TATDN3 TATDN3 TatD DNase domain containing 3 [Source:NCBI gene;Acc:110079497]
SB0247CVR_bridger_k30_16386	9.31	7.32	NonToxin	NonToxin	GBSI01001354|Hypsiglena_sp,_JMG-2014 methylosome protein 50
SB0247CVR_bridger_k30_16391	7.26	6.26	NonToxin	NonToxin	GAAZ01001162|Crotalus_horridus Integrator complex subunit 11-like protein
SB0247CVR_bridger_k30_16407	7.33	14.32	NonToxin	NonToxin	GBSH01002557|Boiga_irregularis pre-mRNA-splicing factor SLU7-like
SB0247CVR_bridger_k30_16464	5.14	5.14	NonToxin	NonToxin	ENSPVIG00000019575|ENSPVIP00000026214|SH3D19 SH3D19 SH3 domain containing 19 [Source:NCBI gene;Acc:110072757]
SB0247CVR_bridger_k30_16472	5.11	6.45	NonToxin	Uncharacterized	Uncharacterized
SB0247CVR_bridger_k30_16473	9.16	6.47	NonToxin	NonToxin	GDAY02002515|Agkistrodon_contortrix_contortrix Testin
SB0247CVR_bridger_k30_16482	5.95	7.55	NonToxin	NonToxin	glutamyl-tRNA synthetase 2, mitochondrial
SB0247CVR_bridger_k30_16483	7.12	11.13	NonToxin	NonToxin	poly (ADP-ribose) polymerase family, member 16
SB0247CVR_bridger_k30_16485	8.64	10.81	NonToxin	NonToxin	GAAZ01002978|Crotalus_horridus YTH domain family protein 2-like protein
SB0247CVR_bridger_k30_1653	15.32	14.04	NonToxin	NonToxin	ENSNSUP00000024775,1|SHMT1 SHMT1 serine hydroxymethyltransferase 1 [Source:HGNC Symbol;Acc:HGNC:10850]
SB0247CVR_bridger_k30_16550	8.69	8.8	NonToxin	NonToxin	GDAY02000943|Agkistrodon_contortrix_contortrix poly(A) RNA polymerase GLD2
SB0247CVR_bridger_k30_16558	6.6	3.01	NonToxin	NonToxin	|ENSACAG00000005686|ENSACAP00000005567| DEP domain-containing mTOR-interacting protein [Source:NCBI gene;Acc:100555207]
SB0247CVR_bridger_k30_16572	8.56	9.6	NonToxin	NonToxin	ENSACAG00000014841|ENSACAP00000014590|DYNLT3 DYNLT3 dynein light chain Tctex-type 3 [Source:NCBI gene;Acc:100559781]
SB0247CVR_bridger_k30_16574	6.01	7.45	NonToxin	NonToxin	ENSNSUP00000009304,1|B9D2 B9D2 B9 domain containing 2 [Source:HGNC Symbol;Acc:HGNC:28636]
SB0247CVR_bridger_k30_1659	213.14	210.8	NonToxin	Uncharacterized	Uncharacterized
SB0247CVR_bridger_k30_16595	8.05	11.24	NonToxin	NonToxin	GDAY02002837|Agkistrodon_contortrix_contortrix e3 ubiquitin-protein ligase RNF12-A-like
SB0247CVR_bridger_k30_16615	9.66	19.13	NonToxin	NonToxin	|ENSACAG00000005676|ENSACAP00000005573| di-N-acetylchitobiase [Source:NCBI gene;Acc:100553385]
SB0247CVR_bridger_k30_16631	8.44	6.21	NonToxin	NonToxin	GBSI01000587|Hypsiglena_sp,_JMG-2014 COMM domain-containing protein 4
SB0247CVR_bridger_k30_16634	8.53	10.06	NonToxin	NonToxin	GAAZ01001247|Crotalus_horridus RNA polymerase-associated protein LEO1-like
SB0247CVR_bridger_k30_16649	8.49	6.7	NonToxin	NonToxin	GAAZ01001312|Crotalus_horridus l-threonine 3-dehydrogenase, mitochondrial-like
SB0247CVR_bridger_k30_16681	9.17	4.47	NonToxin	Uncharacterized	Uncharacterized
SB0247CVR_bridger_k30_1672	14.59	17.32	NonToxin	NonToxin	GBEX01000433|Crotalus_adamanteus putative peptide chain release factor C12orf65
SB0247CVR_bridger_k30_1677	21.84	22.06	NonToxin	NonToxin	GDAY02000999|Agkistrodon_contortrix_contortrix Grainyhead-like protein 1
SB0247CVR_bridger_k30_16770	7.83	5.29	NonToxin	NonToxin	GAAZ01001460|Crotalus_horridus Monocarboxylate transporter 10
SB0247CVR_bridger_k30_1678	265.42	19.94	NonToxin	NonToxin	GDAY02002735|Agkistrodon_contortrix_contortrix Troponin C, skeletal muscle
SB0247CVR_bridger_k30_16783	7.84	5.83	NonToxin	NonToxin	ENSACAG00000002302|ENSACAP00000002227|GALNT12 GALNT12 polypeptide N-acetylgalactosaminyltransferase 12 [Source:NCBI gene;Acc:100561039]
SB0247CVR_bridger_k30_16875	6.68	8.04	NonToxin	NonToxin	GBEX01001956|Crotalus_adamanteus mesoderm-specific transcript-like protein
SB0247CVR_bridger_k30_16914	6.1	30.43	NonToxin	NonToxin	beaded filament structural protein 1, filensin
SB0247CVR_bridger_k30_16971	4.26	3.6	NonToxin	NonToxin	GAAZ01002061|Crotalus_horridus u3 small nucleolar ribonucleoprotein IMP3-like
SB0247CVR_bridger_k30_16972	6.23	6.67	NonToxin	NonToxin	ENSPVIG00000003239|ENSPVIP00000003984|CDC40 CDC40 cell division cycle 40 [Source:NCBI gene;Acc:110083135]
SB0247CVR_bridger_k30_16998	9.19	10.98	NonToxin	NonToxin	GBEX01002035|Crotalus_adamanteus monocarboxylate transporter 1
SB0247CVR_bridger_k30_17013	8.78	11.12	NonToxin	Uncharacterized	Uncharacterized
SB0247CVR_bridger_k30_17027	9.23	9.05	NonToxin	NonToxin	ENSNSUP00000011629,1|SURF1 SURF1 SURF1 cytochrome c oxidase assembly factor [Source:HGNC Symbol;Acc:HGNC:11474]
SB0247CVR_bridger_k30_17054	147	168.82	NonToxin	Uncharacterized	Uncharacterized
SB0247CVR_bridger_k30_17091	10.11	7.19	NonToxin	NonToxin	GAAZ01002006|Crotalus_horridus Ras family, member G (rho G)
SB0247CVR_bridger_k30_17115	7.18	6.63	NonToxin	NonToxin	GDAY02002569|Agkistrodon_contortrix_contortrix Acyl-protein thioesterase 2
SB0247CVR_bridger_k30_17170	9.11	9.5	NonToxin	Uncharacterized	Uncharacterized
SB0247CVR_bridger_k30_17172	8.48	11.02	NonToxin	NonToxin	GDAY02000181|Agkistrodon_contortrix_contortrix apoe protein
SB0247CVR_bridger_k30_1718	40.69	20.68	NonToxin	Uncharacterized	Uncharacterized
SB0247CVR_bridger_k30_17248	6.41	3.71	NonToxin	NonToxin	GBEX01002720|Crotalus_adamanteus ras-related protein Rab-40C
SB0247CVR_bridger_k30_17302	4.94	15.87	NonToxin	NonToxin	GBEW01001071|Micrurus_fulvius Mitochondrial import inner membrane translocase
SB0247CVR_bridger_k30_17332	5.44	5.29	NonToxin	NonToxin	ENSNSUP00000015485,1|GALNT7 GALNT7 polypeptide N-acetylgalactosaminyltransferase 7 [Source:HGNC Symbol;Acc:HGNC:4129]
SB0247CVR_bridger_k30_17338	7.04	3.89	NonToxin	NonToxin	vesicle-associated membrane protein 7
SB0247CVR_bridger_k30_17344	5.17	7.71	NonToxin	NonToxin	GBEX01001701|Crotalus_adamanteus uncharacterized protein KIAA0513
SB0247CVR_bridger_k30_17375	8.22	9.98	NonToxin	NonToxin	GDAY02000815|Agkistrodon_contortrix_contortrix erlin-2-like protein
SB0247CVR_bridger_k30_1741	268.37	213.64	NonToxin	NonToxin	GBSH01001710|Boiga_irregularis myosin light polypeptide 6
SB0247CVR_bridger_k30_17413	5.17	2.71	NonToxin	NonToxin	GBEX01003639|Crotalus_adamanteus TNF receptor-associated factor 2 isoform 2
SB0247CVR_bridger_k30_1744	7.26	2.23	NonToxin	Uncharacterized	Uncharacterized
SB0247CVR_bridger_k30_17446	6.93	8.49	NonToxin	NonToxin	GDAY02001910|Agkistrodon_contortrix_contortrix Phosphatidylserine synthase 1-like protein
SB0247CVR_bridger_k30_17524	7.18	9.67	NonToxin	NonToxin	Yae1 domain containing 1
SB0247CVR_bridger_k30_17550	2.37	1.75	NonToxin	NonToxin	chromosome 18 open reading frame 21
SB0247CVR_bridger_k30_17566	3.43	3.69	NonToxin	NonToxin	TELO2 interacting protein 1
SB0247CVR_bridger_k30_17581	3.51	7.86	NonToxin	NonToxin	GBEX01001394|Crotalus_adamanteus glycophorin C
SB0247CVR_bridger_k30_1762	29.98	27.02	NonToxin	NonToxin	GDAY02000324|Agkistrodon_contortrix_contortrix UPF0414 transmembrane C20orf30-like protein
SB0247CVR_bridger_k30_1765	59.01	67.21	NonToxin	NonToxin	GAAZ01002975|Crotalus_horridus Protein YIPF5-like protein
SB0247CVR_bridger_k30_17667	5.19	6.23	NonToxin	NonToxin	solute carrier family 25 (mitochondrial oxoadipate carrier), member 21
SB0247CVR_bridger_k30_17680	8.34	5.04	NonToxin	NonToxin	GAAZ01002260|Crotalus_horridus septin-2-like protein
SB0247CVR_bridger_k30_17686	7.25	6.87	NonToxin	NonToxin	GAAZ01000713|Crotalus_horridus DnaJ subfamily B member 12-like protein
SB0247CVR_bridger_k30_17696	5.97	5.94	NonToxin	NonToxin	ENSNSUP00000019764,1|FERMT2 FERMT2 fermitin family member 2 [Source:HGNC Symbol;Acc:HGNC:15767]
SB0247CVR_bridger_k30_178	40.52	57.18	NonToxin	Uncharacterized	Uncharacterized
SB0247CVR_bridger_k30_17800	3.98	4.44	NonToxin	Uncharacterized	Uncharacterized
SB0247CVR_bridger_k30_17822	7.04	5.84	NonToxin	NonToxin	GBSH01000468|Boiga_irregularis putative protein C19orf12
SB0247CVR_bridger_k30_17869	4.94	6.9	NonToxin	NonToxin	GBSH01002053|Boiga_irregularis pentatricopeptide repeat-containing protein
SB0247CVR_bridger_k30_17870	3.71	3.67	NonToxin	NonToxin	|ENSPVIG00000015438|ENSPVIP00000020230| TUB like protein 2 [Source:NCBI gene;Acc:110078589]
SB0247CVR_bridger_k30_17899	6.58	7.76	NonToxin	NonToxin	GBEX01001857|Crotalus_adamanteus Leucine-rich repeat-containing protein 14
SB0247CVR_bridger_k30_17950	4.39	7.73	NonToxin	Uncharacterized	Uncharacterized
SB0247CVR_bridger_k30_1802	252.21	190.73	NonToxin	NonToxin	GAAZ01000134|Crotalus_horridus Alpha-enolase
SB0247CVR_bridger_k30_18044	4.86	2.7	NonToxin	NonToxin	Zinc finger, RING-type
SB0247CVR_bridger_k30_18065	5.05	5.03	NonToxin	NonToxin	GBEX01001781|Crotalus_adamanteus lethal(2) giant larvae protein 2-like
SB0247CVR_bridger_k30_18099	5.5	3.55	NonToxin	NonToxin	ENSNSUP00000004553,1|PPP2R3C PPP2R3C protein phosphatase 2 regulatory subunit B''gamma [Source:HGNC Symbol;Acc:HGNC:17485]
SB0247CVR_bridger_k30_18103	15.3	4.9	NonToxin	NonToxin	ENSNSUP00000026883,1|TIMM9 TIMM9 translocase of inner mitochondrial membrane 9 [Source:HGNC Symbol;Acc:HGNC:11819]
SB0247CVR_bridger_k30_1813	287.71	21.56	NonToxin	NonToxin	Q8AY75|CALGL_BOTIN Calglandulin OS=Bothrops insularis OX=8723 PE=2 SV=1
SB0247CVR_bridger_k30_18187	7.73	10.04	NonToxin	NonToxin	GBEX01001236|Crotalus_adamanteus Protein FAM54B-like protein
SB0247CVR_bridger_k30_18188	5.23	5.3	NonToxin	NonToxin	ENSNSUP00000003892,1|FBXO33 FBXO33 F-box protein 33 [Source:HGNC Symbol;Acc:HGNC:19833]
SB0247CVR_bridger_k30_1819	8.49	3.9	NonToxin	NonToxin	ENSNSUP00000024351,1|TRUB2 TRUB2 TruB pseudouridine synthase family member 2 [Source:HGNC Symbol;Acc:HGNC:17170]
SB0247CVR_bridger_k30_182	21.24	19.25	NonToxin	Uncharacterized	Uncharacterized
SB0247CVR_bridger_k30_1821	116.8	108.68	NonToxin	NonToxin	GBEW01000179|Micrurus_fulvius Calmodulin
SB0247CVR_bridger_k30_18368	10.2	16.32	NonToxin	NonToxin	GBSI01000324|Hypsiglena_sp,_JMG-2014 cDNA sequence BC034664
SB0247CVR_bridger_k30_18416	5.51	6.47	NonToxin	NonToxin	GBEX01000821|Crotalus_adamanteus CTP synthase 1 isoform X1
SB0247CVR_bridger_k30_18523	6.09	5.05	NonToxin	NonToxin	GBEX01000731|Crotalus_adamanteus cleavage stimulation factor subunit 1-like
SB0247CVR_bridger_k30_18546	4.08	5.04	NonToxin	NonToxin	ENSPVIG00000008501|ENSPVIP00000010765|BAIAP2 BAIAP2 BAR/IMD domain containing adaptor protein 2 [Source:NCBI gene;Acc:110090028]
SB0247CVR_bridger_k30_18561	8.07	7.13	NonToxin	NonToxin	ENSNSUP00000007473,1
SB0247CVR_bridger_k30_18621	5.01	6.79	NonToxin	Uncharacterized	Uncharacterized
SB0247CVR_bridger_k30_18639	3.73	4.16	NonToxin	NonToxin	tetratricopeptide repeat domain 8
SB0247CVR_bridger_k30_1867	324.62	153.58	NonToxin	NonToxin	GAAZ01000623|Crotalus_horridus Cystatin-B-like protein
SB0247CVR_bridger_k30_187	16.88	55.77	NonToxin	Uncharacterized	Uncharacterized
SB0247CVR_bridger_k30_1879	186.13	152.71	NonToxin	NonToxin	GBEX01000326|Crotalus_adamanteus ATP synthase lipid-binding protein,
SB0247CVR_bridger_k30_1880	391.11	338.63	NonToxin	Uncharacterized	Uncharacterized
SB0247CVR_bridger_k30_18813	8.02	16.36	NonToxin	Uncharacterized	Uncharacterized
SB0247CVR_bridger_k30_18838	6.39	2.91	NonToxin	NonToxin	GBEX01001619|Crotalus_adamanteus Inactive hydroxysteroid dehydrogenase-like
SB0247CVR_bridger_k30_18850	5.76	5.71	NonToxin	NonToxin	ENSNSUP00000016665,1|HMOX1 HMOX1 heme oxygenase 1 [Source:HGNC Symbol;Acc:HGNC:5013]
SB0247CVR_bridger_k30_18851	6.65	11.15	NonToxin	NonToxin	ENSNSUP00000012962,1|C22orf39 C22orf39 chromosome 22 open reading frame 39 [Source:HGNC Symbol;Acc:HGNC:27012]
SB0247CVR_bridger_k30_18865	7.04	6.71	NonToxin	NonToxin	DNA fragmentation factor, 40kDa, beta polypeptide (caspase-activated DNase)
SB0247CVR_bridger_k30_1887	259.22	326.71	NonToxin	NonToxin	GDAY02000160|Agkistrodon_contortrix_contortrix Annexin A2-like protein
SB0247CVR_bridger_k30_1890	94.81	77.57	NonToxin	NonToxin	GDAY02000119|Agkistrodon_contortrix_contortrix Allograft inflammatory factor 1-like protein
SB0247CVR_bridger_k30_18912	5.14	5.58	NonToxin	NonToxin	GBEX01003211|Crotalus_adamanteus u6 snRNA-associated Sm-like protein LSm1-like
SB0247CVR_bridger_k30_1892	180.51	153.65	NonToxin	NonToxin	GDAY02000987|Agkistrodon_contortrix_contortrix hypothetical protein
SB0247CVR_bridger_k30_18929	4.73	4.03	NonToxin	Uncharacterized	Uncharacterized
SB0247CVR_bridger_k30_18930	7.13	6.57	NonToxin	NonToxin	ENSNSUP00000014873,1
SB0247CVR_bridger_k30_18957	5.16	6.05	NonToxin	NonToxin	zinc finger and BTB domain containing 7C
SB0247CVR_bridger_k30_19013	7.01	4.7	NonToxin	NonToxin	ENSNSUP00000013944,1
SB0247CVR_bridger_k30_19022	7.02	9.61	NonToxin	NonToxin	GBEX01004036|Crotalus_adamanteus YY1-associated factor 2 isoform 1
SB0247CVR_bridger_k30_1904	13.34	17.82	NonToxin	NonToxin	malonyl CoA:ACP acyltransferase (mitochondrial)
SB0247CVR_bridger_k30_19042	6.38	7.77	NonToxin	NonToxin	cell division cycle associated 8
SB0247CVR_bridger_k30_19084	4.97	8.05	NonToxin	NonToxin	GAAZ01002033|Crotalus_horridus retinoic acid-induced protein 3-like protein
SB0247CVR_bridger_k30_19105	5.09	4.61	NonToxin	NonToxin	ENSNSUP00000008628,1|DPH5 DPH5 diphthamide biosynthesis 5 [Source:HGNC Symbol;Acc:HGNC:24270]
SB0247CVR_bridger_k30_19160	5.86	8.53	NonToxin	NonToxin	GDAY02000216|Agkistrodon_contortrix_contortrix sodium/potassium-transporting ATPase subunit
SB0247CVR_bridger_k30_1922	177.97	545.2	NonToxin	NonToxin	GBEX01003017|Crotalus_adamanteus protein S100-A6
SB0247CVR_bridger_k30_1923	185.4	174.34	NonToxin	NonToxin	GBSI01001107|Hypsiglena_sp,_JMG-2014 heat shock 70kDa protein 8
SB0247CVR_bridger_k30_19294	4.58	2.04	NonToxin	NonToxin	GAAZ01001381|Crotalus_horridus Melanin-concentrating hormone receptor 1-like
SB0247CVR_bridger_k30_19307	4.74	4.76	NonToxin	NonToxin	GDAY02002305|Agkistrodon_contortrix_contortrix signal peptide protease
SB0247CVR_bridger_k30_19335	5.61	4.88	NonToxin	NonToxin	GAAZ01000030|Crotalus_horridus Putative N-acetyltransferase camello-like
SB0247CVR_bridger_k30_1936	21.98	16.33	NonToxin	NonToxin	ENSNSUP00000012129,1|ALDH4A1 ALDH4A1 aldehyde dehydrogenase 4 family member A1 [Source:HGNC Symbol;Acc:HGNC:406]
SB0247CVR_bridger_k30_19372	4.94	5.55	NonToxin	NonToxin	ENSACAG00000017316|ENSACAP00000022318|PTBP3 PTBP3 polypyrimidine tract binding protein 3 [Source:NCBI gene;Acc:100560502]
SB0247CVR_bridger_k30_19405	9.89	3.97	NonToxin	Uncharacterized	Uncharacterized
SB0247CVR_bridger_k30_19411	6.58	2.18	NonToxin	NonToxin	ENSNSUP00000006977,1
SB0247CVR_bridger_k30_19412	6.41	1.01	NonToxin	NonToxin	ENSNSUP00000022009,1|FBLN7 FBLN7 fibulin 7 [Source:HGNC Symbol;Acc:HGNC:26740]
SB0247CVR_bridger_k30_19431	4.95	3.78	NonToxin	NonToxin	ENSNSUP00000003113,1|DUSP23 DUSP23 dual specificity phosphatase 23 [Source:HGNC Symbol;Acc:HGNC:21480]
SB0247CVR_bridger_k30_19438	7.28	10.03	NonToxin	NonToxin	N-glycanase 1
SB0247CVR_bridger_k30_1944	222.97	231.75	NonToxin	NonToxin	GBEX01001770|Crotalus_adamanteus Lactate dehydrogenase B
SB0247CVR_bridger_k30_1945	211.48	474.02	NonToxin	NonToxin	GAAZ01000833|Crotalus_horridus 55 kDa erythrocyte membrane protein-like
SB0247CVR_bridger_k30_19462	5.73	7.64	NonToxin	NonToxin	GBEW01001232|Micrurus_fulvius WD repeat domain phosphoinositide-interacting
SB0247CVR_bridger_k30_19470	3.63	3.61	NonToxin	NonToxin	ENSACAG00000015025|ENSACAP00000014822|SLC38A9 SLC38A9 solute carrier family 38 member 9 [Source:NCBI gene;Acc:100556685]
SB0247CVR_bridger_k30_19495	3.87	4.62	NonToxin	NonToxin	family with sequence similarity 199, X-linked
SB0247CVR_bridger_k30_19529	6.57	7.74	NonToxin	NonToxin	GBEX01003812|Crotalus_adamanteus ubiquitin-like 4A
SB0247CVR_bridger_k30_1953	178.62	25.92	NonToxin	Uncharacterized	Uncharacterized
SB0247CVR_bridger_k30_19588	6.36	7.68	NonToxin	NonToxin	ring finger protein 114
SB0247CVR_bridger_k30_19594	5.87	8.71	NonToxin	Uncharacterized	Uncharacterized
SB0247CVR_bridger_k30_1960	31.28	27.28	NonToxin	NonToxin	GAAZ01000526|Crotalus_horridus Cleavage and polyadenylation specificity factor
SB0247CVR_bridger_k30_19657	4.85	6.82	NonToxin	Uncharacterized	Uncharacterized
SB0247CVR_bridger_k30_19674	6.11	6.09	NonToxin	NonToxin	ENSNSUP00000024477,1|PIGH PIGH phosphatidylinositol glycan anchor biosynthesis class H [Source:HGNC Symbol;Acc:HGNC:8964]
SB0247CVR_bridger_k30_19704	3.91	5.81	NonToxin	Uncharacterized	Uncharacterized
SB0247CVR_bridger_k30_19712	5.15	2.75	NonToxin	Uncharacterized	Uncharacterized
SB0247CVR_bridger_k30_19725	6.19	4.42	NonToxin	NonToxin	methyltransferase like 4
SB0247CVR_bridger_k30_19745	4.44	5.4	NonToxin	NonToxin	|ENSPVIG00000017303|ENSPVIP00000022922| bactericidal permeability-increasing protein-like [Source:NCBI gene;Acc:110088946]
SB0247CVR_bridger_k30_1980	129.05	112.17	NonToxin	NonToxin	beaded filament structural protein 1, filensin
SB0247CVR_bridger_k30_19809	6.11	5.16	NonToxin	NonToxin	ENSNSUP00000008198,1
SB0247CVR_bridger_k30_19869	2.18	4.18	NonToxin	Uncharacterized	Uncharacterized
SB0247CVR_bridger_k30_19876	5	9.8	NonToxin	NonToxin	|ENSACAG00000013166|ENSACAP00000012937| ISY1 splicing factor homolog [Source:NCBI gene;Acc:100558005]
SB0247CVR_bridger_k30_19879	5.81	6.08	NonToxin	NonToxin	GAAZ01001225|Crotalus_horridus Kynurenine--oxoglutarate transaminase 3-like
SB0247CVR_bridger_k30_19881	3.99	1.09	NonToxin	NonToxin	GAAZ01000944|Crotalus_horridus glycoprotein-N-acetylgalactosamine
SB0247CVR_bridger_k30_19904	4.57	3.67	NonToxin	NonToxin	ENSPVIG00000024895|ENSPVIP00000034073|GAPDHS GAPDHS glyceraldehyde-3-phosphate dehydrogenase, spermatogenic [Source:NCBI gene;Acc:110089088]
SB0247CVR_bridger_k30_1993	172.15	163.41	NonToxin	NonToxin	GBEX01001143|Crotalus_adamanteus transitional endoplasmic reticulum ATPase
SB0247CVR_bridger_k30_20009	2.42	2.8	NonToxin	NonToxin	ankyrin repeat and sterile alpha motif domain containing 3
SB0247CVR_bridger_k30_20017	5.47	6.93	NonToxin	Uncharacterized	Uncharacterized
SB0247CVR_bridger_k30_2009	114.25	136.32	NonToxin	NonToxin	GBEX01003013|Crotalus_adamanteus Protein S100-A11
SB0247CVR_bridger_k30_2012	21.88	19.77	NonToxin	NonToxin	neutrophil cytosolic factor 1
SB0247CVR_bridger_k30_20129	3.71	4.54	NonToxin	NonToxin	disrupted in renal carcinoma 2
SB0247CVR_bridger_k30_20140	3.37	2.08	NonToxin	NonToxin	|ENSACAG00000011900|ENSACAP00000011647| methenyltetrahydrofolate synthetase [Source:NCBI gene;Acc:100554444]
SB0247CVR_bridger_k30_2020	5.86	16.42	NonToxin	Uncharacterized	Uncharacterized
SB0247CVR_bridger_k30_20201	5.23	1.96	NonToxin	NonToxin	|ENSPVIG00000013985|ENSPVIP00000018292| DENN domain containing 10 [Source:NCBI gene;Acc:110075322]
SB0247CVR_bridger_k30_2027	5.29	1.9	NonToxin	Uncharacterized	Uncharacterized
SB0247CVR_bridger_k30_20276	7.66	3.8	NonToxin	Uncharacterized	Uncharacterized
SB0247CVR_bridger_k30_20280	6.41	9.49	NonToxin	Uncharacterized	Uncharacterized
SB0247CVR_bridger_k30_20345	8.29	4.76	NonToxin	Uncharacterized	Uncharacterized
SB0247CVR_bridger_k30_20358	5.01	5.16	NonToxin	NonToxin	ENSPVIG00000020666|ENSPVIP00000027833|C20orf27 C20orf27 chromosome unknown C20orf27 homolog [Source:NCBI gene;Acc:110079841]
SB0247CVR_bridger_k30_20391	6	4.72	NonToxin	Uncharacterized	Uncharacterized
SB0247CVR_bridger_k30_2040	274.94	197.2	NonToxin	Uncharacterized	Uncharacterized
SB0247CVR_bridger_k30_20446	5.01	4.48	NonToxin	NonToxin	ENSNSUP00000021308,1|TNFAIP8L1 TNFAIP8L1 TNF alpha induced protein 8 like 1 [Source:HGNC Symbol;Acc:HGNC:28279]
SB0247CVR_bridger_k30_2056	168.39	166.51	NonToxin	NonToxin	GBEX01000971|Crotalus_adamanteus protein DJ-1-like
SB0247CVR_bridger_k30_2060	183.79	223.86	NonToxin	Uncharacterized	Uncharacterized
SB0247CVR_bridger_k30_20616	2.92	2.87	NonToxin	Uncharacterized	Uncharacterized
SB0247CVR_bridger_k30_20636	3.2	4.34	NonToxin	NonToxin	ENSACAG00000007021|ENSACAP00000006961|CSAD CSAD cysteine sulfinic acid decarboxylase [Source:NCBI gene;Acc:100555254]
SB0247CVR_bridger_k30_2066	125.26	30.48	NonToxin	NonToxin	GBEX01000174|Crotalus_adamanteus Alpha globin
SB0247CVR_bridger_k30_20733	3.33	2.71	NonToxin	NonToxin	GBEX01003382|Crotalus_adamanteus TBC1 domain family member 20
SB0247CVR_bridger_k30_20779	3.25	3.3	NonToxin	NonToxin	regulating synaptic membrane exocytosis 4
SB0247CVR_bridger_k30_20866	5.49	3.36	NonToxin	NonToxin	BCL2/adenovirus E1B 19kDa interacting protein 2
SB0247CVR_bridger_k30_2088	21.67	21.77	NonToxin	NonToxin	GBEW01000225|Micrurus_fulvius Cleavage and polyadenylation specificity factor
SB0247CVR_bridger_k30_20882	2.88	6.08	NonToxin	NonToxin	GBEX01001739|Crotalus_adamanteus Krueppel-like factor 2-like
SB0247CVR_bridger_k30_20942	3.29	3.74	NonToxin	Uncharacterized	Uncharacterized
SB0247CVR_bridger_k30_20953	4.67	8.18	NonToxin	Uncharacterized	Uncharacterized
SB0247CVR_bridger_k30_20965	4.02	3.33	NonToxin	NonToxin	ENSACAG00000015225|ENSACAP00000014949|C3orf38 C3orf38 chromosome 3 open reading frame, human C3orf38 [Source:NCBI gene;Acc:100567322]
SB0247CVR_bridger_k30_20994	3.09	6.48	NonToxin	NonToxin	ENSNSUP00000017463,1|NENF NENF neudesin neurotrophic factor [Source:HGNC Symbol;Acc:HGNC:30384]
SB0247CVR_bridger_k30_2100	214.1	198.44	NonToxin	NonToxin	GDAY02001977|Agkistrodon_contortrix_contortrix hypothetical protein
SB0247CVR_bridger_k30_2107	133.91	233.93	NonToxin	NonToxin	GAAZ01001572|Crotalus_horridus Sodium/potassium-transporting ATPase subunit
SB0247CVR_bridger_k30_21070	3.76	8.13	NonToxin	NonToxin	inositol hexakisphosphate kinase 1
SB0247CVR_bridger_k30_2108	1.61	3.13	NonToxin	NonToxin	P-type ATPase
SB0247CVR_bridger_k30_21173	5.23	4.71	NonToxin	NonToxin	GBEX01002848|Crotalus_adamanteus RING1 and YY1-binding protein-like
SB0247CVR_bridger_k30_21206	2.66	4.5	NonToxin	NonToxin	PHD finger protein 6
SB0247CVR_bridger_k30_2127	14.78	13.58	NonToxin	NonToxin	GAAZ01002950|Crotalus_horridus katanin p80 WD40-containing subunit B1-like
SB0247CVR_bridger_k30_2128	141.19	151.46	NonToxin	NonToxin	GBEX01003966|Crotalus_adamanteus v-type proton ATPase 16 kDa proteolipid subunit
SB0247CVR_bridger_k30_21385	2.46	5.33	NonToxin	NonToxin	serine/threonine kinase 40
SB0247CVR_bridger_k30_2140	101.67	99.3	NonToxin	NonToxin	GBEX01002840|Crotalus_adamanteus RING finger protein 10
SB0247CVR_bridger_k30_21455	4.86	5.26	NonToxin	NonToxin	fem-1 homolog b (C, elegans)
SB0247CVR_bridger_k30_21527	5.05	4.07	NonToxin	Uncharacterized	Uncharacterized
SB0247CVR_bridger_k30_21706	3.96	10.96	NonToxin	Uncharacterized	Uncharacterized
SB0247CVR_bridger_k30_21717	4.23	5.38	NonToxin	NonToxin	ENSACAG00000015092|ENSACAP00000014831|AP4S1 AP4S1 adaptor related protein complex 4 subunit sigma 1 [Source:NCBI gene;Acc:100554474]
SB0247CVR_bridger_k30_2174	146.03	166.36	NonToxin	NonToxin	GBSI01001117|Hypsiglena_sp,_JMG-2014 Heat shock cognate protein HSP 90-beta-like
SB0247CVR_bridger_k30_2178	126	133.43	NonToxin	Uncharacterized	Uncharacterized
SB0247CVR_bridger_k30_21791	3.06	3.7	NonToxin	NonToxin	ENSPVIG00000016184|ENSPVIP00000021314|PABPC4 PABPC4 peptidyl-prolyl cis-trans isomerase E [Source:NCBI gene;Acc:110082739]
SB0247CVR_bridger_k30_2195	45.5	53.75	NonToxin	NonToxin	|ENSACAG00000006333|ENSACAP00000006195| NOP16 nucleolar protein [Source:NCBI gene;Acc:100554387]
SB0247CVR_bridger_k30_21952	1.74	1.88	NonToxin	Uncharacterized	Uncharacterized
SB0247CVR_bridger_k30_2196	5.09	5.86	NonToxin	NonToxin	ENSACAG00000006506|ENSACAP00000006503|VIPR1 VIPR1 vasoactive intestinal polypeptide receptor [Source:NCBI gene;Acc:100564326]
SB0247CVR_bridger_k30_21997	3.9	4.85	NonToxin	NonToxin	ENSNSUP00000020597,1
SB0247CVR_bridger_k30_22020	4.47	2.39	NonToxin	Uncharacterized	Uncharacterized
SB0247CVR_bridger_k30_22021	1.61	2.15	NonToxin	Uncharacterized	Uncharacterized
SB0247CVR_bridger_k30_22139	4.64	2.8	NonToxin	Uncharacterized	Uncharacterized
SB0247CVR_bridger_k30_22177	4	4.59	NonToxin	Uncharacterized	Uncharacterized
SB0247CVR_bridger_k30_22219	3.56	1.38	NonToxin	NonToxin	abhydrolase domain containing 11
SB0247CVR_bridger_k30_2222	10.31	8.38	NonToxin	NonToxin	GBEW01001044|Micrurus_fulvius LIM domain transcription factor LMO4-like
SB0247CVR_bridger_k30_22233	4.94	4.24	NonToxin	Uncharacterized	Uncharacterized
SB0247CVR_bridger_k30_2225	150.02	154.77	NonToxin	NonToxin	solute carrier family 30 (zinc transporter), member 6
SB0247CVR_bridger_k30_22322	2.51	5.44	NonToxin	Uncharacterized	Uncharacterized
SB0247CVR_bridger_k30_2234	18.54	21.35	NonToxin	NonToxin	GBEX01001899|Crotalus_adamanteus major facilitator superfamily domain-containing
SB0247CVR_bridger_k30_22347	3.35	4.43	NonToxin	NonToxin	GDAY02000322|Agkistrodon_contortrix_contortrix putative C1orf172-like protein
SB0247CVR_bridger_k30_22407	4.71	5.57	NonToxin	NonToxin	GBEX01000428|Crotalus_adamanteus ester hydrolase C11orf54 homolog
SB0247CVR_bridger_k30_2242	14.01	14.48	NonToxin	NonToxin	MRG/MORF4L binding protein
SB0247CVR_bridger_k30_22488	5.4	13.27	NonToxin	NonToxin	ENSPVIG00000014931|ENSPVIP00000019586|TCTEX1D1 TCTEX1D1 Tctex1 domain containing 1 [Source:NCBI gene;Acc:110085675]
SB0247CVR_bridger_k30_2251	159.89	126.44	NonToxin	NonToxin	GAAZ01001180|Crotalus_horridus Isocitrate dehydrogenase (NADP) cytoplasmic-like
SB0247CVR_bridger_k30_2254	64.84	134.1	NonToxin	NonToxin	GAAZ01001584|Crotalus_horridus Protein NDRG2-like protein
SB0247CVR_bridger_k30_22548	4.9	4.19	NonToxin	NonToxin	protein phosphatase, Mg2+/Mn2+ dependent, 1G
SB0247CVR_bridger_k30_22565	2.14	3.56	NonToxin	Uncharacterized	Uncharacterized
SB0247CVR_bridger_k30_2267	126.7	60.13	NonToxin	NonToxin	GAAZ01000124|Crotalus_horridus Fructose-bisphosphate aldolase A-like protein
SB0247CVR_bridger_k30_2270	163.13	193.63	NonToxin	Uncharacterized	Uncharacterized
SB0247CVR_bridger_k30_2272	121.92	131.1	NonToxin	NonToxin	GDAY02001079|Agkistrodon_contortrix_contortrix Class A basic helix-loop-helix protein 15-like
SB0247CVR_bridger_k30_22768	3.09	2.79	NonToxin	NonToxin	GBEX01000719|Crotalus_adamanteus claudin-12
SB0247CVR_bridger_k30_22822	2.37	2.59	NonToxin	NonToxin	serine/threonine kinase 40
SB0247CVR_bridger_k30_22846	4.01	3.55	NonToxin	Uncharacterized	Uncharacterized
SB0247CVR_bridger_k30_22913	4.8	11.14	NonToxin	NonToxin	GDAY02002176|Agkistrodon_contortrix_contortrix ryncolin-4
SB0247CVR_bridger_k30_2295	121.73	168.91	NonToxin	NonToxin	GBSH01002624|Boiga_irregularis stearoyl-CoA desaturase-1
SB0247CVR_bridger_k30_22953	2.56	1.59	NonToxin	NonToxin	solute carrier family 25, member 46
SB0247CVR_bridger_k30_22958	1.16	1.83	NonToxin	Uncharacterized	Uncharacterized
SB0247CVR_bridger_k30_22985	3.33	3.51	NonToxin	NonToxin	fem-1 homolog b (C, elegans)
SB0247CVR_bridger_k30_2302	46.77	42.25	NonToxin	NonToxin	GAAZ01002922|Crotalus_horridus Vitamin K epoxide reductase complex, subunit 1
SB0247CVR_bridger_k30_23099	3.15	2.52	NonToxin	NonToxin	GAAZ01000213|Crotalus_horridus ARP1 actin-related protein 1A
SB0247CVR_bridger_k30_2316	11.54	10.71	NonToxin	NonToxin	GAAZ01002965|Crotalus_horridus WW domain-binding protein 2-like protein
SB0247CVR_bridger_k30_23163	2.21	4.48	NonToxin	NonToxin	GBSH01001997|Boiga_irregularis Plastin-1
SB0247CVR_bridger_k30_23307	5.56	2.32	NonToxin	Uncharacterized	Uncharacterized
SB0247CVR_bridger_k30_23355	2.39	2.86	NonToxin	NonToxin	Zinc finger, C2H2
SB0247CVR_bridger_k30_23375	3.63	1.8	NonToxin	Uncharacterized	Uncharacterized
SB0247CVR_bridger_k30_23382	3.17	4.22	NonToxin	NonToxin	aprataxin
SB0247CVR_bridger_k30_23399	2.18	3.25	NonToxin	Uncharacterized	Uncharacterized
SB0247CVR_bridger_k30_2345	132.32	138.77	NonToxin	NonToxin	GBEX01000722|Crotalus_adamanteus Claudin-7
SB0247CVR_bridger_k30_23469	2.85	1.63	NonToxin	NonToxin	ENSNSUP00000025722,1|WWTR1 WWTR1 WW domain containing transcription regulator 1 [Source:HGNC Symbol;Acc:HGNC:24042]
SB0247CVR_bridger_k30_2350	124.21	148.62	NonToxin	Uncharacterized	Uncharacterized
SB0247CVR_bridger_k30_23510	3.12	2.33	NonToxin	Uncharacterized	Uncharacterized
SB0247CVR_bridger_k30_23598	2.34	1.95	NonToxin	NonToxin	lysosomal protein transmembrane 4 alpha
SB0247CVR_bridger_k30_23612	4.3	4.74	NonToxin	Uncharacterized	Uncharacterized
SB0247CVR_bridger_k30_23654	4.03	2.08	NonToxin	Uncharacterized	Uncharacterized
SB0247CVR_bridger_k30_23729	3.23	2.36	NonToxin	NonToxin	zinc finger and BTB domain containing 7C
SB0247CVR_bridger_k30_23788	3.88	5.13	NonToxin	Uncharacterized	Uncharacterized
SB0247CVR_bridger_k30_23805	2.48	2.46	NonToxin	Uncharacterized	Uncharacterized
SB0247CVR_bridger_k30_23927	3.85	4.3	NonToxin	Uncharacterized	Uncharacterized
SB0247CVR_bridger_k30_23979	5.26	4.95	NonToxin	Uncharacterized	Uncharacterized
SB0247CVR_bridger_k30_2398	6.24	6.47	NonToxin	NonToxin	eukaryotic translation initiation factor 4H
SB0247CVR_bridger_k30_23982	2.77	2.18	NonToxin	NonToxin	GBEX01003635|Crotalus_adamanteus transmembrane and ubiquitin-like
SB0247CVR_bridger_k30_23990	3.71	3.86	NonToxin	Uncharacterized	Uncharacterized
SB0247CVR_bridger_k30_23992	3.02	5.77	NonToxin	Uncharacterized	Uncharacterized
SB0247CVR_bridger_k30_2402	85.97	64.05	NonToxin	NonToxin	polymerase (RNA) II (DNA directed) polypeptide F
SB0247CVR_bridger_k30_24080	1.72	2.79	NonToxin	Uncharacterized	Uncharacterized
SB0247CVR_bridger_k30_24112	3.37	2.74	NonToxin	NonToxin	dynein, axonemal, assembly factor 5
SB0247CVR_bridger_k30_24124	2.61	1.95	NonToxin	Uncharacterized	Uncharacterized
SB0247CVR_bridger_k30_2423	194.07	167.78	NonToxin	NonToxin	GDAY02001857|Agkistrodon_contortrix_contortrix Profilin-1
SB0247CVR_bridger_k30_2424	180.6	107.4	NonToxin	NonToxin	GBEX01002639|Crotalus_adamanteus proteasome subunit beta type-7
SB0247CVR_bridger_k30_24261	1.8	5.07	NonToxin	Uncharacterized	Uncharacterized
SB0247CVR_bridger_k30_24275	2.97	2.6	NonToxin	NonToxin	dual specificity phosphatase 5
SB0247CVR_bridger_k30_2436	16.08	16.07	NonToxin	Uncharacterized	Uncharacterized
SB0247CVR_bridger_k30_24387	3.9	5.47	NonToxin	Uncharacterized	Uncharacterized
SB0247CVR_bridger_k30_2461	10.88	7.97	NonToxin	Uncharacterized	Uncharacterized
SB0247CVR_bridger_k30_24620	4.07	4.01	NonToxin	NonToxin	radial spoke head 1 homolog (Chlamydomonas)
SB0247CVR_bridger_k30_2468	15.27	13.43	NonToxin	Uncharacterized	Uncharacterized
SB0247CVR_bridger_k30_24721	2.22	1.89	NonToxin	Uncharacterized	Uncharacterized
SB0247CVR_bridger_k30_24784	3.08	1.9	NonToxin	NonToxin	ALX homeobox 1
SB0247CVR_bridger_k30_24851	4.05	3.27	NonToxin	Uncharacterized	Uncharacterized
SB0247CVR_bridger_k30_24916	2.7	2.43	NonToxin	Uncharacterized	Uncharacterized
SB0247CVR_bridger_k30_24973	1.58	1.05	NonToxin	Uncharacterized	Uncharacterized
SB0247CVR_bridger_k30_24978	3.41	6.15	NonToxin	NonToxin	zinc finger and BTB domain containing 7C
SB0247CVR_bridger_k30_25148	4.23	2.94	NonToxin	Uncharacterized	Uncharacterized
SB0247CVR_bridger_k30_25155	2.88	1.79	NonToxin	NonToxin	ENSNSUP00000017899,1|FABP3 FABP3 fatty acid binding protein 3 [Source:HGNC Symbol;Acc:HGNC:3557]
SB0247CVR_bridger_k30_2516	135.7	117.07	NonToxin	NonToxin	GAAZ01000545|Crotalus_horridus Coatomer subunit epsilon
SB0247CVR_bridger_k30_25179	4.09	1.42	NonToxin	NonToxin	polymerase (RNA) II (DNA directed) polypeptide C, 33kDa
SB0247CVR_bridger_k30_2529	61.78	60.98	NonToxin	NonToxin	GAAZ01000480|Crotalus_horridus Cell division control protein 42
SB0247CVR_bridger_k30_25502	3.49	6.42	NonToxin	Uncharacterized	Uncharacterized
SB0247CVR_bridger_k30_25511	2.42	2.95	NonToxin	Uncharacterized	Uncharacterized
SB0247CVR_bridger_k30_25554	2.74	1.7	NonToxin	NonToxin	WD40 repeat
SB0247CVR_bridger_k30_25751	1.72	1.78	NonToxin	Uncharacterized	Uncharacterized
SB0247CVR_bridger_k30_25791	3.14	8.37	NonToxin	Uncharacterized	Uncharacterized
SB0247CVR_bridger_k30_25795	1.47	3.13	NonToxin	NonToxin	GAAZ01000455|Crotalus_horridus Caveolin-2-like protein
SB0247CVR_bridger_k30_25838	3.06	3.29	NonToxin	Uncharacterized	Uncharacterized
SB0247CVR_bridger_k30_2585	20.24	17.3	NonToxin	NonToxin	GAAZ01001830|Crotalus_horridus Pyridine nucleotide-disulfide oxidoreductase
SB0247CVR_bridger_k30_25915	7.59	2.3	NonToxin	Uncharacterized	Uncharacterized
SB0247CVR_bridger_k30_25935	2.82	3.71	NonToxin	Uncharacterized	Uncharacterized
SB0247CVR_bridger_k30_25942	4.7	2.28	NonToxin	Uncharacterized	Uncharacterized
SB0247CVR_bridger_k30_26016	3.35	1.82	NonToxin	Uncharacterized	Uncharacterized
SB0247CVR_bridger_k30_26175	2.49	4.21	NonToxin	Uncharacterized	Uncharacterized
SB0247CVR_bridger_k30_26215	2.07	1.77	NonToxin	Uncharacterized	Uncharacterized
SB0247CVR_bridger_k30_26244	2.7	2.21	NonToxin	Uncharacterized	Uncharacterized
SB0247CVR_bridger_k30_26406	2.2	4.88	NonToxin	Uncharacterized	Uncharacterized
SB0247CVR_bridger_k30_26459	2.31	2.08	NonToxin	NonToxin	GBEX01002675|Crotalus_adamanteus PTB-containing, cubilin and LRP1-interacting
SB0247CVR_bridger_k30_26463	1.33	1.67	NonToxin	Uncharacterized	Uncharacterized
SB0247CVR_bridger_k30_2652	49.39	66.44	NonToxin	NonToxin	GDAY02000825|Agkistrodon_contortrix_contortrix ETS factor-like protein
SB0247CVR_bridger_k30_26522	1.97	1.69	NonToxin	Uncharacterized	Uncharacterized
SB0247CVR_bridger_k30_2656	133.93	131.54	NonToxin	NonToxin	GBEW01000745|Micrurus_fulvius Proteasome subunit alpha type-2
SB0247CVR_bridger_k30_2661	161.09	116.36	NonToxin	NonToxin	GBSH01002790|Boiga_irregularis eukaryotic initiation factor 4A-I
SB0247CVR_bridger_k30_26714	1.76	1.38	NonToxin	Uncharacterized	Uncharacterized
SB0247CVR_bridger_k30_26822	2.66	6.91	NonToxin	Uncharacterized	Uncharacterized
SB0247CVR_bridger_k30_2688	26.82	30	NonToxin	NonToxin	GAAZ01000481|Crotalus_horridus CDGSH iron-sulfur domain-containing protein 2
SB0247CVR_bridger_k30_2693	19.94	9.06	NonToxin	NonToxin	solute carrier family 7 (amino acid transporter light chain, L system), member 5
SB0247CVR_bridger_k30_2698	32.36	27.3	NonToxin	NonToxin	GAAZ01002108|Crotalus_horridus DNA-directed RNA polymerase II subunit RPB3-like
SB0247CVR_bridger_k30_27090	3	2.94	NonToxin	Uncharacterized	Uncharacterized
SB0247CVR_bridger_k30_27097	3.3	8.34	NonToxin	Uncharacterized	Uncharacterized
SB0247CVR_bridger_k30_2735	121.29	102.32	NonToxin	NonToxin	GAAZ01001913|Crotalus_horridus Proteasome subunit beta type-1-like protein
SB0247CVR_bridger_k30_27357	4.3	2.2	NonToxin	Uncharacterized	Uncharacterized
SB0247CVR_bridger_k30_27397	2.58	2.67	NonToxin	Uncharacterized	Uncharacterized
SB0247CVR_bridger_k30_2744	28.18	24.65	NonToxin	NonToxin	GBEX01001966|Crotalus_adamanteus Methylosome subunit pICln-like protein
SB0247CVR_bridger_k30_2761	154.08	171.88	NonToxin	NonToxin	GDAY02001140|Agkistrodon_contortrix_contortrix hypothetical protein
SB0247CVR_bridger_k30_27672	2.46	2.98	NonToxin	Uncharacterized	Uncharacterized
SB0247CVR_bridger_k30_2768	126.32	115.64	NonToxin	NonToxin	GBSH01002785|Boiga_irregularis eukaryotic translation initiation factor 3
SB0247CVR_bridger_k30_2769	96.11	125.18	NonToxin	NonToxin	DAZ associated protein 1
SB0247CVR_bridger_k30_27797	3.56	1.74	NonToxin	Uncharacterized	Uncharacterized
SB0247CVR_bridger_k30_278	38.38	37.9	NonToxin	Uncharacterized	Uncharacterized
SB0247CVR_bridger_k30_2780	26.05	15.72	NonToxin	NonToxin	GDAY02000713|Agkistrodon_contortrix_contortrix Dolichyldiphosphatase 1
SB0247CVR_bridger_k30_2781	31.1	30.33	NonToxin	Uncharacterized	Uncharacterized
SB0247CVR_bridger_k30_2783	7.47	10.14	NonToxin	NonToxin	GAAZ01002757|Crotalus_horridus tumor necrosis factor receptor type 1-associated
SB0247CVR_bridger_k30_2795	196.12	177.1	NonToxin	NonToxin	GAAZ01001331|Crotalus_horridus Macrophage migration inhibitory factor
SB0247CVR_bridger_k30_2797	83.16	110.21	NonToxin	NonToxin	GAAZ01000946|Crotalus_horridus Galectin-1-like protein
SB0247CVR_bridger_k30_28016	3.28	2.48	NonToxin	Uncharacterized	Uncharacterized
SB0247CVR_bridger_k30_28060	1.13	3.28	NonToxin	Uncharacterized	Uncharacterized
SB0247CVR_bridger_k30_28081	2.3	2.5	NonToxin	Uncharacterized	Uncharacterized
SB0247CVR_bridger_k30_28117	2.43	1.41	NonToxin	Uncharacterized	Uncharacterized
SB0247CVR_bridger_k30_2823	17.87	6.28	NonToxin	NonToxin	GDAY02000857|Agkistrodon_contortrix_contortrix protein FAM173A-like protein
SB0247CVR_bridger_k30_286	3.54	2.62	NonToxin	Uncharacterized	Uncharacterized
SB0247CVR_bridger_k30_2861	2.38	4.36	NonToxin	NonToxin	receptor-interacting serine-threonine kinase 2
SB0247CVR_bridger_k30_2863	126.43	119.34	NonToxin	NonToxin	GBSH01002115|Boiga_irregularis Proteasome subunit beta type-4
SB0247CVR_bridger_k30_28684	1.53	1.94	NonToxin	Uncharacterized	Uncharacterized
SB0247CVR_bridger_k30_2884	40.22	34.81	NonToxin	Uncharacterized	Uncharacterized
SB0247CVR_bridger_k30_2885	7.74	6.28	NonToxin	NonToxin	GBEX01003233|Crotalus_adamanteus Sodium-coupled neutral amino acid transporter 2
SB0247CVR_bridger_k30_2888	135.25	159.22	NonToxin	NonToxin	GDAY02000503|Agkistrodon_contortrix_contortrix Chloride intracellular channel protein 1-like
SB0247CVR_bridger_k30_2894	116.97	103.07	NonToxin	NonToxin	GDAY02002029|Agkistrodon_contortrix_contortrix Cytochrome b-c1 complex subunit Rieske,
SB0247CVR_bridger_k30_29124	1.28	1.41	NonToxin	Uncharacterized	Uncharacterized
SB0247CVR_bridger_k30_29125	1.82	1.07	NonToxin	Uncharacterized	Uncharacterized
SB0247CVR_bridger_k30_2916	131.32	132.37	NonToxin	NonToxin	ENSNSUP00000020541,1
SB0247CVR_bridger_k30_29197	2.61	3.13	NonToxin	Uncharacterized	Uncharacterized
SB0247CVR_bridger_k30_2923	66.5	73.51	NonToxin	Uncharacterized	Uncharacterized
SB0247CVR_bridger_k30_29257	1.67	3.95	NonToxin	Uncharacterized	Uncharacterized
SB0247CVR_bridger_k30_29295	1.96	2.18	NonToxin	NonToxin	progestin and adipoQ receptor family member VIII
SB0247CVR_bridger_k30_2930	108.88	91.15	NonToxin	NonToxin	GDAY02000236|Agkistrodon_contortrix_contortrix ATP synthase-coupling factor 6,
SB0247CVR_bridger_k30_29301	1.34	1.06	NonToxin	Uncharacterized	Uncharacterized
SB0247CVR_bridger_k30_2951	136.95	128.94	NonToxin	NonToxin	ENSNSUP00000003890,1|GSPT1 GSPT1 G1 to S phase transition 1 [Source:HGNC Symbol;Acc:HGNC:4621]
SB0247CVR_bridger_k30_29572	2.72	2.1	NonToxin	Uncharacterized	Uncharacterized
SB0247CVR_bridger_k30_29760	1.05	1.35	NonToxin	Uncharacterized	Uncharacterized
SB0247CVR_bridger_k30_29782	3.85	1.66	NonToxin	Uncharacterized	Uncharacterized
SB0247CVR_bridger_k30_29823	2.05	1.85	NonToxin	Uncharacterized	Uncharacterized
SB0247CVR_bridger_k30_29830	1.58	3.17	NonToxin	NonToxin	Rab9 effector protein with kelch motifs
SB0247CVR_bridger_k30_29941	3.9	3.22	NonToxin	Uncharacterized	Uncharacterized
SB0247CVR_bridger_k30_3002	43.87	34.65	NonToxin	NonToxin	GAAZ01002512|Crotalus_horridus Tetraspanin-31-like protein
SB0247CVR_bridger_k30_3004	25.85	27.94	NonToxin	NonToxin	GDAY02000542|Agkistrodon_contortrix_contortrix coronin, actin binding protein, 1C
SB0247CVR_bridger_k30_30047	1.82	1.48	NonToxin	Uncharacterized	Uncharacterized
SB0247CVR_bridger_k30_3011	24.51	23.31	NonToxin	NonToxin	GBEX01001028|Crotalus_adamanteus drebrin-like protein-like
SB0247CVR_bridger_k30_3023	84.16	72.19	NonToxin	NonToxin	collagen, type I, alpha 2
SB0247CVR_bridger_k30_30279	2.26	4.33	NonToxin	Uncharacterized	Uncharacterized
SB0247CVR_bridger_k30_304	168.41	162.35	NonToxin	NonToxin	GDAY02001814|Agkistrodon_contortrix_contortrix Polyadenylate-binding protein-interacting
SB0247CVR_bridger_k30_305	3134.16	2181.36	NonToxin	NonToxin	GAAZ01000757|Crotalus_horridus Elongation factor 1-alpha 1
SB0247CVR_bridger_k30_30503	2.66	3.6	NonToxin	Uncharacterized	Uncharacterized
SB0247CVR_bridger_k30_30750	2.02	4.48	NonToxin	Uncharacterized	Uncharacterized
SB0247CVR_bridger_k30_3081	20.72	24.71	NonToxin	NonToxin	GDAY02000727|Agkistrodon_contortrix_contortrix dynactin subunit 1 isoform 5
SB0247CVR_bridger_k30_3084	22.17	28.25	NonToxin	NonToxin	cullin 2
SB0247CVR_bridger_k30_3089	112.66	103.36	NonToxin	NonToxin	GDAY02000235|Agkistrodon_contortrix_contortrix ATP synthase subunit alpha, mitochondrial
SB0247CVR_bridger_k30_3101	125.83	234.58	NonToxin	NonToxin	GDAY02002593|Agkistrodon_contortrix_contortrix Eukaryotic translation initiation factor
SB0247CVR_bridger_k30_3128	139.54	145	NonToxin	NonToxin	GBEW01000986|Micrurus_fulvius Small nuclear ribonucleoprotein Sm D3
SB0247CVR_bridger_k30_3129	13.73	12.38	NonToxin	NonToxin	GBSH01000156|Boiga_irregularis abhydrolase domain-containing protein 4-like
SB0247CVR_bridger_k30_31351	1.79	1.32	NonToxin	NonToxin	SH3 domain
SB0247CVR_bridger_k30_3140	129.91	150.23	NonToxin	NonToxin	GAAZ01000270|Crotalus_horridus b-cell receptor-associated protein 31-like
SB0247CVR_bridger_k30_3160	17.27	23.36	NonToxin	NonToxin	GAAZ01000337|Crotalus_horridus Putative C19orf60-like protein
SB0247CVR_bridger_k30_3174	85.99	49.54	NonToxin	NonToxin	ENSNSUP00000017696,1|SLC3A2 SLC3A2 solute carrier family 3 member 2 [Source:HGNC Symbol;Acc:HGNC:11026]
SB0247CVR_bridger_k30_31792	1.38	1.85	NonToxin	Uncharacterized	Uncharacterized
SB0247CVR_bridger_k30_31830	1.26	2.12	NonToxin	Uncharacterized	Uncharacterized
SB0247CVR_bridger_k30_3186	99.74	85.6	NonToxin	NonToxin	ATP-binding cassette, sub-family F (GCN20), member 3
SB0247CVR_bridger_k30_32044	1.81	1.47	NonToxin	Uncharacterized	Uncharacterized
SB0247CVR_bridger_k30_32182	2.08	3.59	NonToxin	Uncharacterized	Uncharacterized
SB0247CVR_bridger_k30_32483	2.65	2.63	NonToxin	Uncharacterized	Uncharacterized
SB0247CVR_bridger_k30_32490	8.75	4.81	NonToxin	Uncharacterized	Uncharacterized
SB0247CVR_bridger_k30_3250	91.97	80.44	NonToxin	NonToxin	GBEW01000734|Micrurus_fulvius Profilin-2-like protein
SB0247CVR_bridger_k30_3266	109.93	102.53	NonToxin	NonToxin	GDAY02002002|Agkistrodon_contortrix_contortrix rho GDP-dissociation inhibitor 1-like protein
SB0247CVR_bridger_k30_32740	2.45	2.18	NonToxin	Uncharacterized	Uncharacterized
SB0247CVR_bridger_k30_32757	1.96	1.75	NonToxin	NonToxin	syntaxin 19
SB0247CVR_bridger_k30_32792	1.9	1.64	NonToxin	Uncharacterized	Uncharacterized
SB0247CVR_bridger_k30_32794	1.56	2.79	NonToxin	Uncharacterized	Uncharacterized
SB0247CVR_bridger_k30_32878	1.71	1.49	NonToxin	Uncharacterized	Uncharacterized
SB0247CVR_bridger_k30_3309	88.1	106.8	NonToxin	NonToxin	GAAZ01002398|Crotalus_horridus SPARC-like protein
SB0247CVR_bridger_k30_3316	10.55	27.22	NonToxin	Uncharacterized	Uncharacterized
SB0247CVR_bridger_k30_3330	30.74	33.3	NonToxin	NonToxin	GBEX01003129|Crotalus_adamanteus Serine/threonine-protein kinase MST4-like
SB0247CVR_bridger_k30_3334	4.63	5.35	NonToxin	NonToxin	thioredoxin 2
SB0247CVR_bridger_k30_3335	103.25	114.9	NonToxin	NonToxin	thioredoxin 2
SB0247CVR_bridger_k30_3360	102.68	108.42	NonToxin	NonToxin	GBSH01001779|Boiga_irregularis NEDD8
SB0247CVR_bridger_k30_33619	3.14	1.2	NonToxin	Uncharacterized	Uncharacterized
SB0247CVR_bridger_k30_33672	1.9	2.13	NonToxin	Uncharacterized	Uncharacterized
SB0247CVR_bridger_k30_33742	2.06	2.42	NonToxin	Uncharacterized	Uncharacterized
SB0247CVR_bridger_k30_3375	114.32	112.8	NonToxin	NonToxin	ENSNSUP00000026403,1|RARRES1 RARRES1 retinoic acid receptor responder 1 [Source:HGNC Symbol;Acc:HGNC:9867]
SB0247CVR_bridger_k30_3377	85.38	79.83	NonToxin	NonToxin	GBEX01003617|Crotalus_adamanteus Transmembrane protein 39A
SB0247CVR_bridger_k30_3387	88.96	93.91	NonToxin	NonToxin	GAAZ01000543|Crotalus_horridus Coatomer subunit beta'-like protein
SB0247CVR_bridger_k30_3408	15.18	19.76	NonToxin	NonToxin	SET domain containing 4
SB0247CVR_bridger_k30_341	9.63	9.82	NonToxin	NonToxin	GAAZ01000994|Crotalus_horridus GMP reductase 2-like protein
SB0247CVR_bridger_k30_3427	34.78	22.67	NonToxin	NonToxin	GBEX01003674|Crotalus_adamanteus Transferrin receptor protein 1-like protein
SB0247CVR_bridger_k30_34334	2.71	1.39	NonToxin	Uncharacterized	Uncharacterized
SB0247CVR_bridger_k30_34410	1.55	3.19	NonToxin	Uncharacterized	Uncharacterized
SB0247CVR_bridger_k30_34542	1.69	2.37	NonToxin	Uncharacterized	Uncharacterized
SB0247CVR_bridger_k30_3472	100.03	110.67	NonToxin	NonToxin	GAAZ01002027|Crotalus_horridus Protein RER1
SB0247CVR_bridger_k30_3484	98.2	110.97	NonToxin	NonToxin	GBEW01001148|Micrurus_fulvius Protein tyrosine phosphatase type IVA 1-like
SB0247CVR_bridger_k30_3486	57.07	85.32	NonToxin	NonToxin	ENSNSUP00000018960,1|SF3B1 SF3B1 splicing factor 3b subunit 1 [Source:HGNC Symbol;Acc:HGNC:10768]
SB0247CVR_bridger_k30_3513	167.19	137.69	NonToxin	Uncharacterized	Uncharacterized
SB0247CVR_bridger_k30_3517	59.09	59.45	NonToxin	NonToxin	collagen, type I, alpha 2
SB0247CVR_bridger_k30_3519	73.1	89.96	NonToxin	NonToxin	PBX/knotted 1 homeobox 1
SB0247CVR_bridger_k30_3526	23.97	35.04	NonToxin	NonToxin	GBEW01000179|Micrurus_fulvius Calmodulin
SB0247CVR_bridger_k30_3527	73.17	46.88	NonToxin	Uncharacterized	Uncharacterized
SB0247CVR_bridger_k30_3539	85.6	73.44	NonToxin	NonToxin	Fumarylacetoacetase
SB0247CVR_bridger_k30_3541	16.12	9.06	NonToxin	NonToxin	GAAZ01000149|Crotalus_horridus s-adenosylmethionine synthase isoform
SB0247CVR_bridger_k30_3545	67.94	81.56	NonToxin	NonToxin	GBEX01003086|Crotalus_adamanteus Sequestosome-1
SB0247CVR_bridger_k30_35557	5.92	2.1	NonToxin	Uncharacterized	Uncharacterized
SB0247CVR_bridger_k30_3569	98.71	12.04	NonToxin	NonToxin	alpha-kinase 2
SB0247CVR_bridger_k30_35979	1.26	2.44	NonToxin	NonToxin	Zinc finger, RING-type
SB0247CVR_bridger_k30_35996	1.64	1.24	NonToxin	Uncharacterized	Uncharacterized
SB0247CVR_bridger_k30_3607	89.89	68.65	NonToxin	NonToxin	GBEX01003392|Crotalus_adamanteus T-complex protein 1 subunit epsilon
SB0247CVR_bridger_k30_36136	1.31	2.65	NonToxin	Uncharacterized	Uncharacterized
SB0247CVR_bridger_k30_36276	2.24	3.1	NonToxin	NonToxin	LIM domain containing 2
SB0247CVR_bridger_k30_3638	21.56	31.94	NonToxin	Uncharacterized	Uncharacterized
SB0247CVR_bridger_k30_365	2725.15	2039.16	NonToxin	NonToxin	GAAZ01001730|Crotalus_horridus Protein disulfide-isomerase A3
SB0247CVR_bridger_k30_36577	3.45	2.72	NonToxin	Uncharacterized	Uncharacterized
SB0247CVR_bridger_k30_36832	1.63	2.84	NonToxin	Uncharacterized	Uncharacterized
SB0247CVR_bridger_k30_3711	35.54	43.41	NonToxin	NonToxin	GDAY02001437|Agkistrodon_contortrix_contortrix Dual specificity mitogen-activated protein
SB0247CVR_bridger_k30_3743	13.09	12.91	NonToxin	NonToxin	small integral membrane protein 8
SB0247CVR_bridger_k30_376	2105.74	1422.27	NonToxin	NonToxin	GBEX01001115|Crotalus_adamanteus endoplasmin
SB0247CVR_bridger_k30_37619	2.96	4.21	NonToxin	Uncharacterized	Uncharacterized
SB0247CVR_bridger_k30_3768	79.66	113.15	NonToxin	NonToxin	GAAZ01001344|Crotalus_horridus Malate dehydrogenase, cytoplasmic-like protein
SB0247CVR_bridger_k30_3773	8.92	12.39	NonToxin	NonToxin	GAAZ01002113|Crotalus_horridus DNA-directed RNA polymerase III subunit RPC3
SB0247CVR_bridger_k30_3776	5.34	21.58	NonToxin	Uncharacterized	Uncharacterized
SB0247CVR_bridger_k30_37767	1.77	2	NonToxin	Uncharacterized	Uncharacterized
SB0247CVR_bridger_k30_37795	1.79	1.26	NonToxin	Uncharacterized	Uncharacterized
SB0247CVR_bridger_k30_37799	1.45	3.18	NonToxin	Uncharacterized	Uncharacterized
SB0247CVR_bridger_k30_37808	1.77	2.16	NonToxin	Uncharacterized	Uncharacterized
SB0247CVR_bridger_k30_3795	54.39	72.85	NonToxin	NonToxin	GBEX01003015|Crotalus_adamanteus Protein S100-A1-like protein
SB0247CVR_bridger_k30_38289	1.3	2.19	NonToxin	NonToxin	sodium channel, voltage gated, type II beta subunit
SB0247CVR_bridger_k30_383	2142.56	3288.66	NonToxin	Uncharacterized	Uncharacterized
SB0247CVR_bridger_k30_3832	3.5	17.26	NonToxin	NonToxin	small nuclear ribonucleoprotein 35kDa (U11/U12)
SB0247CVR_bridger_k30_3840	43.39	83.18	NonToxin	NonToxin	GBEW01000799|Micrurus_fulvius ras-related C3 botulinum toxin substrate 1
SB0247CVR_bridger_k30_3872	12.42	14.07	NonToxin	Uncharacterized	Uncharacterized
SB0247CVR_bridger_k30_3873	37.62	65.71	NonToxin	NonToxin	GAAZ01000950|Crotalus_horridus Ganglioside GM2 activator
SB0247CVR_bridger_k30_3877	57.54	60.75	NonToxin	NonToxin	ENSNSUP00000000834,1
SB0247CVR_bridger_k30_38859	5.13	1.29	NonToxin	Uncharacterized	Uncharacterized
SB0247CVR_bridger_k30_390	59.77	56.71	NonToxin	NonToxin	GBSI01000418|Hypsiglena_sp,_JMG-2014 Calcium/calmodulin-dependent protein kinase type
SB0247CVR_bridger_k30_39095	4.08	1.05	NonToxin	Uncharacterized	Uncharacterized
SB0247CVR_bridger_k30_4026	60.51	76.97	NonToxin	NonToxin	GDAY02000049|Agkistrodon_contortrix_contortrix Actin-related protein 2/3 complex subunit 2-like
SB0247CVR_bridger_k30_4050	89.91	75	NonToxin	NonToxin	GAAZ01000915|Crotalus_horridus FGFR1 oncogene partner 2
SB0247CVR_bridger_k30_4054	6.75	8.9	NonToxin	NonToxin	ENSNSUP00000000509,1|SNN SNN stannin [Source:HGNC Symbol;Acc:HGNC:11149]
SB0247CVR_bridger_k30_406	4.56	5.95	NonToxin	NonToxin	GDAY02000223|Agkistrodon_contortrix_contortrix ATPase, Ca++ transporting, ubiquitous
SB0247CVR_bridger_k30_4066	69.31	91.34	NonToxin	NonToxin	GBEW01001038|Micrurus_fulvius Transcription factor BTF3 4-like protein
SB0247CVR_bridger_k30_4070	58.82	63.9	NonToxin	NonToxin	GAAZ01000412|Crotalus_horridus cAMP-dependent protein kinase catalytic subunit
SB0247CVR_bridger_k30_4076	78.62	70.28	NonToxin	Uncharacterized	Uncharacterized
SB0247CVR_bridger_k30_4077	13.11	10.9	NonToxin	Uncharacterized	Uncharacterized
SB0247CVR_bridger_k30_4082	43.32	36.05	NonToxin	NonToxin	GAAZ01001596|Crotalus_horridus Neutral alpha-glucosidase AB-like protein
SB0247CVR_bridger_k30_40842	2.79	3.33	NonToxin	Uncharacterized	Uncharacterized
SB0247CVR_bridger_k30_4103	86.68	90.57	NonToxin	NonToxin	proteasome (prosome, macropain) subunit, alpha type, 3
SB0247CVR_bridger_k30_4104	133.38	106.74	NonToxin	NonToxin	GDAY02000352|Agkistrodon_contortrix_contortrix UPF0562 C7orf55-like protein
SB0247CVR_bridger_k30_4105	88.53	132.85	NonToxin	NonToxin	GAAZ01001233|Crotalus_horridus Lactoylglutathione lyase-like protein
SB0247CVR_bridger_k30_4106	44.07	39.71	NonToxin	NonToxin	|ENSPVIG00000011374|ENSPVIP00000014735| B-cadherin-like [Source:NCBI gene;Acc:110076338]
SB0247CVR_bridger_k30_4111	70.72	64.21	NonToxin	NonToxin	GAAZ01000218|Crotalus_horridus Aspartate aminotransferase, mitochondrial-like
SB0247CVR_bridger_k30_4181	25.04	28.61	NonToxin	NonToxin	sirtuin 4
SB0247CVR_bridger_k30_4186	64.84	68.02	NonToxin	NonToxin	GDAY02001995|Agkistrodon_contortrix_contortrix retinol-binding protein 5-like protein
SB0247CVR_bridger_k30_41933	2.3	5.03	NonToxin	Uncharacterized	Uncharacterized
SB0247CVR_bridger_k30_42177	1.45	1.11	NonToxin	Uncharacterized	Uncharacterized
SB0247CVR_bridger_k30_4239	71.61	49.74	NonToxin	NonToxin	GBEX01000285|Crotalus_adamanteus Aspartate aminotransferase, cytoplasmic-like
SB0247CVR_bridger_k30_42436	6.35	1.56	NonToxin	Uncharacterized	Uncharacterized
SB0247CVR_bridger_k30_4249	82.2	91.96	NonToxin	NonToxin	GBEW01001153|Micrurus_fulvius Ubiquitin-like protein 5-like protein
SB0247CVR_bridger_k30_4253	94.07	83.73	NonToxin	NonToxin	GBEW01000144|Micrurus_fulvius putative protein BRICK1-like protein
SB0247CVR_bridger_k30_4270	58.28	133.4	NonToxin	Uncharacterized	Uncharacterized
SB0247CVR_bridger_k30_4274	73.62	74.6	NonToxin	NonToxin	GDAY02000912|Agkistrodon_contortrix_contortrix Glycerol-3-phosphate dehydrogenase 1-like
SB0247CVR_bridger_k30_4296	89.7	118.42	NonToxin	NonToxin	ENSNSUP00000008151,1|EMC7 EMC7 ER membrane protein complex subunit 7 [Source:HGNC Symbol;Acc:HGNC:24301]
SB0247CVR_bridger_k30_4302	82.17	78.05	NonToxin	NonToxin	GBEX01000084|Crotalus_adamanteus Acyl-CoA-binding protein-like protein
SB0247CVR_bridger_k30_4303	64.95	60.32	NonToxin	NonToxin	GDAY02000950|Agkistrodon_contortrix_contortrix Glucose-6-phosphate isomerase-like protein
SB0247CVR_bridger_k30_4304	46.69	34.34	NonToxin	NonToxin	GDAY02002357|Agkistrodon_contortrix_contortrix Sortilin-like protein
SB0247CVR_bridger_k30_4307	64.63	40.37	NonToxin	NonToxin	GBEX01002422|Crotalus_adamanteus phosphoenolpyruvate carboxykinase (GTP),
SB0247CVR_bridger_k30_4314	39.7	57.55	NonToxin	NonToxin	GBSH01001451|Boiga_irregularis long-chain-fatty-acid--CoA ligase ACSBG2-lik
SB0247CVR_bridger_k30_4324	61.9	56.79	NonToxin	NonToxin	GBEW01000644|Micrurus_fulvius alpha-soluble NSF attachment protein-like
SB0247CVR_bridger_k30_434	18.41	18.76	NonToxin	NonToxin	GDAY02002532|Agkistrodon_contortrix_contortrix tetratricopeptide repeat domain 39A-like
SB0247CVR_bridger_k30_435	8.17	7.64	NonToxin	NonToxin	ENSNSUP00000012852,1|NEU1 NEU1 neuraminidase 1 [Source:HGNC Symbol;Acc:HGNC:7758]
SB0247CVR_bridger_k30_43683	2.38	3.46	NonToxin	Uncharacterized	Uncharacterized
SB0247CVR_bridger_k30_4378	80.05	75.79	NonToxin	NonToxin	GBEW01000050|Micrurus_fulvius ADP-ribosylation factor 3
SB0247CVR_bridger_k30_4385	73.18	69.41	NonToxin	NonToxin	GAAZ01000954|Crotalus_horridus Guanine nucleotide-binding protein
SB0247CVR_bridger_k30_4416	52.93	38.93	NonToxin	NonToxin	GDAY02001531|Agkistrodon_contortrix_contortrix NADH dehydrogenase (ubiquinone) 1 alpha
SB0247CVR_bridger_k30_4426	64.73	55.13	NonToxin	NonToxin	GDAY02001482|Agkistrodon_contortrix_contortrix 28S ribosomal protein S17, mitochondrial
SB0247CVR_bridger_k30_4427	61.05	83.68	NonToxin	NonToxin	GDAY02000842|Agkistrodon_contortrix_contortrix Ezrin-like protein
SB0247CVR_bridger_k30_4452	4.29	8.7	NonToxin	NonToxin	GDAY02002485|Agkistrodon_contortrix_contortrix syntaxin 3
SB0247CVR_bridger_k30_4453	35.5	49.63	NonToxin	Uncharacterized	Uncharacterized
SB0247CVR_bridger_k30_4454	44.13	36.34	NonToxin	NonToxin	GBEX01000012|Crotalus_adamanteus 2-oxoglutarate dehydrogenase, mitochondrial-like
SB0247CVR_bridger_k30_4471	53.76	55.66	NonToxin	NonToxin	GBEX01003514|Crotalus_adamanteus eukaryotic translation initiation factor 3
SB0247CVR_bridger_k30_4475	71.56	77.48	NonToxin	NonToxin	GAAZ01001890|Crotalus_horridus Proliferation-associated protein 2G4-like
SB0247CVR_bridger_k30_4482	3.32	3.33	NonToxin	NonToxin	ENSACAG00000012912|ENSACAP00000012653|TREX2 TREX2 three prime repair exonuclease 2 [Source:HGNC Symbol;Acc:HGNC:12270]
SB0247CVR_bridger_k30_4495	71.9	90.01	NonToxin	NonToxin	WD and tetratricopeptide repeats 1
SB0247CVR_bridger_k30_44999	3.91	2.9	NonToxin	Uncharacterized	Uncharacterized
SB0247CVR_bridger_k30_4528	21.45	21.16	NonToxin	NonToxin	GDAY02001368|Agkistrodon_contortrix_contortrix Membrane-bound transcription factor site-1
SB0247CVR_bridger_k30_4546	9.47	11.02	NonToxin	NonToxin	ENSNSUP00000014256,1|SPSB1 SPSB1 splA/ryanodine receptor domain and SOCS box containing 1 [Source:HGNC Symbol;Acc:HGNC:30628]
SB0247CVR_bridger_k30_45475	1.36	4.21	NonToxin	Uncharacterized	Uncharacterized
SB0247CVR_bridger_k30_4575	53.32	45.85	NonToxin	NonToxin	GBSH01002102|Boiga_irregularis 26S proteasome non-ATPase regulatory subunit
SB0247CVR_bridger_k30_4576	5.92	4.02	NonToxin	NonToxin	GDAY02001974|Agkistrodon_contortrix_contortrix Neutral and basic amino acid transport protein
SB0247CVR_bridger_k30_45860	2.96	8.42	NonToxin	Uncharacterized	Uncharacterized
SB0247CVR_bridger_k30_4603	39.66	31.93	NonToxin	NonToxin	ENSPVIG00000005215|ENSPVIP00000006286|SLC17A9 SLC17A9 solute carrier family 17 member 9 [Source:NCBI gene;Acc:110084896]
SB0247CVR_bridger_k30_4604	72.56	82.39	NonToxin	NonToxin	ENSPVIG00000021905|ENSPVIP00000029726|UBE2Q1 UBE2Q1 ubiquitin conjugating enzyme E2 Q1 [Source:NCBI gene;Acc:110081000]
SB0247CVR_bridger_k30_4610	32.97	30.99	NonToxin	NonToxin	GAAZ01003024|Crotalus_horridus Zinc transporter ZIP9-like protein
SB0247CVR_bridger_k30_4653	79.26	60.45	NonToxin	NonToxin	GAAZ01001295|Crotalus_horridus Hypothetical protein LOC100561402
SB0247CVR_bridger_k30_4661	7.76	6.55	NonToxin	NonToxin	ENSNSUP00000027754,1|TFE3 TFE3 transcription factor binding to IGHM enhancer 3 [Source:HGNC Symbol;Acc:HGNC:11752]
SB0247CVR_bridger_k30_4683	25.09	22.59	NonToxin	NonToxin	GDAY02000739|Agkistrodon_contortrix_contortrix ubiquitin-conjugating enzyme E2Q-like protein 1
SB0247CVR_bridger_k30_4711	45.46	42.72	NonToxin	NonToxin	GDAY02000776|Agkistrodon_contortrix_contortrix emerin-like protein
SB0247CVR_bridger_k30_47446	2.72	2.1	NonToxin	Uncharacterized	Uncharacterized
SB0247CVR_bridger_k30_4745	48	47.75	NonToxin	NonToxin	ENSPVIG00000017915|ENSPVIP00000023722|USP7 USP7 ubiquitin specific peptidase 7 [Source:NCBI gene;Acc:110090438]
SB0247CVR_bridger_k30_4777	23.2	12.92	NonToxin	NonToxin	GDAY02002052|Agkistrodon_contortrix_contortrix RNA binding motif protein 47
SB0247CVR_bridger_k30_4782	59.96	40.18	NonToxin	NonToxin	GBEX01000189|Crotalus_adamanteus 5'-AMP-activated protein kinase beta-1
SB0247CVR_bridger_k30_4802	64.54	53.51	NonToxin	NonToxin	GAAZ01001044|Crotalus_horridus GTP-binding protein SAR1a
SB0247CVR_bridger_k30_4809	108.25	143.16	NonToxin	Uncharacterized	Uncharacterized
SB0247CVR_bridger_k30_4815	73.68	66.53	NonToxin	NonToxin	GAAZ01001605|Crotalus_horridus Sorting nexin-12
SB0247CVR_bridger_k30_4819	75.26	54.52	NonToxin	Uncharacterized	Uncharacterized
SB0247CVR_bridger_k30_4823	51.22	39.46	NonToxin	NonToxin	GDAY02002163|Agkistrodon_contortrix_contortrix tRNA methyltransferase 112
SB0247CVR_bridger_k30_4844	79.6	74.07	NonToxin	NonToxin	GDAY02001542|Agkistrodon_contortrix_contortrix NADH dehydrogenase (ubiquinone) iron-sulfur
SB0247CVR_bridger_k30_48511	4.14	2.85	NonToxin	Uncharacterized	Uncharacterized
SB0247CVR_bridger_k30_488	1718.56	1831.86	NonToxin	NonToxin	GAAZ01002198|Crotalus_horridus 40S ribosomal protein S4
SB0247CVR_bridger_k30_4883	6.67	7.46	NonToxin	NonToxin	GBSI01001163|Hypsiglena_sp,_JMG-2014 INO80 complex subunit C-like
SB0247CVR_bridger_k30_4910	61.56	43.17	NonToxin	NonToxin	GDAY02001794|Agkistrodon_contortrix_contortrix Platelet-activating factor acetylhydrolase 2,
SB0247CVR_bridger_k30_4916	58.57	21.36	NonToxin	NonToxin	heterochromatin protein 1, binding protein 3
SB0247CVR_bridger_k30_4951	9.67	19.07	NonToxin	NonToxin	GBEX01000324|Crotalus_adamanteus ATP synthase subunit s, mitochondrial-like
SB0247CVR_bridger_k30_4955	3.59	3	NonToxin	NonToxin	ENSPVIG00000001337|ENSPVIP00000001455|ZDHHC20 ZDHHC20 zinc finger DHHC-type containing 20 [Source:NCBI gene;Acc:110083532]
SB0247CVR_bridger_k30_4958	76.37	75.89	NonToxin	NonToxin	GAAZ01000185|Crotalus_horridus AP-1 complex subunit sigma-1A
SB0247CVR_bridger_k30_4959	55.3	38.72	NonToxin	NonToxin	GDAY02000710|Agkistrodon_contortrix_contortrix DNA polymerase delta subunit 2-like protein
SB0247CVR_bridger_k30_4993	5.32	3.72	NonToxin	NonToxin	GAAZ01001327|Crotalus_horridus protein LZIC-like protein
SB0247CVR_bridger_k30_4999	55.2	63.26	NonToxin	NonToxin	ubiquitin-conjugating enzyme E2, J2
SB0247CVR_bridger_k30_5003	37.15	37.98	NonToxin	Uncharacterized	Uncharacterized
SB0247CVR_bridger_k30_501	900.91	1265.28	NonToxin	NonToxin	ENSACAG00000000197|ENSACAP00000000190|RPLP1 RPLP1 ribosomal protein lateral stalk subunit P1 [Source:NCBI gene;Acc:100555464]
SB0247CVR_bridger_k30_5049	65.52	68.29	NonToxin	NonToxin	family with sequence similarity 96, member B
SB0247CVR_bridger_k30_5057	44.48	45.54	NonToxin	NonToxin	GDAY02000489|Agkistrodon_contortrix_contortrix casein kinase 2 beta polypeptide
SB0247CVR_bridger_k30_5060	47.22	42.15	NonToxin	Uncharacterized	Uncharacterized
SB0247CVR_bridger_k30_5076	57.11	55.98	NonToxin	NonToxin	GAAZ01002597|Crotalus_horridus Eukaryotic translation initiation factor 3
SB0247CVR_bridger_k30_50764	5.29	1.9	NonToxin	Uncharacterized	Uncharacterized
SB0247CVR_bridger_k30_5077	41.81	37.9	NonToxin	NonToxin	thioredoxin 2
SB0247CVR_bridger_k30_5080	47.73	60.3	NonToxin	NonToxin	GBEW01000089|Micrurus_fulvius AP-3 complex subunit sigma-1-like protein
SB0247CVR_bridger_k30_5086	54.71	59.85	NonToxin	Uncharacterized	Uncharacterized
SB0247CVR_bridger_k30_5096	48.36	30.15	NonToxin	NonToxin	ENSPVIG00000004752|ENSPVIP00000005821|ALDH6A1 ALDH6A1 aldehyde dehydrogenase 6 family member A1 [Source:NCBI gene;Acc:110086370]
SB0247CVR_bridger_k30_5099	36.14	38.24	NonToxin	NonToxin	ENSPVIG00000025133|ENSPVIP00000034398|FAM50B FAM50B family with sequence similarity 50 member A [Source:NCBI gene;Acc:110078600]
SB0247CVR_bridger_k30_5106	22.14	27.14	NonToxin	NonToxin	GAAZ01001656|Crotalus_horridus nuclear ubiquitous casein and cyclin-dependent
SB0247CVR_bridger_k30_512	74.11	57.03	NonToxin	Uncharacterized	Uncharacterized
SB0247CVR_bridger_k30_5124	9.35	12.63	NonToxin	NonToxin	ENSNSUP00000007495,1
SB0247CVR_bridger_k30_5139	33.48	43.05	NonToxin	NonToxin	KIAA2013
SB0247CVR_bridger_k30_5163	61.16	65.97	NonToxin	NonToxin	GDAY02002596|Agkistrodon_contortrix_contortrix Eukaryotic translation initiation factor 4H-like
SB0247CVR_bridger_k30_5186	24.61	38.27	NonToxin	Uncharacterized	Uncharacterized
SB0247CVR_bridger_k30_5187	57.92	56.09	NonToxin	NonToxin	GAAZ01001566|Crotalus_horridus NADH dehydrogenase (ubiquinone) flavoprotein 1,
SB0247CVR_bridger_k30_5190	12.12	11.42	NonToxin	NonToxin	GAAZ01001520|Crotalus_horridus charged multivesicular body protein 2b-like
SB0247CVR_bridger_k30_5192	60.43	142.83	NonToxin	Uncharacterized	Uncharacterized
SB0247CVR_bridger_k30_5195	61.24	90.39	NonToxin	NonToxin	GDAY02000412|Agkistrodon_contortrix_contortrix Cathepsin B-like protein
SB0247CVR_bridger_k30_5202	58.32	61.8	NonToxin	NonToxin	ENSNSUP00000016485,1|NDUFA2 NDUFA2 NADH:ubiquinone oxidoreductase subunit A2 [Source:HGNC Symbol;Acc:HGNC:7685]
SB0247CVR_bridger_k30_5220	63.54	73.77	NonToxin	Uncharacterized	Uncharacterized
SB0247CVR_bridger_k30_5221	52.65	55.87	NonToxin	NonToxin	GDAY02001257|Agkistrodon_contortrix_contortrix Lathosterol oxidase-like protein
SB0247CVR_bridger_k30_5222	44.92	42.63	NonToxin	NonToxin	GBSH01001754|Boiga_irregularis NADPH-cytochrome P450 oxidoreductase
SB0247CVR_bridger_k30_526	22.32	36.8	NonToxin	NonToxin	GDAY02001192|Agkistrodon_contortrix_contortrix Protein jagunal 1-like protein
SB0247CVR_bridger_k30_5263	50.41	50.24	NonToxin	NonToxin	GAAZ01000801|Crotalus_horridus CCAAT/enhancer-binding protein gamma-like
SB0247CVR_bridger_k30_5276	76.13	65.07	NonToxin	NonToxin	GAAZ01001556|Crotalus_horridus NADH dehydrogenase (ubiquinone) 1 beta
SB0247CVR_bridger_k30_5281	50.3	38.77	NonToxin	NonToxin	GBSH01001314|Boiga_irregularis HRAS-like suppressor 3
SB0247CVR_bridger_k30_5299	35.58	43.91	NonToxin	NonToxin	GBEX01000071|Crotalus_adamanteus actin-related protein 2/3 complex subunit 1A
SB0247CVR_bridger_k30_5382	26.68	25.38	NonToxin	NonToxin	GDAY02000498|Agkistrodon_contortrix_contortrix Cleavage and polyadenylation specific factor 3,
SB0247CVR_bridger_k30_539	9.32	2.65	NonToxin	Uncharacterized	Uncharacterized
SB0247CVR_bridger_k30_5391	32.63	40.96	NonToxin	NonToxin	GBEX01003950|Crotalus_adamanteus Vesicle-associated membrane protein 8
SB0247CVR_bridger_k30_5398	55.99	62.48	NonToxin	NonToxin	ENSACAG00000013584|ENSACAP00000013459|DNAJA2 DNAJA2 DnaJ heat shock protein family (Hsp40) member A2 [Source:NCBI gene;Acc:100556398]
SB0247CVR_bridger_k30_5419	46.02	59.42	NonToxin	NonToxin	GAAZ01002869|Crotalus_horridus UMP-CMP kinase-like protein
SB0247CVR_bridger_k30_5435	38.12	27.93	NonToxin	NonToxin	GDAY02002390|Agkistrodon_contortrix_contortrix stAR-related lipid transfer protein 5-like
SB0247CVR_bridger_k30_5464	52.7	32.53	NonToxin	NonToxin	lysine (K)-specific demethylase 1B
SB0247CVR_bridger_k30_5465	37.36	46.06	NonToxin	NonToxin	GBEX01002790|Crotalus_adamanteus Reticulon-3-like protein
SB0247CVR_bridger_k30_547	1149.53	778.23	NonToxin	Uncharacterized	Uncharacterized
SB0247CVR_bridger_k30_5481	26.69	38.22	NonToxin	NonToxin	GBEX01001901|Crotalus_adamanteus major facilitator superfamily domain-containing
SB0247CVR_bridger_k30_5484	51.21	41.1	NonToxin	NonToxin	ENSNSUP00000022239,1
SB0247CVR_bridger_k30_5496	55.44	53.1	NonToxin	NonToxin	GBSH01002760|Boiga_irregularis Thioredoxin domain-containing protein 15-like
SB0247CVR_bridger_k30_5503	10.45	14.25	NonToxin	NonToxin	GDAY02000286|Agkistrodon_contortrix_contortrix Bridging integrator 3-like protein
SB0247CVR_bridger_k30_5509	23.25	16.28	NonToxin	NonToxin	GAAZ01000721|Crotalus_horridus DnaJ subfamily C member 1-like protein
SB0247CVR_bridger_k30_554	44.93	55.32	NonToxin	NonToxin	ENSNSUP00000026327,1|MAN1A2 MAN1A2 mannosidase alpha class 1A member 2 [Source:HGNC Symbol;Acc:HGNC:6822]
SB0247CVR_bridger_k30_5552	37.06	52	NonToxin	NonToxin	GDAY02001009|Agkistrodon_contortrix_contortrix growth hormone inducible transmembrane protein
SB0247CVR_bridger_k30_557	1249.42	820.99	NonToxin	NonToxin	GAAZ01001733|Crotalus_horridus Protein disulfide-isomerase A6-like protein
SB0247CVR_bridger_k30_558	10.19	15.25	NonToxin	Uncharacterized	Uncharacterized
SB0247CVR_bridger_k30_5590	21.72	20.44	NonToxin	NonToxin	GAAZ01002049|Crotalus_horridus rho-related GTP-binding protein RhoC-like
SB0247CVR_bridger_k30_5591	8.76	12.5	NonToxin	NonToxin	DEAD (Asp-Glu-Ala-Asp) box helicase 1
SB0247CVR_bridger_k30_5650	32.65	46.64	NonToxin	NonToxin	GBSH01001495|Boiga_irregularis putative protein LOC100563422
SB0247CVR_bridger_k30_5652	8.25	1.54	NonToxin	NonToxin	PIN2/TERF1 interacting, telomerase inhibitor 1
SB0247CVR_bridger_k30_5681	55.91	56.59	NonToxin	Uncharacterized	Uncharacterized
SB0247CVR_bridger_k30_5694	15.14	21.59	NonToxin	NonToxin	GDAY02000427|Agkistrodon_contortrix_contortrix coiled-coil domain containing 75
SB0247CVR_bridger_k30_5695	23.24	37.65	NonToxin	Uncharacterized	Uncharacterized
SB0247CVR_bridger_k30_5706	28.41	20.46	NonToxin	Uncharacterized	Uncharacterized
SB0247CVR_bridger_k30_5707	18.19	29.61	NonToxin	NonToxin	A kinase (PRKA) anchor protein 1
SB0247CVR_bridger_k30_5712	40.85	66.46	NonToxin	NonToxin	GBEW01000949|Micrurus_fulvius Serine/threonine-protein phosphatase PP1-beta
SB0247CVR_bridger_k30_5719	55.52	58.9	NonToxin	Uncharacterized	Uncharacterized
SB0247CVR_bridger_k30_5720	39.24	37.36	NonToxin	NonToxin	GDAY02000747|Agkistrodon_contortrix_contortrix ectonucleoside triphosphate diphosphohydrolase 7
SB0247CVR_bridger_k30_5726	43.67	64.09	NonToxin	NonToxin	ENSNSUP00000007785,1|TMEM123 TMEM123 transmembrane protein 123 [Source:HGNC Symbol;Acc:HGNC:30138]
SB0247CVR_bridger_k30_5746	46.64	33.28	NonToxin	Uncharacterized	Uncharacterized
SB0247CVR_bridger_k30_5752	57.8	40.3	NonToxin	NonToxin	ENSNSUP00000004458,1|SMDT1 SMDT1 single-pass membrane protein with aspartate rich tail 1 [Source:HGNC Symbol;Acc:HGNC:25055]
SB0247CVR_bridger_k30_577	928.22	963	NonToxin	NonToxin	GBEW01000850|Micrurus_fulvius 60S ribosomal protein L21
SB0247CVR_bridger_k30_5794	49.49	59.9	NonToxin	NonToxin	ENSPVIG00000015637|ENSPVIP00000020493|GTF2A2 GTF2A2 general transcription factor IIA subunit 2 [Source:NCBI gene;Acc:110074507]
SB0247CVR_bridger_k30_5815	22.18	24.39	NonToxin	NonToxin	GDAY02002058|Agkistrodon_contortrix_contortrix ATP-dependent RNA helicase DDX19B
SB0247CVR_bridger_k30_5832	52.68	49.22	NonToxin	NonToxin	GBEW01000286|Micrurus_fulvius DET1- and DDB1-associated protein 1
SB0247CVR_bridger_k30_584	1509.3	1336.06	NonToxin	NonToxin	GBEW01000882|Micrurus_fulvius 40S ribosomal protein S13
SB0247CVR_bridger_k30_5849	49.74	54.57	NonToxin	NonToxin	GBSI01000977|Hypsiglena_sp,_JMG-2014 Glutaredoxin-3
SB0247CVR_bridger_k30_5860	3.31	3.01	NonToxin	NonToxin	ENSNSUP00000019342,1|SLC25A19 SLC25A19 solute carrier family 25 member 19 [Source:HGNC Symbol;Acc:HGNC:14409]
SB0247CVR_bridger_k30_5869	24.75	26.11	NonToxin	NonToxin	GBEX01001982|Crotalus_adamanteus MGC84775 protein
SB0247CVR_bridger_k30_588	1180.63	1209.48	NonToxin	NonToxin	GAAZ01002189|Crotalus_horridus 40S ribosomal protein S24
SB0247CVR_bridger_k30_5917	37.02	42.6	NonToxin	NonToxin	ENSNSUP00000012250,1|CA5B CA5B carbonic anhydrase 5B [Source:HGNC Symbol;Acc:HGNC:1378]
SB0247CVR_bridger_k30_5924	43.93	34.53	NonToxin	NonToxin	GAAZ01002896|Crotalus_horridus Vacuolar protein sorting-associated protein
SB0247CVR_bridger_k30_5930	49.93	57.21	NonToxin	NonToxin	GDAY02002523|Agkistrodon_contortrix_contortrix Tetraspanin-3-like protein
SB0247CVR_bridger_k30_5933	33.96	37.23	NonToxin	NonToxin	GBEX01003965|Crotalus_adamanteus V-type proton ATPase 116 kDa subunit a
SB0247CVR_bridger_k30_5935	51.51	46.22	NonToxin	NonToxin	GAAZ01001440|Crotalus_horridus Mitochondrial carrier 2-like protein
SB0247CVR_bridger_k30_5941	1.15	2.46	NonToxin	Uncharacterized	Uncharacterized
SB0247CVR_bridger_k30_5954	16.83	19.61	NonToxin	NonToxin	GAAZ01001160|Crotalus_horridus Insulin-induced 1 protein-like protein
SB0247CVR_bridger_k30_5956	59.63	68.96	NonToxin	NonToxin	GAAZ01002583|Crotalus_horridus Eukaryotic translation initiation factor 4E-like
SB0247CVR_bridger_k30_5959	37.77	29.6	NonToxin	NonToxin	eukaryotic translation initiation factor 4H
SB0247CVR_bridger_k30_5979	44.11	43.48	NonToxin	NonToxin	abhydrolase domain containing 13
SB0247CVR_bridger_k30_599	7.95	6.43	NonToxin	NonToxin	GDAY02001117|Agkistrodon_contortrix_contortrix 17beta hydroxysteroid dehydrogenase
SB0247CVR_bridger_k30_6028	34.63	26.49	NonToxin	NonToxin	GDAY02000932|Agkistrodon_contortrix_contortrix GDP-fucose transporter 1-like protein
SB0247CVR_bridger_k30_6040	39.98	45.75	NonToxin	NonToxin	GAAZ01001926|Crotalus_horridus Proteasome activator complex subunit 2-like
SB0247CVR_bridger_k30_606	1104.44	941.67	NonToxin	NonToxin	GAAZ01000762|Crotalus_horridus Elongation factor 2
SB0247CVR_bridger_k30_607	1110.13	942.35	NonToxin	NonToxin	GBEX01002916|Crotalus_adamanteus 60S ribosomal protein L13a
SB0247CVR_bridger_k30_6070	29.65	29.01	NonToxin	NonToxin	GAAZ01001792|Crotalus_horridus Phosphoserine aminotransferase
SB0247CVR_bridger_k30_608	1327.97	1034.25	NonToxin	NonToxin	GDAY02001589|Agkistrodon_contortrix_contortrix mesencephalic astrocyte-derived neurotrophic
SB0247CVR_bridger_k30_6103	12.24	9.91	NonToxin	NonToxin	GAAZ01002424|Crotalus_horridus steroid receptor RNA activator 1-like protein
SB0247CVR_bridger_k30_6104	39.23	39.76	NonToxin	NonToxin	GAAZ01002631|Crotalus_horridus Transmembrane protein 147
SB0247CVR_bridger_k30_6115	48.35	43.63	NonToxin	NonToxin	pleiotrophin
SB0247CVR_bridger_k30_6116	16.62	14.48	NonToxin	NonToxin	GDAY02001577|Agkistrodon_contortrix_contortrix large neutral amino acids transporter small
SB0247CVR_bridger_k30_612	381.07	1213.76	NonToxin	NonToxin	GBEW01000896|Micrurus_fulvius 40S ribosomal protein S29
SB0247CVR_bridger_k30_6147	54.35	44.54	NonToxin	Uncharacterized	Uncharacterized
SB0247CVR_bridger_k30_6165	34.09	37.4	NonToxin	NonToxin	GBSH01003088|Boiga_irregularis vacuolar protein sorting-associated protein 33B
SB0247CVR_bridger_k30_6177	49.8	50.51	NonToxin	NonToxin	isoprenylcysteine carboxyl methyltransferase
SB0247CVR_bridger_k30_6186	41.93	65.33	NonToxin	NonToxin	ENSNSUP00000024470,1
SB0247CVR_bridger_k30_6189	35.52	40.47	NonToxin	Uncharacterized	Uncharacterized
SB0247CVR_bridger_k30_6207	47.53	91.27	NonToxin	NonToxin	GBEW01000729|Micrurus_fulvius Pre-mRNA branch site protein p14
SB0247CVR_bridger_k30_623	55.73	128.17	NonToxin	NonToxin	GBEX01002379|Crotalus_adamanteus pantetheinase
SB0247CVR_bridger_k30_6239	38.35	33.73	NonToxin	NonToxin	eukaryotic translation elongation factor 1 epsilon 1
SB0247CVR_bridger_k30_6241	36.52	74.13	NonToxin	NonToxin	GDAY02000676|Agkistrodon_contortrix_contortrix N(G),N(G)-dimethylarginine
SB0247CVR_bridger_k30_6274	51.27	55.97	NonToxin	Uncharacterized	Uncharacterized
SB0247CVR_bridger_k30_6287	49.99	60.37	NonToxin	NonToxin	GAAZ01000262|Crotalus_horridus Barrier-to-autointegration factor-like protein
SB0247CVR_bridger_k30_6295	34.34	30.42	NonToxin	NonToxin	GAAZ01000577|Crotalus_horridus Cortactin
SB0247CVR_bridger_k30_6310	42.33	35.4	NonToxin	NonToxin	GBEX01003623|Crotalus_adamanteus Transmembrane protein 66
SB0247CVR_bridger_k30_632	873.83	807.97	NonToxin	NonToxin	ENSNSUP00000008065,1
SB0247CVR_bridger_k30_633	962.05	1187.06	NonToxin	NonToxin	GBSH01003153|Boiga_irregularis Xaa-Pro aminopeptidase 2
SB0247CVR_bridger_k30_6330	50.85	53.81	NonToxin	NonToxin	SRY (sex determining region Y)-box 2
SB0247CVR_bridger_k30_6332	14.62	25.04	NonToxin	NonToxin	GAAZ01000095|Crotalus_horridus ADP-ribosylation factor-like protein 4A-like
SB0247CVR_bridger_k30_6351	13.61	7.93	NonToxin	NonToxin	GAAZ01000019|Crotalus_horridus Acetoacetyl-CoA synthetase-like protein
SB0247CVR_bridger_k30_6352	5.24	2.18	NonToxin	Uncharacterized	Uncharacterized
SB0247CVR_bridger_k30_6389	13.83	15.39	NonToxin	Uncharacterized	Uncharacterized
SB0247CVR_bridger_k30_6419	70.72	71.5	NonToxin	NonToxin	GBEW01000984|Micrurus_fulvius Small ubiquitin-related modifier 1
SB0247CVR_bridger_k30_6425	42.19	39.93	NonToxin	NonToxin	GDAY02002347|Agkistrodon_contortrix_contortrix hypothetical protein
SB0247CVR_bridger_k30_6444	45.44	41.67	NonToxin	Uncharacterized	Uncharacterized
SB0247CVR_bridger_k30_6473	47.61	49.09	NonToxin	Uncharacterized	Uncharacterized
SB0247CVR_bridger_k30_650	17.93	22.04	NonToxin	Uncharacterized	Uncharacterized
SB0247CVR_bridger_k30_6523	57.13	52.93	NonToxin	NonToxin	GAAZ01001266|Crotalus_horridus Leydig cell tumor 10 kDa protein
SB0247CVR_bridger_k30_653	12.24	17.95	NonToxin	Uncharacterized	Uncharacterized
SB0247CVR_bridger_k30_6530	41.99	28.06	NonToxin	NonToxin	ENSNSUP00000015102,1
SB0247CVR_bridger_k30_6536	42.19	52.1	NonToxin	NonToxin	GDAY02000015|Agkistrodon_contortrix_contortrix 6-phosphogluconate dehydrogenase,
SB0247CVR_bridger_k30_6549	6.83	6.77	NonToxin	NonToxin	origin recognition complex, subunit 2
SB0247CVR_bridger_k30_6557	33.07	49.64	NonToxin	NonToxin	GAAZ01000631|Crotalus_horridus Cytochrome b reductase 1
SB0247CVR_bridger_k30_6560	44.74	40.4	NonToxin	NonToxin	ENSACAG00000010309|ENSACAP00000010105|SPON2 SPON2 spondin 2 [Source:NCBI gene;Acc:100556664]
SB0247CVR_bridger_k30_6587	37.01	35.6	NonToxin	NonToxin	GDAY02001956|Agkistrodon_contortrix_contortrix RAC-beta serine/threonine-protein kinase
SB0247CVR_bridger_k30_6588	23.76	26.35	NonToxin	NonToxin	GDAY02000072|Agkistrodon_contortrix_contortrix putative adenosylhomocysteinase 2-like protein
SB0247CVR_bridger_k30_6595	37.09	20.89	NonToxin	NonToxin	GAAZ01001010|Crotalus_horridus Golgi phosphoprotein 3-like protein
SB0247CVR_bridger_k30_6619	58.24	72.82	NonToxin	NonToxin	GBSI01000247|Hypsiglena_sp,_JMG-2014 AP-2 complex subunit sigma
SB0247CVR_bridger_k30_6637	55.81	43.83	NonToxin	Uncharacterized	Uncharacterized
SB0247CVR_bridger_k30_6660	32.27	45.58	NonToxin	NonToxin	GAAZ01001078|Crotalus_horridus Histidine triad nucleotide-binding protein
SB0247CVR_bridger_k30_6691	26.9	25.66	NonToxin	NonToxin	GAAZ01002453|Crotalus_horridus SURP and G-patch domain-containing protein 2
SB0247CVR_bridger_k30_6694	51.85	63.56	NonToxin	NonToxin	GAAZ01001096|Crotalus_horridus Non-histone chromosomal protein HMG-14A-like
SB0247CVR_bridger_k30_6708	7.88	5.5	NonToxin	NonToxin	GAAZ01001714|Crotalus_horridus Pantothenate kinase 3-like protein
SB0247CVR_bridger_k30_6709	19.17	19.94	NonToxin	NonToxin	GDAY02002195|Agkistrodon_contortrix_contortrix succinyl-CoA:3-ketoacid-coenzyme A transferase
SB0247CVR_bridger_k30_6710	2.24	5.45	NonToxin	Uncharacterized	Uncharacterized
SB0247CVR_bridger_k30_6713	29.11	90.4	NonToxin	NonToxin	GDAY02000148|Agkistrodon_contortrix_contortrix Progressive ankylosis protein-like protein
SB0247CVR_bridger_k30_672	1.99	1.71	NonToxin	Uncharacterized	Uncharacterized
SB0247CVR_bridger_k30_6723	33.64	28.76	NonToxin	NonToxin	GBEX01003489|Crotalus_adamanteus 3-ketoacyl-CoA thiolase, mitochondrial-like
SB0247CVR_bridger_k30_6730	40.05	31.25	NonToxin	NonToxin	GAAZ01000781|Crotalus_horridus Electron transfer flavoprotein subunit beta-like
SB0247CVR_bridger_k30_6746	37.61	41.04	NonToxin	NonToxin	GAAZ01001938|Crotalus_horridus 26S proteasome non-ATPase regulatory subunit
SB0247CVR_bridger_k30_6747	19.96	22.92	NonToxin	NonToxin	GBEX01000860|Crotalus_adamanteus Cystatin-1
SB0247CVR_bridger_k30_6748	10.82	8.94	NonToxin	NonToxin	GDAY02000809|Agkistrodon_contortrix_contortrix ER degradation enhancer, mannosidase alpha-like
SB0247CVR_bridger_k30_6767	36.04	39.89	NonToxin	NonToxin	GAAZ01000505|Crotalus_horridus chitinase-3-like protein 1-like protein
SB0247CVR_bridger_k30_6799	35.59	35.07	NonToxin	NonToxin	GBEX01000560|Crotalus_adamanteus Protein canopy 2-like protein
SB0247CVR_bridger_k30_6802	38.39	40.02	NonToxin	NonToxin	GAAZ01001640|Crotalus_horridus NSFL1 cofactor p47-like protein
SB0247CVR_bridger_k30_6832	33.94	33.25	NonToxin	NonToxin	GBEX01001833|Crotalus_adamanteus hypothetical protein LOC100552488
SB0247CVR_bridger_k30_6855	20.51	25.64	NonToxin	Uncharacterized	Uncharacterized
SB0247CVR_bridger_k30_6863	29.1	33.8	NonToxin	NonToxin	GDAY02002819|Agkistrodon_contortrix_contortrix ubiquitin specific protease 8 isoform 10
SB0247CVR_bridger_k30_6865	42.76	53.26	NonToxin	NonToxin	GAAZ01002671|Crotalus_horridus Protein Tob1-like protein
SB0247CVR_bridger_k30_6868	28.69	42.18	NonToxin	NonToxin	GBEX01001848|Crotalus_adamanteus uncharacterized protein LOC101938480
SB0247CVR_bridger_k30_6879	43.82	48.19	NonToxin	NonToxin	GAAZ01002925|Crotalus_horridus V-type proton ATPase subunit d 1
SB0247CVR_bridger_k30_6908	34.39	33.45	NonToxin	NonToxin	GBEW01000156|Micrurus_fulvius UPF0468 C16orf80-like protein
SB0247CVR_bridger_k30_6945	27.37	39.05	NonToxin	NonToxin	GBSH01002066|Boiga_irregularis Prenylated Rab acceptor protein 1
SB0247CVR_bridger_k30_6953	42.82	29.39	NonToxin	NonToxin	GAAZ01000225|Crotalus_horridus Copper transport protein ATOX1-like protein
SB0247CVR_bridger_k30_6966	2.89	7.71	NonToxin	NonToxin	GAAZ01001552|Crotalus_horridus NADH dehydrogenase (ubiquinone) 1 alpha
SB0247CVR_bridger_k30_6967	29.82	18.32	NonToxin	NonToxin	GAAZ01001552|Crotalus_horridus NADH dehydrogenase (ubiquinone) 1 alpha
SB0247CVR_bridger_k30_6968	38.23	22.42	NonToxin	NonToxin	GAAZ01000993|Crotalus_horridus glyoxalase domain-containing protein 4-like
SB0247CVR_bridger_k30_6995	40.34	36.5	NonToxin	NonToxin	heterogeneous nuclear ribonucleoprotein U (scaffold attachment factor A)
SB0247CVR_bridger_k30_7006	34.12	32.34	NonToxin	NonToxin	GAAZ01000306|Crotalus_horridus protein BTG1-like protein
SB0247CVR_bridger_k30_7026	34.11	38.76	NonToxin	NonToxin	GBSH01001591|Boiga_irregularis to methionine sulfoxide reductase A isoform 2
SB0247CVR_bridger_k30_703	721.68	619.59	NonToxin	NonToxin	GAAZ01002203|Crotalus_horridus 40S ribosomal protein S7
SB0247CVR_bridger_k30_7038	38.08	44.16	NonToxin	Uncharacterized	Uncharacterized
SB0247CVR_bridger_k30_7042	28.71	15.26	NonToxin	NonToxin	GDAY02002486|Agkistrodon_contortrix_contortrix syntaxin-5
SB0247CVR_bridger_k30_7047	12.02	9.7	NonToxin	NonToxin	GBEX01002824|Crotalus_adamanteus H/ACA ribonucleoprotein complex subunit 2-like
SB0247CVR_bridger_k30_7049	17.02	15.48	NonToxin	NonToxin	GAAZ01000536|Crotalus_horridus Charged multivesicular body protein 4c-like
SB0247CVR_bridger_k30_7053	40.83	46.93	NonToxin	NonToxin	GBEW01000988|Micrurus_fulvius Small nuclear ribonucleoprotein Sm D2
SB0247CVR_bridger_k30_7054	44.36	30.18	NonToxin	NonToxin	GAAZ01000371|Crotalus_horridus Costars family C6orf115-like protein
SB0247CVR_bridger_k30_7066	27.56	18.85	NonToxin	NonToxin	GDAY02001142|Agkistrodon_contortrix_contortrix Intermediate conductance calcium-activated
SB0247CVR_bridger_k30_7097	20.68	5.67	NonToxin	NonToxin	GBEX01002586|Crotalus_adamanteus PRA1 family protein 3-like protein
SB0247CVR_bridger_k30_7110	3.23	1.86	NonToxin	Uncharacterized	Uncharacterized
SB0247CVR_bridger_k30_7137	33.72	24.59	NonToxin	NonToxin	ENSNSUP00000020287,1|SH3BP5L SH3BP5L SH3 binding domain protein 5 like [Source:HGNC Symbol;Acc:HGNC:29360]
SB0247CVR_bridger_k30_7150	8.7	4.83	NonToxin	NonToxin	GBEX01003733|Crotalus_adamanteus tubulin-specific chaperone C-like
SB0247CVR_bridger_k30_7154	34	40.38	NonToxin	Uncharacterized	Uncharacterized
SB0247CVR_bridger_k30_7156	28.88	26.36	NonToxin	NonToxin	GBEX01003896|Crotalus_adamanteus protein unc-93 homolog B1
SB0247CVR_bridger_k30_7161	35.85	32.16	NonToxin	NonToxin	GBEX01001377|Crotalus_adamanteus Small glutamine-rich tetratricopeptide repeat
SB0247CVR_bridger_k30_7191	29.33	36.38	NonToxin	NonToxin	GBSH01000300|Boiga_irregularis Annexin A11
SB0247CVR_bridger_k30_7199	4.28	5.65	NonToxin	NonToxin	ENSNSUP00000002017,1|SLC41A3 SLC41A3 solute carrier family 41 member 3 [Source:HGNC Symbol;Acc:HGNC:31046]
SB0247CVR_bridger_k30_7216	7.3	8.84	NonToxin	NonToxin	ENSNSUP00000022594,1
SB0247CVR_bridger_k30_7221	32.8	37.15	NonToxin	NonToxin	GAAZ01002431|Crotalus_horridus Succinate-CoA ligase, GDP-forming, alpha
SB0247CVR_bridger_k30_7264	5.59	2.18	NonToxin	Uncharacterized	Uncharacterized
SB0247CVR_bridger_k30_728	25.77	8	NonToxin	NonToxin	SCO1 cytochrome c oxidase assembly protein
SB0247CVR_bridger_k30_7280	27.44	33.22	NonToxin	NonToxin	eukaryotic translation initiation factor 5B
SB0247CVR_bridger_k30_7282	20.92	25.07	NonToxin	NonToxin	splicing regulatory glutamine/lysine-rich protein 1
SB0247CVR_bridger_k30_7283	40.88	35.34	NonToxin	NonToxin	GBEX01002353|Crotalus_adamanteus ubiquitin thioesterase OTUB1
SB0247CVR_bridger_k30_7284	43.48	31.34	NonToxin	NonToxin	GDAY02002331|Agkistrodon_contortrix_contortrix Small cell adhesion glycoprotein-like protein
SB0247CVR_bridger_k30_7290	7.17	4	NonToxin	Uncharacterized	Uncharacterized
SB0247CVR_bridger_k30_7323	34.25	29.85	NonToxin	NonToxin	GBEX01001321|Crotalus_adamanteus glycerol-3-phosphate dehydrogenase (NAD(+)),
SB0247CVR_bridger_k30_7336	13.57	14.11	NonToxin	NonToxin	GAAZ01003026|Crotalus_horridus zinc transporter 9-like protein
SB0247CVR_bridger_k30_7339	37.77	27.75	NonToxin	NonToxin	GBEX01000783|Crotalus_adamanteus COP9 signalosome complex subunit 8-like protein
SB0247CVR_bridger_k30_7348	24.92	26.63	NonToxin	NonToxin	GAAZ01001149|Crotalus_horridus Importin subunit alpha-4
SB0247CVR_bridger_k30_7353	12.09	12.15	NonToxin	NonToxin	RAS-like, estrogen-regulated, growth inhibitor
SB0247CVR_bridger_k30_7354	37.31	24.87	NonToxin	NonToxin	GBSI01001134|Hypsiglena_sp,_JMG-2014 hypothetical protein 7
SB0247CVR_bridger_k30_7360	40.82	36.44	NonToxin	NonToxin	GDAY02002696|Agkistrodon_contortrix_contortrix cbp/p300-interacting transactivator 3
SB0247CVR_bridger_k30_7366	31.15	16.45	NonToxin	NonToxin	GDAY02002302|Agkistrodon_contortrix_contortrix Sialic acid synthase-like protein
SB0247CVR_bridger_k30_7371	43.27	48.29	NonToxin	NonToxin	ENSNSUP00000003291,1|BUD31 BUD31 BUD31 homolog [Source:HGNC Symbol;Acc:HGNC:29629]
SB0247CVR_bridger_k30_738	5.44	6.29	NonToxin	NonToxin	GBSH01002200|Boiga_irregularis target of rapamycin complex subunit lst8
SB0247CVR_bridger_k30_7426	28.15	26	NonToxin	NonToxin	GBEW01000969|Micrurus_fulvius SH3P2-like protein
SB0247CVR_bridger_k30_7430	33.66	72.26	NonToxin	NonToxin	GAAZ01000758|Crotalus_horridus Elongation factor 1-alpha 2
SB0247CVR_bridger_k30_744	42.73	20.77	NonToxin	NonToxin	GBSH01002455|Boiga_irregularis protein sel-1
SB0247CVR_bridger_k30_745	80.23	47.92	NonToxin	NonToxin	GAAZ01000142|Crotalus_horridus Aminopeptidase N
SB0247CVR_bridger_k30_7451	33.01	53.45	NonToxin	NonToxin	GAAZ01002679|Crotalus_horridus Torsin-1A-like protein
SB0247CVR_bridger_k30_7469	36.56	22.3	NonToxin	NonToxin	GDAY02002645|Agkistrodon_contortrix_contortrix Transmembrane protein 14C
SB0247CVR_bridger_k30_7480	34.63	37.48	NonToxin	NonToxin	GAAZ01001886|Crotalus_horridus Prohibitin-2
SB0247CVR_bridger_k30_75	72.58	35.81	NonToxin	Uncharacterized	Uncharacterized
SB0247CVR_bridger_k30_7500	30.42	24.73	NonToxin	NonToxin	glutaredoxin 2
SB0247CVR_bridger_k30_752	818.36	676.31	NonToxin	Uncharacterized	Uncharacterized
SB0247CVR_bridger_k30_7520	10.55	8.5	NonToxin	Uncharacterized	Uncharacterized
SB0247CVR_bridger_k30_7527	38.59	45.09	NonToxin	NonToxin	GAAZ01001925|Crotalus_horridus Proteasome activator complex subunit 1
SB0247CVR_bridger_k30_7530	23	23.58	NonToxin	Uncharacterized	Uncharacterized
SB0247CVR_bridger_k30_7533	27.77	23.43	NonToxin	NonToxin	GAAZ01002572|Crotalus_horridus eukaryotic translation initiation factor 2
SB0247CVR_bridger_k30_755	773.72	677.98	NonToxin	NonToxin	GAAZ01003048|Crotalus_horridus Glutaminyl-peptide cyclotransferase
SB0247CVR_bridger_k30_7558	47.16	82.25	NonToxin	NonToxin	GAAZ01000876|Crotalus_horridus Protein FAM32A protein
SB0247CVR_bridger_k30_7559	21.83	34.18	NonToxin	NonToxin	GDAY02000972|Agkistrodon_contortrix_contortrix Guanine nucleotide-binding protein G(k) subunit
SB0247CVR_bridger_k30_7591	15.04	12.68	NonToxin	Uncharacterized	Uncharacterized
SB0247CVR_bridger_k30_7598	13.6	20.39	NonToxin	Uncharacterized	Uncharacterized
SB0247CVR_bridger_k30_7605	46.69	31.17	NonToxin	NonToxin	GBSH01001633|Boiga_irregularis Mitotic-spindle organizing protein 2A-like
SB0247CVR_bridger_k30_7611	41.48	44.81	NonToxin	NonToxin	GBEW01000795|Micrurus_fulvius Ras-related protein Rap-1A
SB0247CVR_bridger_k30_7626	25.05	35.19	NonToxin	NonToxin	GAAZ01001411|Crotalus_horridus Alpha-1,6-mannosyl-glycoprotein
SB0247CVR_bridger_k30_7627	27.19	34.2	NonToxin	NonToxin	GDAY02000164|Agkistrodon_contortrix_contortrix Annexin A7-like protein
SB0247CVR_bridger_k30_7635	38.28	37.28	NonToxin	NonToxin	GDAY02000535|Agkistrodon_contortrix_contortrix COP9 signalosome complex subunit 3
SB0247CVR_bridger_k30_7653	10.9	9.36	NonToxin	NonToxin	GDAY02002557|Agkistrodon_contortrix_contortrix Transcription factor SOX-10-like protein
SB0247CVR_bridger_k30_7670	16.65	12.12	NonToxin	NonToxin	GDAY02001434|Agkistrodon_contortrix_contortrix Mitofusin-2-like protein
SB0247CVR_bridger_k30_7676	34.78	37.52	NonToxin	Uncharacterized	Uncharacterized
SB0247CVR_bridger_k30_7682	28.33	39.41	NonToxin	NonToxin	GDAY02002528|Agkistrodon_contortrix_contortrix tetratricopeptide repeat protein 1-like protein
SB0247CVR_bridger_k30_769	1052.45	1032.02	NonToxin	NonToxin	GBEW01000885|Micrurus_fulvius 40S ribosomal protein S15a
SB0247CVR_bridger_k30_7692	25.32	35.92	NonToxin	Uncharacterized	Uncharacterized
SB0247CVR_bridger_k30_7698	38.52	24.46	NonToxin	NonToxin	GAAZ01001501|Crotalus_horridus 28S ribosomal protein S18a, mitochondrial
SB0247CVR_bridger_k30_7715	31.92	45.02	NonToxin	NonToxin	GBEW01001080|Micrurus_fulvius Transmembrane protein 111
SB0247CVR_bridger_k30_7739	26.92	25.15	NonToxin	NonToxin	GDAY02000955|Agkistrodon_contortrix_contortrix microsomal glutathione S-transferase 1-like
SB0247CVR_bridger_k30_7747	31.9	26.87	NonToxin	Uncharacterized	Uncharacterized
SB0247CVR_bridger_k30_775	872.46	783.14	NonToxin	NonToxin	GAAZ01002137|Crotalus_horridus 60S ribosomal protein L18
SB0247CVR_bridger_k30_7753	20.4	31.87	NonToxin	NonToxin	GDAY02000948|Agkistrodon_contortrix_contortrix glucose 1-dehydrogenase
SB0247CVR_bridger_k30_776	988.15	870.59	NonToxin	NonToxin	GBEX01001076|Crotalus_adamanteus Elongation factor 1-gamma
SB0247CVR_bridger_k30_7766	18.22	13.13	NonToxin	Uncharacterized	Uncharacterized
SB0247CVR_bridger_k30_7818	30.29	34.68	NonToxin	NonToxin	GDAY02000537|Agkistrodon_contortrix_contortrix Copine-2-like protein
SB0247CVR_bridger_k30_785	2.28	1.67	NonToxin	Uncharacterized	Uncharacterized
SB0247CVR_bridger_k30_7864	32.81	40.6	NonToxin	NonToxin	GDAY02001180|Agkistrodon_contortrix_contortrix Isopentenyl-diphosphate Delta-isomerase 1-like
SB0247CVR_bridger_k30_7865	33.02	36.93	NonToxin	Uncharacterized	Uncharacterized
SB0247CVR_bridger_k30_7866	26.78	31.09	NonToxin	NonToxin	GDAY02001681|Agkistrodon_contortrix_contortrix oxidoreductase HTATIP2-like protein
SB0247CVR_bridger_k30_7867	36.54	48.62	NonToxin	Uncharacterized	Uncharacterized
SB0247CVR_bridger_k30_789	15.85	9.8	NonToxin	Uncharacterized	Uncharacterized
SB0247CVR_bridger_k30_790	861.92	805.69	NonToxin	NonToxin	GBEW01000853|Micrurus_fulvius 60S ribosomal protein L26
SB0247CVR_bridger_k30_7901	29.88	30.68	NonToxin	NonToxin	GBEX01002587|Crotalus_adamanteus pre-mRNA-processing factor 19
SB0247CVR_bridger_k30_7907	3.67	3.16	NonToxin	NonToxin	protein tyrosine phosphatase, receptor type, C
SB0247CVR_bridger_k30_7908	17.82	29.34	NonToxin	NonToxin	GAAZ01002547|Crotalus_horridus nuclear transcription factor Y subunit
SB0247CVR_bridger_k30_7909	18.98	22.42	NonToxin	NonToxin	GBEX01001978|Crotalus_adamanteus Mevalonate kinase
SB0247CVR_bridger_k30_7910	1.99	1.78	NonToxin	NonToxin	galactokinase 1
SB0247CVR_bridger_k30_7911	24.81	18.96	NonToxin	NonToxin	GAAZ01001126|Crotalus_horridus 3-hydroxyacyl-CoA dehydratase 3-like protein
SB0247CVR_bridger_k30_7939	31.68	26.49	NonToxin	NonToxin	GAAZ01001518|Crotalus_horridus mitochondrial import inner membrane translocase
SB0247CVR_bridger_k30_7955	28.4	38.67	NonToxin	NonToxin	GAAZ01000052|Crotalus_horridus Actin-related protein 2/3 complex subunit 5
SB0247CVR_bridger_k30_7956	23.17	32.72	NonToxin	NonToxin	GDAY02000013|Agkistrodon_contortrix_contortrix 5'-3' exoribonuclease 2-like
SB0247CVR_bridger_k30_7959	33.18	48.47	NonToxin	NonToxin	GAAZ01000639|Crotalus_horridus Cytochrome c oxidase subunit 7A-related protein,
SB0247CVR_bridger_k30_7963	4.8	1.33	NonToxin	NonToxin	GDAY02002806|Agkistrodon_contortrix_contortrix Ubiquitin carboxyl-terminal hydrolase isozyme L3
SB0247CVR_bridger_k30_7965	32.41	29.19	NonToxin	NonToxin	GDAY02002806|Agkistrodon_contortrix_contortrix Ubiquitin carboxyl-terminal hydrolase isozyme L3
SB0247CVR_bridger_k30_7968	18.1	21.68	NonToxin	NonToxin	GDAY02001134|Agkistrodon_contortrix_contortrix hypothetical protein
SB0247CVR_bridger_k30_7980	22.93	29.9	NonToxin	NonToxin	GAAZ01000742|Crotalus_horridus dynactin subunit 5
SB0247CVR_bridger_k30_7997	33.29	25.25	NonToxin	NonToxin	GBEX01003679|Crotalus_adamanteus transgelin
SB0247CVR_bridger_k30_800	948.72	1139.77	NonToxin	Uncharacterized	Uncharacterized
SB0247CVR_bridger_k30_8007	14.53	15.92	NonToxin	NonToxin	GBEW01001072|Micrurus_fulvius Mitochondrial import inner membrane translocase
SB0247CVR_bridger_k30_8008	21.84	25.63	NonToxin	NonToxin	ENSNSUP00000000971,1|RINT1 RINT1 RAD50 interactor 1 [Source:HGNC Symbol;Acc:HGNC:21876]
SB0247CVR_bridger_k30_801	818.4	865.71	NonToxin	NonToxin	|ENSPVIG00000010113|ENSPVIP00000012982| ribosomal protein S10 [Source:NCBI gene;Acc:110080277]
SB0247CVR_bridger_k30_8015	29.1	34.39	NonToxin	Uncharacterized	Uncharacterized
SB0247CVR_bridger_k30_8036	14.64	14.3	NonToxin	NonToxin	GDAY02000272|Agkistrodon_contortrix_contortrix Bifunctional 3'-phosphoadenosine
SB0247CVR_bridger_k30_805	994.02	976.52	NonToxin	NonToxin	GDAY02002116|Agkistrodon_contortrix_contortrix 60S ribosomal protein L4
SB0247CVR_bridger_k30_8074	20.63	25.97	NonToxin	NonToxin	GBEX01001161|Crotalus_adamanteus macrophage erythroblast attacher-like
SB0247CVR_bridger_k30_808	1039.02	799.26	NonToxin	NonToxin	GBSI01000815|Hypsiglena_sp,_JMG-2014 Transmembrane emp24 domain-containing protein
SB0247CVR_bridger_k30_8091	14.51	14.78	NonToxin	Uncharacterized	Uncharacterized
SB0247CVR_bridger_k30_8097	31.1	28.03	NonToxin	NonToxin	GDAY02000114|Agkistrodon_contortrix_contortrix putative alcohol dehydrogenase 5 (class III)
SB0247CVR_bridger_k30_81	13.36	16.16	NonToxin	NonToxin	GBEX01003164|Crotalus_adamanteus Pre-mRNA-splicing factor 18-like protein
SB0247CVR_bridger_k30_8121	28.8	50.1	NonToxin	Uncharacterized	Uncharacterized
SB0247CVR_bridger_k30_8122	35.92	37.3	NonToxin	NonToxin	GDAY02001806|Agkistrodon_contortrix_contortrix p53 apoptosis effector related to PMP-22-like
SB0247CVR_bridger_k30_8126	35.02	35.51	NonToxin	Uncharacterized	Uncharacterized
SB0247CVR_bridger_k30_8128	9.82	13.42	NonToxin	NonToxin	GAAZ01001019|Crotalus_horridus GPN-loop GTPase 3-like protein
SB0247CVR_bridger_k30_8154	26.88	32.12	NonToxin	NonToxin	GDAY02002374|Agkistrodon_contortrix_contortrix splicing factor 3b, subunit 2, 145kDa
SB0247CVR_bridger_k30_8164	23.87	54.32	NonToxin	NonToxin	GBEX01000451|Crotalus_adamanteus UPF0729 C18orf32-like protein
SB0247CVR_bridger_k30_8169	30.37	34.34	NonToxin	NonToxin	GDAY02001096|Agkistrodon_contortrix_contortrix Heparan sulfate glucosamine 3-O-sulfotransferase
SB0247CVR_bridger_k30_8179	36.26	34.38	NonToxin	NonToxin	GBEX01000855|Crotalus_adamanteus cysteine protease ATG4A-like protein
SB0247CVR_bridger_k30_8189	24.95	33.84	NonToxin	NonToxin	ENSNSUP00000012050,1
SB0247CVR_bridger_k30_82	25.31	29.03	NonToxin	NonToxin	Leucine-rich repeat
SB0247CVR_bridger_k30_8232	18.86	17.69	NonToxin	NonToxin	GBEW01000055|Micrurus_fulvius ADP-ribosylation factor-like protein 8B-like
SB0247CVR_bridger_k30_8260	32.61	39.47	NonToxin	Uncharacterized	Uncharacterized
SB0247CVR_bridger_k30_827	904.92	820.55	NonToxin	Uncharacterized	Uncharacterized
SB0247CVR_bridger_k30_8277	23	15.98	NonToxin	NonToxin	TAF5 RNA polymerase II, TATA box binding protein (TBP)-associated factor, 100kDa
SB0247CVR_bridger_k30_8282	26.74	11.12	NonToxin	NonToxin	GAAZ01000714|Crotalus_horridus DnaJ subfamily B member 14-like protein
SB0247CVR_bridger_k30_8291	31.34	27.72	NonToxin	NonToxin	GDAY02000128|Agkistrodon_contortrix_contortrix Aminoacyl tRNA synthase complex-interacting
SB0247CVR_bridger_k30_8302	27.29	31.88	NonToxin	NonToxin	GAAZ01002751|Crotalus_horridus tumor protein p53-inducible protein 11-like
SB0247CVR_bridger_k30_833	31.07	40.33	NonToxin	NonToxin	GBEX01002026|Crotalus_adamanteus mannosyl-oligosaccharide 1,2-alpha-mannosidase
SB0247CVR_bridger_k30_8330	28.86	67.34	NonToxin	NonToxin	ENSNSUP00000019168,1|HIBCH HIBCH 3-hydroxyisobutyryl-CoA hydrolase [Source:HGNC Symbol;Acc:HGNC:4908]
SB0247CVR_bridger_k30_8333	24.95	17.44	NonToxin	NonToxin	GBEX01002847|Crotalus_adamanteus RING finger and transmembrane domain-containing
SB0247CVR_bridger_k30_8343	29.6	27.1	NonToxin	NonToxin	GAAZ01001156|Crotalus_horridus Inorganic pyrophosphatase-like protein
SB0247CVR_bridger_k30_8350	28.88	28.85	NonToxin	NonToxin	GAAZ01000048|Crotalus_horridus Actin-related protein 2
SB0247CVR_bridger_k30_8352	24.42	43.52	NonToxin	NonToxin	GBEX01001197|Crotalus_adamanteus extracellular superoxide dismutase (Cu-Zn)-like
SB0247CVR_bridger_k30_8359	16.96	18.9	NonToxin	NonToxin	GAAZ01002081|Crotalus_horridus RING finger protein 24-like protein
SB0247CVR_bridger_k30_837	21.51	29.52	NonToxin	NonToxin	GDAY02001754|Agkistrodon_contortrix_contortrix phosphatidate cytidylyltransferase 1-like
SB0247CVR_bridger_k30_839	157.68	148.73	NonToxin	NonToxin	GDAY02001428|Agkistrodon_contortrix_contortrix Mitogen-activated protein kinase 6-like protein
SB0247CVR_bridger_k30_8403	5.89	10.94	NonToxin	NonToxin	GAAZ01001196|Crotalus_horridus Alpha-ketoglutarate-dependent dioxygenase alkB
SB0247CVR_bridger_k30_8423	29.14	32.64	NonToxin	NonToxin	GAAZ01002955|Crotalus_horridus WD repeat-containing protein 61-like protein
SB0247CVR_bridger_k30_8424	29.15	44.3	NonToxin	NonToxin	GDAY02000709|Agkistrodon_contortrix_contortrix DNA polymerase beta-like protein
SB0247CVR_bridger_k30_847	54.42	34.6	NonToxin	NonToxin	GBEX01003653|Crotalus_adamanteus traB domain-containing protein-like protein
SB0247CVR_bridger_k30_8488	10.53	16.43	NonToxin	NonToxin	small nuclear ribonucleoprotein 35kDa (U11/U12)
SB0247CVR_bridger_k30_8499	14.59	20.04	NonToxin	NonToxin	GDAY02002184|Agkistrodon_contortrix_contortrix Sterol-4-alpha-carboxylate 3-dehydrogenase,
SB0247CVR_bridger_k30_8514	25.2	22.73	NonToxin	NonToxin	GBEX01000059|Crotalus_adamanteus aconitate hydratase, mitochondrial
SB0247CVR_bridger_k30_8543	28.57	24.56	NonToxin	NonToxin	GBEX01003825|Crotalus_adamanteus ubiquitin carboxyl-terminal hydrolase isozyme
SB0247CVR_bridger_k30_8568	29.64	39.89	NonToxin	NonToxin	GDAY02000360|Agkistrodon_contortrix_contortrix Calcium-binding protein p22
SB0247CVR_bridger_k30_8583	19.7	26.05	NonToxin	Uncharacterized	Uncharacterized
SB0247CVR_bridger_k30_86	167.92	119.21	NonToxin	NonToxin	ENSNSUP00000028801,1|MAGT1 MAGT1 magnesium transporter 1 [Source:HGNC Symbol;Acc:HGNC:28880]
SB0247CVR_bridger_k30_8605	24.66	37.84	NonToxin	NonToxin	GAAZ01000601|Crotalus_horridus High affinity copper uptake protein 1-like
SB0247CVR_bridger_k30_864	124.33	129.68	NonToxin	NonToxin	ENSNSUP00000027153,1|ATP2C2 ATP2C2 ATPase secretory pathway Ca2+ transporting 2 [Source:HGNC Symbol;Acc:HGNC:29103]
SB0247CVR_bridger_k30_8643	30.5	30.18	NonToxin	NonToxin	GBEX01000686|Crotalus_adamanteus Chain A, Neuronal Synaptic Fusion Complex
SB0247CVR_bridger_k30_8699	18.9	11.58	NonToxin	NonToxin	GBEX01000801|Crotalus_adamanteus cysteine-rich secretory protein LCCL
SB0247CVR_bridger_k30_8724	22.53	28.97	NonToxin	NonToxin	GAAZ01001428|Crotalus_horridus Mimecan
SB0247CVR_bridger_k30_8732	3.39	6.02	NonToxin	Uncharacterized	Uncharacterized
SB0247CVR_bridger_k30_8733	30.97	38.94	NonToxin	NonToxin	GBEW01000645|Micrurus_fulvius Amino-terminal enhancer of split-like protein
SB0247CVR_bridger_k30_8755	19.85	22.56	NonToxin	NonToxin	ENSNSUP00000003084,1|ME1 ME1 malic enzyme 1 [Source:HGNC Symbol;Acc:HGNC:6983]
SB0247CVR_bridger_k30_876	607.9	543.47	NonToxin	NonToxin	GBEW01000906|Micrurus_fulvius 40S ribosomal protein S9
SB0247CVR_bridger_k30_8780	6.41	3.56	NonToxin	Uncharacterized	Uncharacterized
SB0247CVR_bridger_k30_8788	25.48	23.35	NonToxin	NonToxin	GBEW01001160|Micrurus_fulvius Ubiquitin-conjugating enzyme E2 G2
SB0247CVR_bridger_k30_8796	17.4	20	NonToxin	NonToxin	ENSNSUP00000023613,1
SB0247CVR_bridger_k30_8806	33.29	34.36	NonToxin	NonToxin	GAAZ01002110|Crotalus_horridus DNA-directed RNA polymerase II subunit RPB7-like
SB0247CVR_bridger_k30_8807	20.77	28.82	NonToxin	NonToxin	pinin, desmosome associated protein
SB0247CVR_bridger_k30_8818	32.52	50.56	NonToxin	Uncharacterized	Uncharacterized
SB0247CVR_bridger_k30_8821	21.43	29.3	NonToxin	NonToxin	ENSPVIG00000015765|ENSPVIP00000020666|FUBP3 FUBP3 far upstream element binding protein 3 [Source:NCBI gene;Acc:110079673]
SB0247CVR_bridger_k30_8826	8.15	1.79	NonToxin	Uncharacterized	Uncharacterized
SB0247CVR_bridger_k30_8835	37.14	30.24	NonToxin	NonToxin	GAAZ01002410|Crotalus_horridus splicing factor 3B subunit 5
SB0247CVR_bridger_k30_8836	20.3	17.11	NonToxin	NonToxin	ENSPVIG00000024377|ENSPVIP00000033341|ATP13A1 ATP13A1 ATPase 13A1 [Source:NCBI gene;Acc:110071569]
SB0247CVR_bridger_k30_8841	21.49	20.48	NonToxin	NonToxin	GAAZ01001920|Crotalus_horridus 26S proteasome non-ATPase regulatory subunit
SB0247CVR_bridger_k30_8850	3.35	4.06	NonToxin	NonToxin	metallophosphoesterase 1
SB0247CVR_bridger_k30_8867	23.56	24.25	NonToxin	NonToxin	ENSPVIG00000025323|ENSPVIP00000034702|TUBGCP4 TUBGCP4 tubulin gamma complex associated protein 4 [Source:NCBI gene;Acc:110077285]
SB0247CVR_bridger_k30_8869	6.26	4.2	NonToxin	NonToxin	GDAY02001440|Agkistrodon_contortrix_contortrix mitogen activated protein kinase 1
SB0247CVR_bridger_k30_8882	13.57	17.36	NonToxin	NonToxin	GAAZ01000459|Crotalus_horridus coiled-coil domain-containing protein 124
SB0247CVR_bridger_k30_892	20.58	24.18	NonToxin	Uncharacterized	Uncharacterized
SB0247CVR_bridger_k30_893	858.36	834.74	NonToxin	NonToxin	GAAZ01002130|Crotalus_horridus 60S ribosomal protein L11
SB0247CVR_bridger_k30_8932	16.66	23.6	NonToxin	NonToxin	GDAY02001471|Agkistrodon_contortrix_contortrix 39S ribosomal protein L23, mitochondrial
SB0247CVR_bridger_k30_894	813.36	713.85	NonToxin	NonToxin	GBEW01000854|Micrurus_fulvius 60S ribosomal protein L27
SB0247CVR_bridger_k30_896	497.1	543.13	NonToxin	NonToxin	GAAZ01001849|Crotalus_horridus Pancreatic progenitor cell differentiation and
SB0247CVR_bridger_k30_898	634.29	579.28	NonToxin	NonToxin	GAAZ01002169|Crotalus_horridus 60S ribosomal protein L8
SB0247CVR_bridger_k30_8984	24.83	18.11	NonToxin	NonToxin	GAAZ01001523|Crotalus_horridus NADH dehydrogenase (ubiquinone) iron-sulfur
SB0247CVR_bridger_k30_8986	23.07	21.31	NonToxin	NonToxin	GBEX01001591|Crotalus_adamanteus Isocitrate dehydrogenase (NAD) subunit gamma 1,
SB0247CVR_bridger_k30_9040	19.11	17.7	NonToxin	NonToxin	GBSI01000264|Hypsiglena_sp,_JMG-2014 arginyl aminopeptidase
SB0247CVR_bridger_k30_9083	23.42	36.5	NonToxin	NonToxin	GDAY02000109|Agkistrodon_contortrix_contortrix hypothetical protein
SB0247CVR_bridger_k30_9084	15.47	15.11	NonToxin	NonToxin	GBEX01001267|Crotalus_adamanteus f-box/WD repeat-containing protein 4-like
SB0247CVR_bridger_k30_9089	17.95	26.07	NonToxin	NonToxin	GDAY02002320|Agkistrodon_contortrix_contortrix solute carrier family 16, member 6
SB0247CVR_bridger_k30_9093	22.67	28.5	NonToxin	NonToxin	GAAZ01001856|Crotalus_horridus peptidyl-prolyl cis-trans isomerase FKBP8
SB0247CVR_bridger_k30_9105	29.15	35.84	NonToxin	NonToxin	ENSNSUP00000014738,1|PXMP2 PXMP2 peroxisomal membrane protein 2 [Source:HGNC Symbol;Acc:HGNC:9716]
SB0247CVR_bridger_k30_9106	27.23	25.85	NonToxin	NonToxin	GBEX01000421|Crotalus_adamanteus Bystin-like protein
SB0247CVR_bridger_k30_9107	28.82	32.22	NonToxin	Uncharacterized	Uncharacterized
SB0247CVR_bridger_k30_9115	1.14	1.92	NonToxin	NonToxin	TAF5 RNA polymerase II, TATA box binding protein (TBP)-associated factor, 100kDa
SB0247CVR_bridger_k30_918	38.78	36.49	NonToxin	NonToxin	GDAY02000244|Agkistrodon_contortrix_contortrix Autophagy-related 4D
SB0247CVR_bridger_k30_9222	19.04	22.56	NonToxin	NonToxin	GAAZ01001834|Crotalus_horridus Polyadenylate-binding protein-interacting
SB0247CVR_bridger_k30_9226	18.13	46.33	NonToxin	NonToxin	GDAY02002217|Agkistrodon_contortrix_contortrix selenoprotein U
SB0247CVR_bridger_k30_9234	24.65	38	NonToxin	NonToxin	GDAY02000866|Agkistrodon_contortrix_contortrix protein FAM84A-like
SB0247CVR_bridger_k30_9236	18.49	14.43	NonToxin	NonToxin	GBSH01003119|Boiga_irregularis V-type proton ATPase subunit S1
SB0247CVR_bridger_k30_924	683.68	641.95	NonToxin	Uncharacterized	Uncharacterized
SB0247CVR_bridger_k30_9249	20.38	21.97	NonToxin	NonToxin	GBEW01000143|Micrurus_fulvius Lys-63-specific deubiquitinase BRCC36-like
SB0247CVR_bridger_k30_9287	24.08	16.08	NonToxin	NonToxin	ENSNSUP00000015581,1|BLVRB BLVRB biliverdin reductase B [Source:HGNC Symbol;Acc:HGNC:1063]
SB0247CVR_bridger_k30_9289	23.87	26.07	NonToxin	NonToxin	GAAZ01001933|Crotalus_horridus 26S proteasome non-ATPase regulatory subunit
SB0247CVR_bridger_k30_9300	3.83	3.14	NonToxin	Uncharacterized	Uncharacterized
SB0247CVR_bridger_k30_9327	10.26	19.8	NonToxin	NonToxin	exocyst complex component 7
SB0247CVR_bridger_k30_9332	14.54	15.68	NonToxin	NonToxin	TBC1 domain family, member 30
SB0247CVR_bridger_k30_9350	6.3	5.53	NonToxin	Uncharacterized	Uncharacterized
SB0247CVR_bridger_k30_9362	24.13	29.07	NonToxin	NonToxin	GAAZ01000593|Crotalus_horridus C-terminal-binding protein 1
SB0247CVR_bridger_k30_9364	22.34	25.15	NonToxin	NonToxin	caspase 9, apoptosis-related cysteine peptidase
SB0247CVR_bridger_k30_9372	11.48	24.97	NonToxin	Uncharacterized	Uncharacterized
SB0247CVR_bridger_k30_9399	15.47	16.07	NonToxin	NonToxin	GDAY02001145|Agkistrodon_contortrix_contortrix Immediate early response 2 protein-like protein
SB0247CVR_bridger_k30_9418	21.9	12.67	NonToxin	NonToxin	GBEX01001497|Crotalus_adamanteus hematological and neurological expressed 1-like
SB0247CVR_bridger_k30_9429	51.23	40.33	NonToxin	NonToxin	GAAZ01001152|Crotalus_horridus mitochondrial import inner membrane translocase
SB0247CVR_bridger_k30_9471	15.08	15.6	NonToxin	NonToxin	GDAY02000035|Agkistrodon_contortrix_contortrix Cytoplasmic aconitate hydratase
SB0247CVR_bridger_k30_9531	11.18	3.83	NonToxin	NonToxin	mitochondrial ribosome recycling factor
SB0247CVR_bridger_k30_9533	15.29	17.67	NonToxin	NonToxin	GDAY02000988|Agkistrodon_contortrix_contortrix Golgi SNAP receptor complex member 1
SB0247CVR_bridger_k30_9539	26.98	29.61	NonToxin	NonToxin	phosphodiesterase 6D, cGMP-specific, rod, delta
SB0247CVR_bridger_k30_9566	21.58	17.98	NonToxin	NonToxin	GDAY02000845|Agkistrodon_contortrix_contortrix FACT complex subunit SSRP1-like isoform 1
SB0247CVR_bridger_k30_9570	14.22	9.06	NonToxin	NonToxin	GBEX01003642|Crotalus_adamanteus toll interacting protein
SB0247CVR_bridger_k30_9590	7.48	5.16	NonToxin	NonToxin	ENSPVIG00000011110|ENSPVIP00000014377|TRIB3 TRIB3 tribbles pseudokinase 3 [Source:NCBI gene;Acc:110090831]
SB0247CVR_bridger_k30_9594	18.91	21.39	NonToxin	NonToxin	ENSNSUP00000028550,1|KANSL3 KANSL3 KAT8 regulatory NSL complex subunit 3 [Source:HGNC Symbol;Acc:HGNC:25473]
SB0247CVR_bridger_k30_9597	21.84	23.33	NonToxin	Uncharacterized	Uncharacterized
SB0247CVR_bridger_k30_9631	14.87	19.36	NonToxin	NonToxin	GBEX01001391|Crotalus_adamanteus Glycogen phosphorylase, liver form
SB0247CVR_bridger_k30_9637	20.89	27.32	NonToxin	NonToxin	ENSNSUP00000005038,1|DLAT DLAT dihydrolipoamide S-acetyltransferase [Source:HGNC Symbol;Acc:HGNC:2896]
SB0247CVR_bridger_k30_9649	17.59	21.91	NonToxin	NonToxin	GDAY02001253|Agkistrodon_contortrix_contortrix lanosterol 14-alpha demethylase-like protein
SB0247CVR_bridger_k30_9654	19.7	19.31	NonToxin	NonToxin	GBEW01000418|Micrurus_fulvius guanine nucleotide-binding protein
SB0247CVR_bridger_k30_9656	20.77	31.09	NonToxin	NonToxin	GDAY02002366|Agkistrodon_contortrix_contortrix Sperm acrosome membrane-associated protein
SB0247CVR_bridger_k30_9660	16.99	31.63	NonToxin	NonToxin	GDAY02001354|Agkistrodon_contortrix_contortrix mannosyl-oligosaccharide glucosidase
SB0247CVR_bridger_k30_9671	22.76	26.87	NonToxin	NonToxin	GBEX01002455|Crotalus_adamanteus PHD finger-like domain-containing protein
SB0247CVR_bridger_k30_9673	3.59	3.18	NonToxin	NonToxin	GDAY02001408|Agkistrodon_contortrix_contortrix magnesium-dependent phosphatase 1-like
SB0247CVR_bridger_k30_9739	19.32	21.38	NonToxin	NonToxin	GDAY02001745|Agkistrodon_contortrix_contortrix pescadillo
SB0247CVR_bridger_k30_9741	24.83	15.55	NonToxin	NonToxin	GDAY02002646|Agkistrodon_contortrix_contortrix Transmembrane protein 14C
SB0247CVR_bridger_k30_9742	21.92	22.39	NonToxin	NonToxin	GAAZ01000724|Crotalus_horridus DnaJ subfamily C member 3-like protein
SB0247CVR_bridger_k30_9744	25.76	32.79	NonToxin	NonToxin	GBEW01001005|Micrurus_fulvius SUMO-conjugating enzyme UBC9-B
SB0247CVR_bridger_k30_9748	16.7	24.7	NonToxin	NonToxin	GDAY02001870|Agkistrodon_contortrix_contortrix Proline synthetase associated
SB0247CVR_bridger_k30_975	608.84	469.47	NonToxin	NonToxin	GAAZ01002245|Crotalus_horridus Protein transport protein Sec61 subunit alpha
SB0247CVR_bridger_k30_98	109.03	116.1	NonToxin	NonToxin	GBEW01000435|Micrurus_fulvius histone H3,3
SB0247CVR_bridger_k30_980	619.32	574.86	NonToxin	NonToxin	GDAY02002084|Agkistrodon_contortrix_contortrix 60S ribosomal protein L13
SB0247CVR_bridger_k30_9836	20.76	21.48	NonToxin	NonToxin	GDAY02002723|Agkistrodon_contortrix_contortrix hydroxyacyl-CoA dehydrogenase/3-ketoacyl-CoA
SB0247CVR_bridger_k30_9847	21.6	27.16	NonToxin	NonToxin	nuclear speckle splicing regulatory protein 1
SB0247CVR_bridger_k30_9850	15.05	17.14	NonToxin	NonToxin	NSE1 homolog, SMC5-SMC6 complex component
SB0247CVR_bridger_k30_9889	22.83	19.48	NonToxin	NonToxin	ENSNSUP00000018272,1|OTUD6B OTUD6B OTU domain containing 6B [Source:HGNC Symbol;Acc:HGNC:24281]
SB0247CVR_bridger_k30_9892	8.13	6.59	NonToxin	Uncharacterized	Uncharacterized
SB0247CVR_bridger_k30_9893	42.15	41.53	NonToxin	Uncharacterized	Uncharacterized
SB0247CVR_bridger_k30_9907	24.57	29.71	NonToxin	Uncharacterized	Uncharacterized
SB0247CVR_bridger_k30_9927	9.33	7.42	NonToxin	Uncharacterized	Uncharacterized
SB0247CVR_bridger_k30_994	20.6	29.48	NonToxin	NonToxin	GDAY02002521|Agkistrodon_contortrix_contortrix Tetraspanin-14-like protein
SB0247CVR_bridger_k30_9948	26.33	22.46	NonToxin	NonToxin	cathepsin O
SB0247CVR_bridger_k30_9949	25.62	31.07	NonToxin	NonToxin	ENSNSUP00000014268,1|MRPL12 MRPL12 mitochondrial ribosomal protein L12 [Source:HGNC Symbol;Acc:HGNC:10378]
SB0247CVR_bridger_k30_9950	16.68	21.89	NonToxin	NonToxin	GAAZ01001994|Crotalus_horridus RAD51 C-like protein
SB0247CVR_bridger_k30_9953	22.82	23.25	NonToxin	NonToxin	GAAZ01000192|Crotalus_horridus AP-3 complex subunit mu-1
SB0247CVR_bridger_k30_9965	9.51	9.4	NonToxin	NonToxin	ENSNSUP00000009707,1|FLAD1 FLAD1 flavin adenine dinucleotide synthetase 1 [Source:HGNC Symbol;Acc:HGNC:24671]
SB0247CVR_bridger_k30_9971	11.61	12.91	NonToxin	NonToxin	GDAY02002603|Agkistrodon_contortrix_contortrix transcription initiation factor TFIID subunit
SB0247CVR_bridger_k30_9990	29.13	36.36	NonToxin	NonToxin	GBEX01003736|Crotalus_adamanteus Tubulin-folding cofactor B
SB0247CVR_bridger_k30_9991	16.71	22.87	NonToxin	NonToxin	GDAY02001689|Agkistrodon_contortrix_contortrix p30 DBC protein
SB0247CVR_extender_default_116	10307.3	9382.11	NonToxin	NonToxin	GBEX01002409|Crotalus_adamanteus PDI
SB0247CVR_extender_default_131	1845.06	1681.21	NonToxin	NonToxin	GAAZ01002171|Crotalus_horridus 60S acidic ribosomal protein P0
SB0247CVR_extender_default_152	6213.95	3729.64	NonToxin	Uncharacterized	Uncharacterized
SB0247CVR_extender_overlap150_195	4921.16	1627.87	NonToxin	NonToxin	GAAZ01001034|Crotalus_horridus 78 kDa glucose-regulated protein
SB0247CVR_extender_overlap150_385	1350.26	1336.56	NonToxin	Uncharacterized	Uncharacterized
SB0247CVR_extender_seed2000_319	2023.38	2534.76	NonToxin	Uncharacterized	Uncharacterized
SB0247CVR_extender_seed2000_59	494.67	497.62	NonToxin	NonToxin	GBEW01000893|Micrurus_fulvius 40S ribosomal protein S23
SB0247CVR_extender_seed2000_690	867.74	896.25	NonToxin	NonToxin	GAAZ01002204|Crotalus_horridus 40S ribosomal protein S8
SB0247CVR_extender_seed2000_715	522.69	414.6	NonToxin	NonToxin	GBEW01000846|Micrurus_fulvius 60S ribosomal protein L15
SB0247CVR_extender_seed2000_858	1235.21	1044.1	NonToxin	NonToxin	GAAZ01002206|Crotalus_horridus 40S ribosomal protein SA
SB0247CVR_ngen_k21_100	25.27	27.52	NonToxin	NonToxin	GBEX01001020|Crotalus_adamanteus protein DPCD-like
SB0247CVR_ngen_k21_1018	140.7	119.61	NonToxin	NonToxin	GDAY02001535|Agkistrodon_contortrix_contortrix NADH dehydrogenase (ubiquinone) 1 beta
SB0247CVR_ngen_k21_1030	69.89	64.68	NonToxin	NonToxin	GDAY02002510|Agkistrodon_contortrix_contortrix T-complex protein 1 subunit gamma-like protein
SB0247CVR_ngen_k21_1038	131.87	111.68	NonToxin	NonToxin	COP9 signalosome subunit 5
SB0247CVR_ngen_k21_104	13.08	12.77	NonToxin	NonToxin	GAAZ01001519|Crotalus_horridus ubiquinone biosynthesis methyltransferase COQ5,
SB0247CVR_ngen_k21_1060	37.67	23.38	NonToxin	NonToxin	GDAY02002583|Agkistrodon_contortrix_contortrix Thymic stromal cotransporter-like protein
SB0247CVR_ngen_k21_1063	39.51	28.59	NonToxin	NonToxin	ENSPVIG00000008848|ENSPVIP00000011263|GPR180 GPR180 G protein-coupled receptor 180 [Source:NCBI gene;Acc:110073865]
SB0247CVR_ngen_k21_1072	65.66	82.55	NonToxin	Uncharacterized	Uncharacterized
SB0247CVR_ngen_k21_1073	70.01	58.43	NonToxin	NonToxin	GDAY02000507|Agkistrodon_contortrix_contortrix Clusterin
SB0247CVR_ngen_k21_1080	34.98	33.47	NonToxin	Uncharacterized	Uncharacterized
SB0247CVR_ngen_k21_1089	73.48	50.17	NonToxin	NonToxin	ENSNSUP00000013528,1|CREB3 CREB3 cAMP responsive element binding protein 3 [Source:HGNC Symbol;Acc:HGNC:2347]
SB0247CVR_ngen_k21_1096	47.46	43.69	NonToxin	NonToxin	GDAY02002943|Agkistrodon_contortrix_contortrix WD repeat-containing protein 1
SB0247CVR_ngen_k21_1117	40.57	30.58	NonToxin	NonToxin	GDAY02000113|Agkistrodon_contortrix_contortrix alanyl-tRNA synthetase
SB0247CVR_ngen_k21_1122	28.36	30.81	NonToxin	NonToxin	GBEX01000577|Crotalus_adamanteus Secretory carrier membrane protein 2
SB0247CVR_ngen_k21_1128	42.95	38.87	NonToxin	NonToxin	GDAY02000337|Agkistrodon_contortrix_contortrix Glycerol-3-phosphate acyltransferase 4-like
SB0247CVR_ngen_k21_1134	86.07	66.42	NonToxin	NonToxin	GBEX01003412|Crotalus_adamanteus Tetraspanin-13-like protein
SB0247CVR_ngen_k21_1139	8.23	8.75	NonToxin	Uncharacterized	Uncharacterized
SB0247CVR_ngen_k21_1155	36.16	34.43	NonToxin	NonToxin	GBEW01000128|Micrurus_fulvius Spliceosome RNA helicase BAT1-like protein
SB0247CVR_ngen_k21_1174	38.42	30.85	NonToxin	Uncharacterized	Uncharacterized
SB0247CVR_ngen_k21_1176	31.75	19.59	NonToxin	NonToxin	GBEX01003232|Crotalus_adamanteus sodium-independent sulfate anion
SB0247CVR_ngen_k21_1184	18.57	23.27	NonToxin	NonToxin	GBEX01001707|Crotalus_adamanteus putative KIAA1467-like protein
SB0247CVR_ngen_k21_1187	35.8	38.36	NonToxin	NonToxin	GDAY02001025|Agkistrodon_contortrix_contortrix Guanine nucleotide-binding protein-like 3-like
SB0247CVR_ngen_k21_1194	35	30.97	NonToxin	NonToxin	GDAY02000945|Agkistrodon_contortrix_contortrix glutamine-rich protein 1
SB0247CVR_ngen_k21_1196	32.47	20.68	NonToxin	NonToxin	GBEX01003673|Crotalus_adamanteus adenosine monophosphate-protein transferase
SB0247CVR_ngen_k21_1200	2.2	2.6	NonToxin	NonToxin	GDAY02001255|Agkistrodon_contortrix_contortrix Lasp-1 protein
SB0247CVR_ngen_k21_1206	12.13	9.15	NonToxin	NonToxin	GAAZ01001672|Crotalus_horridus Nuclear protein localization 4-like protein
SB0247CVR_ngen_k21_1209	57.55	77.2	NonToxin	Uncharacterized	Uncharacterized
SB0247CVR_ngen_k21_1210	88.69	94.41	NonToxin	NonToxin	GAAZ01000764|Crotalus_horridus Transcription elongation factor B polypeptide
SB0247CVR_ngen_k21_1213	18.81	14.93	NonToxin	NonToxin	GAAZ01001777|Crotalus_horridus phosphatidylinositol 3-kinase regulatory subunit
SB0247CVR_ngen_k21_1214	25.67	33.23	NonToxin	NonToxin	GAAZ01002433|Crotalus_horridus Succinyl-CoA ligase (ADP-forming) subunit beta,
SB0247CVR_ngen_k21_1228	43.01	34.11	NonToxin	NonToxin	ENSPVIG00000015437|ENSPVIP00000020229|NUCB1 NUCB1 nucleobindin 1 [Source:NCBI gene;Acc:110078513]
SB0247CVR_ngen_k21_1236	42.33	24.72	NonToxin	Uncharacterized	Uncharacterized
SB0247CVR_ngen_k21_1267	51.83	3.32	NonToxin	NonToxin	ENSPVIG00000011331|ENSPVIP00000016069|ENO3 ENO3 enolase 3 [Source:NCBI gene;Acc:110082386]
SB0247CVR_ngen_k21_1281	30.97	32.86	NonToxin	NonToxin	GAAZ01002295|Crotalus_horridus Serine-threonine kinase receptor-associated
SB0247CVR_ngen_k21_1302	41.4	27.46	NonToxin	NonToxin	GDAY02001861|Agkistrodon_contortrix_contortrix Prolactin regulatory element-binding protein
SB0247CVR_ngen_k21_1311	29.93	36.56	NonToxin	NonToxin	ENSNSUP00000005633,1|NCOA5 NCOA5 nuclear receptor coactivator 5 [Source:HGNC Symbol;Acc:HGNC:15909]
SB0247CVR_ngen_k21_1331	46.79	67.04	NonToxin	NonToxin	ENSPVIG00000012545|ENSPVIP00000016191|SELENOT SELENOT selenoprotein T [Source:NCBI gene;Acc:110073062]
SB0247CVR_ngen_k21_1348	85.06	30.22	NonToxin	NonToxin	GAAZ01001793|Crotalus_horridus Phosphoserine phosphatase
SB0247CVR_ngen_k21_1351	56.48	55.87	NonToxin	NonToxin	ENSNSUP00000026742,1|PNO1 PNO1 partner of NOB1 homolog [Source:HGNC Symbol;Acc:HGNC:32790]
SB0247CVR_ngen_k21_1353	27.66	42.37	NonToxin	NonToxin	GDAY02000064|Agkistrodon_contortrix_contortrix Alpha- and gamma-adaptin-binding protein
SB0247CVR_ngen_k21_1358	2.31	4.22	NonToxin	NonToxin	GBEX01003284|Crotalus_adamanteus single-stranded DNA-binding protein 3
SB0247CVR_ngen_k21_1380	53.73	54.52	NonToxin	NonToxin	ENSNSUP00000009681,1|SLC35B1 SLC35B1 solute carrier family 35 member B1 [Source:HGNC Symbol;Acc:HGNC:20798]
SB0247CVR_ngen_k21_1395	13.52	10.78	NonToxin	NonToxin	GDAY02000295|Agkistrodon_contortrix_contortrix protein BTG2-like protein
SB0247CVR_ngen_k21_1397	19.61	17.16	NonToxin	NonToxin	GAAZ01000335|Crotalus_horridus Putative C19orf47-like protein
SB0247CVR_ngen_k21_1398	19.25	34.85	NonToxin	NonToxin	GDAY02001227|Agkistrodon_contortrix_contortrix Calcium/calmodulin-dependent protein kinase type
SB0247CVR_ngen_k21_1400	44.79	34.63	NonToxin	NonToxin	ENSACAG00000005906|ENSACAP00000005805|KCMF1 KCMF1 potassium channel modulatory factor 1 [Source:NCBI gene;Acc:100561661]
SB0247CVR_ngen_k21_1456	56.83	93.46	NonToxin	NonToxin	C-type lectin domain family 3, member A
SB0247CVR_ngen_k21_1461	33.61	35.71	NonToxin	NonToxin	GBEX01000287|Crotalus_adamanteus Aspartyl-tRNA synthetase, cytoplasmic-like
SB0247CVR_ngen_k21_1463	88.39	76.04	NonToxin	NonToxin	GBSH01001670|Boiga_irregularis 39S ribosomal protein L24
SB0247CVR_ngen_k21_1464	28.09	29.71	NonToxin	NonToxin	GAAZ01002797|Crotalus_horridus Ubiquitin carboxyl-terminal hydrolase 14-like
SB0247CVR_ngen_k21_1486	53.93	61.03	NonToxin	NonToxin	GAAZ01000793|Crotalus_horridus Endophilin-B1-like protein
SB0247CVR_ngen_k21_1507	42.32	40.14	NonToxin	NonToxin	GDAY02001247|Agkistrodon_contortrix_contortrix L-lactate dehydrogenase A chain
SB0247CVR_ngen_k21_1514	13.17	14.22	NonToxin	NonToxin	GBEX01003149|Crotalus_adamanteus serine/threonine-protein phosphatase 2B
SB0247CVR_ngen_k21_1530	27.73	26.88	NonToxin	NonToxin	GBEX01002047|Crotalus_adamanteus Mannose-1-phosphate guanyltransferase alpha-like
SB0247CVR_ngen_k21_1535	47.27	49.94	NonToxin	NonToxin	GBSI01000086|Hypsiglena_sp,_JMG-2014 26S protease regulatory subunit S10B
SB0247CVR_ngen_k21_1545	41.76	58.62	NonToxin	NonToxin	GAAZ01001635|Crotalus_horridus Protein NOXP20-like protein
SB0247CVR_ngen_k21_1560	44.96	44.07	NonToxin	NonToxin	GDAY02001649|Agkistrodon_contortrix_contortrix nuclear migration protein nudC
SB0247CVR_ngen_k21_1565	29	34.62	NonToxin	NonToxin	GAAZ01002888|Crotalus_horridus Vacuolar protein sorting-associated protein
SB0247CVR_ngen_k21_1570	17.89	18.63	NonToxin	NonToxin	GBSH01001003|Boiga_irregularis epithelial splicing regulatory protein 1 isoform
SB0247CVR_ngen_k21_1578	2.66	3.38	NonToxin	NonToxin	small nuclear ribonucleoprotein 35kDa (U11/U12)
SB0247CVR_ngen_k21_1597	15.65	14.34	NonToxin	NonToxin	ankyrin repeat and FYVE domain containing 1
SB0247CVR_ngen_k21_1618	20.23	15.29	NonToxin	NonToxin	GAAZ01002895|Crotalus_horridus Vacuolar protein sorting-associated protein
SB0247CVR_ngen_k21_1622	23.19	3.09	NonToxin	NonToxin	ENSPVIG00000005257|ENSPVIP00000012191|PYGB PYGB glycogen phosphorylase B [Source:NCBI gene;Acc:110079549]
SB0247CVR_ngen_k21_1659	29.36	17.93	NonToxin	Uncharacterized	Uncharacterized
SB0247CVR_ngen_k21_1669	25.38	23.81	NonToxin	NonToxin	GBEX01003858|Crotalus_adamanteus E3 ubiquitin-protein ligase MGRN1
SB0247CVR_ngen_k21_1671	44.89	46.68	NonToxin	NonToxin	GBEX01002220|Crotalus_adamanteus sorting nexin-17
SB0247CVR_ngen_k21_1693	20.25	19.36	NonToxin	NonToxin	GBEX01003310|Crotalus_adamanteus Dihydrolipoyllysine-residue succinyltransferase,
SB0247CVR_ngen_k21_1707	39.82	24.43	NonToxin	NonToxin	GAAZ01001353|Crotalus_horridus dol-P-Man:Man(5)GlcNAc(2)-PP-Dol
SB0247CVR_ngen_k21_1711	22.14	32.94	NonToxin	Uncharacterized	Uncharacterized
SB0247CVR_ngen_k21_1746	47.92	59.53	NonToxin	NonToxin	solute carrier family 30 (zinc transporter), member 6
SB0247CVR_ngen_k21_1747	42.21	40.6	NonToxin	NonToxin	GAAZ01002492|Crotalus_horridus T-complex protein 1 subunit zeta
SB0247CVR_ngen_k21_1793	16.49	36.01	NonToxin	NonToxin	MHC class II-associated invariant chain
SB0247CVR_ngen_k21_1814	34.07	10.37	NonToxin	NonToxin	GBEX01000009|Crotalus_adamanteus 2'-5'-oligoadenylate synthetase 3
SB0247CVR_ngen_k21_1815	19.2	11	NonToxin	Uncharacterized	Uncharacterized
SB0247CVR_ngen_k21_1823	14.95	24.01	NonToxin	NonToxin	GDAY02000140|Agkistrodon_contortrix_contortrix amyloid beta A4 protein-like protein
SB0247CVR_ngen_k21_1824	53.85	53.82	NonToxin	NonToxin	GDAY02000844|Agkistrodon_contortrix_contortrix F-actin-capping protein subunit alpha-2
SB0247CVR_ngen_k21_183	18.05	32.01	NonToxin	NonToxin	GDAY02002599|Agkistrodon_contortrix_contortrix translation initiation factor eIF-2B subunit
SB0247CVR_ngen_k21_1849	84.57	66.04	NonToxin	NonToxin	GBEW01001192|Micrurus_fulvius UPF0139 membrane protein C19orf56
SB0247CVR_ngen_k21_1884	20.52	20.75	NonToxin	NonToxin	ENSNSUP00000007148,1|NBL1 NBL1 NBL1, DAN family BMP antagonist [Source:HGNC Symbol;Acc:HGNC:7650]
SB0247CVR_ngen_k21_190	18.17	14.47	NonToxin	NonToxin	mitochondrial ribosomal protein S10
SB0247CVR_ngen_k21_1910	14.27	15.62	NonToxin	NonToxin	GAAZ01001009|Crotalus_horridus Golgi pH regulator-like protein
SB0247CVR_ngen_k21_1947	15.12	21.33	NonToxin	NonToxin	GDAY02000814|Agkistrodon_contortrix_contortrix erlin-1-like protein
SB0247CVR_ngen_k21_1980	21.96	19.55	NonToxin	NonToxin	GBEX01001018|Crotalus_adamanteus deoxyribose-phosphate aldolase
SB0247CVR_ngen_k21_1997	36.28	5.37	NonToxin	NonToxin	ENSNSUP00000012296,1|HSPB1 HSPB1 heat shock protein family B (small) member 1 [Source:HGNC Symbol;Acc:HGNC:5246]
SB0247CVR_ngen_k21_2046	23.61	29.45	NonToxin	NonToxin	GAAZ01002962|Crotalus_horridus Wnt-4 protein
SB0247CVR_ngen_k21_2054	22.89	14.36	NonToxin	NonToxin	ENSNSUP00000004306,1|MBIP MBIP MAP3K12 binding inhibitory protein 1 [Source:HGNC Symbol;Acc:HGNC:20427]
SB0247CVR_ngen_k21_2057	18.81	23.32	NonToxin	NonToxin	GAAZ01000267|Crotalus_horridus Transmembrane BAX inhibitor motif-containing
SB0247CVR_ngen_k21_2060	24.27	25.61	NonToxin	Uncharacterized	Uncharacterized
SB0247CVR_ngen_k21_2065	14.72	15.04	NonToxin	NonToxin	GAAZ01001020|Crotalus_horridus Glycylpeptide N-tetradecanoyltransferase 1-like
SB0247CVR_ngen_k21_2100	28.04	27.93	NonToxin	Uncharacterized	Uncharacterized
SB0247CVR_ngen_k21_2127	80.77	72.98	NonToxin	NonToxin	GAAZ01001868|Crotalus_horridus Prefoldin subunit 1-like protein
SB0247CVR_ngen_k21_2162	18.26	14.62	NonToxin	NonToxin	GAAZ01001761|Crotalus_horridus Peroxisomal membrane protein 11B-like protein
SB0247CVR_ngen_k21_220	10.67	23.65	NonToxin	NonToxin	GBEX01002513|Crotalus_adamanteus Phospholipase A2 inhibitor subunit gamma B-like
SB0247CVR_ngen_k21_2216	24.86	16.99	NonToxin	NonToxin	GAAZ01001894|Crotalus_horridus promethin-like protein
SB0247CVR_ngen_k21_2263	81.07	66.81	NonToxin	NonToxin	GBEW01001177|Micrurus_fulvius E3 ubiquitin-protein ligase RBX1
SB0247CVR_ngen_k21_2297	12.93	8.68	NonToxin	NonToxin	GDAY02001388|Agkistrodon_contortrix_contortrix metaxin-2
SB0247CVR_ngen_k21_2342	54.36	59.15	NonToxin	NonToxin	GBEX01002256|Crotalus_adamanteus NODAL modulator 2
SB0247CVR_ngen_k21_2360	27.73	28.78	NonToxin	NonToxin	GDAY02000135|Agkistrodon_contortrix_contortrix Glucosamine--fructose-6-phosphate
SB0247CVR_ngen_k21_2409	18.23	12	NonToxin	Uncharacterized	Uncharacterized
SB0247CVR_ngen_k21_2416	127.94	89.51	NonToxin	NonToxin	GDAY02002226|Agkistrodon_contortrix_contortrix sarcoplasmic/endoplasmic reticulum calcium
SB0247CVR_ngen_k21_2420	41.21	38.02	NonToxin	NonToxin	eukaryotic translation initiation factor 4H
SB0247CVR_ngen_k21_2453	30.15	50.26	NonToxin	NonToxin	GBEX01001552|Crotalus_adamanteus Heterogeneous nuclear ribonucleoproteins C1/C2
SB0247CVR_ngen_k21_2460	20.54	12.33	NonToxin	NonToxin	GDAY02002963|Agkistrodon_contortrix_contortrix UPF0249 ydjC-like protein
SB0247CVR_ngen_k21_2497	241.5	239.24	NonToxin	NonToxin	GBEW01000023|Micrurus_fulvius Actin, cytoplasmic 1
SB0247CVR_ngen_k21_2507	130.89	129.49	NonToxin	Uncharacterized	Uncharacterized
SB0247CVR_ngen_k21_2539	863.48	722.58	NonToxin	NonToxin	ADAM metallopeptidase domain 22
SB0247CVR_ngen_k21_2570	203.55	187.58	NonToxin	Uncharacterized	Uncharacterized
SB0247CVR_ngen_k21_2592	85.43	79.61	NonToxin	NonToxin	GAAZ01000542|Crotalus_horridus Coatomer subunit beta-like protein
SB0247CVR_ngen_k21_2606	28.03	24.47	NonToxin	NonToxin	GDAY02001057|Agkistrodon_contortrix_contortrix Hexosaminidase D-like protein
SB0247CVR_ngen_k21_2624	49.4	41.45	NonToxin	NonToxin	GAAZ01002735|Crotalus_horridus Pre-rRNA-processing TSR2-like protein
SB0247CVR_ngen_k21_2637	39.78	25.27	NonToxin	NonToxin	GBEX01002495|Crotalus_adamanteus phytanoyl-CoA dioxygenase, peroxisomal
SB0247CVR_ngen_k21_2658	105.59	2.11	NonToxin	NonToxin	GDAY02000751|Agkistrodon_contortrix_contortrix Elongation factor 1-delta-like protein
SB0247CVR_ngen_k21_2681	27.9	33.26	NonToxin	NonToxin	GBEX01003836|Crotalus_adamanteus e3 ubiquitin-protein ligase RNF130-like protein
SB0247CVR_ngen_k21_2693	29.17	54.72	NonToxin	NonToxin	GBEX01000543|Crotalus_adamanteus Calpain-2 catalytic subunit-like protein
SB0247CVR_ngen_k21_2711	38.63	46.58	NonToxin	NonToxin	LUC7-like 3 pre-mRNA splicing factor
SB0247CVR_ngen_k21_2794	90.29	58.99	NonToxin	NonToxin	GAAZ01002712|Crotalus_horridus Translocon-associated protein subunit alpha-like
SB0247CVR_ngen_k21_28	20.24	35.01	NonToxin	NonToxin	GAAZ01001686|Crotalus_horridus OCIA domain-containing protein 1-like protein
SB0247CVR_ngen_k21_2820	1349.88	1115.1	NonToxin	Uncharacterized	Uncharacterized
SB0247CVR_ngen_k21_2824	99.15	86.13	NonToxin	NonToxin	GBEW01000435|Micrurus_fulvius histone H3,3
SB0247CVR_ngen_k21_2836	509.49	870.05	NonToxin	NonToxin	GBEW01000857|Micrurus_fulvius 60S ribosomal protein L30
SB0247CVR_ngen_k21_2845	25.16	49.36	NonToxin	NonToxin	ENSNSUP00000011065,1|ARFGAP3 ARFGAP3 ADP ribosylation factor GTPase activating protein 3 [Source:HGNC Symbol;Acc:HGNC:661]
SB0247CVR_ngen_k21_2849	64.16	68.58	NonToxin	NonToxin	GAAZ01002842|Crotalus_horridus E3 ubiquitin-protein ligase MARCH5
SB0247CVR_ngen_k21_2854	402.75	360.35	NonToxin	NonToxin	GBEX01002946|Crotalus_adamanteus 60S ribosomal protein L3
SB0247CVR_ngen_k21_2856	32.38	17.17	NonToxin	Uncharacterized	Uncharacterized
SB0247CVR_ngen_k21_2901	92.99	88.52	NonToxin	NonToxin	ENSPVIG00000009262|ENSPVIP00000011829|MAPK3 MAPK3 mitogen-activated protein kinase 3 [Source:NCBI gene;Acc:110081803]
SB0247CVR_ngen_k21_2921	24.56	19.25	NonToxin	NonToxin	GBEX01001375|Crotalus_adamanteus d-glucuronyl C5-epimerase
SB0247CVR_ngen_k21_2960	65.02	58.71	NonToxin	Uncharacterized	Uncharacterized
SB0247CVR_ngen_k21_2966	77.1	64.75	NonToxin	NonToxin	GAAZ01002451|Crotalus_horridus Surfeit locus protein 4-like protein
SB0247CVR_ngen_k21_2967	13.61	11.69	NonToxin	NonToxin	GDP-mannose 4,6-dehydratase
SB0247CVR_ngen_k21_2980	16.31	18.69	NonToxin	Uncharacterized	Uncharacterized
SB0247CVR_ngen_k21_2984	54.21	55.22	NonToxin	NonToxin	GAAZ01002314|Crotalus_horridus Serine/threonine-protein phosphatase 2A
SB0247CVR_ngen_k21_2993	290.06	84.04	NonToxin	NonToxin	GBEX01001502|Crotalus_adamanteus Hemoglobin subunit rho
SB0247CVR_ngen_k21_2994	125.35	28.52	NonToxin	NonToxin	GAAZ01001065|Crotalus_horridus Hemoglobin subunit beta-1-like protein
SB0247CVR_ngen_k21_2995	43.45	20	NonToxin	Uncharacterized	Uncharacterized
SB0247CVR_ngen_k21_3024	49.86	37.44	NonToxin	NonToxin	GAAZ01003028|Crotalus_horridus Zinc transporter 7-like protein
SB0247CVR_ngen_k21_3038	24.77	18.25	NonToxin	NonToxin	ENSNSUP00000019040,1|WDTC1 WDTC1 WD and tetratricopeptide repeats 1 [Source:HGNC Symbol;Acc:HGNC:29175]
SB0247CVR_ngen_k21_3041	93.87	63.75	NonToxin	Uncharacterized	Uncharacterized
SB0247CVR_ngen_k21_3065	24.1	34.92	NonToxin	NonToxin	palmitoyl-protein thioesterase 1
SB0247CVR_ngen_k21_3066	113.48	147.46	NonToxin	Uncharacterized	Uncharacterized
SB0247CVR_ngen_k21_3073	63.7	84.07	NonToxin	NonToxin	GBEW01000716|Micrurus_fulvius Poly(rC)-binding protein 2-like protein
SB0247CVR_ngen_k21_3081	118.99	67.91	NonToxin	NonToxin	GBSI01000203|Hypsiglena_sp,_JMG-2014 alanine aminotransferase 2
SB0247CVR_ngen_k21_3083	72.78	48.13	NonToxin	Uncharacterized	Uncharacterized
SB0247CVR_ngen_k21_309	9.03	8.75	NonToxin	Uncharacterized	Uncharacterized
SB0247CVR_ngen_k21_3095	73.78	50.87	NonToxin	Uncharacterized	Uncharacterized
SB0247CVR_ngen_k21_3100	102.32	121.84	NonToxin	Uncharacterized	Uncharacterized
SB0247CVR_ngen_k21_3106	342.16	344.67	NonToxin	NonToxin	ENSNSUP00000025251,1|TXNDC12 TXNDC12 thioredoxin domain containing 12 [Source:HGNC Symbol;Acc:HGNC:24626]
SB0247CVR_ngen_k21_3110	385.32	324.65	NonToxin	NonToxin	GDAY02001412|Agkistrodon_contortrix_contortrix Minor histocompatibility antigen H13
SB0247CVR_ngen_k21_3113	45.61	40.6	NonToxin	NonToxin	GAAZ01002250|Crotalus_horridus Secretory carrier-associated membrane protein 4
SB0247CVR_ngen_k21_3115	7.9	15	NonToxin	Uncharacterized	Uncharacterized
SB0247CVR_ngen_k21_3128	315.86	158.09	NonToxin	NonToxin	GBEX01003620|Crotalus_adamanteus Transmembrane protein 49
SB0247CVR_ngen_k21_3135	427.71	307.4	NonToxin	NonToxin	GDAY02000780|Agkistrodon_contortrix_contortrix Transmembrane emp24 domain-containing protein 9
SB0247CVR_ngen_k21_3137	47.89	50.24	NonToxin	Uncharacterized	Uncharacterized
SB0247CVR_ngen_k21_3149	136.55	126.52	NonToxin	NonToxin	GBEX01002201|Crotalus_adamanteus Nucleotide exchange factor SIL1-like protein
SB0247CVR_ngen_k21_3157	17.7	11.76	NonToxin	Uncharacterized	Uncharacterized
SB0247CVR_ngen_k21_3205	729.48	534.58	NonToxin	NonToxin	GBEX01002952|Crotalus_adamanteus 60S ribosomal protein L6
SB0247CVR_ngen_k21_3226	12.12	11.71	NonToxin	NonToxin	ENSPVIG00000002982|ENSPVIP00000003565|RRAGD RRAGD Ras related GTP binding D [Source:NCBI gene;Acc:110076136]
SB0247CVR_ngen_k21_3229	106.34	118.81	NonToxin	NonToxin	GAAZ01002358|Crotalus_horridus Signal recognition particle 54 kDa protein
SB0247CVR_ngen_k21_3235	60.17	54.07	NonToxin	NonToxin	ALG12, alpha-1,6-mannosyltransferase
SB0247CVR_ngen_k21_3241	317.08	247.13	NonToxin	NonToxin	GAAZ01000077|Crotalus_horridus Adenine phosphoribosyltransferase-like protein
SB0247CVR_ngen_k21_3246	41.67	9.91	NonToxin	Uncharacterized	Uncharacterized
SB0247CVR_ngen_k21_3266	303.27	120.08	NonToxin	Uncharacterized	Uncharacterized
SB0247CVR_ngen_k21_3270	37.9	40.77	NonToxin	NonToxin	GAAZ01002784|Crotalus_horridus Ubiquitin-conjugating enzyme E2
SB0247CVR_ngen_k21_3272	50.83	36.68	NonToxin	NonToxin	GBSH01001985|Boiga_irregularis pituitary homeobox 2-like isoform 2
SB0247CVR_ngen_k21_3316	86.68	25.44	NonToxin	NonToxin	multimerin 2
SB0247CVR_ngen_k21_3337	568.78	465	NonToxin	NonToxin	GBSI01000816|Hypsiglena_sp,_JMG-2014 Transmembrane emp24 domain-containing protein 2
SB0247CVR_ngen_k21_335	15.8	18.73	NonToxin	NonToxin	GBSI01000630|Hypsiglena_sp,_JMG-2014 UPF0428 protein CXorf56-like protein
SB0247CVR_ngen_k21_337	10.97	8.92	NonToxin	NonToxin	GAAZ01002271|Crotalus_horridus serine palmitoyltransferase 1-like protein
SB0247CVR_ngen_k21_3388	928.29	979.85	NonToxin	NonToxin	GAAZ01001832|Crotalus_horridus Polyadenylate-binding protein 1-like protein
SB0247CVR_ngen_k21_3439	86.96	88.28	NonToxin	NonToxin	GDAY02000418|Agkistrodon_contortrix_contortrix coiled-coil domain-containing protein 149-like
SB0247CVR_ngen_k21_3457	159.14	88.8	NonToxin	NonToxin	GBEX01001150|Crotalus_adamanteus Rndoplasmic reticulum-Golgi intermediate
SB0247CVR_ngen_k21_3472	233.77	261.02	NonToxin	NonToxin	GBEW01000893|Micrurus_fulvius 40S ribosomal protein S23
SB0247CVR_ngen_k21_3511	37.85	32.14	NonToxin	Uncharacterized	Uncharacterized
SB0247CVR_ngen_k21_3565	33.4	36.01	NonToxin	NonToxin	ENSPVIG00000019175|ENSPVIP00000025634|EMC1 EMC1 ER membrane protein complex subunit 1 [Source:NCBI gene;Acc:110073203]
SB0247CVR_ngen_k21_3585	368.39	264.34	NonToxin	NonToxin	GDAY02002540|Agkistrodon_contortrix_contortrix Cyclic AMP-dependent transcription factor ATF-4
SB0247CVR_ngen_k21_3589	258.17	229.59	NonToxin	NonToxin	GDAY02000638|Agkistrodon_contortrix_contortrix Dolichyl-diphosphooligosaccharide--protein
SB0247CVR_ngen_k21_3619	112.08	79.65	NonToxin	NonToxin	GAAZ01001117|Crotalus_horridus Heat shock 70 kDa protein-like protein
SB0247CVR_ngen_k21_3621	45.44	46.89	NonToxin	NonToxin	GAAZ01001118|Crotalus_horridus Heat shock cognate 71 kDa protein-like protein
SB0247CVR_ngen_k21_363	18.1	14.67	NonToxin	NonToxin	GBSH01002313|Boiga_irregularis Repressor of RNA polymerase III transcription
SB0247CVR_ngen_k21_3644	39.16	30.26	NonToxin	NonToxin	GDAY02001333|Agkistrodon_contortrix_contortrix Lysosomal acid phosphatase-like protein
[truncated: 5,359 more rows]

## Sheet: Table_S3Orthologous
Table_S3. Orthologous annotation between Bothrops cotiara and B. fonsecai. The expression values represents TPM (transcripts per million reads).
[truncated: 3,500 more rows]

[truncated: 4 more sheets: Table_S4Proteome, Table_S5Modularity, Table_S6MicroRNA, Table_S7TargetPrediction]
